# Supplementary material
Source: PubMed Central journal article supplement (PMC4117382)

# **Asymmetric Cross-Dehydrogenative Coupling Enabled by the Design and Application of Chiral Triazole- Containing Phosphoric Acids**

Andrew J. Neel, Jörg P. Hehn, Pascal F. Tripet and F. Dean Toste\*

Department of Chemistry, University of California, Berkeley, California 94720, United States.

## ***Supporting Information***

|                                        |             |
|----------------------------------------|-------------|
| General Information                    | <b>S2</b>   |
| Optimization of Catalysts and Solvents | <b>S3</b>   |
| Synthesis of Catalysts                 | <b>S7</b>   |
| Synthesis of Substrates                | <b>S29</b>  |
| Synthesis of Products                  | <b>S40</b>  |
| References                             | <b>S50</b>  |
| HPLC Traces                            | <b>S51</b>  |
| Catalyst NMR Spectra                   | <b>S67</b>  |
| Substrate NMR Spectra                  | <b>S113</b> |
| Product NMR Spectra                    | <b>S133</b> |

## General Information

Unless otherwise noted, all reagents were purchased from commercial suppliers and used without further purification. Enantioselective cross-dehydrogenative coupling (CDC) reactions were run in 2 dram (15 X 60 mm) vials equipped with a screw cap and stirred using a magnetic Teflon stir bar (1/2" X 5/16"), placed on the surface of a magnetic stir plate. Due to the heterogeneous nature of these reactions, it was important that fast and efficient stirring be maintained over the course of the reaction in order to obtain optimal results. Tetrahydrofuran, dichloromethane, diethyl ether, toluene, triethylamine and N,N-dimethylformamide were purified by passage through an activated alumina column under argon. Thin-layer chromatography (TLC) analysis of reaction mixtures was performed using Merck silica gel 60 F254 TLC plates, and visualized under UV or by staining with ceric ammonium molybdate or KMNO<sub>4</sub>. Column chromatography was performed on Merck Silica Gel 60 Å, 230 X 400 mesh. Nuclear magnetic resonance (NMR) spectra were recorded using Bruker AV-600, AV-500, DRX-500, AVQ-400, AVB-400 and AV-300 spectrometers. <sup>1</sup>H and <sup>13</sup>C chemical shifts are reported in ppm downfield of tetramethylsilane and referenced to residual solvent peak (CHCl<sub>3</sub>; δH = 7.26 ppm and δC = 77.0 ppm, DMSO; δH = 2.50 and δC = 39.5 ppm). Multiplicities are reported using the following abbreviations: s = singlet, d = doublet, t = triplet, q = quartet, app t = apparent triplet, m = multiplet, br = broad resonance. Solvent abbreviations are reported as follows: EtOAc = ethyl acetate, hex = hexanes, DCM = dichloromethane, Et<sub>2</sub>O = diethyl ether, MeOH = methanol, THF = tetrahydrofuran, DMF = N,N-dimethylformamide, Et<sub>3</sub>N = triethylamine. Mass spectral data were obtained from the Micro-Mass/Analytical Facility operated by the College of Chemistry, University of California, Berkeley. Enantiomeric excesses were measured on a Shimadzu VP Series Chiral HPLC using Chiralpak IA, IB, or IC columns. The syntheses of TRIP<sup>1</sup>, C<sub>8</sub>-TRIP<sup>2</sup>, TCYP<sup>3</sup>, STRIP<sup>4</sup>, and VAPOL PA<sup>5</sup> have been previously reported. **Caution:** Although we have not experienced any problems during the preparation and handling of the azides reported herein, appropriate safety precautions should be taken due to the explosive nature of organic azides, including the use of a blast shield during any manipulations involving azides. Azides **S3b**<sup>6</sup> and **S3l**<sup>7</sup> have been previously reported. Azide **S3c** was prepared by the method of Zhang,<sup>6</sup> **S3d**, **S3e** and **S3f** by the method of Guo,<sup>8</sup> and **S3g**, **S3h**, **S3i**, **S3j** and **S3k** by the method of Tor.<sup>9</sup> All azides were used directly without further purification. Racemic CDC products were synthesized by carrying out the reactions in toluene in the absence of catalyst.

## Optimization of Catalyst, Oxidant, Solvent and Base on Substrate 5a

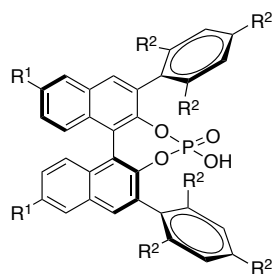

**(S)-TRIP:** R<sup>1</sup>= H, R<sup>2</sup>= *i*Pr

**(S)-C8-TRIP:** R<sup>1</sup>= C<sub>8</sub>H<sub>17</sub>, R<sup>2</sup>= *i*Pr

**(S)-TCYP:** R<sup>1</sup>= H, R<sup>2</sup>= C<sub>6</sub>H<sub>11</sub>

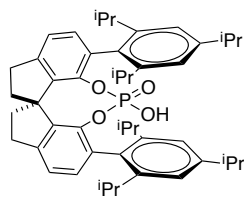

**(R)-STRIP**

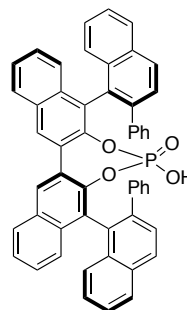

**(R,R)-Ph-DAP**

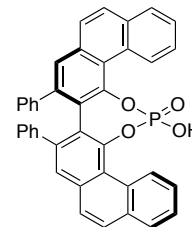

**(S)-VAPOL PA**

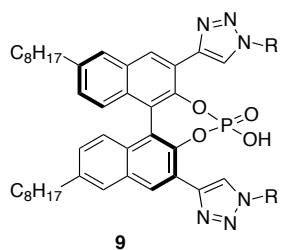

**9**

**9a** R = Bn<sup>a</sup>

**9b** R = CH(Ph)<sub>2</sub>

**9c** R = CH(1-Naph)<sub>2</sub>

**9d** R = 1-naphthyl

**9e** R = 9-anthracyl

**9f** R = 1-pyrenyl

**9g** R = 2,4,6-(Me)<sub>3</sub>C<sub>6</sub>H<sub>3</sub>

**9h** R = 2,4,6-(*i*Pr)<sub>3</sub>C<sub>6</sub>H<sub>3</sub>

**9i** R = 2,4,6-(*c*-C<sub>6</sub>H<sub>11</sub>)<sub>3</sub>C<sub>6</sub>H<sub>3</sub>

**9j** R = 4-(<sup>t</sup>Bu)C<sub>6</sub>H<sub>5</sub>

**9k** R = 3,5-(<sup>t</sup>Bu)<sub>2</sub>C<sub>6</sub>H<sub>4</sub>

**9l** R = 1-adamantyl

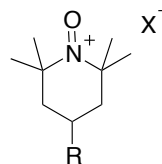

**[O]-1:** R = H, X = BF<sub>4</sub>

**[O]-2:** R = NHAc, X = NO<sub>3</sub>

**7:** R = NHAc, X = BF<sub>4</sub>

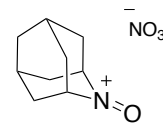

**[O]-3**

**Table S1. Catalyst Optimization on Substrate 5a**

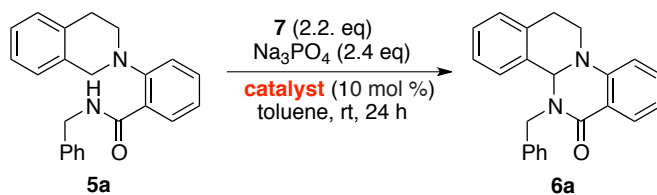

| Entry | catalyst              | conversion (%) <sup>a</sup> | ee (%) <sup>b</sup> |
|-------|-----------------------|-----------------------------|---------------------|
| 1     | ( <i>S</i> )-C8-TRIP  | 86                          | 8                   |
| 2     | ( <i>S</i> )-TCYP     | 95                          | 16                  |
| 3     | ( <i>R</i> )-STRIP    | 64                          | 30                  |
| 4     | ( <i>R,R</i> )-Ph-DAP | 69                          | -10 <sup>c</sup>    |
| 5     | ( <i>S</i> )-VAPOL PA | 97                          | 31                  |
| 6     | <b>9a</b>             | 97                          | -70                 |
| 7     | <b>9b</b>             | 99                          | -69                 |
| 8     | <b>9c</b>             | 75                          | -52                 |
| 9     | <b>9d</b>             | 97                          | -63                 |
| 10    | <b>9e</b>             | 92                          | -41                 |
| 11    | <b>9f</b>             | 77                          | 56                  |
| 12    | <b>9g</b>             | 92                          | -78                 |
| 13    | <b>9h</b>             | 92                          | -80                 |
| 14    | <b>9i</b>             | 91                          | -77                 |
| 15    | <b>9j</b>             | 91                          | -37                 |
| 16    | <b>9k</b>             | 92                          | -50                 |
| 17    | <b>9l</b>             | 75                          | -81                 |

<sup>a</sup> Determined by HPLC using 1,4-dinitrobenzene internal standard.

<sup>b</sup> Determined by chiral HPLC. <sup>c</sup> Negative sign indicates that opposite enantiomer predominates.

**Table S2. Oxidant Optimiazation on Substrate 5a**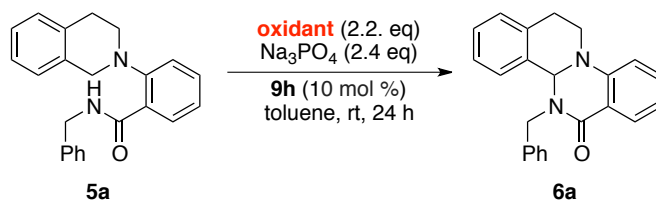

| Entry | Oxidant | Conversion (%) <sup>a</sup> | ee (%) <sup>b</sup> |
|-------|---------|-----------------------------|---------------------|
| 1     | [O]-1   | 95                          | 79                  |
| 2     | [O]-2   | 88                          | 78                  |
| 3     | 7       | 72                          | 79                  |
| 4     | [O]-3   | 32                          | 56                  |
| 5     | DDQ     | 0                           | nd                  |
| 6     | TBHP    | 4                           | 0                   |

<sup>a</sup>Determined by HPLC using using 1,4-dinitrobenzene internal standard. <sup>b</sup>Determined by chiral HPLC. DDQ = 2,3-dichloro-5,6-dicyano-1,4-benzoquinone. TBHP = *tert*-butyl hydroperoxide.

**Table S3. Solvent Optimization on Substrate 5a**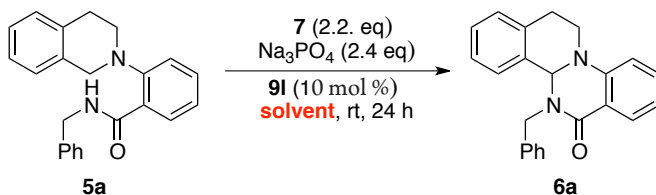

| Entry | Solvent             | Conversion <sup>a</sup> | ee (%) <sup>b</sup> |
|-------|---------------------|-------------------------|---------------------|
| 1     | hexanes             | 91                      | 27                  |
| 2     | Et <sub>2</sub> O   | 86                      | 78                  |
| 3     | THF                 | 95                      | 55                  |
| 4     | MeCN                | 69                      | 4                   |
| 5     | DCM                 | 43                      | 18                  |
| 6     | benzene             | 96                      | 73                  |
| 7     | toluene             | 93                      | 79                  |
| 8     | <i>o</i> -xylene    | 95                      | 82                  |
| 9     | <i>m</i> -xylene    | 95                      | 81                  |
| 10    | <i>p</i> -xylene    | 94                      | 82                  |
| 11    | xylenes             | 95                      | 81                  |
| 12    | mesitylene          | 92                      | 84                  |
| 13    | triethylbenzene     | 80                      | 80                  |
| 14    | triisopropylbenzene | 98                      | 80                  |
| 15    | fluorobenzene       | 92                      | 61                  |
| 16    | hexafluorobenzene   | 39                      | 76                  |
| 17    | <i>p</i> -xylene    | 91 (83) <sup>c</sup>    | 84                  |

<sup>a</sup>Determined by HPLC using 1,4-dinitrobenzene internal standard. <sup>b</sup>Determined by chiral HPLC. <sup>c</sup>Performed on 0.1 mmol scale. Value in parentheses reflects isolated yield

**Table S4. Base Optimization on Substrate 5h**

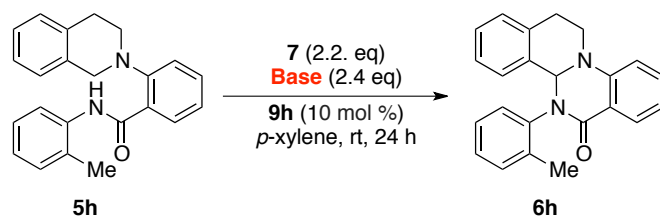

| Entry    | Base                             | Yield (%) <sup>a</sup> | ee (%) <sup>b</sup> |
|----------|----------------------------------|------------------------|---------------------|
| <b>1</b> | Na <sub>3</sub> PO <sub>4</sub>  | <b>65</b>              | <b>90</b>           |
| 2        | Na <sub>2</sub> HPO <sub>4</sub> | 38                     | 88                  |
| 3        | Na <sub>2</sub> CO <sub>3</sub>  | 24                     | 88                  |
| 4        | NaHCO <sub>3</sub>               | 21                     | 88                  |
| 5        | K <sub>2</sub> CO <sub>3</sub>   | 47                     | 88                  |
| 6        | Li <sub>2</sub> CO <sub>3</sub>  | 29                     | 82                  |

<sup>a</sup>Isolated yield <sup>b</sup>Determined by chiral HPLC

## Synthesis of Catalysts

Compounds **9a-l** were synthesized according to the reaction sequences depicted in Schemes S1 and S2.

### Scheme S1. Synthesis of Catalysts **9a-c** and **9g-l**

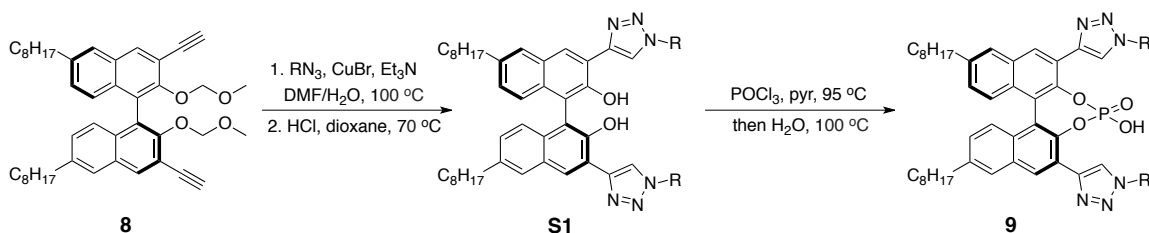

### Scheme S2. Synthesis of Catalysts **9d-f**

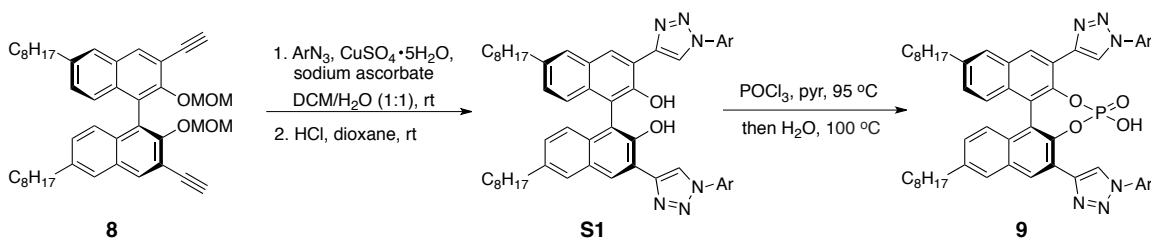

### (*S*)-3,3'-diiodo-2,2'-bis(methoxymethyl)-6,6'-dioctyl-1,1'-binaphthalene (**S2**)

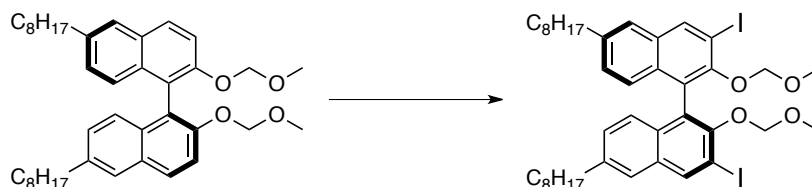

A magnetically stirred solution of (*S*)-2,2'-bis(methoxymethyl)-6,6'-dioctyl-1,1'-binaphthalene<sup>10</sup> (31.35 g, 52.35 mmol) in THF (500 mL) was cooled to  $-78\text{ }^\circ\text{C}$  and *n*-butyllithium (2.5 M solution in hexanes, 73 mL, 183.2 mmol) was added dropwise over the course of 15 min. After 30 min, the solution was warmed to  $0\text{ }^\circ\text{C}$  and stirred at this temperature for 2 h. The dark brown reaction mixture was then cooled to  $-78\text{ }^\circ\text{C}$  and iodine (49.82 g, 196.31 mmol) was added as a single portion. The solution was warmed to room temperature and stirred for an additional 2 h at which point saturated aqueous  $Na_2S_2O_3$  (200 mL) was carefully added and the resulting mixture was allowed to stir at room temperature for 30 min. The mixture was extracted with EtOAc (2 X 200 mL) and

the organic extracts were washed with H<sub>2</sub>O (200 mL) and brine (100 mL), dried (Na<sub>2</sub>SO<sub>4</sub>) and concentrated *in vacuo*. Purification of the crude residue by column chromatography on silica gel using Hex/Et<sub>2</sub>O as eluent (20:1) afforded the title compound (33.22 g, 39.05 mmol, 75 % yield) as a yellow oil. <sup>1</sup>H NMR (500 MHz, CDCl<sub>3</sub>) δ 8.47 (s, 1H), 7.54 (s, 2H), 7.17 (d, *J* = 9.0 Hz, 2H), 7.11 (d, *J* = 9.0 Hz, 2H), 4.81 (d, *J* = 5.7 Hz, 2H), 4.70 (d, *J* = 5.6 Hz, 2H), 2.73 (t, *J* = 7.7 Hz, 4H), 2.62 (s, 6H), 1.74 - 1.63 (m, 4H), 1.39 - 1.22 (m, 20H), 0.89 (t, *J* = 6.7 Hz, 6H). <sup>13</sup>C NMR (126 MHz, CDCl<sub>3</sub>) δ 151.33, 140.58, 139.40, 132.47, 132.23, 128.76, 126.41, 126.23, 125.00, 99.35, 92.31, 56.53, 35.84, 31.89, 31.10, 29.48, 29.37, 29.27, 22.69, 14.15. HRMS (EI) found [M+Na]<sup>+</sup> 873.1852, C<sub>40</sub>H<sub>52</sub>O<sub>4</sub>I<sub>2</sub>Na requires 873.1847.

**(S)-3,3'-diethynyl-2,2'-bis(methoxymethyl)-6,6'-dioctyl-1,1'-binaphthalene (8)**

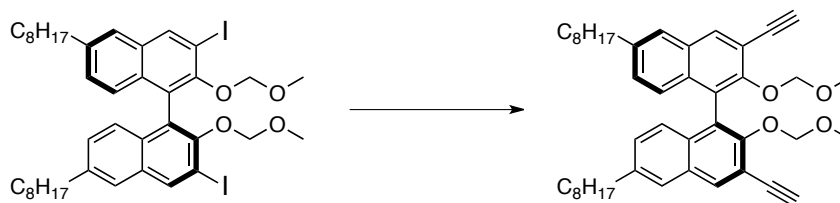

To a magnetically stirred solution of (*S*)-3,3'-diiodo-2,2'-bis(methoxymethyl)-6,6'-dioctyl-1,1'-binaphthalene (**S2**, 18.22 g, 21.42 mmol) in toluene (110 mL) and Et<sub>3</sub>N (110 mL) were added bis(triphenylphosphine)palladium (II) dichloride (0.601 g, 0.857 mmol) and copper (I) bromide (1.63 g, 8.57 mmol). After degassing this solution under vacuum (3 x 30 s), trimethylsilylacetylene (9.76 mL, 68.54 mmol) was added. The reaction mixture was stirred at 50 °C for 12 h at which point TLC indicated complete consumption of the starting material. After cooling to room temperature, the reaction mixture was diluted with Et<sub>2</sub>O (150 mL), filtered through Celite and concentrated *in vacuo*. The crude residue was taken up in MeOH (455 mL) and DCM (45 mL). To this vigorously-stirred solution was added K<sub>2</sub>CO<sub>3</sub> (29.6 g, 214.2 mmol). The reaction mixture was stirred at room temperature for 1 h at which point TLC indicated consumption of the starting material. The reaction mixture was filtered through Celite and the filtrate partitioned between H<sub>2</sub>O (200 mL) and DCM (200 mL). The organic phase was separated and the aqueous phase was extracted with DCM (3 x 50 mL). The combined organic extracts were washed with saturated aqueous NH<sub>4</sub>Cl, dried (Na<sub>2</sub>SO<sub>4</sub>), and concentrated *in vacuo*. The residue was purified by column chromatography on silica gel using Hex/Et<sub>2</sub>O as eluent (20:1) to give the title compound (10.15 g, 15.64 mmol, 73 % yield over 2 steps) as a viscous, brown oil. <sup>1</sup>H NMR (500 MHz, CDCl<sub>3</sub>) δ 8.14 (s, 2H), 7.61 (s, 2H), 7.19 (d, *J* = 9.0 Hz, 2H), 7.16 (d, *J* = 9.0 Hz, 2H), 5.09 (d, *J* = 6.0 Hz, 2H), 4.90 (d, *J* = 6.0 Hz, 2H), 3.34 (s, 2H), 2.74 (t, *J* = 7.8 Hz, 4H), 2.57 (s, 6H), 1.72 - 1.63 (m, 4H), 1.45 - 1.21 (m, 20H), 0.90 (t, *J* = 6.8 Hz, 6H). <sup>13</sup>C NMR (126 MHz, CDCl<sub>3</sub>) δ 152.66, 140.24,



134.64, 132.41, 130.32, 129.15, 126.40, 125.87, 125.74, 116.04, 98.84, 81.30, 80.82, 56.06, 35.83, 31.89, 31.14, 29.48, 29.36, 29.28, 22.69, 14.13. HRMS (EI) found  $[M]^+$  646.4031,  $C_{44}H_{54}O_4$  requires 646.4022.

#### **General Procedure A: Synthesis of triazolyl diols S1a-c and S1g-l:**

To a magnetically stirred solution of *bis*-alkyne **8** (1.0 equiv) in DMF (0.05 M) were added copper (I) bromide (0.25 equiv.),  $Et_3N$  (2.0 equiv.),  $H_2O$  (4.0 equiv), and azide **S3** (2.2 equiv.). The reaction mixture was degassed under vacuum (3 X 30 s), and then heated for 12 h at 100 °C under an atmosphere of  $N_2$ . Upon complete consumption of the starting material, as judged by TLC, the reaction mixture was allowed to cool to room temperature and diluted with saturated aqueous  $NH_4Cl$ . The aqueous layer was extracted with ethyl acetate (x3) and the combined organic extracts were washed with  $H_2O$  (x4), dried ( $Na_2SO_4$ ) and concentrated *in vacuo*. The crude residue was dissolved in 1,4-dioxane (0.05 M), concentrated HCl (2 mL) was added, and the mixture was heated at 70 °C. Upon complete consumption of the starting material as judged by TLC, the reaction mixture was allowed to cool to room temperature and then concentrated *in vacuo*. The residue was partitioned between DCM and saturated aqueous  $NaHCO_3$ . The aqueous layer was extracted with DCM (x3) and the combined organics were dried ( $Na_2SO_4$ ) and concentrated *in vacuo*. The crude residue was purified by column chromatography (EtOAc/Hex).

#### **General Procedure B: Synthesis of triazolyl diols S1d-f:**

**i. Preparation of azides:** To a magnetically stirred solution of sodium azide (3.2 equiv.) and copper sulfate pentahydrate (0.3 equiv.) in MeOH (0.4 M) was added the appropriate boronic acid (3 equiv.). The brown suspension was stirred at room temperature for 3 h under air and then diluted with EtOAc and saturated aqueous sodium bicarbonate. The organic layer was separated and the aqueous layer was extracted with EtOAc (3x). The combined organic layers were concentrated *in vacuo* to furnish a crude oil, which was directly taken forward in the next step without further purification.

**ii. Copper Catalyzed Alkyne-Azide Cycloaddition (CuAAC):** The crude azide **S3** was dissolved in DCM and transferred to a magnetically stirred solution of *bis*-alkyne **8** (1.0 equiv) in DCM/ $H_2O$  (1:1, v/v, 0.05 M). Then  $CuSO_4 \cdot 5H_2O$  (0.3 equiv.) and sodium ascorbate (1 equiv.) were successively added and the mixture was stirred at room temperature under an atmosphere of  $N_2$ . Every 24 h, sodium ascorbate (0.5 equiv.) was added until complete disappearance of *bis*-alkyne and mono-triazole product as judged by TLC (EtOAc/Hex). The reaction mixture was diluted with DCM, washed with saturated aqueous sodium bicarbonate and extracted with EtOAc (x3). The combined organic extracts were washed with brine, dried ( $Na_2SO_4$ ) and concentrated *in vacuo*. The crude residue was purified by flash column chromatography using EtOAc/Hex as eluent.

**iii. MOM Deprotection:** To a magnetically stirred solution of MOM-protected intermediate **S1-i** in 1,4-dioxane (0.025 M) was added concentrated HCl (2 mL) and the mixture was stirred at room temperature overnight. Upon complete consumption of the starting material, as judged by TLC, the reaction mixture was concentrated *in vacuo*. The residue was partitioned between DCM and saturated aqueous NaHCO<sub>3</sub>. The aqueous layer was extracted with DCM (x3) and the combined organic layers were dried (Na<sub>2</sub>SO<sub>4</sub>) and concentrated *in vacuo*. The crude residue was purified by column chromatography using EtOAc/Hex as eluent or by recrystallization from CHCl<sub>3</sub>/Hex.

**General Procedure C: Synthesis of phosphoric acids:**

To a magnetically stirred solution of triazolyl diol **S1** in pyridine (0.05 M) was added phosphorus (V) oxychloride (2.0 equiv.) and the reaction mixture was heated at 95 °C under an atmosphere of N<sub>2</sub>. Upon complete consumption of the starting material, as judged by TLC, the reaction mixture was allowed to cool to room temperature. H<sub>2</sub>O (5 mL) was added and the mixture was stirred at 100 °C. Upon complete consumption of the intermediate, as judged by TLC, the reaction mixture was diluted with DCM (20 mL) and washed with 3N HCl (3 x 20 mL). The combined organic extracts were dried (Na<sub>2</sub>SO<sub>4</sub>) and concentrated *in vacuo*. The crude residue was purified by column chromatography (DCM/MeOH or EtOAc/Hex/TFA).

**(S)-3,3'-bis(1-benzyl-1H-1,2,3-triazol-4-yl)-6,6'-dioctyl-[1,1'-binaphthalene]-2,2'-diol (S1a)**

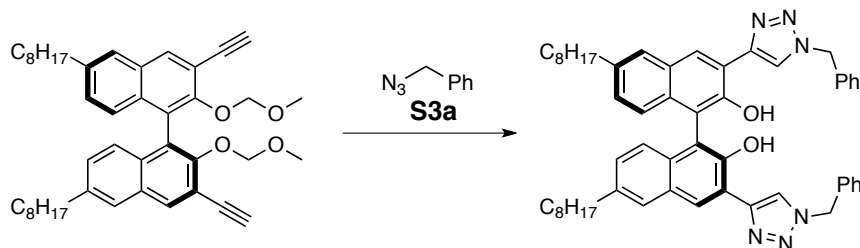

Subjection of *bis*-alkyne **8** (0.636 g, 0.980 mmol) and azide **S3a** (0.287 g, 2.16 mmol) to General Procedure A gave the title compound (0.597 g, 0.724 mmol, 74 % yield) as a yellow solid after purification by column chromatography on silica gel using Hex:EtOAc as eluent (3:2). <sup>1</sup>H NMR (500 MHz, CDCl<sub>3</sub>) δ 9.98 (s, 2H), 8.16 (s, 2H), 8.00 (s, 2H), 7.58 (s, 2H), 7.44 - 7.35 (m, 6H), 7.35 - 7.25 (m, 4H), 7.17 (d, *J* = 8.5 Hz, 2H), 7.10 (d, *J* = 8.5 Hz, 2H), 5.54 (s, 4H), 2.69 (t, *J* = 7.7 Hz, 4H), 1.75 - 1.61 (m, 4H), 1.43 - 1.15 (m, 20H), 0.91 (t, *J* = 6.7 Hz, 6H). <sup>13</sup>C NMR (126 MHz, CDCl<sub>3</sub>) δ 150.27, 147.20, 138.09, 134.39, 132.31, 129.18, 128.86, 128.71, 128.53, 128.14, 126.55, 125.81, 124.72, 120.84, 116.93, 116.56, 54.44, 35.85, 31.94, 31.31, 29.56, 29.46, 29.32, 22.71, 14.16. HRMS (ESI) found [M+H]<sup>+</sup> 825.4856, C<sub>54</sub>H<sub>61</sub>N<sub>6</sub>O<sub>2</sub> requires 825.4851.

**(4*R*,11*bS*)-2,6-bis(1-benzyl-1*H*-1,2,3-triazol-4-yl)-4-hydroxy-9,14-dioctyldinaphtho[2,1-*d*:1',2'-*f*][1,3,2]dioxaphosphepine 4-oxide (9a)**

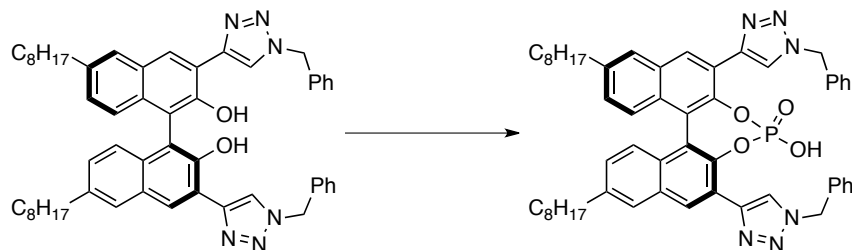

Subjection of diol **S1a** (0.500 g, 0.606 mmol) to General Procedure C gave the title compound (0.498 g, 0.561 mmol, 93 % yield) as a yellow solid after purification by column chromatography on silica gel using DCM/MeOH as eluent (20:1 to 10:1). <sup>1</sup>H NMR (500 MHz, CDCl<sub>3</sub>: DMSO, 1:1) δ 8.82 (s, 2H), 8.72 (s, 2H), 7.94 (s, 2H), 7.30 - 7.23 (m, 8H), 7.18 (d, *J* = 8.7 Hz, 4H), 7.05 (d, *J* = 8.6 Hz, 2H), 5.70 (d, *J* = 15.5 Hz, 2H), 5.65 (d, *J* = 16.0 Hz, 2H), 2.71 (t, *J* = 7.6 Hz, 4H), 1.80 - 1.56 (m, 4H), 1.40 - 1.14 (m, 20H), 0.82 (t, *J* = 6.7 Hz, 6H). <sup>13</sup>C NMR (126 MHz, CDCl<sub>3</sub>: DMSO, 1:1) δ 144.20 (d, *J* = 8.9 Hz), 142.18, 140.34, 136.16, 131.31, 130.25, 128.86, 128.50, 128.14, 127.90, 127.54, 127.17, 126.52, 124.96, 123.24, 122.73, 53.23, 35.63, 31.80, 31.11, 29.39, 29.29, 29.18, 22.61, 14.34. <sup>31</sup>P NMR (243 MHz, CDCl<sub>3</sub>: DMSO, 1:1) δ 0.95. HRMS (ESI) found [M-H]<sup>-</sup> 885.4252, C<sub>54</sub>H<sub>58</sub>N<sub>6</sub>O<sub>4</sub>P<sub>1</sub> requires 885.4263.

**(*S*)-3,3'-bis(1-benzhydryl-1*H*-1,2,3-triazol-4-yl)-6,6'-dioctyl-[1,1'-binaphthalene]-2,2'-diol (**S1b**)**

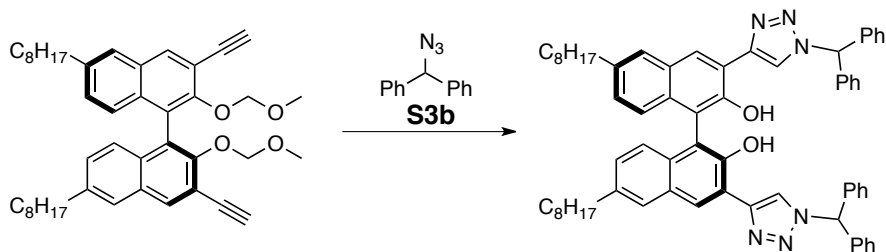

Subjection of *bis*-alkyne **8** (0.500 g, 0.771 mmol) and azide **S3b** (0.354 g, 1.69 mmol) to General Procedure A gave the title compound (0.390 g, 0.399 mmol, 52 % yield) as a yellow solid after purification by column chromatography on silica gel using Hex/EtOAc as eluent (9:1). <sup>1</sup>H NMR (500 MHz, CDCl<sub>3</sub>) δ 9.76 (s, 2H), 8.29 (s, 2H), 8.02 (s, 2H), 7.65 (s, 2H), 7.53 - 7.33 (m, 12H), 7.30 - 7.16 (m, 12H), 7.13 (d, *J* = 8.5 Hz, 2H), 2.73 (t, *J* = 7.2 Hz, 4H), 1.79 - 1.57 (m, 4H), 1.50 - 1.19 (m, 20H), 0.93 (t, *J* = 6.3 Hz, 6H). <sup>13</sup>C NMR (126 MHz, CDCl<sub>3</sub>) δ 150.26, 146.62, 138.13, 137.81, 132.38, 129.12, 129.10, 128.84, 128.80, 128.61, 128.23, 128.14, 126.57, 125.93, 124.75, 121.07, 117.10, 116.44,

68.54, 35.87, 31.97, 31.29, 29.59, 29.43, 29.34, 22.75, 14.21. **HRMS** (ESI) found  $[M+H]^+$  977.5475,  $C_{66}H_{69}N_6O_2$  requires 977.5477.

**(4*R*,11*bS*)-2,6-bis(1-benzhydryl-1*H*-1,2,3-triazol-4-yl)-4-hydroxy-9,14-dioctyldinaphtho[2,1-*d*:1',2'-*f*][1,3,2]dioxaphosphepine 4-oxide (9b)**

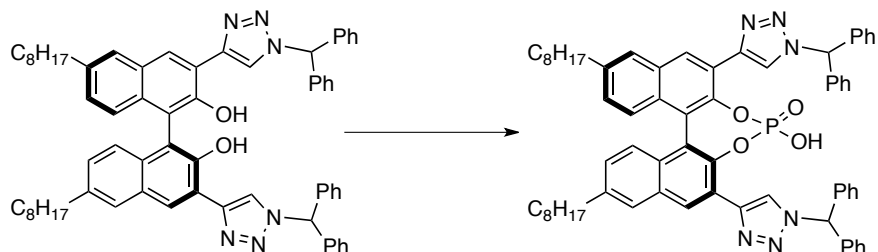

Subjection of diol **S1b** (0.380 g, 0.388 mmol) to General Procedure C gave the title compound (0.351 g, 0.338 mmol, 87 % yield) as a yellow solid after purification by column chromatography on silica gel using DCM/MeOH as eluent (20:1 to 10:1). **<sup>1</sup>H NMR** (500 MHz, DMSO, 1:1)  $\delta$  8.78 (s, 2H), 8.68 (s, 2H), 7.94 (s, 2H), 7.46 (s, 2H), 7.42 - 7.11 (m, 20H), 7.06 (d,  $J = 8.8$  Hz, 2H), 2.85 - 2.62 (m, 4H), 1.76 - 1.55 (m, 4H), 1.39 - 1.09 (m, 20H), 0.83 (t,  $J = 6.7$  Hz, 6H). **<sup>13</sup>C NMR** (151 MHz, DMSO)  $\delta$  144.79(d,  $J = 10.0$  Hz), 140.12, 139.30, 139.15, 131.12, 130.25, 129.07, 128.63, 128.54, 128.44, 128.24, 127.55, 127.46, 127.40, 126.34, 125.28, 123.49, 123.48, 122.77, 122.75, 66.92, 35.35, 31.67, 30.93, 29.24, 29.13, 29.06, 22.49, 14.35. **<sup>31</sup>P NMR** (202 MHz, DMSO)  $\delta$  2.37. **HRMS** (ESI) found  $[M+H]^+$  1039.5036,  $C_{66}H_{68}N_6O_4P_1$  requires 1039.5034.

**(*S*)-3,3'-bis(1-(di(naphthalen-1-yl)methyl)-1*H*-1,2,3-triazol-4-yl)-6,6'-dioctyl-[1,1'-binaphthalene]-2,2'-diol (S1c)**

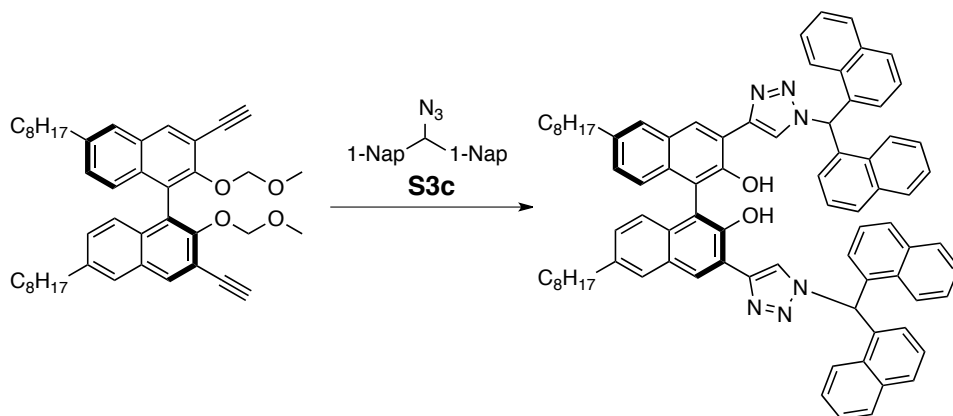

Subjection of *bis*-alkyne **8** (0.500 g, 0.771 mmol) and azide **S3c** (0.524 g, 1.69 mmol) to General Procedure A gave the title compound (0.706 g, 0.600 mmol, 78 % yield) as a brown solid after purification by column chromatography on silica gel using Hex/EtOAc

as eluent (4:1).  $^1\text{H NMR}$  (500 MHz,  $\text{CDCl}_3$ )  $\delta$  9.84 (s, 2H), 8.71 (s, 2H), 8.21 (s, 2H), 8.04 - 7.85 (m, 14H), 7.62 - 7.54 (m, 6H), 7.54 - 7.47 (m, 4H), 7.44 (app t,  $J = 7.2$  Hz, 4H), 7.16 (d,  $J = 8.4$  Hz, 2H), 7.10 (d,  $J = 8.5$  Hz, 2H), 7.03 (dd,  $J = 16.2, 7.0$  Hz, 4H), 2.70 (t,  $J = 7.2$  Hz, 4H), 1.76 - 1.61 (m, 4H), 1.45 - 1.24 (m, 20H), 0.94 (t,  $J = 6.7$  Hz, 6H).  $^{13}\text{C NMR}$  (126 MHz,  $\text{CDCl}_3$ )  $\delta$  150.21, 146.61, 138.08, 134.06, 134.04, 133.31, 133.28, 132.39, 130.72, 130.67, 129.99, 129.95, 129.19, 129.17, 128.80, 128.54, 127.55, 127.52, 126.49, 126.46, 126.44, 126.39, 126.23, 125.90, 125.44, 124.71, 122.82, 121.89, 116.95, 116.51, 62.75, 35.84, 31.97, 31.24, 29.58, 29.38, 29.33, 22.75, 14.21. **HRMS** (ESI) found  $[\text{M}+\text{H}]^+$  1176.6118,  $\text{C}_{82}\text{H}_{77}\text{N}_6\text{O}_4$  requires 1177.6103.

**(4*R*,11*bS*)-2,6-bis(1-(di(naphthalen-1-yl)methyl)-1*H*-1,2,3-triazol-4-yl)-4-hydroxy-9,14-dioctyldinaphtho[2,1-*d*:1',2'-*f*][1,3,2]dioxaphosphine 4-oxide (9c)**

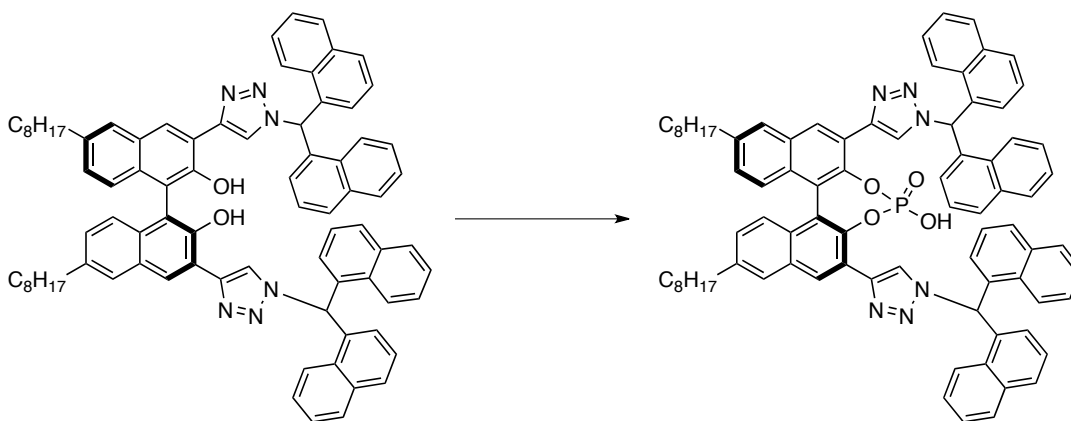

Subjection of diol **S1c** (0.280 g, 0.236 mmol) to General Procedure C gave the title compound (0.132 g, 0.106 mmol, 45 % yield) as a beige solid after purification by column chromatography on silica gel using DCM/MeOH as eluent (20:1).  $^1\text{H NMR}$  (500 MHz,  $\text{CDCl}_3$ : DMSO, 1:1)  $\delta$  8.76 (s, 2H), 8.49 (s, 2H), 8.02 (d,  $J = 6.3$  Hz, 2H), 7.99 - 7.81 (m, 10H), 7.76 (s, 2H), 7.56 - 7.44 (m, 6H), 7.40 (app t,  $J = 6.9$  Hz, 4H), 7.35 (app t,  $J = 7.2$  Hz, 2H), 7.08 (app s, 4H), 7.06 - 6.92 (m, 4H), 2.69 (t,  $J = 7.7$  Hz, 4H), 1.72 - 1.55 (m, 4H), 1.37 - 1.15 (m, 20H), 0.84 (t,  $J = 6.5$  Hz, 6H).  $^{13}\text{C NMR}$  (126 MHz,  $\text{CDCl}_3$ : DMSO, 1:1)  $\delta$  143.73 (d,  $J = 9.9$  Hz), 142.08, 140.60, 134.31, 133.94, 133.87, 131.39, 130.76, 130.57, 130.24, 129.69, 129.37, 129.17, 129.14, 129.00, 128.64, 127.99, 127.49, 127.24, 127.11, 126.82, 126.54, 126.45, 126.33, 126.18, 125.69, 125.68, 125.34, 123.30, 123.04, 122.88, 122.59, 61.75, 35.65, 31.80, 31.06, 29.38, 29.28, 29.20, 22.62, 14.31.  $^{31}\text{P NMR}$  (202 MHz,  $\text{CDCl}_3$ : DMSO, 1:1)  $\delta$  1.35. **HRMS** (ESI) found  $[\text{M}-\text{H}]^-$  1237.5513,  $\text{C}_{82}\text{H}_{74}\text{N}_6\text{O}_4\text{P}_1$  requires 1237.5515.

**(S)-3,3'-bis(1-(naphthalen-1-yl)-1*H*-1,2,3-triazol-4-yl)-6,6'-dioctyl-[1,1'-binaphthalene]-2,2'-diol (S1d)**

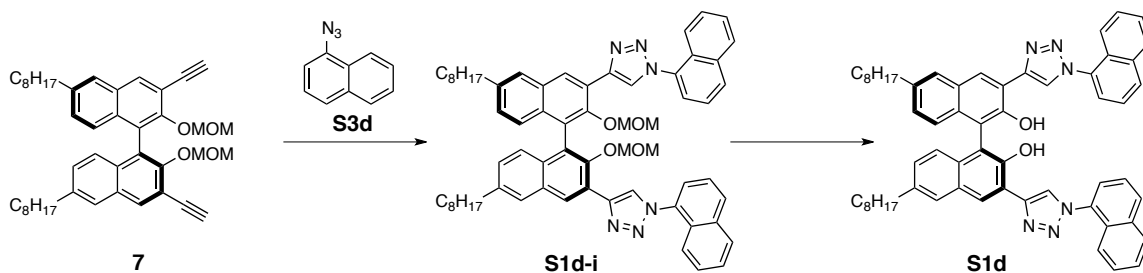

Subjection of *bis*-alkyne **8** (0.500 g, 0.773 mmol) to General Procedure Bi-Bii, gave intermediate **S1d-i** (0.585 g, 0.594 mmol, 77 % yield) as an orange solid after purification by column chromatography on silica gel using Hex/Et<sub>2</sub>O as eluent (5:2). <sup>1</sup>H NMR (400 MHz, CDCl<sub>3</sub>) δ 9.04 (s, 2H), 8.71 (s, 2H), 8.02 (d, *J* = 7.6 Hz, 2H), 7.96 (d, *J* = 7.6 Hz, 2H), 7.83 (s, 2H), 7.79 (d, *J* = 7.6 Hz, 2H), 7.65 (d, *J* = 7.2 Hz, 2H), 7.60 – 7.52 (m, 6H), 7.26 (d, *J* = 7.6 Hz, 2H), 7.21 (d, *J* = 7.6 Hz, 2H), 4.67 (d, *J* = 4.8 Hz, 2H), 4.45 (d, *J* = 4.8 Hz, 2H), 2.78 (t, *J* = 7.8 Hz, 4H), 2.69 (s, 6H), 1.76-1.69 (m, 4H), 1.43-1.21 (m, 20H), 0.88 (t, *J* = 6.7 Hz, 6H).

Subjection of **S1d-i** (0.530 g, 0.538 mmol) to General Procedure Biii gave the title compound (0.480 g, 0.535 mmol, 99 % yield) as a brown solid after purification by column chromatography on silica gel using EtOAc/Hex as eluent (0 to 40 %). <sup>1</sup>H NMR (500 MHz, CDCl<sub>3</sub>) δ 9.45 (s, 2H), 8.49 (d, *J* = 11.8 Hz, 4H), 8.05 (d, *J* = 8.2 Hz, 2H), 7.98 (d, *J* = 7.5 Hz, 2H), 7.74 (d, *J* = 8.1 Hz, 2H), 7.70 (s, 2H), 7.65 (d, *J* = 7.0 Hz, 2H), 7.63 - 7.53 (m, 6H), 7.26 (d, *J* = 8.5 Hz, 2H), 7.17 (d, *J* = 8.8 Hz, 2H), 2.75 (t, *J* = 7.7 Hz, 4H), 1.79 - 1.64 (m, 4H), 1.54 - 1.14 (m, 20H), 0.92 (t, *J* = 6.7 Hz, 6H). <sup>13</sup>C NMR (126 MHz, CDCl<sub>3</sub>) δ 150.20, 146.34, 138.38, 134.17, 133.48, 132.40, 130.66, 128.96, 128.81, 128.46, 128.34, 128.09, 127.19, 126.78, 126.45, 125.04, 124.75, 123.92, 123.71, 122.29, 117.13, 116.10, 35.91, 31.96, 31.36, 29.59, 29.50, 29.35, 22.73, 14.18. HRMS (ESI) found [M+H]<sup>+</sup> 897.4861, C<sub>60</sub>H<sub>61</sub>N<sub>6</sub>O<sub>2</sub> requires 897.4851.

**(4*R*,11*bS*)-4-hydroxy-2,6-bis(1-(naphthalen-1-yl)-1*H*-1,2,3-triazol-4-yl)-9,14-dioctyldinaphtho[2,1-*d*:1',2'-*f*][1,3,2]dioxaphosphepine 4-oxide (9d)**

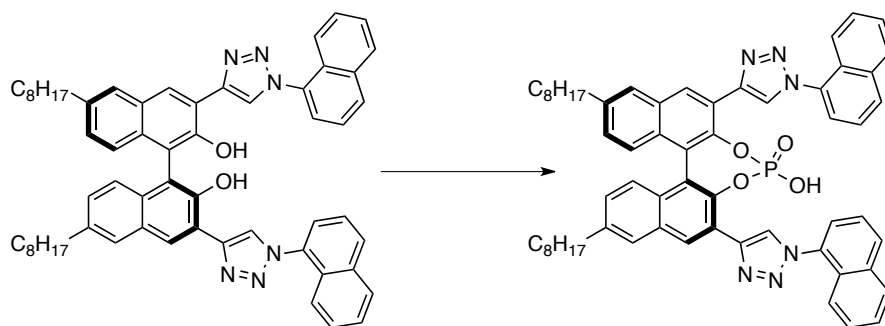

**S14**

Subjection of diol **S1d** (0.090 g, 0.100 mmol) to General Procedure C gave the title compound (0.041 g, 0.043 mmol, 43 % yield) as a yellow solid after purification by column chromatography on silica gel using DCM/MeOH as eluent (20:1).  $^1\text{H NMR}$  (500 MHz, DMSO)  $\delta$  9.15 (s, 2H), 8.82 (s, 2H), 8.22 (d,  $J = 8.2$  Hz, 2H), 8.14 (d,  $J = 8.1$  Hz, 2H), 7.98 (s, 2H), 7.81 (d,  $J = 7.1$  Hz, 2H), 7.73 (app t,  $J = 7.7$  Hz, 2H), 7.70 - 7.63 (m, 4H), 7.63 - 7.43 (m, 2H), 7.22 (d,  $J = 8.9$  Hz, 2H), 7.12 (d,  $J = 8.7$  Hz, 2H), 2.76 (t,  $J = 7.6$  Hz, 4H), 1.81 - 1.59 (m, 4H), 1.44 - 1.15 (m, 20H), 0.86 (t,  $J = 6.6$  Hz, 6H).  $^{13}\text{C NMR}$  (126 MHz, DMSO)  $\delta$  164.54, 145.99, 145.96, 139.85, 134.08, 133.78, 130.91, 130.71, 130.41, 128.55, 128.27, 128.16, 128.10, 127.59, 127.30, 127.02, 126.63, 125.43, 123.74, 123.64, 123.18, 122.67, 35.70, 31.84, 31.21, 29.44, 29.38, 29.26, 22.66, 14.37.  $^{31}\text{P NMR}$  (162 MHz, DMSO)  $\delta$  4.52. **HRMS** (ESI) found  $[\text{M-H}]^-$  957.4247,  $\text{C}_{60}\text{H}_{58}\text{N}_6\text{O}_4\text{P}_1$  requires 957.4263.

**(S)-3,3'-bis(1-(anthracen-9-yl)-1H-1,2,3-triazol-4-yl)-6,6'-dioctyl-[1,1'-binaphthalene]-2,2'-diol (S1e)**

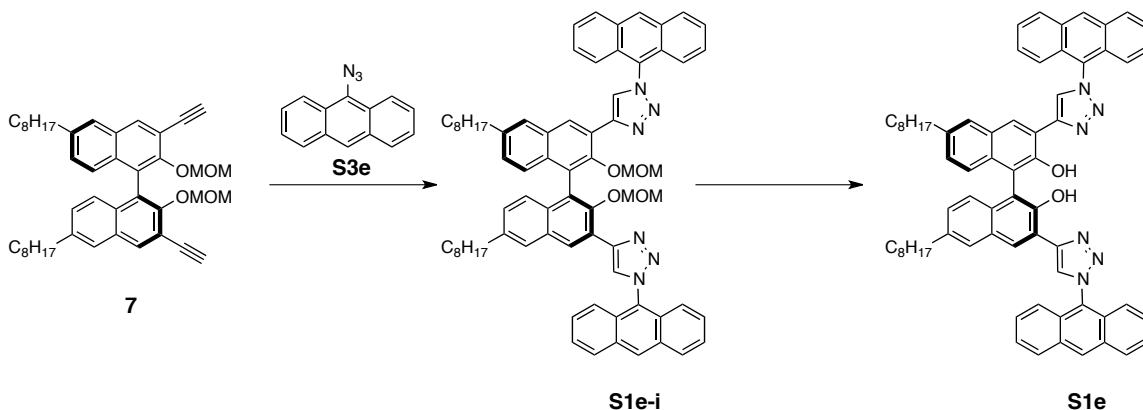

Subjection of *bis*-alkyne **8** (0.500 g, 0.773 mmol) to General Procedure Bi-Bii, gave intermediate **S1e-i** (0.639 g, 0.589 mmol, 76 % yield) as a yellow solid after purification by flash column chromatography on silica gel using EtOAc/Hex as eluent (0 to 25 %).  $^1\text{H NMR}$  (400 MHz,  $\text{CDCl}_3$ )  $\delta$  9.11 (s, 2H), 8.72 (s, 2H), 8.66 (s, 2H), 8.15 - 7.99 (m, 4H), 7.85 (s, 2H), 7.57 - 7.38 (m, 12H), 7.30 (d,  $J = 8.8$  Hz, 2H), 7.22 (d,  $J = 8.8$  Hz, 2H), 4.67 (d,  $J = 5.1$  Hz, 2H), 4.50 (d,  $J = 5.1$  Hz, 2H), 2.79 (t,  $J = 7.7$  Hz, 4H), 2.67 (s, 6H), 1.81 - 1.67 (m, 4H), 1.49 - 1.20 (m, 20H), 0.88 (t,  $J = 6.8$  Hz, 6H).

Subjection of **S1e-i** (0.300 g, 0.276 mmol) to General Procedure Biii gave the title compound (0.273 g, 0.274 mmol, 99 %) as an orange solid after recrystallization from  $\text{CHCl}_3/\text{Hex}$ .  $^1\text{H NMR}$  (300 MHz,  $\text{CDCl}_3$ )  $\delta$  9.47 (s, 2H), 8.73 (s, 2H), 8.58 (s, 2H), 8.56 (s, 2H), 8.20 - 8.08 (m, 4H), 7.71 (d,  $J = 1.4$  Hz, 2H), 7.65 - 7.51 (m, 8H), 7.45 (dd,  $J = 10.3, 7.2$  Hz, 4H), 7.29 (d,  $J = 8.4$  Hz, 2H), 7.19 (d,  $J = 8.4$  Hz, 2H), 2.74 (t,  $J = 7.7$  Hz,

4H), 1.82 - 1.61 (m, 4H), 1.46 - 1.18 (m, 20H), 0.86 (t,  $J = 6.0$  Hz, 6H).  $^{13}\text{C}$  NMR (151 MHz,  $\text{CDCl}_3$ )  $\delta$  150.26, 146.55, 138.40, 132.48, 131.11, 130.04, 129.01, 128.83, 128.40, 128.28, 128.21, 127.96, 126.72, 126.48, 126.02, 125.61, 124.78, 121.97, 117.11, 116.21, 35.86, 31.89, 31.28, 29.52, 29.41, 29.27, 22.66, 14.10. HRMS (ESI) found  $[\text{M-H}]^-$  997.5184,  $\text{C}_{68}\text{H}_{65}\text{N}_6\text{O}_2$  requires 997.5164.

**(4*R*,11*bS*)-2,6-bis(1-(anthracen-9-yl)-1*H*-1,2,3-triazol-4-yl)-4-hydroxy-9,14-dioctyldinaphtho[2,1-*d*:1',2'-*f*][1,3,2]dioxaphosphepine 4-oxide (9e)**

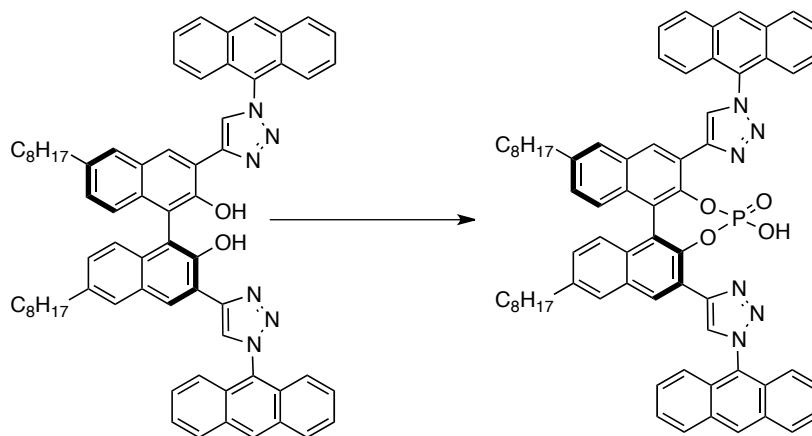

Subjection of diol **S1e** (0.150 g, 0.150 mmol) to General Procedure C gave the title compound (0.136 g, 0.128 mmol, 85 % yield) as a yellow solid after purification by column chromatography on silica gel using DCM/MeOH as eluent (30:1 to 20:1).  $^1\text{H}$  NMR (600 MHz, DMSO)  $\delta$  9.04 (s, 2H), 8.98 (d,  $J = 10.1$  Hz, 4H), 8.26 (d,  $J = 8.3$  Hz, 4H), 8.03 (s, 2H), 7.67 - 7.51 (m, 8H), 7.38 (d,  $J = 8.8$  Hz, 2H), 7.34 (d,  $J = 8.6$  Hz, 2H), 7.26 (d,  $J = 8.7$  Hz, 2H), 7.20 (d,  $J = 8.6$  Hz, 2H), 2.75 (t,  $J = 7.5$  Hz, 4H), 1.77 - 1.58 (m, 4H), 1.42 - 1.10 (m, 20H), 0.83 (t,  $J = 6.6$  Hz, 6H).  $^{13}\text{C}$  NMR (151 MHz, DMSO)  $\delta$  144.78 (d,  $J = 9.5$  Hz), 142.44, 139.86, 130.86, 130.69, 130.13, 129.98, 128.71, 128.55, 128.46, 128.40, 127.81, 127.78, 127.59, 127.11, 126.16, 126.06, 122.95, 122.57, 121.61, 54.90, 35.00, 31.28, 30.57, 28.87, 28.76, 28.69, 22.10, 13.93.  $^{31}\text{P}$  NMR (162 MHz, DMSO)  $\delta$  2.93. HRMS (ESI) found  $[\text{M-H}]^-$  1057.4543,  $\text{C}_{68}\text{H}_{62}\text{N}_6\text{O}_2\text{P}$  requires 1057.4552.



**(S)-6,6'-dioctyl-3,3'-bis(1-(pyren-2-yl)-1*H*-1,2,3-triazol-4-yl)-[1,1'-binaphthalene]-2,2'-diol (S1f)**

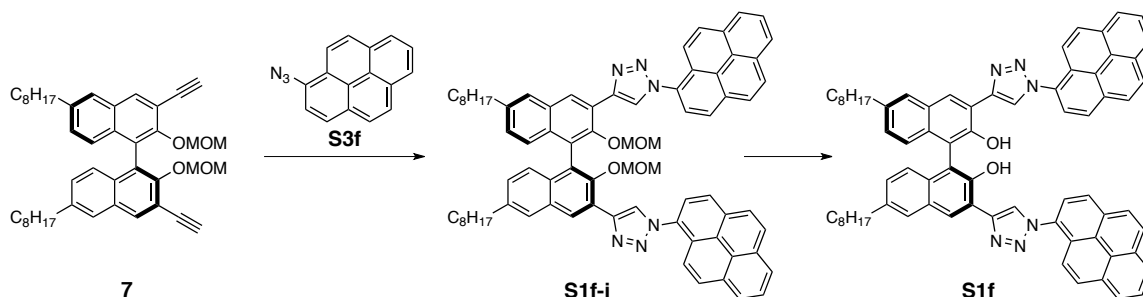

Subjection of *bis*-alkyne **8** (0.200 g, 0.309 mmol) to General Procedure Bi-Bii, gave intermediate **S1f-i** (0.235 g, 0.207 mmol, 67 % yield) as a dark green solid after purification by column chromatography on silica gel using Et<sub>2</sub>O/Hex as eluent (0 to 50 %). <sup>1</sup>H NMR (400 MHz, CDCl<sub>3</sub>) δ 9.09 (s, 2H), 8.87 (s, 2H), 8.34 - 8.25 (m, 4H), 8.25 - 8.19 (m, 2H), 8.18 (s, 2H), 8.16 - 8.10 (m, 6H), 8.10 - 7.99 (m, 4H), 7.86 (s, 2H), 7.30 (d, *J* = 8.8 Hz, 2H), 7.23 (d, *J* = 8.8 Hz, 2H), 4.73 (d, *J* = 5.0 Hz, 2H), 4.51 (d, *J* = 5.0 Hz, 2H), 2.80 (t, *J* = 7.6 Hz, 4H), 2.74 (s, 6H), 1.85 - 1.67 (m, 4H), 1.48 - 1.19 (m, 20H), 0.89 (t, *J* = 6.5 Hz, 6H).

Subjection of **S1f-i** (0.200 g, 0.176 mmol) to General Procedure Biii gave the title compound (0.183 g, 0.175 mmol, 99 % yield) as a green solid after purification by column chromatography on silica gel using EtOAc/Hex as eluent (0 to 40 %). <sup>1</sup>H NMR (300 MHz, CDCl<sub>3</sub>) δ 9.36 (s, 2H), 8.65 (s, 2H), 8.56 (s, 2H), 8.38 - 8.05 (m, 16H), 7.96 (d, *J* = 9.2 Hz, 2H), 7.72 (s, 2H), 7.27 (d, *J* = 8.7 Hz 2H), 7.18 (d, *J* = 8.7 Hz, 2H), 2.73 (t, *J* = 7.7 Hz, 4H), 1.79 - 1.62 (m, 4H), 1.44 - 1.14 (m, 20H), 0.86 (t, *J* = 6.4 Hz, 6H). <sup>13</sup>C NMR (126 MHz, CDCl<sub>3</sub>) δ 150.40, 146.50, 138.33, 132.54, 132.14, 130.90, 130.43, 129.92, 129.70, 128.95, 128.89, 126.86, 126.82, 126.66, 126.55, 126.37, 126.04, 125.83, 124.87, 124.76, 124.66, 124.31, 123.87, 123.17, 120.86, 117.23, 116.39, 35.95, 32.01, 31.41, 29.65, 29.60, 29.41, 22.78, 14.25. HRMS (ESI) found [M+H]<sup>+</sup> 1045.5168, C<sub>72</sub>H<sub>65</sub>N<sub>6</sub>O<sub>2</sub> requires 1045.5164.

**(4*R*,11*cS*)-2-(1-(4,6-dihydropyren-1-yl)-1*H*-1,2,3-triazol-4-yl)-4-hydroxy-9,14-dioctyl-6-(1-(pyren-1-yl)-1*H*-1,2,3-triazol-4-yl)dinaphtho[2,1-*d*:1',2'-*f*][1,3,2]dioxaphosphepine 4-oxide (9f)**

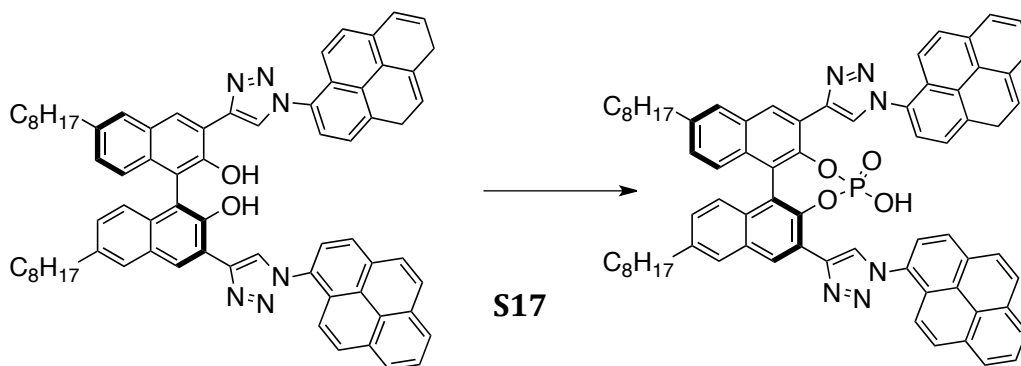

Subjection of diol **S1f** (0.150 g, 0.143 mmol) to General Procedure C gave the title compound (0.105 g, 0.095 mmol, 66 % yield) as a green solid after purification by column chromatography on silica gel using MeOH/DCM as eluent (0 to 5 %). **<sup>1</sup>H NMR** (400 MHz, DMSO)  $\delta$  9.28 (s, 2H), 8.90 (s, 2H), 8.50 (d,  $J = 7.6$  Hz, 2H), 8.44 (d,  $J = 7.4$  Hz, 2H), 8.41 - 8.22 (m, 10H), 8.16 (t,  $J = 7.6$  Hz, 2H), 8.02 (s, 2H), 7.96 (d,  $J = 9.3$  Hz, 2H), 7.26 (d,  $J = 8.7$  Hz, 2H), 7.17 (d,  $J = 8.7$  Hz, 2H), 2.78 (t,  $J = 7.5$  Hz, 4H), 1.85 - 1.60 (m, 4H), 1.47 - 1.14 (m, 20H), 0.86 (t,  $J = 5.8$  Hz, 6H). **<sup>13</sup>C NMR** (151 MHz, DMSO)  $\delta$  145.43 (d,  $J = 7.9$  Hz), 142.64, 139.45, 131.58, 130.59, 130.19, 130.02, 129.99, 129.70, 128.73, 128.15, 127.41, 126.99, 126.48, 126.07, 126.03, 125.14, 125.07, 124.00, 123.51, 123.19, 122.68, 120.76, 34.97, 31.25, 30.55, 28.84, 28.76, 28.66, 22.07, 13.93. **<sup>31</sup>P NMR** (162 MHz, DMSO)  $\delta$  4.13. **HRMS** (ESI) found  $[M-H]^-$  1105.4553,  $C_{72}H_{62}N_6O_4P$  requires 1105.4576.

**(S)-3,3'-Bis(1-mesityl-1*H*-1,2,3-triazol-4-yl)-6,6'-dioctyl-[1,1'-binaphthalene]-2,2'-diol (S1g)**

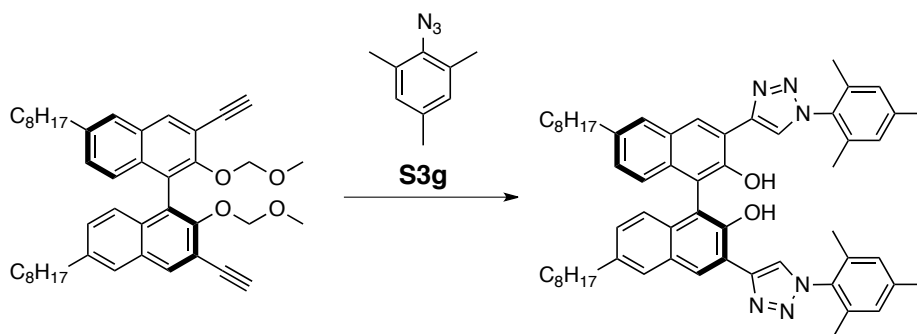

Subjection of *bis*-alkyne **8** (0.783 g, 1.20 mmol) and azide **S3g** (0.426 g, 2.64 mmol) to General Procedure A gave the title compound (0.157 g, 0.178 mmol, 15 % yield) as a yellow solid after purification by column chromatography on silica gel using Hex/EtOAc as eluent (4:1). **<sup>1</sup>H NMR** (500 MHz,  $CDCl_3$ )  $\delta$  9.69 (s, 2H), 8.43 (s, 2H), 8.21 (s, 2H), 7.70 (s, 2H), 7.22 (d,  $J = 8.5$  Hz, 2H), 7.16 (d,  $J = 8.5$  Hz, 2H), 7.06 (s, 4H), 2.81 - 2.67 (m, 4H), 2.41 (s, 6H), 2.07 (s, 12H), 1.79 - 1.64 (m, 4H), 1.42 - 1.21 (m, 20H), 0.89 (t,  $J = 6.6$  Hz, 6H). **<sup>13</sup>C NMR** (126 MHz,  $CDCl_3$ )  $\delta$  150.23, 146.58, 140.33, 138.27, 135.11, 133.28, 132.38, 129.20, 128.87, 128.68, 126.58, 126.04, 124.75, 122.85, 117.11, 116.34, 35.87, 31.92, 31.31, 29.55, 29.41, 29.31, 22.70, 21.21, 17.39, 14.14. **HRMS** (ESI) found  $[M+H]^+$  881.5472,  $C_{58}H_{69}O_2N_6$  requires 881.5477.

**(4*R*,11*bS*)-4-Hydroxy-2,6-bis(1-mesityl-1*H*-1,2,3-triazol-4-yl)-9,14-dioctyldinaphtho[2,1-*d*:1',2'-*f*][1,3,2]dioxaphosphepine 4-oxide (9*g*)**

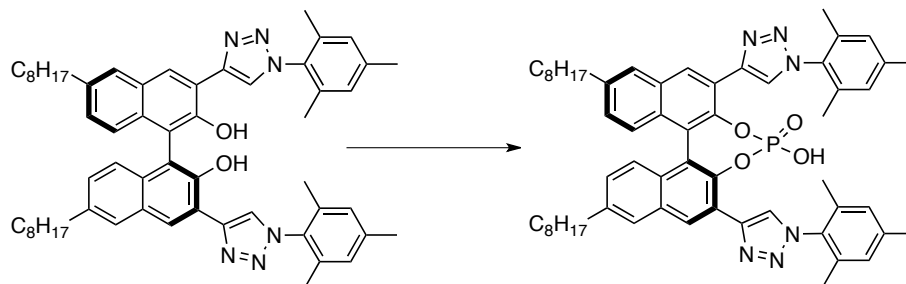

Subjection of diol **S1g** (0.143 g, 0.162 mmol) to General Procedure C gave the title compound (0.113 g, 0.119 mmol, 74 % yield) as a yellow solid after purification by column chromatography on silica gel using DCM/MeOH as eluent (20:1 to 10:1). **<sup>1</sup>H NMR** (400 MHz, CDCl<sub>3</sub>: DMSO, 1:1) δ 8.75 (s, 2H), 8.69 (s, 2H), 7.92 (s, 2H), 7.17 (d, *J* = 8.7 Hz, 2H), 7.10 (s, 4H), 7.06 (d, *J* = 8.5 Hz, 2H), 2.88 - 2.58 (m, 4H), 2.31 (s, 6H), 1.94 (s, 12H), 1.75 - 1.49 (m, 4H), 1.42 - 1.05 (m, 20H), 0.81 (t, *J* = 6.4 Hz, 6H). **<sup>13</sup>C NMR** (126 MHz, CDCl<sub>3</sub>: DMSO, 1:1) δ 145.57 (d, *J* = 8.9 Hz), 139.81, 139.74, 134.99, 133.78, 131.85, 131.02, 130.52, 129.18, 128.18, 127.36, 127.08, 126.59, 123.66, 123.04. **<sup>31</sup>P NMR** (162 MHz, CDCl<sub>3</sub>: DMSO, 1:1) δ 3.26. **HRMS** (ESI) found [M-H]<sup>-</sup> 941.4854, C<sub>58</sub>H<sub>66</sub>O<sub>4</sub>N<sub>6</sub>P<sub>1</sub> requires 941.4889.

**(*S*)-6,6'-Dioctyl-3,3'-bis(1-(2,4,6-triisopropylphenyl)-1*H*-1,2,3-triazol-4-yl)-[1,1'-binaphthalene]-2,2'-diol (S1*h*)**

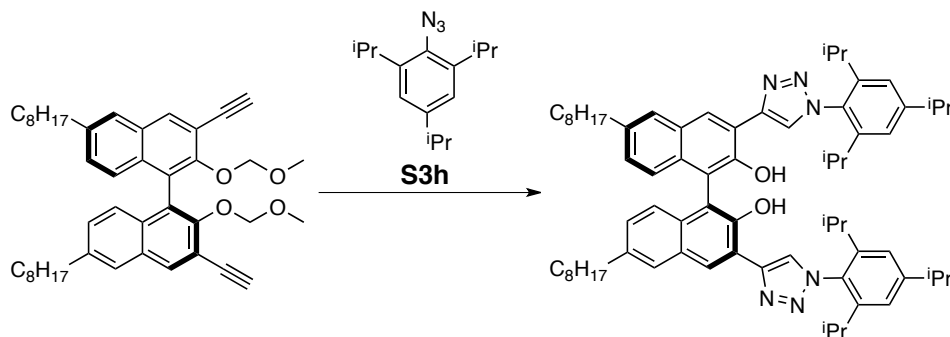

Subjection of *bis*-alkyne **8** (0.320 g, 0.494 mmol) and azide **S3h** (0.267 g, 1.09 mmol) to General Procedure A gave the title compound (0.328 g, 0.313 mmol, 63 % yield) as a yellow solid after purification by column chromatography on silica gel using Hex/EtOAc as eluent (4:1). **<sup>1</sup>H NMR** (500 MHz, CDCl<sub>3</sub>) δ 9.84 (s, 2H), 8.42 (s, 2H), 8.23 (s, 2H), 7.71 (s, 2H), 7.23 (d, *J* = 8.5 Hz, 2H), 7.19 (s, 4H), 7.16 (d, *J* = 8.5 Hz, 2H), 3.03 (sept, *J* = 7.0 Hz, 2H), 2.79 - 2.71 (m, 4H), 2.48 - 2.26 (m, 4H), 1.77 - 1.65 (m, 4H), 1.35 (d, *J* = 6.8 Hz, 24H), 1.31 (d, *J* = 6.8 Hz, 12H), 1.24 - 1.18 (m, 20H), 0.90 (t, *J* = 6.7 Hz, 6H). **<sup>13</sup>C NMR** (126 MHz, CDCl<sub>3</sub>) δ 151.81, 150.35, 146.48, 145.86, 145.77, 138.26, 132.49,

130.78, 128.88, 128.68, 126.59, 126.01, 124.81, 123.89, 121.90, 121.87, 117.10, 116.57, 35.91, 34.56, 31.95, 31.36, 29.58, 29.43, 29.33, 28.58, 28.55, 24.36, 24.31, 24.16, 24.05, 22.73, 14.18. **HRMS** (ESI) found  $[M+H]^+$  1049.7347,  $C_{70}H_{93}O_2N_6$  requires 1049.7355.

**(4R,11bS)-4-Hydroxy-9,14-dioctyl-2,6-bis(1-(2,4,6-triisopropylphenyl)-1H-1,2,3-triazol-4-yl)dinaphtho[2,1-d':1',2'-f][1,3,2]dioxaphosphepine 4-oxide (9h)**

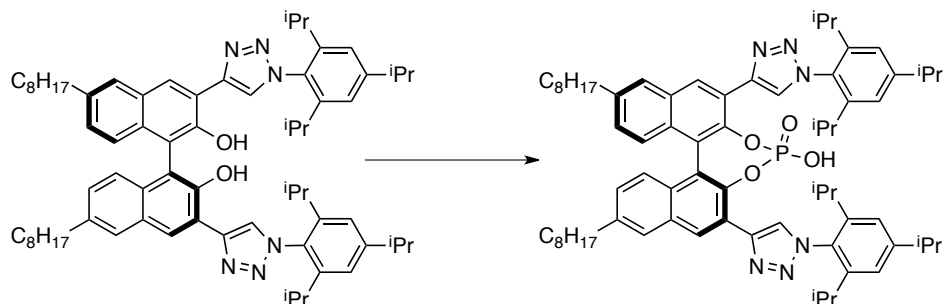

Subjection of diol **S1h** (0.230 g, 0.219 mmol) to General Procedure C gave the title compound (0.240 g, 0.216 mmol, 99 % yield) as an orange solid after purification by column chromatography on silica gel using Hex/EtOAc (1:1) with 1 % TFA as eluent. **<sup>1</sup>H NMR** (400 MHz, DMSO)  $\delta$  8.79 (s, 2H), 8.73 (s, 2H), 7.92 (s, 2H), 7.22 (s, 4H), 7.17 (d,  $J = 8.7$  Hz, 2H), 7.05 (d,  $J = 8.7$  Hz, 2H), 2.95 (sept,  $J = 6.8$  Hz, 2H), 2.81 - 2.66 (m, 4H), 2.35 - 2.20 (m, 2H), 2.20 - 2.07 (m, 2H), 1.81 - 1.50 (m, 4H), 1.46 - 1.16 (m, 26H), 1.16 - 0.91 (m, 20H), 0.81 (t,  $J = 6.5$  Hz, 6H). **<sup>13</sup>C NMR** (151 MHz, DMSO)  $\delta$  151.71 (d,  $J = 3.6$  Hz), 145.69, 145.59, 139.89, 131.24, 131.01, 130.44, 128.51, 128.34, 127.63, 127.39, 126.42, 123.58, 122.94, 122.07, 122.05, 35.38, 34.22, 31.68, 30.97, 29.26, 29.14, 29.09, 28.53, 28.45, 24.30, 24.26, 24.23, 24.14, 22.50, 14.35. **<sup>31</sup>P NMR** (162 MHz, DMSO)  $\delta$  4.20. **HRMS** (ESI) found  $[M+H]^+$  1111.6904,  $C_{70}H_{92}O_4N_6P_1$  requires 1111.6912.

**(S)-6,6'-Dioctyl-3,3'-bis(1-(2,4,6-tricyclohexylphenyl)-1H-1,2,3-triazol-4-yl)-[1,1'-binaphthalene]-2,2'-diol (S1i)**

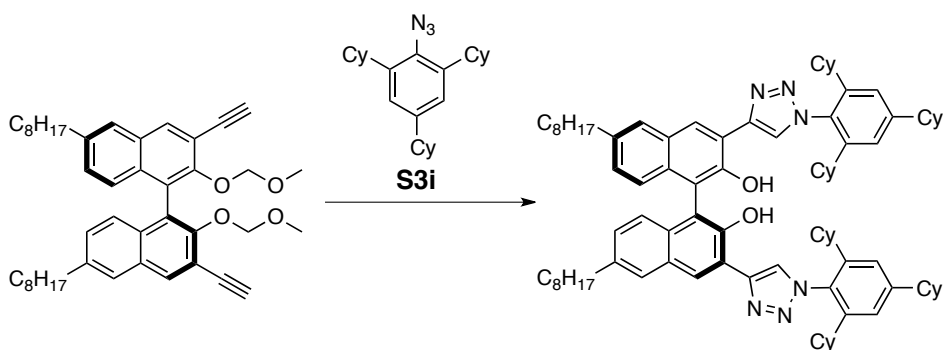

Subjection of *bis*-alkyne **8** (0.380 g, 0.586 mmol) and azide **S3i** (0.472 g, 1.29 mmol) to General Procedure A gave the title compound (0.300 g, 0.232 mmol, 40 % yield) as a yellow solid after purification by column chromatography on silica gel using Hex/Et<sub>2</sub>O as eluent (20:1). <sup>1</sup>H NMR (300 MHz, CDCl<sub>3</sub>) δ 10.25 (s, 2H), 8.34 (s, 2H), 8.16 (s, 2H), 7.69 (s, 2H), 7.24 (d, *J* = 8 Hz 2H), 7.17-7.13 (m, 6H), 2.72 (app t, *J* = 8 Hz, 4H), 2.63-2.34 (m, 6H), 1.47-1.19 (m, 86H), 0.87 (t, *J* = 8 Hz, 6H). <sup>13</sup>C NMR (126 MHz, CDCl<sub>3</sub>) δ 150.58, 150.54, 146.61, 144.87, 144.75, 138.18, 132.52, 130.85, 128.82, 128.56, 126.50, 125.80, 124.85, 123.44, 123.03, 122.99, 117.06, 116.90, 44.95, 39.17, 35.90, 34.87, 34.70, 34.66, 34.46, 33.15, 31.93, 31.35, 29.55, 29.39, 29.30, 27.27, 27.12, 26.88, 26.67, 26.59, 26.54, 26.50, 26.46, 26.29, 26.13, 25.95, 22.70, 14.14. HRMS (ESI) found [M+H]<sup>+</sup> 1289.9248, C<sub>88</sub>H<sub>117</sub>O<sub>2</sub>N<sub>6</sub> requires 1289.9233.

**(4*R*,11*bS*)-4-Hydroxy-9,14-dioctyl-2,6-bis(1-(2,4,6-tricyclohexylphenyl)-1*H*-1,2,3-triazol-4-yl)dinaphtho[2,1-*d*:1',2'-*f*][1,3,2]dioxaphosphepine 4-oxide (9i)**

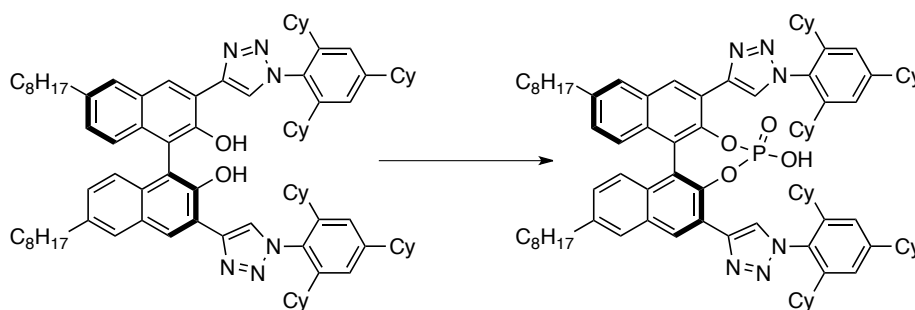

Subjection of diol **S3i** (0.271 g, 0.210 mmol) to General Procedure C gave the title compound (0.250 g, 0.185 mmol, 88 % yield) as a beige solid after purification by column chromatography on silica gel using Hex/EtOAc (1:1) with 0.5 % TFA as eluent. <sup>1</sup>H NMR (400 MHz, CDCl<sub>3</sub>: DMSO, 1:1) δ 8.76 (s, 2H), 8.74 (s, 2H), 7.96 (s, 2H), 7.19 - 7.13 (m, 4H), 7.09 (d, *J* = 8.4 Hz, 2H), 7.03 (s, 2H) 2.92 - 2.66 (m, 4H), 2.65 - 2.50 (m, 6H), 2.05 - 0.89 (m, 84H), 0.81 (t, *J* = 6.4 Hz, 6H). <sup>13</sup>C NMR (126 MHz, CDCl<sub>3</sub>: DMSO, 1:1) δ 148.22, 142.82, 142.62, 137.95, 129.57, 129.15, 128.55, 126.31, 126.01, 125.10, 124.73, 121.69, 121.35, 120.99, 120.92, 120.83, 42.76, 42.31, 37.15, 36.90, 35.73, 33.65, 32.74, 32.41, 32.38, 32.32, 31.99, 31.98, 31.92, 29.81, 29.13, 27.40, 27.26, 27.21, 24.83, 24.78, 24.74, 24.64, 24.44, 24.03, 24.00, 23.95, 23.83, 20.62, 12.35. <sup>31</sup>P NMR (162 MHz, CDCl<sub>3</sub>: DMSO, 1:1) δ 9.16. HRMS (ESI) found [M-H]<sup>-</sup> 1349.8649, C<sub>88</sub>H<sub>114</sub>O<sub>2</sub>N<sub>6</sub>P<sub>1</sub> requires 1349.8645.

**(S)-3,3'-bis(1-(4-(*tert*-butyl)phenyl)-1*H*-1,2,3-triazol-4-yl)-6,6'-dioctyl-[1,1'-binaphthalene]-2,2'-diol (S1j)**

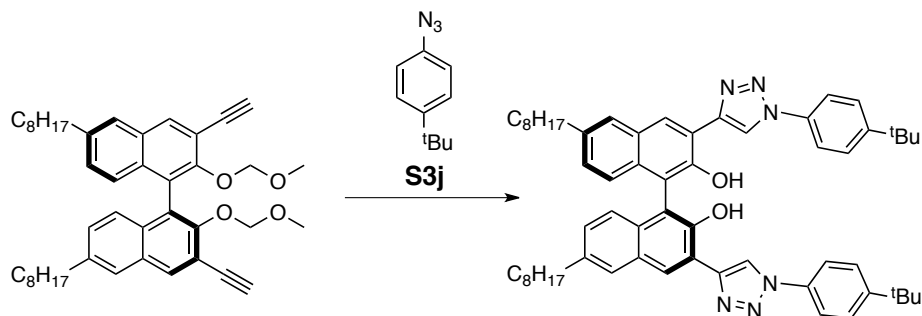

Subjection of *bis*-alkyne **8** (0.351 g, 0.541 mmol) and azide **S3j** (0.209 g, 1.19 mmol) to General Procedure A gave the title compound (0.210 g, 0.231 mmol, 43 % yield) as a yellow solid after purification by column chromatography on silica gel using Hex/EtOAc as eluent (10:1).  $^1\text{H NMR}$  (500 MHz,  $\text{CDCl}_3$ )  $\delta$  9.30 (s, 2H), 8.55 (s, 2H), 8.46 (s, 2H), 7.76 (d,  $J = 8.3$  Hz, 4H), 7.69 (s, 2H), 7.58 (d,  $J = 8.4$  Hz, 4H), 7.18 (d,  $J = 9.1$  Hz, 2H), 7.13 (d,  $J = 9.1$  Hz, 2H), 2.72 (t,  $J = 6.0$  Hz, 4H), 1.76 - 1.62 (m, 4H), 1.40 (s, 18H), 1.37 - 1.20 (m, 20H), 0.89 (t,  $J = 6.5$  Hz, 6H).  $^{13}\text{C NMR}$  (126 MHz,  $\text{CDCl}_3$ )  $\delta$  164.55, 152.47, 150.10, 138.36, 134.46, 132.28, 128.93, 128.75, 126.74, 126.69, 126.29, 124.69, 120.40, 119.19, 117.15, 115.93, 35.87, 34.86, 31.93, 31.31, 31.29, 29.55, 29.45, 29.31, 22.70, 14.15. **HRMS** (ESI) found  $[\text{M}+\text{H}]^+$  909.5801,  $\text{C}_{60}\text{H}_{73}\text{N}_6\text{O}_2$  requires 909.5790.

**(4*R*,11*bS*)-2,6-bis(1-(4-(*tert*-butyl)phenyl)-1*H*-1,2,3-triazol-4-yl)-4-hydroxy-9,14-dioctyldinaphtho[2,1-*d*:1',2'-*f*][1,3,2]dioxaphosphepine 4-oxide (9j)**

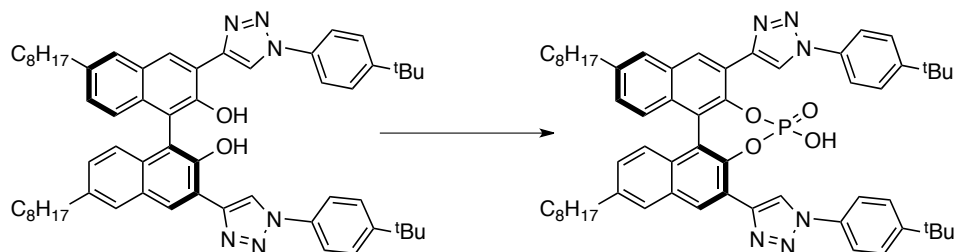

Subjection of diol **S1j** (0.181 g, 0.200 mmol) to General Procedure C gave the title compound (0.151 g, 0.155 mmol, 78 % yield) as a brown solid after purification by column chromatography on silica gel using Hex/EtOAc (1:1) with 1 % TFA as eluent.  $^1\text{H NMR}$  (500 MHz,  $\text{CDCl}_3$ : DMSO, 1:1)  $\delta$  8.98 (s, 2H), 8.73 (s, 2H), 7.79 (s, 2H), 7.69 (d,  $J = 8.4$  Hz, 4H), 7.40 (d,  $J = 8.1$  Hz, 4H), 7.11 (s, 4H), 2.72 (t,  $J = 7.6$  Hz, 4H), 1.77 - 1.55 (m, 4H), 1.45 - 1.08 (m, 38H), 0.85 (t,  $J = 6.3$  Hz, 6H).  $^{13}\text{C NMR}$  (126 MHz,  $\text{CDCl}_3$ : DMSO, 1:1)  $\delta$  164.54, 151.64, 144.42 (d,  $J = 7.6$  Hz), 143.06, 140.32, 134.55, 131.23, 130.41, 128.54, 128.19, 127.15, 126.67, 122.97, 122.76, 122.25, 120.11, 35.68,

34.72, 31.83, 31.32, 31.10, 29.43, 29.38, 29.24, 22.64, 14.33.  $^{31}\text{P}$  NMR (202 MHz,  $\text{CDCl}_3$ ; DMSO, 1:1)  $\delta$  3.50. HRMS (ESI) found  $[\text{M}+\text{H}]^+$  971.5355,  $\text{C}_{60}\text{H}_{72}\text{N}_6\text{O}_4\text{P}_1$  requires 971.5347.

**(S)-3,3'-bis(1-(3,5-di-*tert*-butylphenyl)-1*H*-1,2,3-triazol-4-yl)-6,6'-dioctyl-[1,1'-binaphthalene]-2,2'-diol (S1k)**

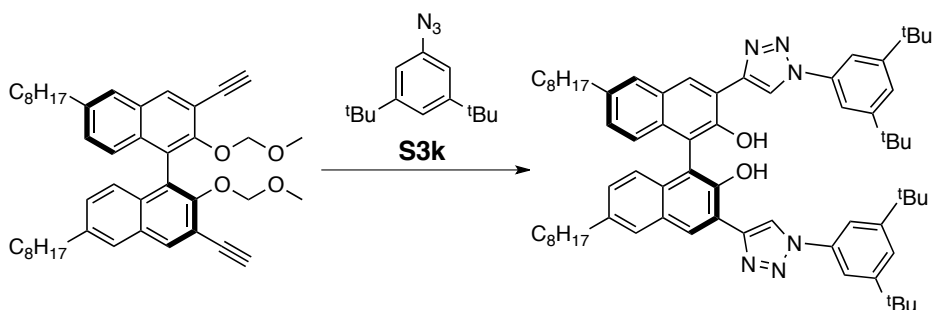

Subjection of *bis*-alkyne **8** (0.500 g, 0.771 mmol) and azide **S3k** (0.391 g, 1.69 mmol) to General Procedure A gave the title compound (0.409 g, 0.400 mmol, 52 % yield) as a yellow solid after purification by column chromatography on silica gel using Hex/EtOAc as eluent (20:1).  $^1\text{H}$  NMR (300 MHz,  $\text{CDCl}_3$ )  $\delta$  9.60 (s, 2H), 8.56 (s, 2H), 8.43 (s, 2H), 7.67 (s, 2H), 7.63 (s, 4H), 7.56 (s, 2H), 7.21 (d,  $J = 8.5$  Hz, 2H), 7.11 (d,  $J = 8.5$  Hz, 2H), 2.71 (app t,  $J = 7.4$  Hz, 4H), 1.79 - 1.58 (m, 4H), 1.48 - 1.17 (m, 56H), 0.87 (t,  $J = 6.7$  Hz, 6H).  $^{13}\text{C}$  NMR (75 MHz,  $\text{CDCl}_3$ )  $\delta$  153.22, 150.49, 147.26, 138.49, 136.89, 132.60, 129.09, 129.02, 126.95, 126.42, 124.93, 123.57, 119.75, 117.35, 116.47, 115.87, 36.13, 35.49, 32.20, 31.64, 31.56, 29.82, 29.71, 29.58, 22.96, 14.42. HRMS (ESI) found  $[\text{M}+\text{H}]^+$  1021.7058,  $\text{C}_{68}\text{H}_{89}\text{N}_6\text{O}_2$  requires 1021.7042.

**(4*R*,11*bS*)-2,6-bis(1-(3,5-di-*tert*-butylphenyl)-1*H*-1,2,3-triazol-4-yl)-4-hydroxy-9,14-dioctyldinaphtho[2,1-*d*:1',2'-*f*][1,3,2]dioxaphosphepine 4-oxide (9k)**

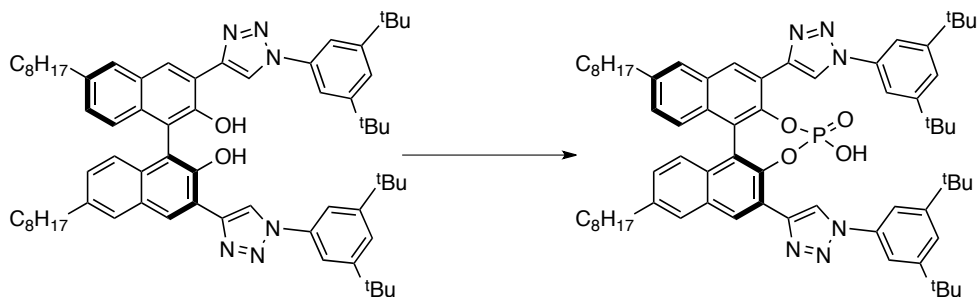

Subjection of diol **S1k** (0.352 g, 0.345 mmol) to General Procedure C gave the title compound (0.341 g, 0.315 mmol, 91 % yield) as a brown solid after purification by

column chromatography on silica gel using Hex/EtOAc (1:1) with 1 % TFA as eluent. **<sup>1</sup>H NMR** (500 MHz, CDCl<sub>3</sub>: DMSO, 1:1) δ 9.01 (s, 2H), 8.80 (s, 2H), 7.85 (s, 2H), 7.64 (s, 4H), 7.50 (s, 2H), 7.21 (d, *J* = 8.5 Hz, 2H), 7.17 (t, *J* = 8.5 Hz, 2H), 2.74 (t, *J* = 7.2 Hz, 4H), 1.80 - 1.62 (m, 4H), 1.45 - 1.08 (m, 56H), 0.84 (t, *J* = 6.1 Hz, 6H). **<sup>13</sup>C NMR** (126 MHz, CDCl<sub>3</sub>: DMSO, 1:1) δ 152.83, 144.05 (d, *J* = 8.9 Hz), 143.04, 140.63, 136.85, 131.44, 130.42, 128.75, 128.35, 127.22, 126.61, 122.95, 122.84, 122.73, 115.40, 35.70, 35.24, 31.82, 31.47, 31.11, 29.41, 29.33, 29.22, 22.63, 14.31. **<sup>31</sup>P NMR** (202 MHz, CDCl<sub>3</sub>: DMSO, 1:1) δ 2.35. **HRMS** (ESI) found [M+H]<sup>+</sup> 1083.6586, C<sub>68</sub>H<sub>88</sub>N<sub>6</sub>O<sub>4</sub>P<sub>1</sub> requires 1083.6599.

**(*S*)-3,3'-bis(adamantan-1-yl-1*H*-1,2,3-triazol-4-yl)-6,6'-dioctyl-[1,1'-binaphthalene]-2,2'-diol (**S11**)**

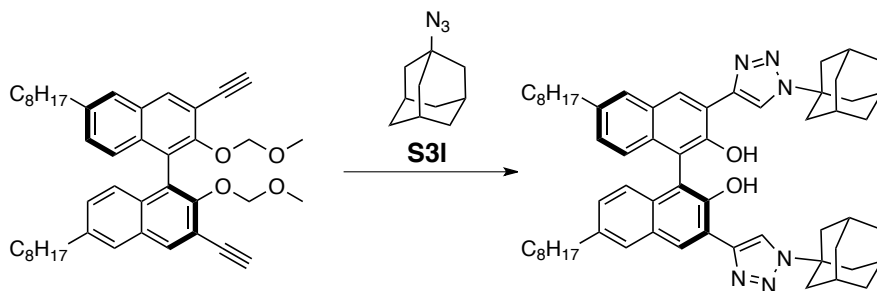

Subjection of *bis*-alkyne **8** (1.00 g, 1.54 mmol) and azide **S31** (0.601 g, 3.39 mmol) to General Procedure A gave the title compound (0.900 g, 0.981 mmol, 64 % yield) as a brown solid after purification by column chromatography on silica gel using Hex/EtOAc as eluent (10:1). **<sup>1</sup>H NMR** (300 MHz, CDCl<sub>3</sub>) δ 10.16 (s, 2H), 8.21 (s, 2H), 8.17 (s, 2H), 7.59 (s, 2H), 7.12 (d, *J* = 8.7 Hz, 2H), 7.05 (d, *J* = 8.7 Hz, 2H), 2.82 - 2.58 (m, 4H), 2.43 - 2.24 (m, 18H), 1.82 (s, 12H), 1.49 - 1.04 (m, 20H), 0.85 (t, *J* = 6.3 Hz, 6H). **<sup>13</sup>C NMR** (126 MHz, CDCl<sub>3</sub>) δ 150.59, 146.30, 137.65, 132.33, 128.52, 128.29, 126.43, 125.27, 124.79, 117.32, 117.15, 117.05, 60.23, 59.06, 42.92, 41.56, 35.93, 35.86, 35.81, 31.97, 31.38, 29.84, 29.76, 29.62, 29.55, 29.50, 29.36, 22.74, 14.19. **HRMS** (ESI) found [M+H]<sup>+</sup> 913.6100, C<sub>60</sub>H<sub>77</sub>O<sub>2</sub>N<sub>6</sub> requires 913.6103.



**(4*R*,11*bS*)-4-hydroxy-2,6-bis(adamantan-1-yl-1*H*-1,2,3-triazol-4-yl)-9,14-dioctyldinaphtho[2,1-*d*:1',2'-*f*][1,3,2]dioxaphosphine 4-oxide (9l)**

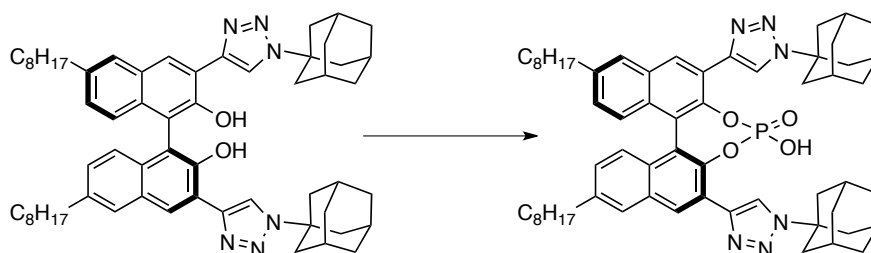

Subjection of diol **S11** (0.850 g, 0.927 mmol) to General Procedure C gave the title compound (0.882 g, 0.905 mmol, 98 % yield) as a brown solid after purification by column chromatography on silica gel using DCM/MeOH as eluent. (20:1).  $^1\text{H NMR}$  (500 MHz,  $\text{CDCl}_3$ : DMSO, 1:1)  $\delta$  8.70 (s, 2H), 8.56 (s, 2H), 7.80 (s, 2H), 7.11 (d,  $J = 8.5$  Hz, 2H), 7.09 (d,  $J = 8.5$  Hz, 2H), 2.81 - 2.62 (m, 4H), 2.34 - 2.13 (m, 18H), 1.77 (s, 12H), 1.70 - 1.52 (m, 4H), 1.44 - 1.11 (m, 20H), 0.83 (t,  $J = 6.7$  Hz, 6H).  $^{13}\text{C NMR}$  (126 MHz,  $\text{CDCl}_3$ : DMSO, 1:1)  $\delta$  144.00 (d,  $J = 9.6$  Hz), 141.28, 140.44, 131.35, 130.19, 128.54, 128.07, 127.15, 126.57, 123.23, 122.58, 120.91, 59.75, 42.87, 35.84, 35.62, 31.79, 31.09, 29.39, 29.37, 29.31, 29.19, 22.61, 14.33.  $^{31}\text{P NMR}$  (202 MHz,  $\text{CDCl}_3$ : DMSO, 1:1)  $\delta$  2.91. **HRMS** (ESI) found  $[\text{M}+\text{H}]^+$  975.5638,  $\text{C}_{60}\text{H}_{76}\text{O}_2\text{N}_6\text{P}_1$  requires 975.5660.

Compounds 11a and 11b were prepared according to the reaction sequence depicted in Scheme S3.

**Scheme S3. Synthesis of Catalysts 10a-b**

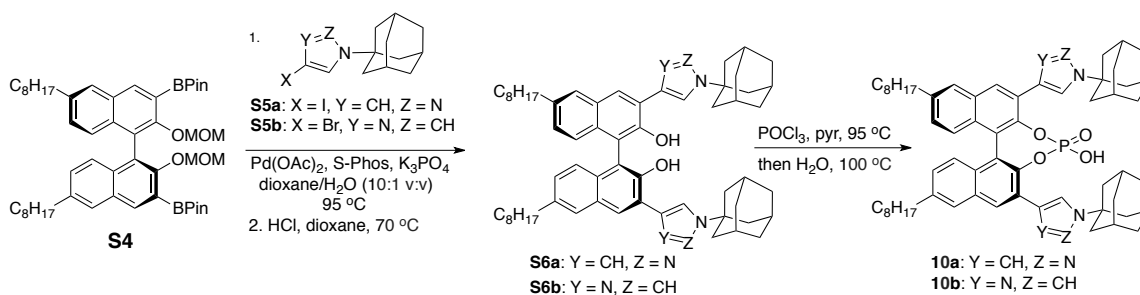

**1-((3*s*,5*s*,7*s*)-adamantan-1-yl)-4-iodo-1*H*-pyrazole (S5a)<sup>11</sup>**

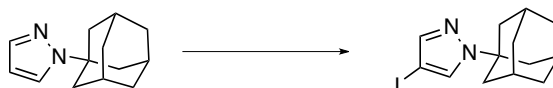

To magnetically stirred solution of iodic acid (0.176 g, 1.0 mmol) and iodine (0.302 g, 1.19 mmol) in carbon tetrachloride (0.5 mL), water (1 mL) and acetic acid (1 mL) was added 1-((3*s*,5*s*,7*s*)-adamantan-1-yl)-1*H*-pyrazole (0.750 g, 3.71 mmol).<sup>12</sup> The reaction mixture was heated at 50 °C for 12 h at which point TLC indicated complete consumption of the starting material. After being allowed to cool to room temperature, the reaction mixture was diluted with saturated aqueous Na<sub>2</sub>SO<sub>3</sub> (3 mL) and then basified by 1 N NaOH. The resulting suspension was extracted with EtOAc (3 X 20 mL), dried and concentrated *in vacuo* to afford the title compound (0.925 g, 2.83 mmol, 76 % yield) as a white semi-solid. <sup>1</sup>H NMR (500 MHz, CDCl<sub>3</sub>) δ 7.55 (s, 1H), 7.54 (s, 1H), 2.24 (s, 3H), 2.15 - 2.09 (m, 6H), 1.79 - 1.73 (m, 6H). <sup>13</sup>C NMR (126 MHz, CDCl<sub>3</sub>) δ 143.40, 129.61, 59.36, 54.96, 42.72, 36.05, 29.53. HRMS (ESI) found [M+H]<sup>+</sup> 329.0512, C<sub>13</sub>H<sub>18</sub>N<sub>2</sub>I requires 329.0509.

**(*S*)-3,3'-bis(adamantan-1-yl-1*H*-pyrazol-4-yl)-6,6'-dioctyl-[1,1'-binaphthalene]-2,2'-diol (**S6a**)**

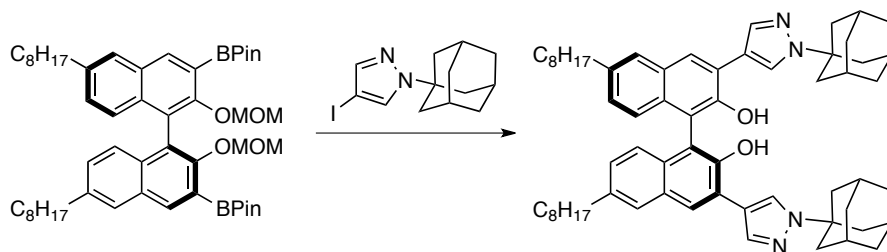

To a magnetically stirred solution of *bis*-boronate ester **S4** (0.868 g, 1.02 mmol) and pyrazole **S5a** (0.900 g, 2.75 mmol) in 1,4-dioxane/H<sub>2</sub>O (6.2/0.6 mL) were added Pd(OAc)<sub>2</sub> (0.011 g, 0.051 mmol), S-Phos (0.042 g, 0.102 mmol), and K<sub>3</sub>PO<sub>4</sub> (0.650 g, 3.06 mmol). The reaction mixture was degassed under vacuum (3 X 30 s) and stirred at 95 °C for 15 h. The reaction mixture was allowed to cool to room temperature and then filtered through celite, dried (Na<sub>2</sub>SO<sub>4</sub>) and concentrated *in vacuo*. The crude residue was dissolved in 1,4-dioxane (20 mL) and concentrated HCl (2 mL) was added. The reaction mixture was stirred at 70 °C for 2 h, and then allowed to cool to room temperature and concentrated *in vacuo*. The residue was dissolved in DCM and washed with saturated aqueous Na<sub>2</sub>CO<sub>3</sub> (20 mL), H<sub>2</sub>O (20 mL) and brine (20 mL). The organic extracts were dried (Na<sub>2</sub>SO<sub>4</sub>) and concentrated *in vacuo*. The crude residue was purified by column chromatography on silica gel using Hex/EtOAc as eluent (20:1 to 10:1) to afford the title compound (0.275 g, 0.302 mmol, 30 % yield) as a yellow solid. <sup>1</sup>H NMR (500 MHz, CDCl<sub>3</sub>) δ 8.18 (s, 2H), 8.15 (s, 2H), 8.08 (s, 2H), 7.69 (s, 2H), 7.17 - 6.99 (m, 4H), 5.73 (s, 2H), 2.77 - 2.68 (m, 4H), 2.31 - 2.13 (m, 18H), 1.84 - 1.67 (m, 16H), 1.44 - 1.24 (m, 20H), 0.90 (t, *J* = 6.5 Hz, 6H). <sup>13</sup>C NMR (126 MHz, CDCl<sub>3</sub>) δ 149.52, 138.87, 137.47,

130.24, 129.76, 128.32, 126.71, 126.45, 125.26, 124.07, 122.07, 116.97, 111.95, 58.63, 42.83, 36.16, 35.92, 31.94, 31.42, 29.57, 29.54, 29.45, 29.32, 22.72, 14.17. **HRMS** (ESI) found  $[M-H]^-$  909.6046,  $C_{62}H_{77}N_4O_2$  requires 909.6052.

**(4*R*,11*bS*)-4-hydroxy-2,6-bis(adamantan-1-yl-1*H*-pyrazol-4-yl)-9,14-dioctyldinaphtho[2,1-*d*:1',2'-*f*][1,3,2]dioxaphosphepine 4-oxide (10a)**

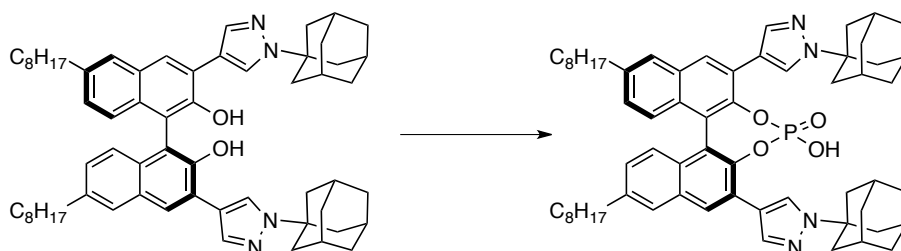

Subjection of diol **S6a** (0.080 g, 0.088 mmol) to General Procedure C gave the title compound (0.078 g, 0.080 mmol, 91 % yield) as a dark-yellow solid. **<sup>1</sup>H NMR** (400 MHz, DMSO)  $\delta$  8.32 (s, 2H), 8.14 (s, 2H), 8.04 (s, 2H), 7.66 (s, 2H), 7.01 (s, 4H), 2.65 (t,  $J = 7.6$  Hz, 4H), 2.28 - 2.07 (m, 18H), 1.80 - 1.67 (m, 12H), 1.67 - 1.49 (m, 4H), 1.35 - 1.14 (m, 20H), 0.80 (t,  $J = 6.5$  Hz, 6H). **<sup>13</sup>C NMR** (126 MHz, DMSO)  $\delta$  164.54, 144.21 (d,  $J = 9.6$  Hz), 140.11, 137.88, 131.65, 129.37, 127.68, 127.22, 126.56, 126.45, 125.59, 125.42, 122.68, 116.64, 58.62, 42.82, 36.12, 35.66, 31.81, 31.07, 29.47, 29.44, 29.40, 29.28, 29.20, 22.62, 14.34. **<sup>31</sup>P NMR** (162 MHz, DMSO)  $\delta$  1.91. **HRMS** (ESI) found  $[M-H]^-$  971.5584,  $C_{62}H_{76}N_4O_4P_1$  requires 971.5610.

**1-((3*s*,5*s*,7*s*)-adamantan-1-yl)-4-bromo-1*H*-imidazole (S5b)**

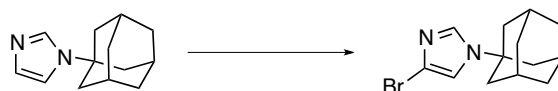

To a magnetically stirred solution of 1-((1*r*,3*R*,5*S*)-adamantan-1-yl)-1*H*-imidazole<sup>13</sup> (0.782 g, 3.87 mmol) in DMF (40 mL) was added N-bromosuccinimide (0.757 g, 4.25 mmol) and the reaction mixture was stirred at room temperature for 24 h. The crude reaction mixture was poured into H<sub>2</sub>O (50 mL) and extracted with EtOAc (50 mL). The organic extracts were washed with H<sub>2</sub>O (4 X 50 mL), dried (Na<sub>2</sub>SO<sub>4</sub>) and concentrated *in vacuo*. Purification of the crude residue by column chromatography on silica gel using Hex/EtOAc as eluent (3:1) afforded the title compound (0.400 g, 1.42 mmol, 37 % yield) as a white solid. **<sup>1</sup>H NMR** (600 MHz, CDCl<sub>3</sub>)  $\delta$  7.45 (s, 1H), 6.99 (s, 1H), 2.19 (s, 3H), 2.01 (s, 6H), 1.72 (dd,  $J = 34.6, 12.9$  Hz, 6H). **<sup>13</sup>C NMR** (151 MHz, CDCl<sub>3</sub>)  $\delta$  133.16, 114.93, 114.72, 56.06, 43.49, 35.76, 29.34. **HRMS** (ESI) found  $[M+H]^+$  281.0649,  $C_{13}H_{18}N_2Br$  requires 281.0648.

**(S)-3,3'-bis(adamantan-1-yl-1H-imidazol-4-yl)-6,6'-dioctyl-[1,1'-binaphthalene]-2,2'-diol (S6b)**

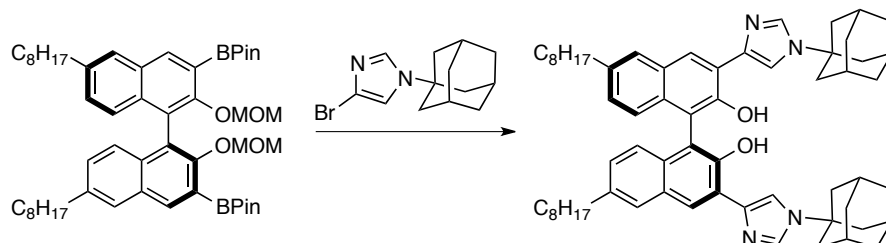

To a magnetically stirred solution of *bis*-boronate ester **S4** (0.408 g, 0.479 mmol) and imidazole **S5b** (0.363 g, 1.29 mmol) in 1,4-dioxane/H<sub>2</sub>O (6.2/0.6 mL) were added Pd(OAc)<sub>2</sub> (0.011 g, 0.051 mmol), S-Phos (0.042 g, 0.102 mmol), and K<sub>3</sub>PO<sub>4</sub> (0.650 g, 3.06 mmol). The reaction mixture was degassed under vacuum (3 x 30 s) and stirred at 95 °C for 15 h. The reaction mixture was allowed to cool to room temperature and then filtered through Celite, dried (Na<sub>2</sub>SO<sub>4</sub>) and concentrated *in vacuo*. The crude residue was dissolved in 1,4-dioxane (20 mL) and concentrated HCl (2 mL) was added. The reaction mixture was stirred at 70 °C for 2 h, and the allowed to cool to room temperature and concentrated *in vacuo*. The residue was dissolved in DCM and washed with saturated aqueous Na<sub>2</sub>CO<sub>3</sub> (20 mL), H<sub>2</sub>O (20 mL) and brine (20 mL). The organic extracts were dried (Na<sub>2</sub>SO<sub>4</sub>) and concentrated *in vacuo*. The crude residue was purified by column chromatography on silica gel using Hex/EtOAc as eluent (20:1 to 10:1) to afford the title compound (0.275 g, 0.302 mmol, 30 % yield) as a yellow solid. <sup>1</sup>H NMR (500 MHz, CDCl<sub>3</sub>) δ 8.11 (s, 2H), 7.67 (s, 2H), 7.66 (s, 2H), 7.59 (s, 2H), 7.20 (d, *J* = 8.6 Hz, 2H), 7.03 (d, *J* = 8.6 Hz, 2H), 2.71 (t, *J* = 7.7 Hz, 4H), 2.29 (s, 6H), 2.18 (s, 12H), 1.90 - 1.76 (m, 12H), 1.73 - 1.62 (m, 4H), 1.49 - 1.23 (m, 20H), 0.91 (t, *J* = 6.3 Hz, 6H). <sup>13</sup>C NMR (126 MHz, CDCl<sub>3</sub>) δ 151.70, 141.09, 136.92, 132.10, 131.41, 128.35, 127.39, 126.03, 124.98, 122.95, 119.71, 117.33, 111.65, 55.83, 43.80, 35.95, 35.84, 31.96, 31.37, 29.60, 29.51, 29.47, 29.33, 22.72, 14.15. HRMS (ESI) found [M+H]<sup>+</sup> 911.6201, C<sub>62</sub>H<sub>79</sub>N<sub>4</sub>O<sub>2</sub> requires 911.6198.

**(4R,11bS)-4-hydroxy-2,6-bis(adamantan-1-yl-1H-imidazol-4-yl)-9,14-dioctyldinaphtho[2,1-*d*:1',2'-*f*][1,3,2]dioxaphosphpine 4-oxide (10b)**

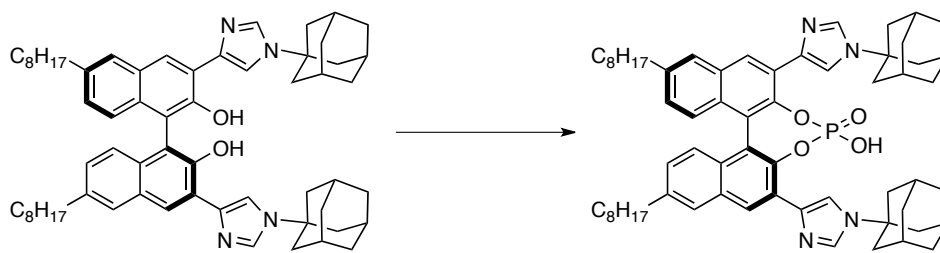

**S28**

Subjection of diol **S6b** (0.051 g, 0.056 mmol) to General Procedure C gave the title compound (0.013 g, 0.013 mmol, 23 % yield) as a dark-yellow solid.  $^1\text{H NMR}$  (500 MHz,  $\text{CDCl}_3$ : DMSO, 1:1)  $\delta$  8.37 (s, 2H), 8.09 (s, 2H), 7.93 (s, 2H), 7.60 (s, 2H), 7.03 (d,  $J = 8.8$  Hz, 2H), 6.88 (d,  $J = 8.6$  Hz, 2H), 2.64 (t,  $J = 7.8$  Hz, 4H), 2.26 (s, 6H), 2.18 (s, 12H), 1.82 - 1.68 (m, 12H), 1.67 - 1.53 (m, 4H), 1.36 - 1.12 (m, 20H), 0.81 (t,  $J = 6.6$  Hz, 6H).  $^{13}\text{C NMR}$  (126 MHz,  $\text{CDCl}_3$ : DMSO, 1:1)  $\delta$  151.79, 140.30, 136.78, 132.44, 131.85, 128.21, 127.20, 124.86, 122.82, 119.77, 117.36, 113.17, 99.99, 56.18, 43.41, 35.86, 35.68, 31.81, 31.37, 29.48, 29.42, 29.29, 29.19, 22.59, 14.33.  $^{31}\text{P NMR}$  (202 MHz,  $\text{CDCl}_3$ : DMSO, 1:1)  $\delta$  9.12. **HRMS** (ESI) found  $[\text{M}+\text{H}]^+$  973.5771,  $\text{C}_{62}\text{H}_{78}\text{N}_4\text{O}_4\text{P}$  requires 973.5755.

## Synthesis of Substrates

Compounds **5a-r** were prepared according to the reaction sequence depicted in Scheme S4. Compounds **5a-m** and **5q-r** were prepared from known compound 2-(3,4-dihydroisoquinolin-2(1*H*)-yl)benzoic acid.<sup>14</sup>

### Scheme S4. Synthesis of Substrates **5**

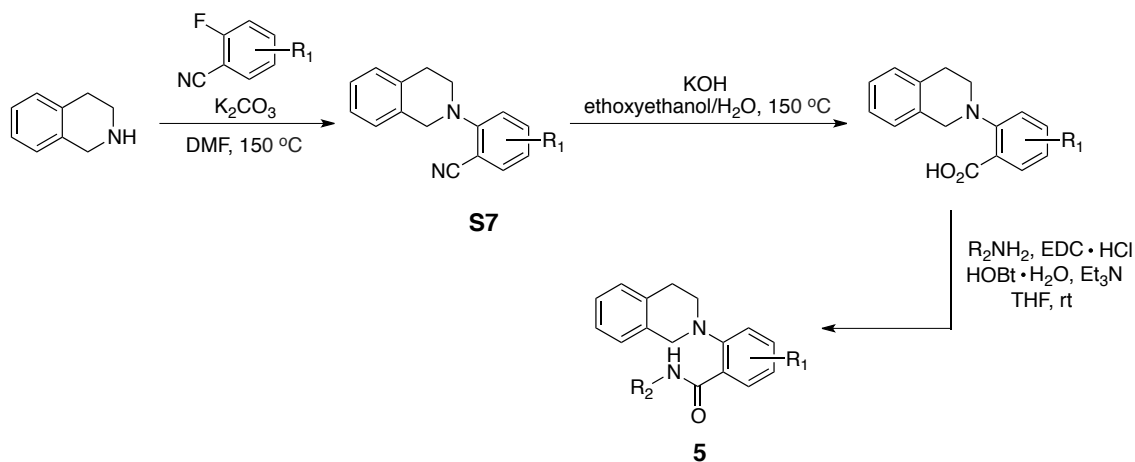

### General Procedure D: Synthesis of Compounds **5a-m** and **5q-r**

To a magnetically stirred solution of 2-(3,4-dihydroisoquinolin-2(1*H*)-yl)benzoic acid (1.0 equiv.) in  $\text{THF}$  (0.1 M) were added *N*-(3-dimethylaminopropyl)-*N'*-ethylcarbodiimide hydrochloride (1.2 equiv.), 1-hydroxybenzotriazole hydrate (1.2 equiv.), triethylamine (1.3 equiv.), and the appropriate primary amine (1.2 equiv.) in succession and the reaction mixture was stirred at room temperature. Upon complete consumption of the starting material, as judged by TLC, the reaction mixture was filtered through silica gel

using EtOAc/Hex (1:1) as eluent. The resulting filtrate was concentrated *in vacuo*. The crude residue was purified by column chromatography or recrystallization.

### General Procedure E: Synthesis of N-arylated tetrahydroisoquinolines S7

To a magnetically stirred solution of 1,2,3,4-tetrahydroisoquinoline (2.0 equiv.) in DMF (2.0 M) was added K<sub>2</sub>CO<sub>3</sub> (2.0 equiv.) followed by the appropriate 2-fluorobenzonitrile (1.0 equiv.). The reaction mixture was heated at 150 °C until TLC indicated complete consumption of the starting material. After being allowed to cool to room temperature, the reaction mixture was diluted with EtOAc, extracted with saturated aqueous NH<sub>4</sub>Cl, washed with H<sub>2</sub>O (x 4), dried (Na<sub>2</sub>SO<sub>4</sub>) and concentrated *in vacuo*. The crude residue was purified by column chromatography on silica gel using EtOAc/Hex as eluent.

### General Procedure F: Synthesis of Compounds 5n-p

To a magnetically stirred solution of N-arylated 1,2,3,4-tetrahydroisoquinoline derivative S7 (1.0 equiv.) in ethoxyethanol/H<sub>2</sub>O (8:1 v:v, 1.0 M) was added freshly-ground KOH (6.0 equiv.). The reaction mixture was heated at 150 °C for 2h, at which point a precipitate was observed. The reaction mixture was allowed to cool to room temperature and the solid was filtered and dissolved in H<sub>2</sub>O. This solution was acidified to pH = 7 using 3N HCl and extracted with DCM (x 2), dried (Na<sub>2</sub>SO<sub>4</sub>), and concentrated *in vacuo* to afford the crude carboxylic acid. Assuming quantitative yield, the crude product was dissolved in THF (0.1 M). To this magnetically stirred solution were added N-(3-dimethylaminopropyl)-N'-ethylcarbodiimide hydrochloride (1.2 equiv.), 1-hydroxybenzotriazole hydrate (1.2 equiv.), triethylamine (1.3 equiv.), and the appropriate primary amine (1.2 equiv.) in succession and the reaction mixture was stirred at room temperature. Upon complete consumption of the starting material, as judged by TLC, the reaction mixture was filtered through silica gel using EtOAc/Hex (1:1) as eluent. The resulting filtrate was concentrated *in vacuo*. The crude residue was purified by column chromatography or recrystallization.

### N-benzyl-2-(3,4-dihydroisoquinolin-2(1H)-yl)benzamide (5a)

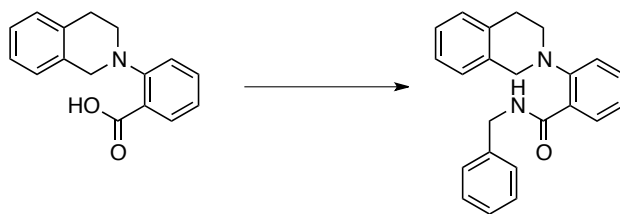

Subjection of 2-(3,4-dihydroisoquinolin-2(1*H*)-yl)benzoic acid (1.00 g, 3.94 mmol) to General Procedure D gave the title compound (1.02 g, 2.98 mmol, 76 % yield) as a white solid after purification by column chromatography on silica gel using Hex/EtOAc as eluent (9:1). **<sup>1</sup>H NMR** (600 MHz, CDCl<sub>3</sub>) δ 10.21 (s, 1H), 8.28 (d, *J* = 7.3 Hz, 1H), 7.47 (t, *J* = 7.6 Hz, 1H), 7.32 - 7.24 (m, 2H), 7.23 - 7.11 (m, 3H), 7.11 - 7.04 (m, 3H), 7.03 - 6.96 (m, 3H), 4.48 (d, *J* = 5.1 Hz, 2H), 4.08 (s, 2H), 3.26 (t, *J* = 5.8 Hz, 2H), 2.76 (t, *J* = 5.8 Hz, 2H). **<sup>13</sup>C NMR** (126 MHz, CDCl<sub>3</sub>) δ 166.03, 151.23, 137.99, 133.78, 133.40, 132.17, 131.64, 129.02, 128.49, 127.96, 127.88, 127.14, 126.70, 126.31, 126.10, 125.18, 121.00, 56.77, 50.40, 44.06, 29.24. **HRMS** (ESI) found [M+H]<sup>+</sup> 343.1800, C<sub>23</sub>H<sub>23</sub>N<sub>2</sub>O requires 343.1805.

**2-(3,4-dihydroisoquinolin-2(1*H*)-yl)-*N*-(4-methylbenzyl)benzamide (5b)**

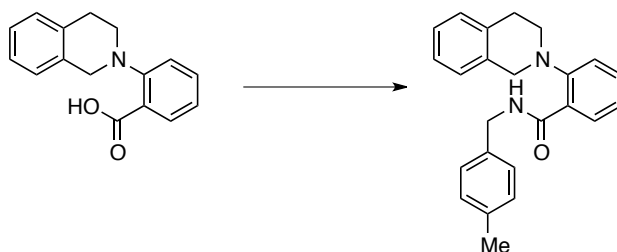

Subjection of 2-(3,4-dihydroisoquinolin-2(1*H*)-yl)benzoic acid (1.00 g, 3.94 mmol) to General Procedure D gave the title compound (0.587 g, 1.65 mmol, 42 % yield) as a white solid after recrystallization from hot EtOAc. **<sup>1</sup>H NMR** (500 MHz, CDCl<sub>3</sub>) δ 10.18 (s, 1H), 8.29 (d, *J* = 9.3 Hz, 1H), 7.48 (app t, *J* = 7.6 Hz, 1H), 7.33 - 7.15 (m, 4H), 7.06 (d, *J* = 7.5 Hz, 1H), 7.00 (d, *J* = 7.2 Hz, 1H), 6.91 (d, *J* = 13.0 Hz, 2H), 6.88 (d, *J* = 13.0 Hz, 2H), 4.45 (d, *J* = 5.0 Hz, 2H), 4.08 (s, 2H), 3.27 (t, *J* = 5.9 Hz, 2H), 2.78 (t, *J* = 5.9 Hz, 2H), 2.28 (s, 3H). **<sup>13</sup>C NMR** (126 MHz, CDCl<sub>3</sub>) δ 165.91, 151.23, 136.65, 134.88, 133.76, 133.42, 132.12, 131.61, 129.15, 128.91, 128.01, 127.85, 126.55, 126.29, 126.01, 125.16, 121.01, 56.70, 50.37, 43.83, 29.26, 21.13. **HRMS** (ESI) found [M+H]<sup>+</sup> 357.1958, C<sub>24</sub>H<sub>25</sub>N<sub>2</sub>O requires 357.1961.

**2-(3,4-dihydroisoquinolin-2(1*H*)-yl)-*N*-(4-methoxybenzyl)benzamide (5c)**

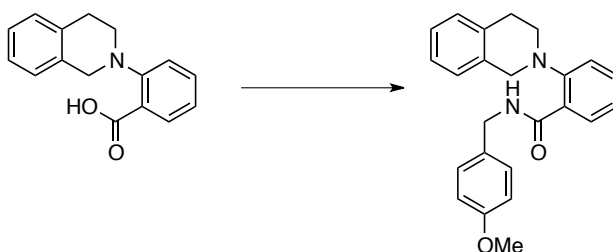

Subjection of 2-(3,4-dihydroisoquinolin-2(1*H*)-yl)benzoic acid (1.00 g, 3.94 mmol) to General Procedure D gave the title compound (0.680 g, 1.82 mmol, 46 % yield) as a

white solid after recrystallization from hot EtOAc.  $^1\text{H NMR}$  (500 MHz,  $\text{CDCl}_3$ )  $\delta$  10.17 (s, 1H), 8.29 (d,  $J = 9.1$  Hz, 1H), 7.48 (app t,  $J = 7.6$  Hz, 1H), 7.34 - 7.15 (m, 4H), 7.08 (d,  $J = 7.2$  Hz, 1H), 7.00 (d,  $J = 7.3$  Hz, 1H), 6.93 (d,  $J = 8.5$  Hz, 2H), 6.60 (d,  $J = 8.5$  Hz, 2H), 4.43 (d,  $J = 5.0$  Hz, 2H), 4.07 (s, 2H), 3.80 (s, 3H), 3.27 (t,  $J = 5.8$  Hz, 2H), 2.78 (t,  $J = 5.7$  Hz, 2H).  $^{13}\text{C NMR}$  (126 MHz,  $\text{CDCl}_3$ )  $\delta$  165.85, 158.60, 151.22, 133.79, 133.44, 132.12, 131.58, 130.06, 129.17, 128.95, 128.00, 126.62, 126.30, 126.03, 125.17, 120.99, 113.81, 56.80, 55.18, 50.27, 43.50, 29.31. **HRMS** (ESI) found  $[\text{M}+\text{H}]^+$  373.1906,  $\text{C}_{24}\text{H}_{25}\text{N}_2\text{O}_2$  requires 373.1911.

### 2-(3,4-dihydroisoquinolin-2(1H)-yl)-N-(4-nitrobenzyl)benzamide (5d)

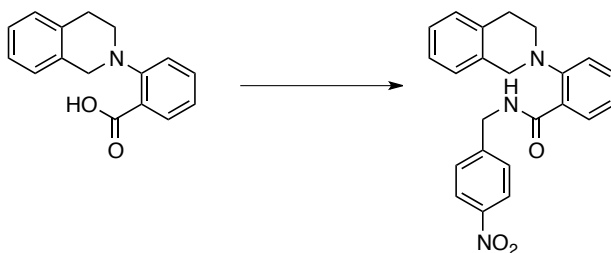

Subjection of 2-(3,4-dihydroisoquinolin-2(1H)-yl)benzoic acid (1.00 g, 3.94 mmol) to General Procedure D gave the title compound (0.473 g, 1.22 mmol, 31 % yield) as a white solid after recrystallization from hot EtOAc.  $^1\text{H NMR}$  (500 MHz,  $\text{CDCl}_3$ )  $\delta$  10.58 (s, 1H), 8.30 (d,  $J = 7.8$  Hz, 1H), 7.91 (d,  $J = 8.6$  Hz, 2H), 7.53 (app t,  $J = 7.6$  Hz, 1H), 7.36 - 7.29 (m, 2H), 7.23 - 7.12 (m, 4H), 7.05 (d,  $J = 7.5$  Hz, 1H), 6.92 (d,  $J = 7.5$  Hz, 1H), 4.57 (d,  $J = 5.4$  Hz, 2H), 4.02 (s, 2H), 3.32 (t,  $J = 5.9$  Hz, 2H), 2.86 (t,  $J = 5.9$  Hz, 2H).  $^{13}\text{C NMR}$  (126 MHz,  $\text{CDCl}_3$ )  $\delta$  166.16, 151.28, 147.00, 145.50, 133.48, 133.01, 132.60, 131.62, 128.92, 128.57, 127.51, 126.90, 126.28, 126.18, 125.57, 123.71, 121.35, 57.27, 50.11, 43.27, 29.58. **HRMS** (ESI) found  $[\text{M}+\text{H}]^+$  388.1651,  $\text{C}_{23}\text{H}_{22}\text{N}_3\text{O}_3$  requires 388.1656.

### 2-(3,4-dihydroisoquinolin-2(1H)-yl)-N-(2-methoxybenzyl)benzamide (5e)

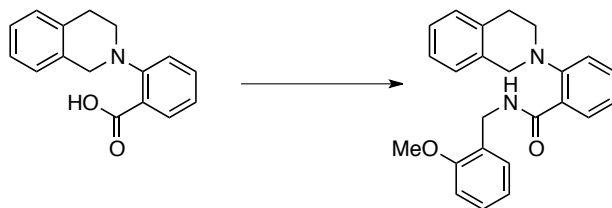

Subjection of 2-(3,4-dihydroisoquinolin-2(1H)-yl)benzoic acid (1.00 g, 3.94 mmol) to General Procedure D gave the title compound (0.251 g, 0.673 mmol, 17 % yield) as a white solid after recrystallization from hot EtOAc.  $^1\text{H NMR}$  (500 MHz,  $\text{CDCl}_3$ )  $\delta$  9.98



(s, 1H), 8.26 (d,  $J = 8.1$  Hz, 1H), 7.45 (app t,  $J = 7.7$  Hz, 1H), 7.31 - 7.24 (m, 2H), 7.24 - 7.12 (m, 4H), 7.08 (d,  $J = 7.4$  Hz, 1H), 7.01 (d,  $J = 7.7$  Hz, 1H), 6.79 (app t,  $J = 7.4$  Hz, 1H), 6.61 (d,  $J = 8.1$  Hz, 1H), 4.58 (d,  $J = 5.5$  Hz, 2H), 4.13 (s, 2H), 3.42 (s, 3H), 3.23 (t,  $J = 5.8$  Hz, 2H), 2.76 (t,  $J = 5.9$  Hz, 2H).  $^{13}\text{C}$  NMR (126 MHz,  $\text{CDCl}_3$ )  $\delta$  166.04, 157.41, 151.10, 134.05, 133.62, 131.86, 131.75, 129.87, 129.02, 128.63, 128.30, 126.44, 126.31, 126.23, 126.00, 124.80, 120.54, 120.44, 110.13, 55.24, 54.77, 51.59, 39.07, 28.97. HRMS (ESI) found  $[\text{M}+\text{H}]^+$  373.1906,  $\text{C}_{24}\text{H}_{25}\text{N}_2\text{O}_2$  requires 373.1911.

### 2-(3,4-dihydroisoquinolin-2(1H)-yl)-N-phenylbenzamide (5f)

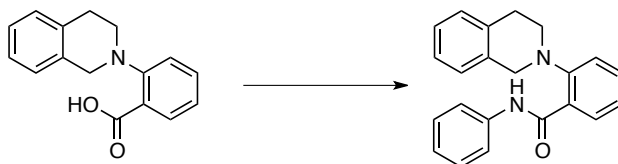

Subjection of 2-(3,4-dihydroisoquinolin-2(1H)-yl)benzoic acid (0.506 g, 2.0 mmol) to General Procedure D gave the title compound (0.500 g, 0.673 mmol, 76 % yield) as a white solid after purification by column chromatography on silica gel using Hex/EtOAc as eluent (10:1).  $^1\text{H}$  NMR (500 MHz,  $\text{CDCl}_3$ )  $\delta$  12.51 (s, 1H), 8.41 (d,  $J = 7.5$  Hz, 1H), 7.56 (app t,  $J = 8.4$  Hz, 1H), 7.43 - 7.35 (m, 2H), 7.35 - 7.25 (m, 4H), 7.25 - 7.14 (m, 3H), 7.09 (d,  $J = 7.6$  Hz, 1H), 7.02 (t,  $J = 7.4$  Hz, 1H), 4.23 (s, 2H), 3.46 (t,  $J = 6.0$  Hz, 2H), 3.20 (t,  $J = 6.0$  Hz, 2H).  $^{13}\text{C}$  NMR (126 MHz,  $\text{CDCl}_3$ )  $\delta$  163.84, 150.90, 138.72, 133.77, 133.13, 132.61, 131.93, 129.05, 128.91, 128.12, 127.15, 126.78, 126.32, 125.71, 123.59, 121.43, 119.60, 56.75, 51.14, 29.41. HRMS (ESI) found  $[\text{M}+\text{H}]^+$  329.1647,  $\text{C}_{22}\text{H}_{21}\text{N}_2\text{O}_1$  requires 329.1648.

### 2-(3,4-dihydroisoquinolin-2(1H)-yl)-N-(*m*-tolyl)benzamide (5g)

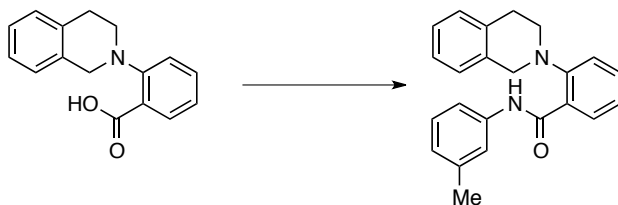

Subjection of 2-(3,4-dihydroisoquinolin-2(1H)-yl)benzoic acid (1.00 g, 3.94 mmol) to General Procedure D gave the title compound (0.785 g, 2.29 mmol, 58 % yield) as a white solid after recrystallization from hot EtOAc.  $^1\text{H}$  NMR (500 MHz,  $\text{CDCl}_3$ )  $\delta$  12.52 (s, 1H), 8.41 (d,  $J = 6.6$  Hz, 1H), 7.56 (app t,  $J = 7.6$  Hz, 1H), 7.42 - 7.35 (m, 2H), 7.35 - 7.27 (m, 2H), 7.27 - 7.16 (m, 2H), 7.12 - 7.03 (m, 2H), 6.93 (s, 1H), 6.83 (d,  $J = 7.4$  Hz, 1H), 4.22 (s, 2H), 3.47 (t,  $J = 5.9$  Hz, 2H), 3.21 (t,  $J = 6.0$  Hz, 2H), 2.18 (s, 3H).  $^{13}\text{C}$

**NMR** (126 MHz, CDCl<sub>3</sub>)  $\delta$  163.71, 150.88, 138.64, 138.61, 133.86, 133.25, 132.57, 131.90, 129.01, 128.74, 128.18, 127.20, 126.89, 126.26, 125.74, 124.39, 121.48, 120.25, 116.77, 56.95, 50.98, 29.44, 21.44. **HRMS** (ESI) found  $[M+H]^+$  343.1803, C<sub>23</sub>H<sub>23</sub>N<sub>2</sub>O<sub>1</sub> requires 343.1805.

**2-(3,4-dihydroisoquinolin-2(1H)-yl)-N-(*o*-tolyl)benzamide (5h)**

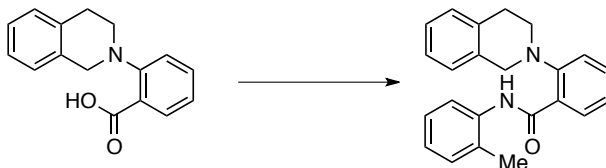

Subjection of 2-(3,4-dihydroisoquinolin-2(1H)-yl)benzoic acid (1.00 g, 3.94 mmol) to General Procedure D gave the title compound (0.695 g, 2.03 mmol, 52 % yield) as a white solid after purification by column chromatography on silica gel using Hex/EtOAc as eluent (4:1). **<sup>1</sup>H NMR** (500 MHz, CDCl<sub>3</sub>)  $\delta$  11.57 (s, 1H), 8.37 (d,  $J$  = 7.7 Hz, 1H), 8.13 (d,  $J$  = 8.1 Hz, 1H), 7.53 (app t,  $J$  = 7.6 Hz, 1H), 7.40 - 7.32 (m, 2H), 7.26 - 7.20 (m, 3H), 7.17 (d,  $J$  = 7.6 Hz, 1H), 7.15 - 7.07 (m, 2H), 7.04 (app t,  $J$  = 7.3 Hz, 1H), 4.36 (s, 2H), 3.45 (t,  $J$  = 5.9 Hz, 2H), 3.02 (t,  $J$  = 5.9 Hz, 2H), 1.98 (s, 3H). **<sup>13</sup>C NMR** (126 MHz, CDCl<sub>3</sub>)  $\delta$  164.56, 150.73, 136.58, 133.73, 133.39, 132.45, 132.16, 130.33, 128.97, 128.63, 128.51, 126.95, 126.57, 126.41, 126.36, 125.36, 124.39, 122.77, 121.04, 55.60, 52.11, 28.58, 17.60. **HRMS** (ESI) found  $[M+H]^+$  343.1802, C<sub>23</sub>H<sub>23</sub>N<sub>2</sub>O requires 343.1805.

**2-(3,4-dihydroisoquinolin-2(1H)-yl)-N-(naphthalen-1-yl)benzamide (5i)**

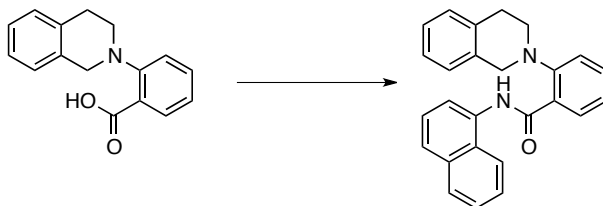

Subjection of 2-(3,4-dihydroisoquinolin-2(1H)-yl)benzoic acid (0.500 g, 1.97 mmol) to General Procedure D gave the title compound (0.304 g, 0.803 mmol, 41 % yield) as a white solid after recrystallization from hot EtOAc. **<sup>1</sup>H NMR** (300 MHz, CDCl<sub>3</sub>)  $\delta$  12.61 (s, 1H), 8.45 (d,  $J$  = 7.8 Hz, 2H), 7.75 (d,  $J$  = 8.1 Hz, 1H), 7.63 - 7.52 (m, 3H), 7.47 (app t,  $J$  = 7.9 Hz, 2H), 7.39 (app t,  $J$  = 7.5 Hz, 1H), 7.33 - 7.14 (m, 4H), 7.06 (d,  $J$  = 6.7 Hz, 1H), 6.63 (app t,  $J$  = 7.7 Hz, 1H), 4.45 (s, 2H), 3.43 (t,  $J$  = 5.9 Hz, 2H), 2.98 (t,  $J$  = 6.0 Hz, 2H). **<sup>13</sup>C NMR** (126 MHz, CDCl<sub>3</sub>)  $\delta$  164.62, 151.12, 133.90, 133.71, 133.70,

133.51, 132.65, 132.29, 129.20, 128.74, 128.48, 126.98, 126.51, 126.41, 126.00, 125.86, 125.58, 125.26, 124.26, 121.54, 120.97, 118.62, 55.86, 52.52, 29.18. **HRMS** (ESI) found  $[M+H]^+$  379.1801,  $C_{26}H_{23}N_2O$  requires 379.1805.

***N*-(2-chlorophenyl)-2-(3,4-dihydroisoquinolin-2(1*H*)-yl)benzamide (5j)**

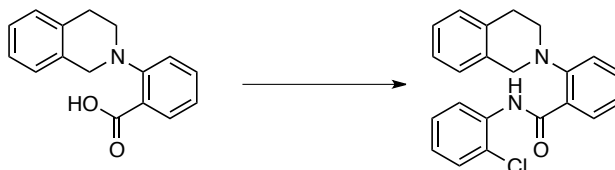

Subjection of 2-(3,4-dihydroisoquinolin-2(1*H*)-yl)benzoic acid (0.500 g, 1.97 mmol) to General Procedure D gave the title compound (0.204 g, 0.562 mmol, 29 % yield) as a white solid after recrystallization from hot EtOAc. **<sup>1</sup>H NMR** (300 MHz,  $CDCl_3$ )  $\delta$  12.21 (s, 1H), 8.63 (d,  $J = 8.2$  Hz, 1H), 8.28 (d,  $J = 7.8$  Hz, 1H), 7.46 (app t,  $J = 7.5$  Hz, 1H), 7.34 - 7.22 (m, 4H), 7.22 - 7.04 (m, 4H), 6.98 (app t,  $J = 6.9$  Hz, 1H), 4.38 (s, 2H), 3.42 (t,  $J = 5.9$  Hz, 2H), 2.94 (t,  $J = 5.9$  Hz, 2H). **<sup>13</sup>C NMR** (126 MHz,  $CDCl_3$ )  $\delta$  164.82, 150.88, 135.83, 134.00, 133.98, 132.64, 132.15, 129.12, 128.88, 128.14, 127.47, 126.62, 126.26, 126.12, 125.13, 124.23, 123.15, 122.50, 121.49, 54.93, 52.12, 27.76. **HRMS** (ESI) found  $[M+H]^+$  363.1258,  $C_{22}H_{20}N_2OCl$  requires 363.1259.

**2-(3,4-dihydroisoquinolin-2(1*H*)-yl)-*N*-(2-hydroxyphenyl)benzamide (5k)**

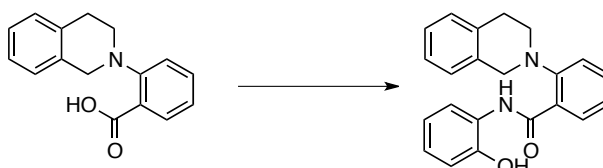

Subjection of 2-(3,4-dihydroisoquinolin-2(1*H*)-yl)benzoic acid (0.415 g, 1.65 mmol) to General Procedure D gave the title compound (0.335 g, 0.973 mmol, 59 % yield) as a white solid after recrystallization from hot EtOAc. **<sup>1</sup>H NMR** (500 MHz,  $CDCl_3$ )  $\delta$  13.23 (s, 1H), 9.98 (s, 1H), 8.41 (d,  $J = 7.8$  Hz, 1H), 7.61 (t,  $J = 7.6$  Hz, 1H), 7.50 - 7.36 (m, 2H), 7.35 - 7.20 (m, 3H), 7.12 (d,  $J = 7.5$  Hz, 1H), 7.08 - 6.92 (m, 2H), 6.52 (app t,  $J = 8.0$  Hz, 1H), 6.10 (d,  $J = 7.8$  Hz, 1H), 4.24 (s, 2H), 3.49 (t,  $J = 5.9$  Hz, 2H), 3.18 (t,  $J = 5.9$  Hz, 2H). **<sup>13</sup>C NMR** (126 MHz,  $CDCl_3$ )  $\delta$  164.87, 151.44, 149.33, 133.47, 133.36, 133.05, 132.04, 129.16, 127.30, 126.84, 126.72, 126.43, 126.23, 126.15, 126.00, 122.08, 121.99, 120.04, 119.97, 57.26, 50.56, 29.32. **HRMS** (ESI) found  $[M+H]^+$  345.1592,  $C_{22}H_{21}N_2O_2$  requires 345.1598.

***N*-(*tert*-butyl)-2-(3,4-dihydroisoquinolin-2(1*H*)-yl)benzamide (5l)**

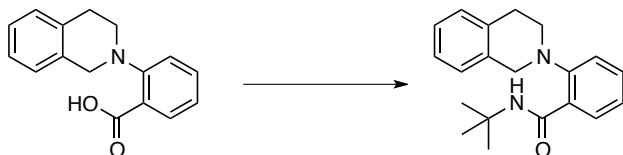

Subjection of 2-(3,4-dihydroisoquinolin-2(1*H*)-yl)benzoic acid (0.500 g, 1.97 mmol) to General Procedure D gave the title compound (0.391 g, 1.27 mmol, 64 % yield) as a white solid after purification by column chromatography on silica gel using Hex/EtOAc as eluent (9:1 to 4:1).  $^1\text{H NMR}$  (500 MHz,  $\text{CDCl}_3$ )  $\delta$  9.82 (s, 1H), 8.21 (d,  $J = 9.3$  Hz, 1H), 7.46 (app t,  $J = 8.4$  Hz, 1H), 7.30 - 7.17 (m, 5H), 7.07 (d,  $J = 7.2$  Hz, 1H), 4.09 (s, 2H), 3.43 (t,  $J = 5.9$  Hz, 2H), 3.12 (t,  $J = 6.0$  Hz, 2H), 1.17 (s, 9H).  $^{13}\text{C NMR}$  (126 MHz,  $\text{CDCl}_3$ )  $\delta$  165.01, 150.79, 134.03, 133.51, 131.77, 131.31, 129.08, 128.89, 126.92, 126.35, 126.11, 124.95, 120.43, 57.98, 50.57, 49.28, 29.69, 28.33. **HRMS** (ESI) found  $[\text{M}+\text{H}]^+$  309.1959,  $\text{C}_{20}\text{H}_{25}\text{N}_2\text{O}$  requires 309.1961.

***N*-cyclohexyl-2-(3,4-dihydroisoquinolin-2(1*H*)-yl)benzamide (5m)**

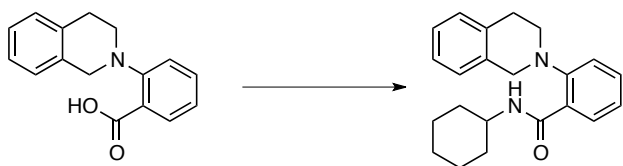

Subjection of 2-(3,4-dihydroisoquinolin-2(1*H*)-yl)benzoic acid (0.500 g, 1.97 mmol) to General Procedure D gave the title compound (0.425 g, 1.23 mmol, 63 % yield) as a white solid after purification by column chromatography on silica gel using Hex/EtOAc as eluent (9:1).  $^1\text{H NMR}$  (500 MHz,  $\text{CDCl}_3$ )  $\delta$  9.83 (d,  $J = 8.0$  Hz, 1H), 8.25 (d,  $J = 6.2$  Hz, 1H), 7.46 (app t, 1H), 7.32 - 7.14 (m, 5H), 7.04 (d,  $J = 7.4$  Hz, 1H), 4.10 (s, 2H), 3.93 - 3.77 (m, 1H), 3.40 (t,  $J = 5.9$  Hz, 2H), 3.10 (t,  $J = 5.9$  Hz, 2H), 1.88 - 1.66 (m, 2H), 1.57 - 1.38 (m, 3H), 1.33 - 1.12 (m, 2H), 1.02 - 0.87 (m, 1H), 0.82 (app q,  $J = 12.7$  Hz, 2H).  $^{13}\text{C NMR}$  (126 MHz,  $\text{CDCl}_3$ )  $\delta$  165.05, 151.04, 134.06, 133.45, 131.92, 131.60, 128.91, 128.31, 126.82, 126.44, 126.04, 125.01, 120.83, 57.57, 49.68, 47.94, 32.56, 29.57, 25.58, 24.61. **HRMS** (ESI) found  $[\text{M}+\text{H}]^+$  335.2119,  $\text{C}_{22}\text{H}_{27}\text{N}_2\text{O}$  requires 335.2118.

**2-(3,4-dihydroisoquinolin-2(1*H*)-yl)-5-methylbenzonitrile (S7n)**

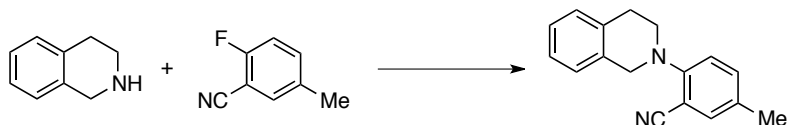

Subjection of 1,2,3,4-tetrahydroisoquinoline (6.70 g, 50.3 mmol) and 2-fluoro-5-methylbenzonitrile (3.4 g, 25.2 mmol) to General Procedure E gave the title compound (3.28 g, 13.2 mmol, 52 % yield) as a colorless oil after purification by column chromatography on silica gel using Hex/EtOAc as eluent (9:1).  $^1\text{H NMR}$  (500 MHz,  $\text{CDCl}_3$ )  $\delta$  7.41 (s, 1H), 7.31 (d,  $J = 8.4$  Hz, 1H), 7.24 - 7.17 (m, 3H), 7.17 - 7.12 (m, 1H), 7.01 (d,  $J = 8.4$  Hz, 1H), 4.37 (s, 2H), 3.62 (t,  $J = 5.8$  Hz, 2H), 3.10 (t,  $J = 5.8$  Hz, 2H), 2.33 (s, 3H).  $^{13}\text{C NMR}$  (126 MHz,  $\text{CDCl}_3$ )  $\delta$  153.12, 134.53, 134.51, 133.93, 133.39, 131.00, 129.01, 126.53, 126.39, 126.01, 118.83, 118.39, 104.88, 52.55, 51.20, 29.34, 20.24. **HRMS** (ESI) found  $[\text{M}-\text{H}]^-$  247.1229,  $\text{C}_{17}\text{H}_{15}\text{N}_2$  requires 247.1230.

### 2-(3,4-dihydroisoquinolin-2(1H)-yl)-5-methyl-N-(*o*-tolyl)benzamide (5n)

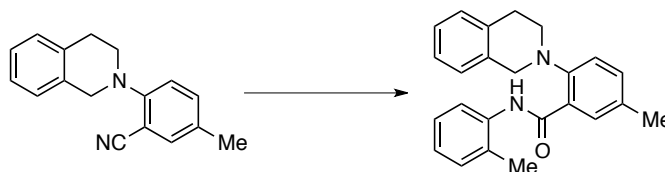

Subjection of nitrile **S7n** (0.954 g, 3.84 mmol) to General Procedure F gave the title compound (0.306 g, 0.858 mmol, 22 % yield) as a white solid after purification by column chromatography on silica gel using Hex/EtOAc as eluent (9:1).  $^1\text{H NMR}$  (500 MHz,  $\text{CDCl}_3$ )  $\delta$  11.72 (s, 1H), 8.19 (s, 1H), 8.10 (d,  $J = 8.1$  Hz, 1H), 7.33 (d,  $J = 8.1$  Hz, 1H), 7.28 - 7.25 (m, 1H), 7.24 - 7.18 (m, 3H), 7.16 (d,  $J = 6.4$  Hz, 1H), 7.10 (app t,  $J = 7.9$  Hz, 2H), 7.03 (app t,  $J = 7.3$  Hz, 1H), 4.31 (s, 2H), 3.40 (t,  $J = 5.9$  Hz, 2H), 3.01 (t,  $J = 5.9$  Hz, 2H), 2.43 (s, 3H), 1.96 (s, 3H).  $^{13}\text{C NMR}$  (126 MHz,  $\text{CDCl}_3$ )  $\delta$  164.60, 148.38, 136.67, 135.16, 133.90, 133.42, 132.99, 132.49, 130.30, 128.94, 128.71, 128.14, 126.86, 126.51, 126.40, 126.30, 124.31, 122.85, 121.12, 55.79, 52.07, 28.70, 20.84, 17.61. **HRMS** (ESI) found  $[\text{M}+\text{H}]^+$  357.1958,  $\text{C}_{24}\text{H}_{25}\text{N}_2\text{O}$  requires 357.1961.

### 5-bromo-2-(3,4-dihydroisoquinolin-2(1H)-yl)benzonitrile (S7o)

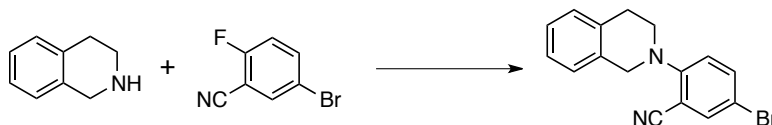

Subjection of 1,2,3,4-tetrahydroisoquinoline (1.82 g, 13.7 mmol) and 5-bromo-2-fluorobenzonitrile (1.3 g, 6.50 mmol) to General Procedure E gave the title compound (1.44 g, 4.61 mmol, 71 % yield) as a yellow oil after purification by column chromatography on silica gel using Hex/EtOAc as eluent (20:1).  $^1\text{H NMR}$  (500 MHz,  $\text{CDCl}_3$ )  $\delta$  7.68 (s, 1H), 7.56 (d,  $J = 11.1$  Hz, 1H), 7.27 - 7.18 (m, 3H), 7.17 - 7.11 (m,

1H), 6.96 (d,  $J = 8.9$  Hz, 1H), 4.42 (s, 2H), 3.69 (t,  $J = 5.8$  Hz, 2H), 3.10 (t,  $J = 5.8$  Hz, 2H).  $^{13}\text{C}$  NMR (126 MHz,  $\text{CDCl}_3$ )  $\delta$  154.00, 136.65, 136.61, 134.37, 133.27, 129.01, 126.78, 126.35, 126.22, 119.67, 117.51, 112.21, 105.52, 52.14, 50.66, 29.17. HRMS (ESI) found  $[\text{M}-\text{H}]^-$  311.0177,  $\text{C}_{16}\text{H}_{12}\text{N}_2\text{Br}$  requires 311.0178.

### 5-bromo-2-(3,4-dihydroisoquinolin-2(1H)-yl)-*N*-(*o*-tolyl)benzamide (5o)

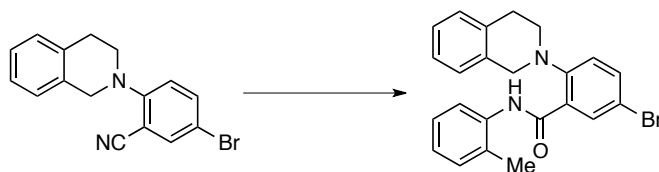

Subjection of nitrile **S7o** (0.406 g, 1.3 mmol) to General Procedure F gave the title compound (0.444 g, 1.05 mmol, 81 % yield) as a white solid after purification by column chromatography on silica gel using Hex/EtOAc as eluent (9:1).  $^1\text{H}$  NMR (500 MHz,  $\text{CDCl}_3$ )  $\delta$  11.40 (s, 1H), 8.47 (s, 1H), 8.07 (d,  $J = 8.1$  Hz, 1H), 7.61 (d,  $J = 8.5$  Hz, 1H), 7.27 - 7.20 (m, 4H), 7.16 (d,  $J = 7.2$  Hz, 1H), 7.14 - 7.08 (m, 2H), 7.05 (d,  $J = 7.3$  Hz, 1H), 4.32 (s, 2H), 3.42 (t,  $J = 5.9$  Hz, 2H), 3.00 (t,  $J = 5.9$  Hz, 2H), 1.97 (s, 3H).  $^{13}\text{C}$  NMR (126 MHz,  $\text{CDCl}_3$ )  $\delta$  163.04, 149.70, 136.26, 135.14, 134.92, 133.35, 133.22, 130.40, 129.00, 128.61, 127.07, 126.64, 126.47, 126.38, 124.65, 122.94, 122.70, 118.76, 55.55, 52.01, 28.38, 17.57. HRMS (ESI) found  $[\text{M}+\text{H}]^+$  421.0908,  $\text{C}_{23}\text{H}_{22}\text{N}_2\text{OBr}$  requires 421.0910.

### 2-(3,4-dihydroisoquinolin-2(1H)-yl)-5-(trifluoromethyl)benzonitrile (S7p)

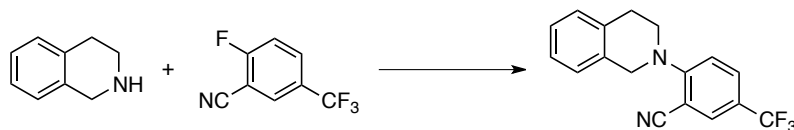

Subjection of 1,2,3,4-tetrahydroisoquinoline (4.62 g, 34.7 mmol) and 2-fluoro-5-(trifluoromethyl)benzonitrile (3.12 g, 16.5 mmol) to General Procedure E gave the title compound (4.89 g, 16.17 mmol, 98 % yield) as a yellow oil after purification by column chromatography on silica gel using Hex/EtOAc as eluent (20:1).  $^1\text{H}$  NMR (500 MHz,  $\text{CDCl}_3$ )  $\delta$  7.83 (s, 1H), 7.68 (d,  $J = 9.9$  Hz, 1H), 7.27 - 7.21 (m, 3H), 7.21 - 7.14 (m, 1H), 7.12 (d,  $J = 8.9$  Hz, 1H), 4.57 (s, 2H), 3.84 (t,  $J = 5.8$  Hz, 2H), 3.13 (t,  $J = 5.8$  Hz, 2H).  $^{13}\text{C}$  NMR (126 MHz,  $\text{CDCl}_3$ )  $\delta$  156.43, 134.40, 132.91, 132.38, 132.34, 130.44, 130.41, 128.91, 126.98, 126.41, 126.35, 118.06, 117.40, 101.80, 51.73, 49.82, 29.14. HRMS (ESI) found  $[\text{M}+\text{H}]^+$  303.1103,  $\text{C}_{17}\text{H}_{14}\text{N}_2\text{F}_3$  requires 303.1104.

### 2-(3,4-dihydroisoquinolin-2(1H)-yl)-*N*-(*o*-tolyl)-5-(trifluoromethyl)benzamide (5p)

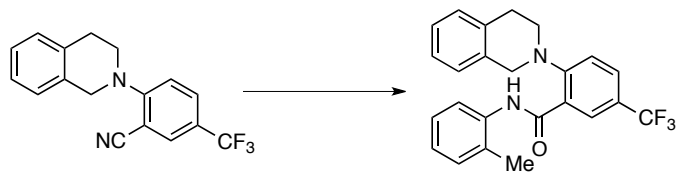

Subjection of nitrile **S7p** (0.320 g, 1.06 mmol) to General Procedure F gave the title compound (0.100 g, 0.243 mmol, 23 % yield) as a yellow oil after purification by column chromatography on silica gel using Hex/EtOAc as eluent (9:1).  $^1\text{H NMR}$  (500 MHz,  $\text{CDCl}_3$ )  $\delta$  10.98 (s, 1H), 8.57 (s, 1H), 8.14 (d,  $J = 8.1$  Hz, 1H), 7.74 (d,  $J = 7.6$  Hz, 1H), 7.41 (d,  $J = 8.4$  Hz, 1H), 7.28 - 7.20 (m, 3H), 7.20 - 7.09 (m, 3H), 7.06 (app t,  $J = 7.3$  Hz, 1H), 4.39 (s, 2H), 3.51 (t,  $J = 5.9$  Hz, 2H), 3.00 (t,  $J = 5.9$  Hz, 2H), 2.01 (s, 3H).  $^{13}\text{C NMR}$  (126 MHz,  $\text{CDCl}_3$ )  $\delta$  163.37, 153.35, 136.16, 133.22, 133.04, 130.45, 129.54, 129.51, 129.09, 129.01, 128.99, 128.96, 128.28, 127.18, 126.74, 126.56, 126.37, 124.70, 122.38, 121.05, 55.12, 52.09, 28.15, 17.52. **HRMS** (ESI) found  $[\text{M}+\text{H}]^+$  411.1677,  $\text{C}_{24}\text{H}_{22}\text{N}_2\text{O}_1\text{F}_3$  requires 411.1679.

**(S)-methyl 2-(2-(3,4-dihydroisoquinolin-2(1H)-yl)benzamido)-3-methylbutanoate**  
**(5q)**

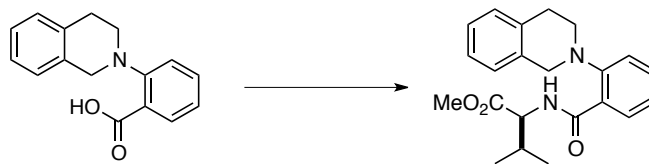

Subjection of 2-(3,4-dihydroisoquinolin-2(1H)-yl)benzoic acid (0.500 g, 1.97 mmol) to General Procedure D gave the title compound (0.662 g, 1.81 mmol, 92 % yield) as a white solid after recrystallization from hot EtOH.  $^1\text{H NMR}$  (500 MHz,  $\text{CDCl}_3$ )  $\delta$  10.59 (d,  $J = 8.3$  Hz, 1H), 8.29 (d,  $J = 7.8$  Hz, 1H), 7.62 - 7.40 (m, 1H), 7.38 - 7.29 (m, 2H), 7.24 - 7.12 (m, 3H), 7.06 (d,  $J = 7.2$  Hz, 1H), 4.64 (t,  $J = 6.6$  Hz, 1H), 4.26 (d,  $J = 15.4$  Hz, 1H), 4.13 (d,  $J = 15.1$  Hz, 1H), 3.59 (s, 3H), 3.51 - 3.35 (m, 2H), 3.22 (dd,  $J = 14.5$ , 7.7 Hz, 1H), 3.16 - 2.97 (m, 1H), 1.94 (h,  $J = 7.1$  Hz, 1H), 0.79 (d,  $J = 6.8$  Hz, 3H), 0.63 (d,  $J = 6.9$  Hz, 3H).  $^{13}\text{C NMR}$  (126 MHz,  $\text{CDCl}_3$ )  $\delta$  172.40, 166.18, 151.71, 134.06, 133.71, 132.46, 131.77, 128.86, 127.68, 126.69, 126.44, 125.97, 125.44, 121.70, 57.94, 57.41, 51.77, 50.21, 30.77, 29.21, 19.00, 17.80. **HRMS** (ESI) found  $[\text{M}+\text{H}]^+$  367.2081,  $\text{C}_{22}\text{H}_{26}\text{N}_2\text{O}_3$  requires 367.2016.

## Synthesis of Products

### General Procedure G: Asymmetric Amidation

To the catalyst **9** (0.005 mmol) in a 2 dram (15 X 60 mm) vial equipped with a Teflon stir bar (1/2" X 5/16") were added substrate **5** (0.1 mmol), Na<sub>3</sub>PO<sub>4</sub> (0.24 mmol), 4-acetamido-2,2,6,6-tetramethyl-1-oxopiperidinium tetrafluoroborate (**7**, 0.22 mmol), and *p*-xylene (4 mL) in succession. The vial was fitted with a screw cap and the reaction mixture was stirred rapidly at room temperature for 48 h with the vial standing on the stir plate. After this time, the reaction mixture was diluted with saturated aqueous Na<sub>2</sub>SO<sub>3</sub> (2 mL) and the contents were shaken vigorously. This mixture was extracted with EtOAc (3 X 2 mL) and the organic extracts were dried with Na<sub>2</sub>SO<sub>4</sub> and concentrated *in vacuo*. The crude residue was purified by flash column chromatography. Due to the heterogeneous nature of the reaction mixture, it is essential that fast and efficient stirring be maintained in order to achieve reliable results.

*Preparation of reagents:* Crystalline 4-acetamido-2,2,6,6-tetramethyl-1-oxopiperidinium tetrafluoroborate was ground with a mortar and pestle into a fine, light-yellow powder prior to use. Anhydrous Na<sub>3</sub>PO<sub>4</sub> was ground with a mortar and pestle and dried at 80 °C under vacuum for 30 min prior to use.

### 5-benzyl-12,13-dihydro-4*bH*-isoquinolino[2,1-*a*]quinazolin-6(5*H*)-one (**6a**)

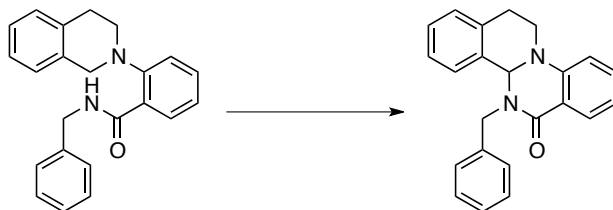

Subjection of **5a** (34 mg, 0.1 mmol) to General Procedure G gave the title compound (28 mg, 0.083 mmol, 83 % yield) as a white powder after purification by column chromatography on silica gel using Hex/EtOAc as eluent (4:1). <sup>1</sup>H NMR (500 MHz, CDCl<sub>3</sub>) δ 7.98 (d, *J* = 6.7 Hz, 1H), 7.36 (app t, *J* = 7.8 Hz, 1H), 7.34 - 7.24 (m, 6H), 7.24 - 7.16 (m, 2H), 7.04 (d, *J* = 7.0 Hz, 1H), 6.91 (d, *J* = 8.5 Hz, 1H), 6.88 (app t, *J* = 7.5 Hz, 1H), 5.82-5.71 (m, 1H), 5.69 (s, 1H), 4.39 (d, *J* = 15.3 Hz, 1H), 4.11 - 3.96 (m, 1H), 3.53 (ddd, *J* = 14.0, 11.0, 5.7 Hz, 1H), 3.21 - 3.02 (m, 1H), 2.73 (dd, *J* = 16.3, 4.8 Hz, 1H). <sup>13</sup>C NMR (126 MHz, CDCl<sub>3</sub>) δ 163.45, 147.45, 137.23, 134.75, 133.37, 129.48, 129.22, 129.04, 128.63, 128.25, 127.63, 127.45, 126.20, 125.88, 119.41, 113.65, 109.08, 71.67, 49.64, 44.58, 29.73. HRMS (ESI) found [M+H]<sup>+</sup> 341.1649, C<sub>23</sub>H<sub>21</sub>N<sub>2</sub>O requires 341.1648. HPLC (Chiralpak IC column, 75:25 hexanes/isopropanol, 1 mL/min); t<sub>r</sub> = 18.8 min (minor), 22.5 min (major); 84 % ee.



**5-(4-methylbenzyl)-12,13-dihydro-4*b*H-isoquinolino[2,1-*a*]quinazolin-6(5*H*)-one (6b)**

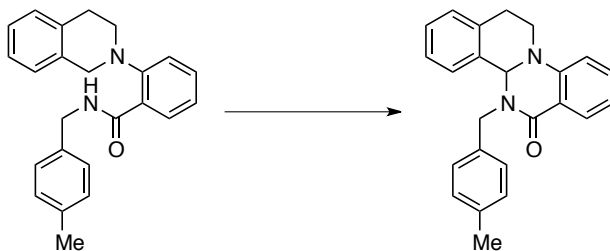

Subjection of **5b** (36 mg, 0.1 mmol) to General Procedure G gave the title compound (29 mg, 0.081 mmol, 81 % yield) as a white powder after purification by column chromatography on silica gel using Hex/EtOAc as eluent (4:1). **<sup>1</sup>H NMR** (500 MHz, CDCl<sub>3</sub>) δ 7.98 (d, *J* = 7.3 Hz, 1H), 7.35 (app t, *J* = 7.7 Hz, 1H), 7.33 - 7.26 (m, 1H), 7.26 - 7.17 (m, 4H), 7.17 - 7.10 (m, 2H), 7.04 (d, *J* = 6.9 Hz, 1H), 6.95 - 6.84 (m, 2H), 5.92 - 5.71 (m, 1H), 5.68 (s, 1H), 4.31 (d, *J* = 14.9 Hz, 1H), 4.03 (dd, *J* = 13.3, 5.0 Hz, 1H), 3.53 (ddd, *J* = 14.6, 11.3, 5.7 Hz, 1H), 3.21 - 3.09 (m, 1H), 2.73 (dd, *J* = 16.9, 4.4 Hz, 1H), 2.35 (s, 3H). **<sup>13</sup>C NMR** (126 MHz, CDCl<sub>3</sub>) δ 163.34, 151.19, 147.36, 137.15, 134.72, 134.14, 133.34, 132.11, 131.62, 129.45, 129.34, 129.24, 129.14, 128.18, 127.85, 127.72, 126.19, 121.00, 119.29, 71.52, 50.48, 44.57, 24.08, 21.16. **HRMS** (ESI) found [M+H]<sup>+</sup> 355.1804, C<sub>24</sub>H<sub>23</sub>N<sub>2</sub>O requires 355.1805. **HPLC** (Chiralpak IC column, 70:30 hexanes/isopropanol, 1 mL/min); t<sub>r</sub> = 19.9 min (minor), 28.5 min (major); 87 % ee.

**5-(4-methoxybenzyl)-12,13-dihydro-4*b*H-isoquinolino[2,1-*a*]quinazolin-6(5*H*)-one (6c)**

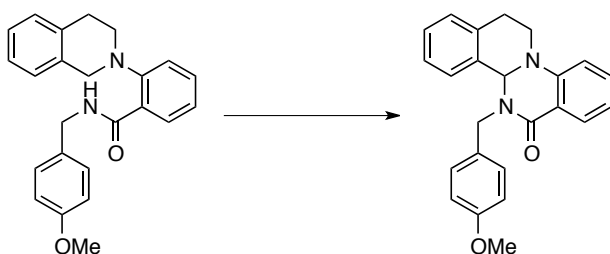

Subjection of **5c** (37 mg, 0.1 mmol) to General Procedure G gave the title compound (33 mg, 0.089 mmol, 89 % yield) as a white powder after purification by column chromatography on silica gel using Hex/EtOAc as eluent (4:1). **<sup>1</sup>H NMR** (500 MHz, CDCl<sub>3</sub>) δ 7.98 (d, *J* = 7.4 Hz, 1H), 7.35 (app t, *J* = 7.3 Hz, 1H), 7.32 - 7.11 (m, 5H), 7.04 (d, *J* = 7.0 Hz, 2H), 6.92 - 6.82 (m, 4H), 5.83 - 5.49 (m, 2H), 4.32 (d, *J* = 14.5 Hz, 1H), 4.06 - 3.96 (m, 1H), 3.80 (s, 3H), 3.52 (ddd, *J* = 16.3, 12.8, 5.7 Hz, 1H), 3.23 - 3.04 (m, 1H), 2.73 (dd, *J* = 17.0, 4.2 Hz, 1H). **<sup>13</sup>C NMR** (151 MHz, CDCl<sub>3</sub>) δ 163.31, 158.99, 147.34, 134.73, 133.27, 129.38, 129.27, 129.16, 129.08, 128.15, 126.76, 126.14, 125.86,

119.31, 113.98, 113.55, 71.37, 55.23, 48.88, 44.53, 24.33. **HRMS** (ESI) found  $[M+H]^+$  371.1756,  $C_{24}H_{22}N_2O_2$  requires 371.1754. **HPLC** (Chiralpak IC column, 70:30 hexanes/isopropanol, 1 mL/min);  $t_r$  = 23.2 min (minor), 28.6 min (major); 86 % ee.

**5-(4-nitrobenzyl)-12,13-dihydro-4bH-isoquinolino[2,1-a]quinazolin-6(5H)-one (6d)**

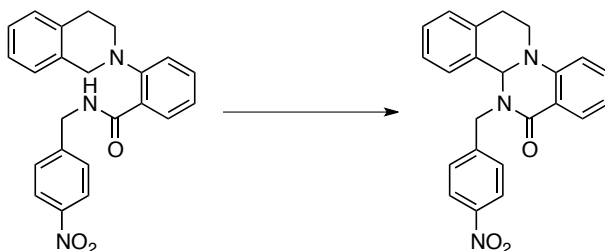

Subjection of **5d** (37 mg, 0.1 mmol) to General Procedure G gave the title compound (35 mg, 0.090 mmol, 90 % yield) as a yellow powder after purification by column chromatography on silica gel using Hex/EtOAc as eluent (3:2).  **$^1H$  NMR** (500 MHz,  $CDCl_3$ )  $\delta$  8.14 (d,  $J$  = 8.4 Hz, 2H), 8.00 (d,  $J$  = 7.6 Hz, 1H), 7.47 - 7.34 (m, 3H), 7.28 - 7.17 (m, 3H), 7.07 (d,  $J$  = 7.0 Hz, 1H), 7.00 - 6.87 (m, 2H), 5.74 (s, 1H), 5.66 - 5.34 (m, 1H), 4.61 (d,  $J$  = 16.5 Hz, 1H), 4.02 - 3.92 (m, 1H), 3.58 - 3.45 (m, 1H), 3.13 - 2.97 (m, 1H), 2.82 - 2.73 (m, 1H).  **$^{13}C$  NMR** (126 MHz,  $CDCl_3$ )  $\delta$  163.92, 147.87, 147.26, 145.19, 135.15, 133.74, 129.53, 129.30, 128.73, 128.56, 128.15, 126.37, 123.79, 123.51, 120.06, 118.69, 114.38, 72.15, 48.56, 44.66, 25.41. **HRMS** (ESI) found  $[M+H]^+$  386.1501,  $C_{23}H_{20}N_3O_3$  requires 386.1499. **HPLC** (Chiralpak IC column, 70:30 hexanes/isopropanol, 1 mL/min);  $t_r$  = 30.8 min (minor), 39.9 min (major); 88 % ee.

**5-(2-methoxybenzyl)-12,13-dihydro-4bH-isoquinolino[2,1-a]quinazolin-6(5H)-one (6e)**

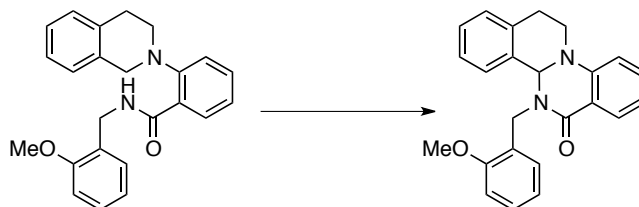

Subjection of **5e** (37 mg, 0.1 mmol) to General Procedure G gave the title compound (30 mg, 0.081 mmol, 81 % yield) as a white powder after purification by column chromatography on silica gel using Hex/EtOAc as eluent (1:1).  **$^1H$  NMR** (500 MHz,  $CDCl_3$ )  $\delta$  7.94 (d,  $J$  = 7.7 Hz, 1H), 7.50 (d,  $J$  = 7.4 Hz, 1H), 7.37 - 7.30 (m, 2H), 7.25 (d,  $J$  = 7.5 Hz, 1H), 7.17 (app p,  $J$  = 7.2 Hz, 2H), 7.03 (d,  $J$  = 6.8 Hz, 1H), 6.96 (app t,  $J$  =

7.5 Hz, 1H), 6.90 (d,  $J = 8.5$  Hz, 1H), 6.88 (d,  $J = 8.5$  Hz, 1H), 6.82 (app t,  $J = 7.5$  Hz, 1H), 5.82 (s, 1H), 5.68 (d,  $J = 15.7$  Hz, 1H), 4.48 (d,  $J = 15.7$  Hz, 1H), 4.17 (dd,  $J = 14.4$ , 6.3 Hz, 1H), 3.82 (s, 3H), 3.62 (ddd,  $J = 14.5$ , 11.8, 5.8 Hz, 1H), 3.25 (ddd,  $J = 17.9$ , 11.0, 6.6 Hz, 1H), 2.74 (dd,  $J = 17.0$ , 5.3 Hz, 1H).  $^{13}\text{C}$  NMR (126 MHz,  $\text{CDCl}_3$ )  $\delta$  164.54, 163.28, 157.36, 147.19, 134.36, 133.24, 129.37, 129.16, 128.92, 128.48, 127.97, 126.18, 125.62, 125.26, 120.79, 119.00, 118.34, 113.06, 110.16, 72.60, 55.29, 45.75, 44.66, 23.99. HRMS (ESI) found  $[\text{M}+\text{H}]^+$  371.1756,  $\text{C}_{24}\text{H}_{23}\text{N}_2\text{O}_2$  requires 371.1754. HPLC (Chiralpak IC column, 75:25 hexanes/isopropanol, 1 mL/min);  $t_r = 24.1$  min (minor), 28.4 min (major); 94 % ee.

### 5-phenyl-12,13-dihydro-4*bH*-isoquinolino[2,1-*a*]quinazolin-6(5*H*)-one (6f)

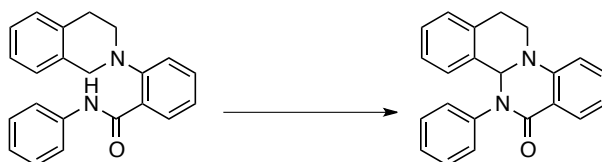

Subjection of **5f** (33 mg, 0.1 mmol) to General Procedure G gave the title compound (28 mg, 0.086 mmol, 86 % yield) as a white powder after purification by column chromatography on silica gel using Hex/EtOAc as eluent (4:1).  $^1\text{H}$  NMR (500 MHz,  $\text{CDCl}_3$ )  $\delta$  8.03 (d,  $J = 7.7$  Hz, 1H), 7.52 (d,  $J = 7.9$  Hz, 2H), 7.44 - 7.31 (m, 4H), 7.23 (app t,  $J = 7.4$  Hz, 1H), 7.17 (app t,  $J = 7.4$  Hz, 1H), 7.13 - 7.05 (m, 2H), 7.01 (d,  $J = 8.3$  Hz, 1H), 6.90 (app t,  $J = 7.5$  Hz, 1H), 6.19 (s, 1H), 4.26 (dd,  $J = 14.0$ , 6.2 Hz, 1H), 3.75 (ddd,  $J = 14.4$ , 11.3, 5.8 Hz, 1H), 3.32 (ddd,  $J = 17.5$ , 11.1, 6.9 Hz, 1H), 2.86 (dd,  $J = 17.1$ , 5.0 Hz, 1H).  $^{13}\text{C}$  NMR (126 MHz,  $\text{CDCl}_3$ )  $\delta$  162.80, 147.40, 141.67, 135.66, 134.38, 133.77, 129.91, 129.14, 128.87, 128.19, 127.21, 126.16, 125.87, 125.01, 119.67, 119.16, 114.06, 75.34, 45.09, 24.58. HRMS (ESI) found  $[\text{M}+\text{H}]^+$  327.1492,  $\text{C}_{22}\text{H}_{19}\text{N}_2\text{O}_1$  requires 327.1492. HPLC (Chiralpak IA column, 70:30 hexanes/isopropanol, 1 mL/min);  $t_r = 10.1$  min (minor), 15.6 min (major); 63 % ee.

### 5-(*m*-tolyl)-12,13-dihydro-4*bH*-isoquinolino[2,1-*a*]quinazolin-6(5*H*)-one (6g)

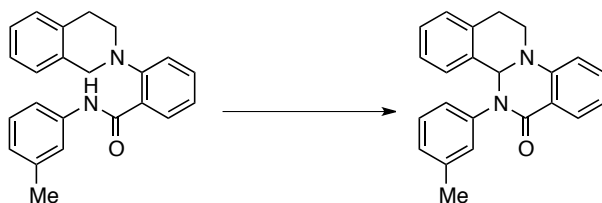

Subjection of **5g** (34 mg, 0.1 mmol) to General Procedure G gave the title compound (31 mg, 0.091 mmol, 91 % yield) as a white powder after purification by column chromatography on silica gel using Hex/EtOAc as eluent (4:1).  $^1\text{H}$  NMR (500 MHz,

CDCl<sub>3</sub>)  $\delta$  8.01 (d,  $J$  = 7.0 Hz, 1H), 7.46 - 7.35 (m, 3H), 7.34 - 7.26 (m, 2H), 7.18 (app t,  $J$  = 7.3 Hz, 1H), 7.11 (app t,  $J$  = 7.4 Hz, 1H), 7.06 (d,  $J$  = 7.0 Hz, 2H), 7.00 (d,  $J$  = 8.3 Hz, 1H), 6.89 (app t,  $J$  = 7.5 Hz, 1H), 6.17 (s, 1H), 4.27 (dd,  $J$  = 14.4, 6.1 Hz, 1H), 3.76 (ddd,  $J$  = 14.5, 11.5, 5.9 Hz, 1H), 3.32 (ddd,  $J$  = 17.6, 11.1, 6.9 Hz, 1H), 2.85 (dd,  $J$  = 17.1, 5.2 Hz, 1H), 2.39 (s, 3H). <sup>13</sup>C NMR (126 MHz, CDCl<sub>3</sub>)  $\delta$  162.78, 147.32, 141.73, 138.74, 135.94, 134.34, 133.72, 129.89, 129.13, 128.70, 128.15, 127.14, 126.71, 126.16, 125.67, 121.81, 119.58, 119.17, 113.94, 75.45, 45.09, 24.42, 21.52. HRMS (ESI) found [M+H]<sup>+</sup> 341.1647, C<sub>23</sub>H<sub>21</sub>N<sub>2</sub>O requires 341.1648. HPLC (Chiralpak IC column, 70:30 hexanes/isopropanol, 1 mL/min); t<sub>r</sub> = 17.4 min (minor), 48.0 min (major); 60 % ee.

### 5-(*o*-tolyl)-12,13-dihydro-4*bH*-isoquinolino[2,1-*a*]quinazolin-6(5*H*)-one (6h)

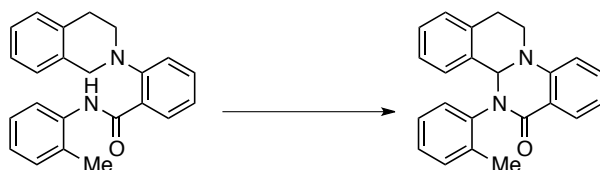

Subjection of **5h** (34 mg, 0.1 mmol) to General Procedure G gave the title compound (22 mg, 0.065 mmol, 65 % yield) as a white powder after purification by column chromatography on silica gel using Hex/EtOAc as eluent (4:1). <sup>1</sup>H NMR (500 MHz, CDCl<sub>3</sub>, major rotamer)  $\delta$  8.08 (d,  $J$  = 7.7 Hz, 1H), 7.46 (app t,  $J$  = 7.7 Hz, 1H), 7.23 - 7.10 (m, 4H), 7.10 - 7.04 (m, 4H), 7.03 - 6.96 (m, 2H), 6.00 (s, 1H), 4.16 - 4.06 (m, 1H), 3.61 (ddd,  $J$  = 13.7, 9.1, 5.9 Hz, 1H), 3.36 - 3.19 (m, 1H), 3.03 - 2.89 (m, 1H), 2.44 (s, 3H). <sup>13</sup>C NMR (126 MHz, CDCl<sub>3</sub>)  $\delta$  162.90, 148.62, 139.53, 136.40, 134.67, 133.58, 133.50, 130.94, 129.69, 128.83, 128.28, 128.19, 127.65, 127.42, 126.30, 125.88, 120.58, 120.38, 115.72, 74.10, 44.98, 26.62, 18.91. HRMS (ESI) found [M+H]<sup>+</sup> 341.1648, C<sub>23</sub>H<sub>21</sub>N<sub>2</sub>O requires 341.1648. HPLC (Chiralpak IA column, 70:30 hexanes/isopropanol, 1 mL/min); t<sub>r</sub> = 8.5 min (minor), 10.8 min (major); 91 % ee.

### 5-(naphthalen-1-yl)-12,13-dihydro-4*bH*-isoquinolino[2,1-*a*]quinazolin-6(5*H*)-one (6i)

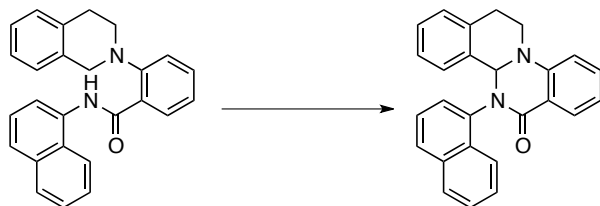

Subjection of **5i** (38 mg, 0.1 mmol) to General Procedure G gave the title compound (26 mg, 0.069 mmol, 69 % yield) as a white powder after purification by column chromatography on silica gel using Hex/EtOAc as eluent (4:1). <sup>1</sup>H NMR (500 MHz,

CDCl<sub>3</sub>)  $\delta$  8.25 (d,  $J$  = 8.3 Hz, 1H), 8.12 (d,  $J$  = 7.7 Hz, 1H), 7.91 (d,  $J$  = 8.0 Hz, 1H), 7.80 (d,  $J$  = 8.1 Hz, 1H), 7.61 (app t,  $J$  = 7.6 Hz, 1H), 7.58 - 7.52 (m, 2H), 7.49 (app t,  $J$  = 7.8 Hz, 1H), 7.43 (app t,  $J$  = 7.7 Hz, 1H), 7.25 (d,  $J$  = 7.7 Hz, 1H), 7.17 - 7.04 (m, 3H), 7.02 (app t,  $J$  = 7.5 Hz, 1H), 6.91 (app t,  $J$  = 7.7 Hz, 1H), 6.21 (s, 1H), 4.22 (ddd,  $J$  = 12.2, 6.3, 3.7 Hz, 1H), 3.66 (ddd,  $J$  = 14.0, 9.9, 5.6 Hz, 1H), 3.32 (ddd,  $J$  = 16.2, 9.9, 6.2 Hz, 1H), 2.99 - 2.87 (m, 1H). <sup>13</sup>C NMR (126 MHz, CDCl<sub>3</sub>)  $\delta$  163.48, 148.54, 137.30, 134.70, 134.46, 133.70, 130.48, 129.92, 128.91, 128.73, 128.15, 128.10, 127.15, 127.13, 127.02, 126.14, 125.79, 125.24, 123.46, 120.44, 119.91, 115.39, 74.58, 45.06, 26.09. HRMS (ESI) found [M+Na]<sup>+</sup> 399.1472, C<sub>26</sub>H<sub>22</sub>N<sub>2</sub>O<sub>1</sub>Na<sub>1</sub> requires 399.1468. HPLC (Chiralpak IA column, 70:30 hexanes/isopropanol, 1 mL/min);  $t_r$  = 13.7 min (minor), 16.5 min (major); 82 % ee.

**5-(2-chlorophenyl)-12,13-dihydro-4bH-isoquinolino[2,1-a]quinazolin-6(5H)-one (6j)**

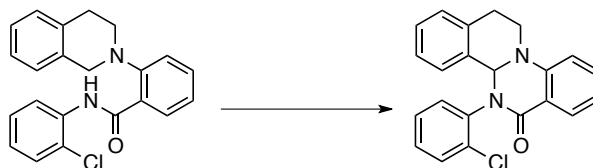

Subjection of **5j** (36 mg, 0.1 mmol) to General Procedure G gave the title compound (15 mg, 0.042 mmol, 42 % yield) as a white powder after purification by column chromatography on silica gel using Hex/EtOAc as eluent (4:1). <sup>1</sup>H NMR (500 MHz, CDCl<sub>3</sub>)  $\delta$  8.16 (d,  $J$  = 6.9 Hz, 1H), 7.52 (app t,  $J$  = 7.6 Hz, 1H), 7.46 (d,  $J$  = 7.6 Hz, 1H), 7.19 - 7.07 (m, 6H), 7.07 - 6.95 (m, 2H), 6.95 - 6.75 (m, 3H), 6.24 (s, 1H), 4.03 - 3.89 (m, 1H), 3.54 (dd,  $J$  = 12.1, 6.4 Hz, 1H), 3.31 - 3.15 (m, 1H), 3.11 (dd,  $J$  = 14.2, 7.8 Hz, 1H). <sup>13</sup>C NMR (126 MHz, CDCl<sub>3</sub>)  $\delta$  164.55, 163.52, 149.59, 137.32, 134.91, 134.52, 133.63, 131.06, 130.75, 129.83, 129.61, 129.16, 128.73, 128.52, 127.09, 125.87, 121.84, 121.27, 118.06, 72.44, 45.44, 28.65. HRMS (ESI) found [M-H]<sup>-</sup> 359.0945 C<sub>22</sub>H<sub>16</sub>N<sub>2</sub>OCl requires 359.0946. HPLC (Chiralpak IA column, 70:30 hexanes/isopropanol, 1 mL/min);  $t_r$  = 8.0 min (minor), 12.5 min (major); 87 % ee.

**5-(2-hydroxyphenyl)-12,13-dihydro-4bH-isoquinolino[2,1-a]quinazolin-6(5H)-one (6k)**

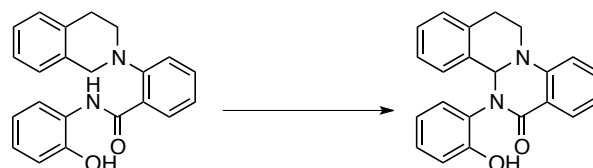

Subjection of **5k** (34 mg, 0.1 mmol) to General Procedure G gave the title compound (13 mg, 0.038 mmol, 38 % yield) as a white powder after purification by column chromatography on silica gel using Hex/EtOAc as eluent (4:1).  $^1\text{H NMR}$  (300 MHz,  $\text{CDCl}_3$ )  $\delta$  8.35 (br s, 1H), 7.98 (d,  $J = 7.8$  Hz, 1H), 7.48 - 7.33 (m, 2H), 7.33 - 6.74 (m, 9H), 6.32 (s, 1H), 4.31 (dd,  $J = 14.4, 6.6$  Hz, 1H), 3.75 (ddd,  $J = 14.4, 12.4, 5.5$  Hz, 1H), 3.31 (ddd,  $J = 18.0, 11.9, 6.8$  Hz, 1H), 2.77 (dd,  $J = 17.2, 5.0$  Hz, 1H).  $^{13}\text{C NMR}$  (126 MHz,  $\text{CDCl}_3$ )  $\delta$  164.76, 152.02, 147.84, 134.70, 133.76, 130.18, 129.04, 128.64, 128.32, 128.28, 126.63, 126.52, 126.41, 125.44, 121.43, 120.84, 119.70, 117.39, 113.64, 44.95, 29.72, 24.19. **HRMS** (ESI) found  $[\text{M}+\text{H}]^+$  343.1439,  $\text{C}_{22}\text{H}_{19}\text{N}_2\text{O}_2$  requires 343.1441. **HPLC** (Chiralpak IA column, 70:30 hexanes/isopropanol, 1 mL/min);  $t_r = 8.8$  min (minor), 10.8 min (major); 80 % ee.

**5-(tert-butyl)-12,13-dihydro-4bH-isoquinolino[2,1-a]quinazolin-6(5H)-one (6l)**

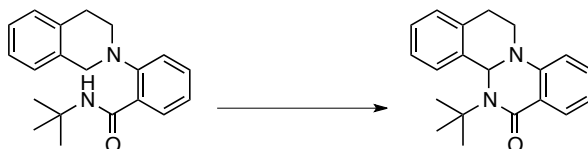

Subjection of **5l** (31 mg, 0.1 mmol) to General Procedure G gave the title compound (25 mg, 0.082 mmol, 82 % yield) as a white powder after purification by column chromatography on silica gel using Hex/EtOAc as eluent (4:1).  $^1\text{H NMR}$  (300 MHz,  $\text{CDCl}_3$ )  $\delta$  7.79 (d,  $J = 7.8$  Hz, 0H), 7.47 - 7.32 (m, 1H), 7.25 (app t,  $J = 7.7$  Hz, 1H), 7.19 - 7.04 (m, 2H), 7.01 - 6.92 (m, 1H), 6.85 (d,  $J = 8.2$  Hz, 1H), 6.74 (app t,  $J = 7.5$  Hz, 0H), 5.93 (s, 1H), 4.24 (dd,  $J = 14.8, 7.3$  Hz, 1H), 3.77 (ddd,  $J = 14.9, 11.8, 6.3$  Hz, 1H), 3.26 (ddd,  $J = 18.7, 11.8, 7.5$  Hz, 1H), 2.72 (dd,  $J = 17.3, 6.1$  Hz, 1H), 1.71 (s, 9H).  $^{13}\text{C NMR}$  (126 MHz,  $\text{CDCl}_3$ )  $\delta$  163.90, 146.71, 138.08, 134.17, 132.78, 129.16, 129.12, 127.64, 126.31, 126.00, 120.86, 119.04, 112.95, 70.62, 58.19, 45.33, 29.47, 23.53. **HRMS** (ESI) found  $[\text{M}+\text{H}]^+$  307.1805,  $\text{C}_{20}\text{H}_{23}\text{N}_2\text{O}$  requires 307.1805. **HPLC** (Chiralpak IA column, 95:05 hexanes/isopropanol, 1 mL/min);  $t_r = 21.4$  min (minor), 22.8 min (major); 73 % ee.

**5-cyclohexyl-12,13-dihydro-4bH-isoquinolino[2,1-a]quinazolin-6(5H)-one (6m)**

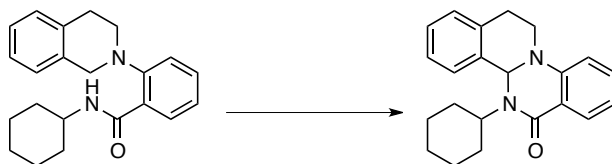

Subjection of **5m** (34 mg, 0.1 mmol) to General Procedure G gave the title compound (32 mg, 0.094 mmol, 94 % yield) as a white powder after purification by column chromatography on silica gel using Hex/EtOAc as eluent (9:1).  $^1\text{H NMR}$  (500 MHz,

CDCl<sub>3</sub>) δ 7.86 (d, *J* = 7.7 Hz, 1H), 7.36 (d, *J* = 7.2 Hz, 1H), 7.28 (app t, *J* = 8.3 Hz, 1H), 7.16 - 7.07 (m, 2H), 6.99 (d, *J* = 7.1 Hz, 1H), 6.87 (d, *J* = 8.3 Hz, 1H), 6.78 (app t, *J* = 7.5 Hz, 1H), 5.68 (s, 1H), 4.69 (br s, 1H), 4.24 (dd, *J* = 14.7, 7.3 Hz, 1H), 3.81 (ddd, *J* = 14.7, 11.5, 6.5 Hz, 1H), 3.28 (ddd, *J* = 18.3, 11.4, 7.5 Hz, 1H), 2.80 (dd, *J* = 17.3, 6.3 Hz, 1H), 2.24 - 2.13 (m, 1H), 2.12 - 1.97 (m, 1H), 1.96 - 1.81 (m, 2H), 1.80 - 1.66 (m, 2H), 1.62 - 1.41 (m, 3H), 1.21 - 1.07 (m, 1H). <sup>13</sup>C NMR (126 MHz, CDCl<sub>3</sub>) δ 163.33, 146.94, 134.27, 133.04, 129.40, 129.01, 127.77, 126.47, 125.81, 119.48, 119.05, 113.08, 99.77, 68.78, 54.50, 44.84, 32.42, 30.79, 25.92, 25.90, 25.53. HRMS (ESI) found [M+H]<sup>+</sup> 333.1963, C<sub>22</sub>H<sub>25</sub>N<sub>2</sub>O requires 333.1961. HPLC (Chiralpak IA column, 80:20 hexanes/isopropanol, 1 mL/min); t<sub>r</sub> = 12.2 min (minor), 15.6 min (major); 80 % ee.

**8-methyl-5-(*o*-tolyl)-12,13-dihydro-4*b*H-isoquinolino[2,1-*a*]quinazolin-6(5*H*)-one**  
(6n)

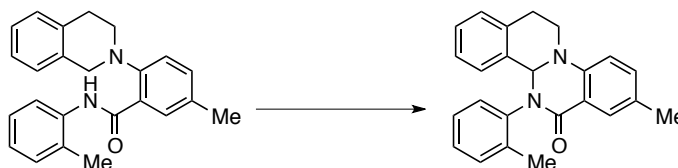

Subjection of **5n** (36 mg, 0.1 mmol) to General Procedure G gave the title compound (26 mg, 0.073 mmol, 73 % yield) as a white powder after purification by column chromatography on silica gel using Hex/EtOAc as eluent (4:1). <sup>1</sup>H NMR (300 MHz, CDCl<sub>3</sub>) δ 7.87 (s, 1H), 7.19 - 7.07 (m, 5H), 7.07 - 6.93 (m, 5H), 5.95 (s, 1H), 4.08 - 3.91 (m, 1H), 3.54 (ddd, *J* = 13.6, 8.2, 6.0 Hz, 1H), 3.28 - 3.11 (m, 1H), 3.07 - 2.88 (m, 1H), 2.40 (s, 3H), 2.31 (s, 3H). <sup>13</sup>C NMR (126 MHz, CDCl<sub>3</sub>) δ 164.54, 162.97, 146.54, 139.47, 136.54, 134.59, 134.40, 130.86, 130.63, 129.57, 128.80, 128.24, 128.14, 127.83, 127.34, 126.28, 125.74, 120.77, 116.73, 74.09, 45.14, 26.72, 20.60, 18.91. HRMS (ESI) found [M+H]<sup>+</sup> 355.1806, C<sub>24</sub>H<sub>23</sub>N<sub>2</sub>O requires 355.1805. HPLC (Chiralpak IA column, 80:20 hexanes/isopropanol, 1 mL/min); t<sub>r</sub> = 11.1 min (minor), 13.4 min (major); 90 % ee.

**8-bromo-5-(*o*-tolyl)-12,13-dihydro-4*b*H-isoquinolino[2,1-*a*]quinazolin-6(5*H*)-one**  
(6o)

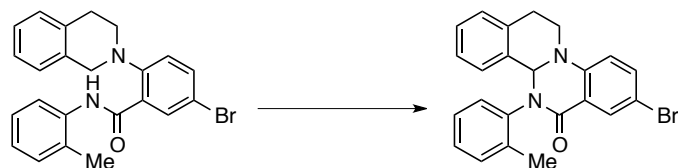

Subjection of **5o** (42 mg, 0.1 mmol) to General Procedure G gave the title compound (23 mg, 0.055 mmol, 55 % yield) as a white powder after purification by column

chromatography on silica gel using Hex/EtOAc as eluent (4:1).  $^1\text{H NMR}$  (300 MHz,  $\text{CDCl}_3$ )  $\delta$  8.14 (s, 1H), 7.48 (dd,  $J = 8.6, 2.5$  Hz, 1H), 7.23 - 6.96 (m, 8H), 6.90 (d,  $J = 8.7$  Hz, 1H), 5.93 (s, 1H), 4.04 (ddd,  $J = 13.4, 6.5, 4.1$  Hz, 1H), 3.59 (ddd,  $J = 13.5, 9.8, 5.7$  Hz, 1H), 3.22 (ddd,  $J = 16.0, 9.6, 6.2$  Hz, 1H), 3.05 - 2.83 (m, 1H), 2.38 (s, 3H).  $^{13}\text{C NMR}$  (126 MHz,  $\text{CDCl}_3$ )  $\delta$  164.52, 161.67, 147.41, 139.36, 136.20, 134.45, 133.52, 132.23, 131.08, 128.93, 128.40, 128.00, 127.61, 127.49, 126.43, 126.06, 121.68, 117.17, 112.80, 74.28, 45.03, 26.30, 18.88. **HRMS** (ESI) found  $[\text{M}+\text{H}]^+$  419.0755,  $\text{C}_{23}\text{H}_{20}\text{N}_2\text{O}_1\text{Br}_1$  requires 419.0754. **HPLC** (Chiralpak IA column, 80:20 hexanes/isopropanol, 0.75 mL/min);  $t_r = 20.5$  min (major), 21.8 min (minor); 93 % ee.

**5-(*o*-tolyl)-8-(trifluoromethyl)-12,13-dihydro-4*bH*-isoquinolino[2,1-*a*]quinazolin-6(5*H*)-one (6p)**

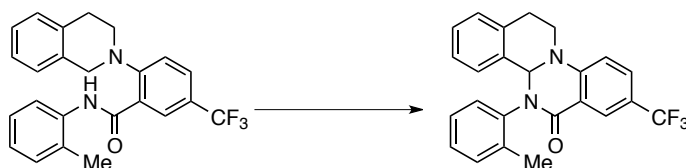

Subjection of **5p** (41 mg, 0.1 mmol) to General Procedure G gave the title compound (28 mg, 0.069 mmol, 69 % yield) as a white powder after purification by column chromatography on silica gel using Hex/EtOAc as eluent (4:1).  $^1\text{H NMR}$  (500 MHz,  $\text{CDCl}_3$ )  $\delta$  8.33 (s, 1H), 7.64 (d,  $J = 8.5$  Hz, 1H), 7.32 (dd,  $J = 12.4, 7.9$  Hz, 2H), 7.24 - 7.16 (m, 3H), 7.16 - 7.03 (m, 4H), 6.00 (s, 1H), 4.25 - 4.12 (m, 1H), 3.80 - 3.63 (m, 1H), 3.31 (ddd,  $J = 16.9, 11.1, 6.6$  Hz, 1H), 2.94 (ddd,  $J = 16.3, 4.8, 2.6$  Hz, 1H), 2.42 (s, 3H).  $^{13}\text{C NMR}$  (126 MHz,  $\text{CDCl}_3$ )  $\delta$  164.64, 161.87, 150.52, 139.48, 135.96, 134.49, 133.88, 131.18, 130.20, 130.17, 128.98, 128.52, 127.97, 127.74, 127.44 (q,  $J = 3.8$  Hz), 127.20, 126.50, 126.28, 118.86, 114.16, 74.37, 44.95, 26.25, 18.85. **HRMS** (ESI) found  $[\text{M}+\text{H}]^+$  409.1525,  $\text{C}_{24}\text{H}_{20}\text{N}_2\text{O}_1\text{F}_3$  requires 409.1522. **HPLC** (Chiralpak IC column, 80:20 hexanes/isopropanol, 1 mL/min);  $t_r = 21.1$  min (minor), 23.9 min (major); 90 % ee.

**(2*S*)-methyl 3-methyl-2-(6-oxo-12,13-dihydro-4*bH*-isoquinolino[2,1-*a*]quinazolin-5(6*H*)-yl)butanoate (6q)**

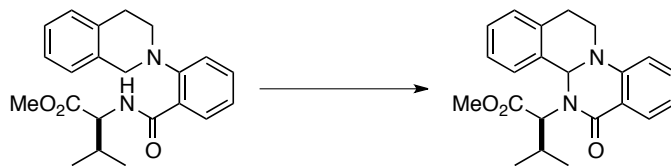

Subjection of **5q** (36 mg, 0.1 mmol) to General Procedure G gave the title compound (32 mg, 0.088 mmol, 88 % yield) as a 7:1 mixture of diastereomers in favor of diastereomer



1. The two diastereomers were separable by column chromatography on silica gel using Hex/EtOAc as eluent (10:1).

**(2*R*)-methyl 3-methyl-2-(6-oxo-12,13-dihydro-4*bH*-isoquinolino[2,1-*a*]quinazolin-5(6*H*)-yl)butanoate (6*r*)**

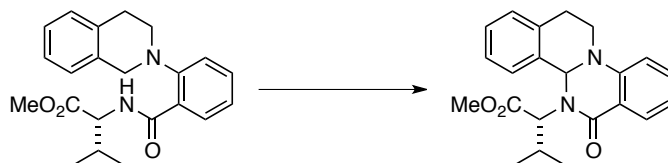

Subjection of **5*r*** (36 mg, 0.1 mmol) to General Procedure G gave the title compound (33 mg, 0.091 mmol, 91 % yield) as a 3:1 mixture of diastereomers in favor of diastereomer 2. The two diastereomers were separable by column chromatography on silica gel using Hex/EtOAc as eluent (10:1).

**Diastereomer # 1**

**<sup>1</sup>H NMR** (500 MHz, CDCl<sub>3</sub>) δ 7.88 (d, *J* = 7.7 Hz, 1H), 7.31 (app t, *J* = 7.7 Hz, 1H), 7.16 - 6.95 (m, 4H), 6.91 (d, *J* = 8.3 Hz, 1H), 6.80 (app t, *J* = 7.0 Hz, 1H), 6.02 (s, 1H), 5.34 (br s, 1H), 4.32 - 4.16 (m, 1H), 3.86-3.69 (m, 1H), 3.75 (s, 3H), 3.24 (ddd, *J* = 17.9, 11.2, 7.4 Hz, 1H), 2.89 - 2.74 (m, 1H), 2.50 - 2.25 (m, 1H), 1.11 - 0.88 (m, 6H). **<sup>13</sup>C NMR** (126 MHz, CDCl<sub>3</sub>) δ 171.48, 164.54, 147.41, 134.24, 133.56, 129.91, 129.18, 127.85, 125.70, 119.15, 118.47, 113.48, 69.11, 62.16, 52.00, 44.78, 30.11, 19.45, 19.09. **HRMS** (ESI) found [M+H]<sup>+</sup> 365.1861, C<sub>22</sub>H<sub>25</sub>N<sub>2</sub>O<sub>3</sub> requires 365.1860.

**Diastereomer # 2**

**<sup>1</sup>H NMR** (500 MHz, CDCl<sub>3</sub>) δ 7.85 (d, *J* = 8.0 Hz, 2H), 7.35 (app t, *J* = 7.8 Hz, 1H), 7.25 - 7.15 (m, 2H), 7.15 - 7.00 (m, 1H), 6.95 (d, *J* = 8.1 Hz, 1H), 6.90 - 6.74 (m, 1H), 5.81 (s, 1H), 4.33 - 4.08 (m, 1H), 4.06 - 3.76 (m, 4H), 3.72 - 3.58 (m, 1H), 3.32 (ddd, *J* = 17.5, 11.2, 6.9 Hz, 1H), 2.81 (dd, *J* = 18.8, 5.7 Hz, 1H), 2.70 - 2.54 (m, 1H), 1.18 (d, *J* = 6.7 Hz, 3H), 1.13 (d, *J* = 6.7 Hz, 3H). **<sup>13</sup>C NMR** (126 MHz, CDCl<sub>3</sub>) δ 170.60, 164.59, 163.37, 147.58, 134.67, 133.45, 129.40, 129.23, 126.26, 119.58, 73.74, 66.41, 52.12, 45.22, 29.73, 29.25, 20.67, 19.93. **HRMS** (ESI) found [M+H]<sup>+</sup> 365.1862, C<sub>22</sub>H<sub>25</sub>N<sub>2</sub>O<sub>3</sub> requires 365.1860.

## References:

1. Hoffman, S.; Seayad, M.; List, B. *Angew. Chem. Int. Ed.* **2005**, *44*, 7424.
2. Rauniyar, V.; Lackner, A.; Hamilton, G.; Toste, F. D. *Science* **2011**, *334*, 1681.
3. Wang, Y-M.; Wu, J.; Hoong, C.; Rauniyar, V.; Toste, F. D. *J. Am. Chem. Soc.* **2012**, *134*, 12928.
4. Čorić, I.; Müller, S.; List, B. *J. Am. Chem. Soc.* **2010**, *132*, 17370.
5. Li, G.; Liang, Y.; Antilla, J. *J. Am. Chem. Soc.* **2007**, *129*, 5830.
6. Li, L.; Zhu, A.; Yao, H.; Wei, Y.; Yang, D.; Li, J.; Zhang, G. *J. Chem. Res.* **2010**, *34*, 511.
7. Prakash, G.; Stephenson, M.; Shih, J.; Olah, G. *Org. Lett.* **1986**, *51*, 3215.
8. Tao, C-Z.; Cui, X.; Li, J.; Liu, A-X.; Liu, L.; Guo, Q-X. *Tetrahedron Lett.* **2007**, *48*, 3525.
9. Li, Q.; Tor, Y. *Org. Lett.* **2003**, *5*, 2571.
10. Danjo, H.; Hirata, K.; Miyazawa, T.; Noda, M.; Uchiyama, S.; Fukui, K.; Kawahata, M.; Azumaya, I.; Yamaguchi, K. *J. Am. Chem. Soc.* **2010**, *132*, 15556.
11. Craig, G.; Eberle, M.; Irminger, B.; Schückenböhmer, A.; Laime, Y.; Müller, P. *Heterocycles* **2007**, *71*, 1967.
12. Cabildo, P.; Claramunt, R.; Forfar, I.; Elguero, J. *Tetrahedron Lett.* **1994**, *35*, 183.
13. Asano, K.; Matsubara, S. *Org. Lett.* **2010**, *12*, 4988.
14. Yoshida, H.; Morishita, t.; Oshita, J. *Org. Lett.* **2008**, *10*, 3845.

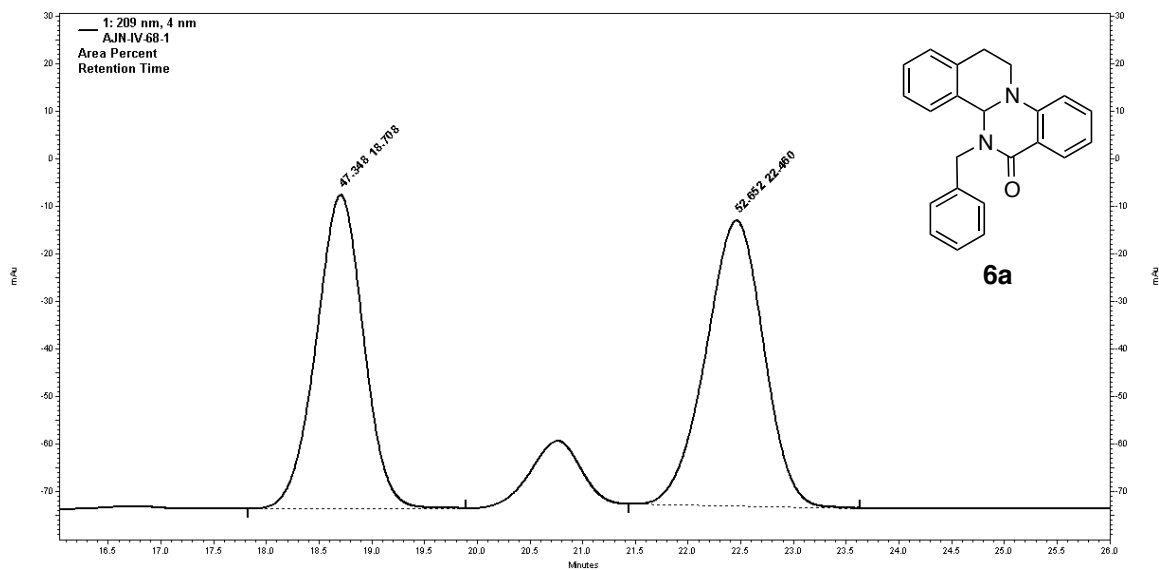

| Peak #1 | Retention Time (min) | Area Percent |
|---------|----------------------|--------------|
| 1       | 18.8                 | 47.34        |
| 2       | 22.5                 | 52.65        |

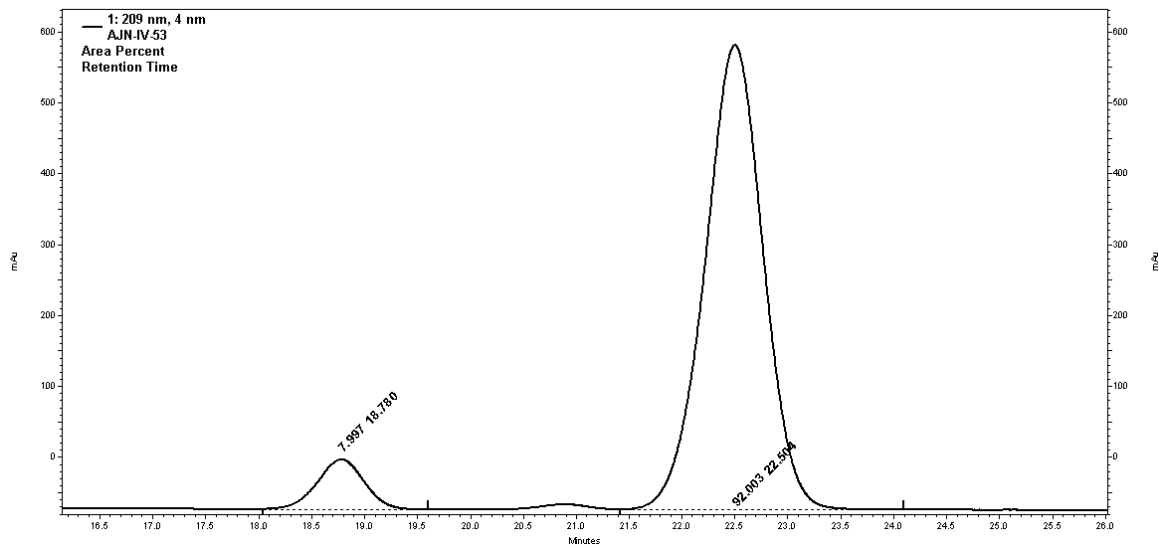

| Peak #1 | Retention Time (min) | Area Percent |
|---------|----------------------|--------------|
| 1       | 18.7                 | 8.00         |
| 2       | 22.5                 | 92.00        |

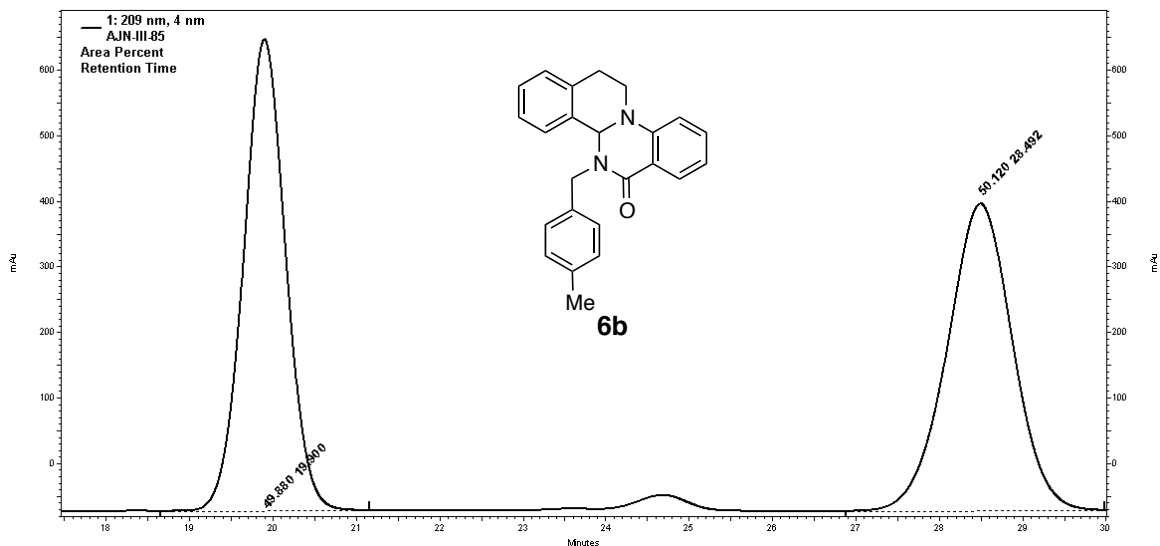

| Peak #1 | Retention Time (min) | Area Percent |
|---------|----------------------|--------------|
| 1       | 19.9                 | 49.88        |
| 2       | 28.5                 | 50.12        |

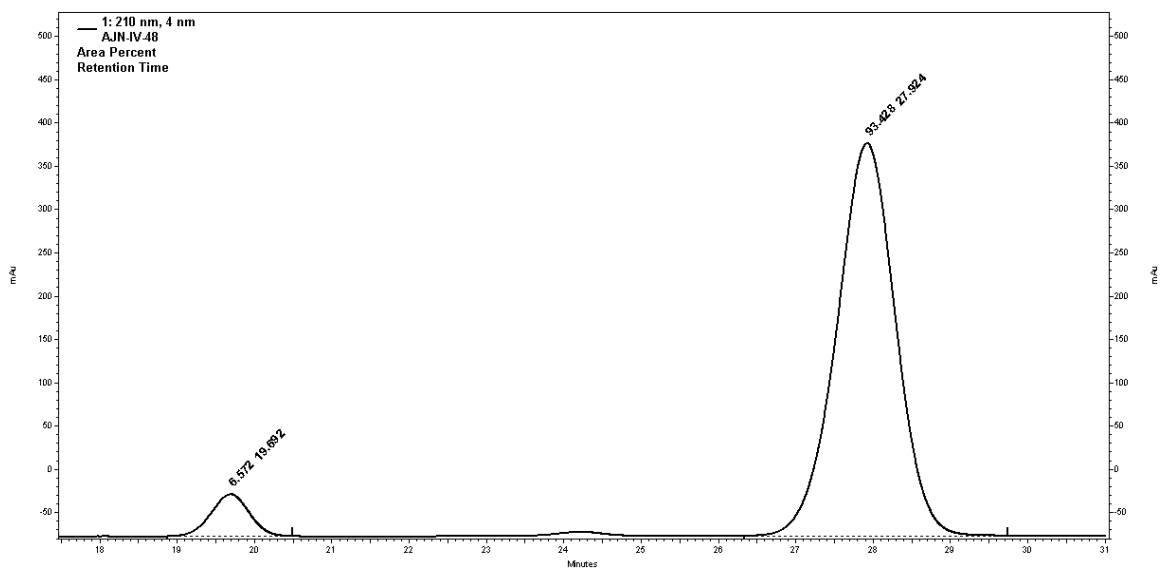

| Peak #1 | Retention Time (min) | Area Percent |
|---------|----------------------|--------------|
| 1       | 19.7                 | 6.57         |
| 2       | 27.9                 | 93.43        |

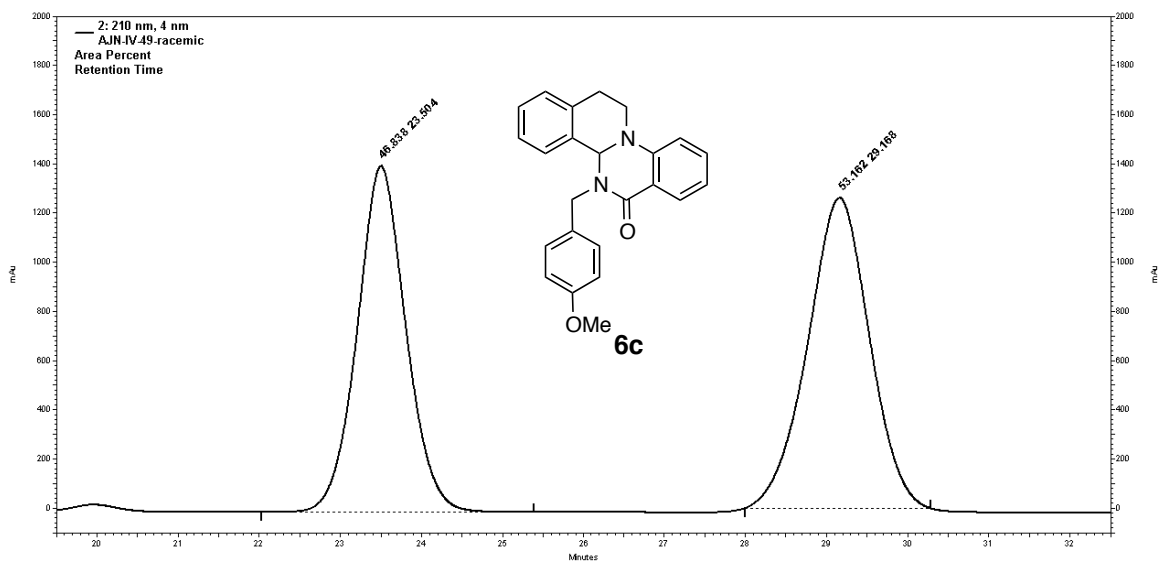

| Peak #1 | Retention Time (min) | Area Percent |
|---------|----------------------|--------------|
| 1       | 23.5                 | 46.83        |
| 2       | 29.2                 | 53.17        |

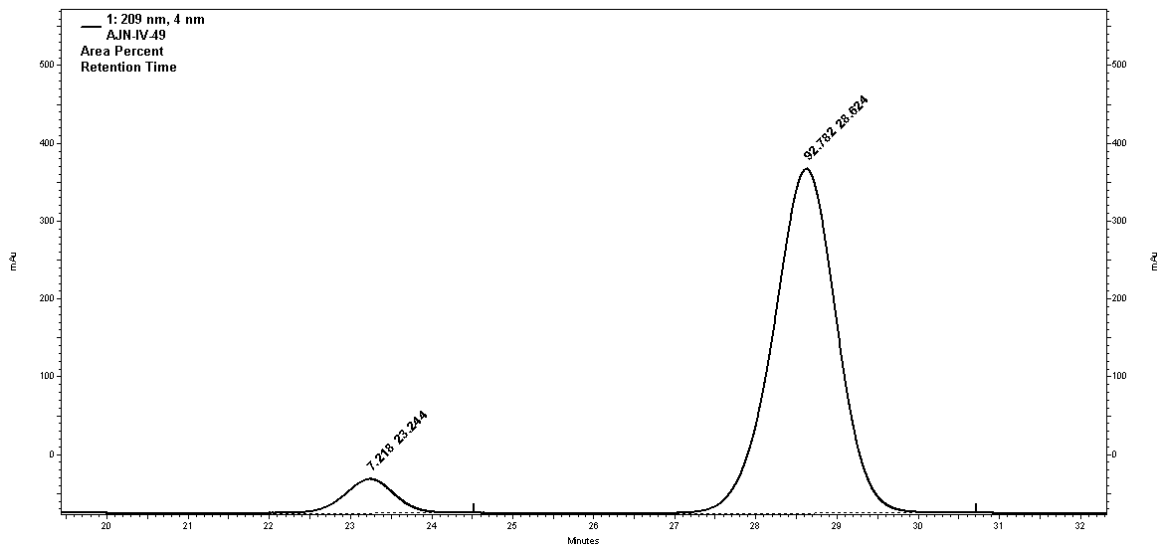

| Peak #1 | Retention Time (min) | Area Percent |
|---------|----------------------|--------------|
| 1       | 23.2                 | 7.22         |
| 2       | 28.6                 | 92.78        |

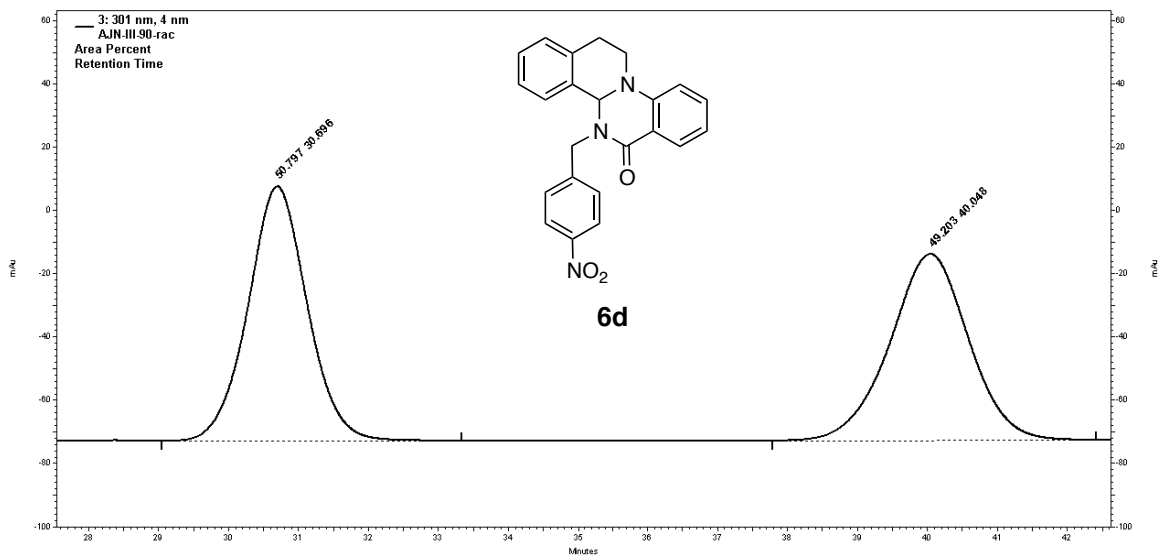

| Peak #1 | Retention Time (min) | Area Percent |
|---------|----------------------|--------------|
| 1       | 30.7                 | 50.80        |
| 2       | 40.0                 | 49.20        |

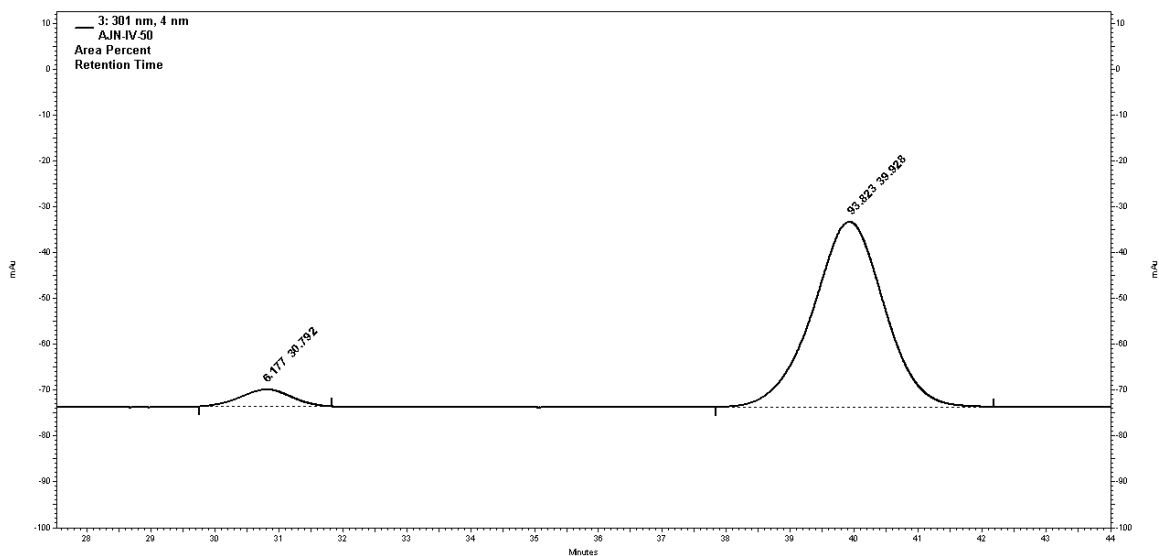

| Peak #1 | Retention Time (min) | Area Percent |
|---------|----------------------|--------------|
| 1       | 30.8                 | 6.18         |
| 2       | 39.9                 | 93.82        |

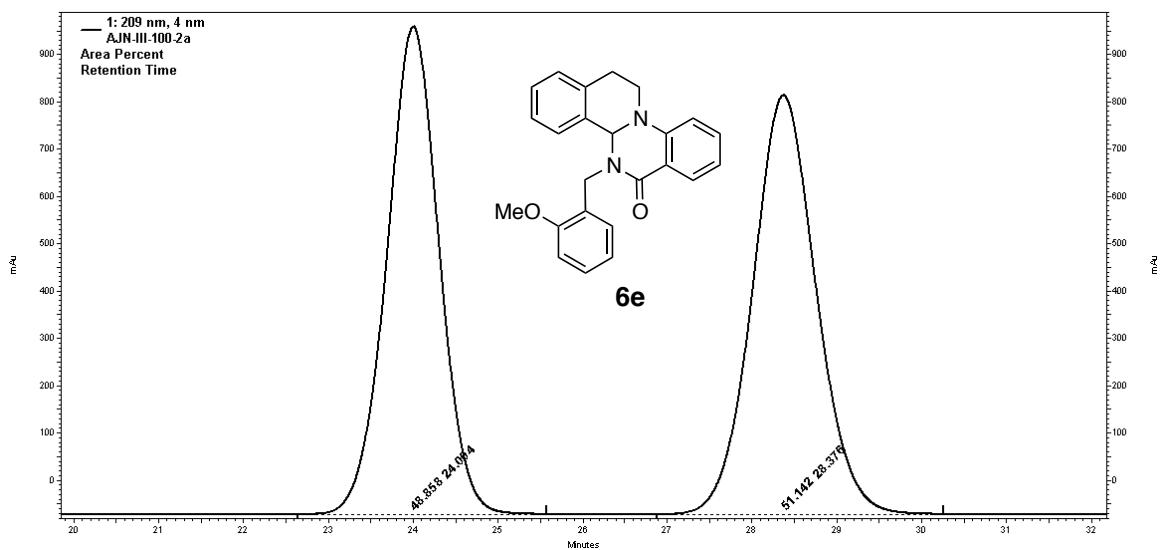

| Peak #1 | Retention Time (min) | Area Percent |
|---------|----------------------|--------------|
| 1       | 24.1                 | 48.86        |
| 2       | 28.4                 | 51.14        |

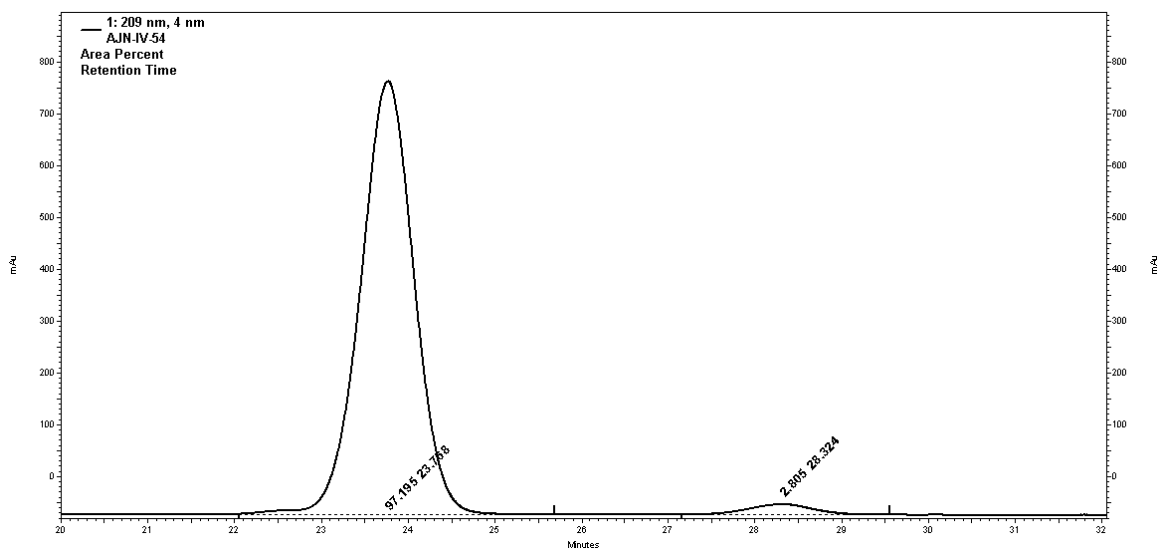

| Peak #1 | Retention Time (min) | Area Percent |
|---------|----------------------|--------------|
| 1       | 23.8                 | 97.20        |
| 2       | 28.3                 | 2.80         |

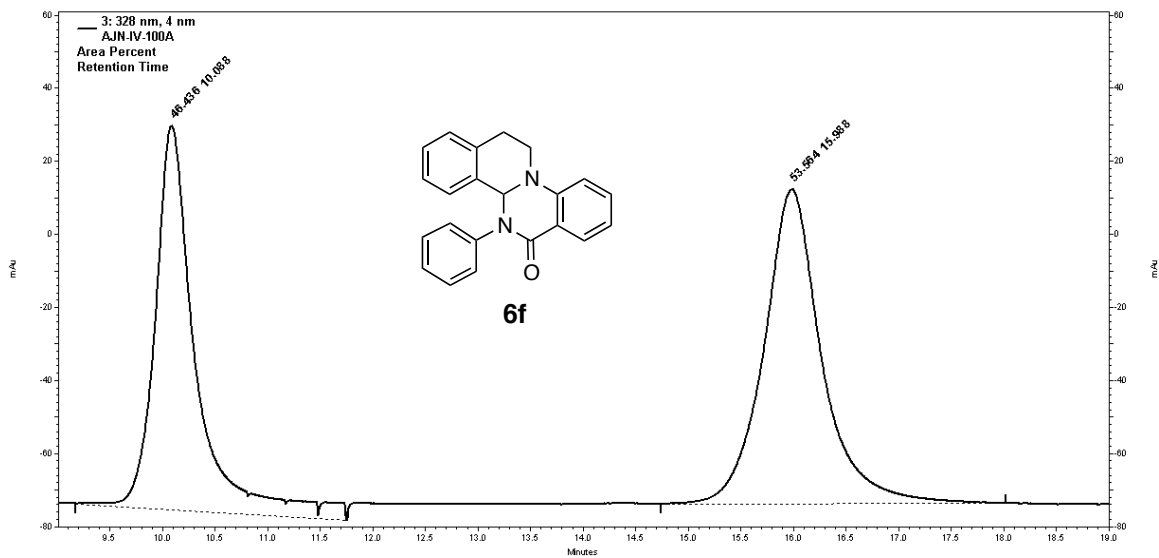

| Peak #1 | Retention Time (min) | Area Percent |
|---------|----------------------|--------------|
| 1       | 10.1                 | 46.43        |
| 2       | 16.0                 | 53.56        |

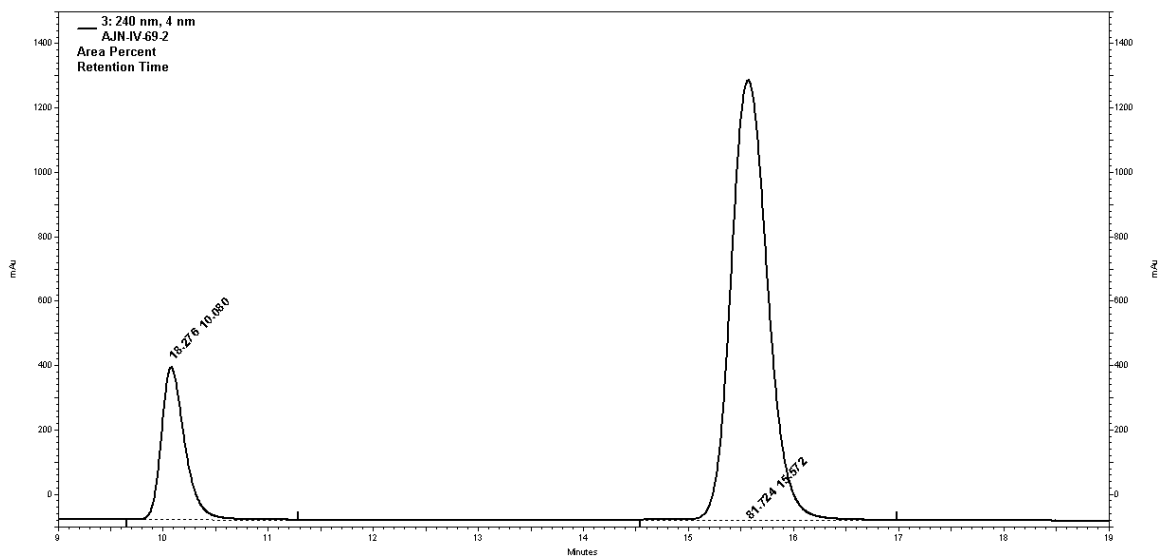

| Peak #1 | Retention Time (min) | Area Percent |
|---------|----------------------|--------------|
| 1       | 10.1                 | 18.28        |
| 2       | 15.6                 | 81.72        |



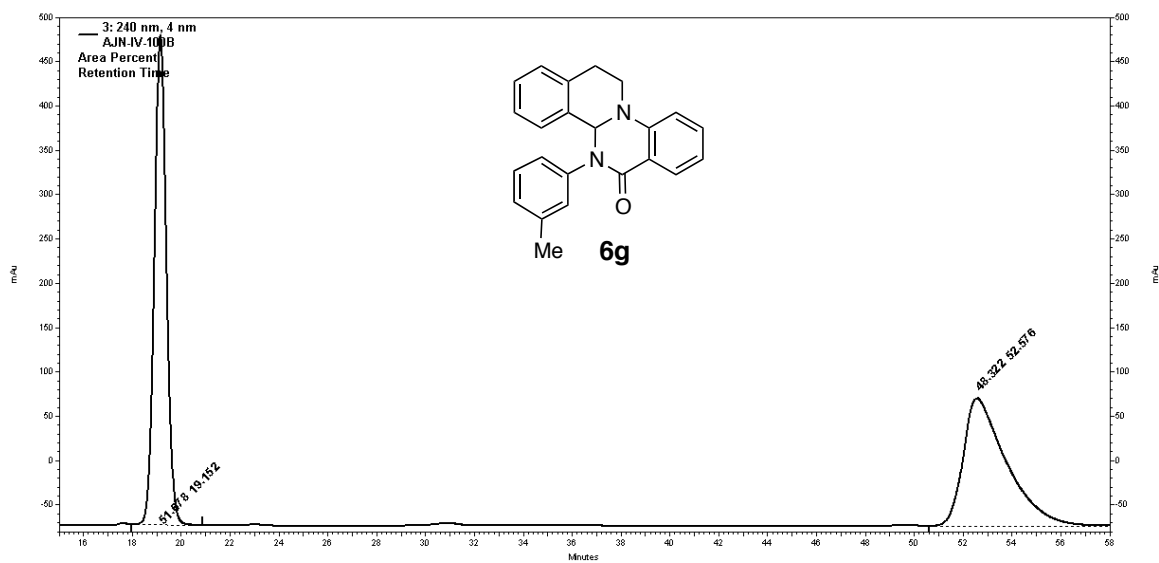

| Peak #1 | Retention Time (min) | Area Percent |
|---------|----------------------|--------------|
| 1       | 19.2                 | 51.68        |
| 2       | 52.6                 | 48.32        |

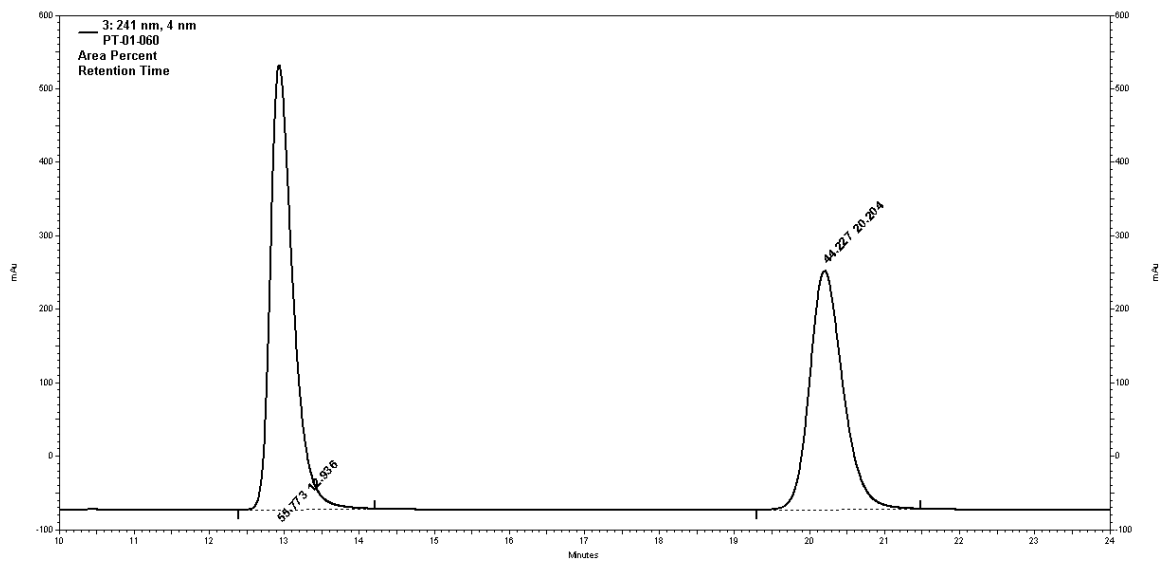

| Peak #1 | Retention Time (min) | Area Percent |
|---------|----------------------|--------------|
| 1       | 17.4                 | 79.76        |
| 2       | 48.0                 | 20.24        |

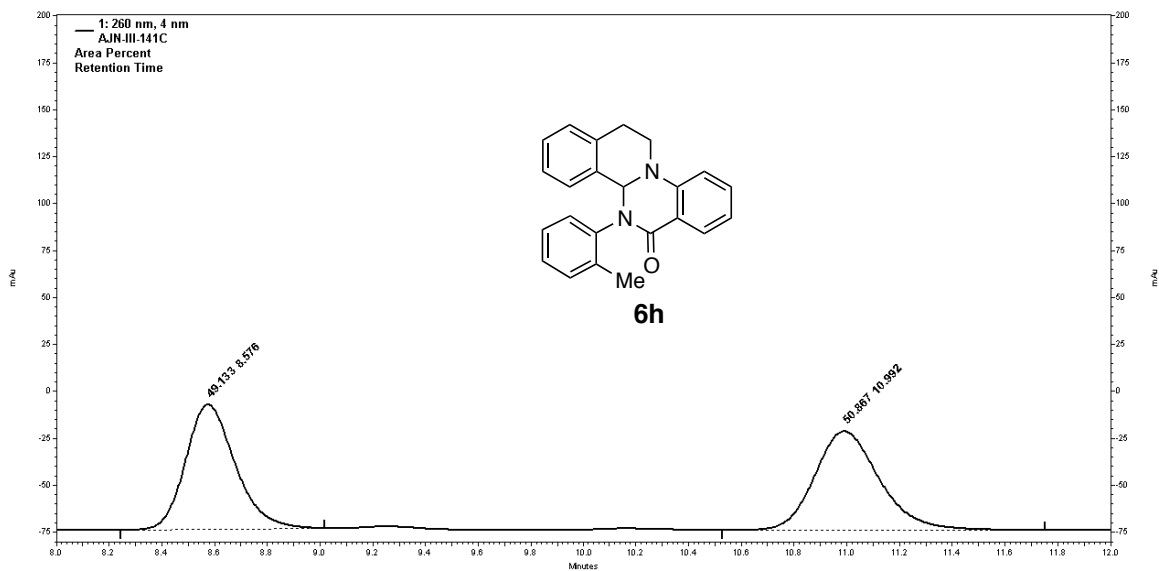

| Peak #1 | Retention Time (min) | Area Percent |
|---------|----------------------|--------------|
| 1       | 8.6                  | 49.13        |
| 2       | 11.0                 | 50.87        |

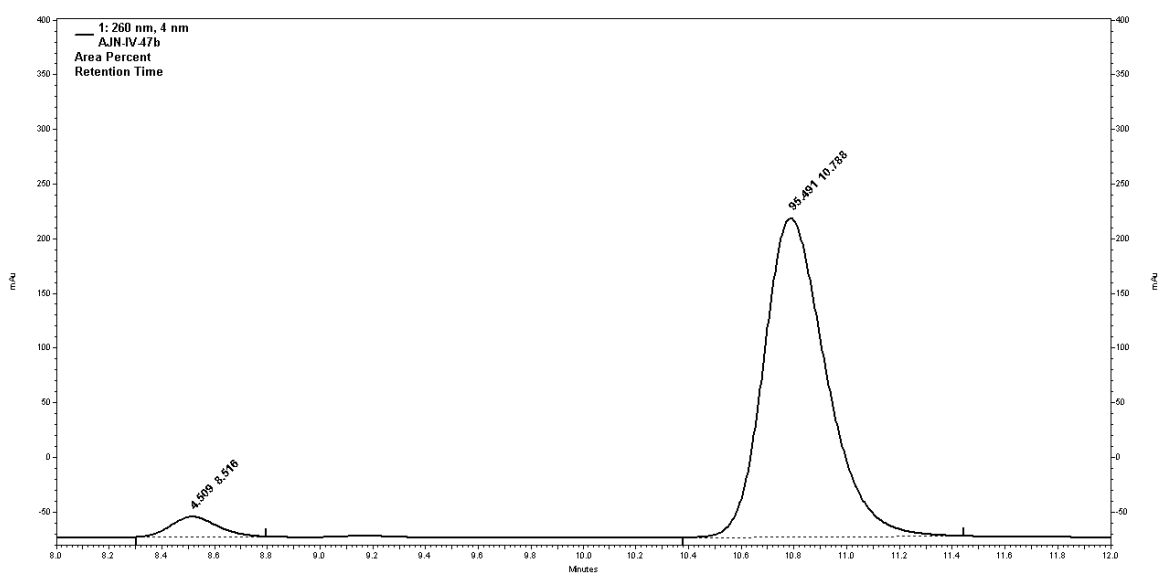

| Peak #1 | Retention Time (min) | Area Percent |
|---------|----------------------|--------------|
| 1       | 8.5                  | 4.51         |
| 2       | 10.8                 | 95.49        |

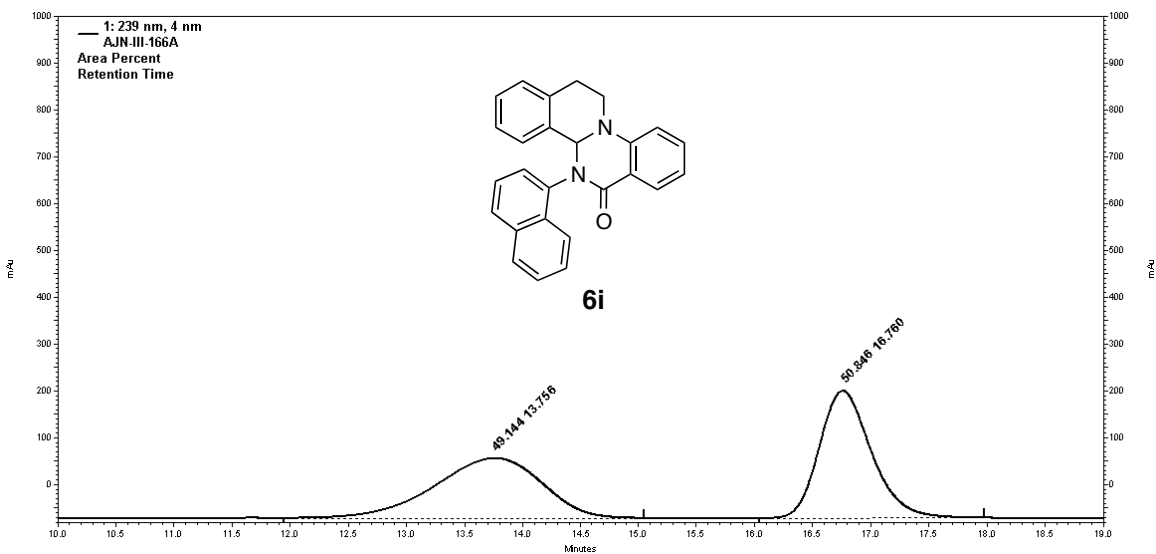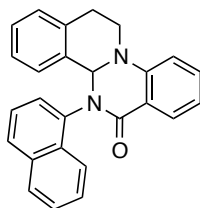

6i

| Peak #1 | Retention Time (min) | Area Percent |
|---------|----------------------|--------------|
| 1       | 13.8                 | 49.14        |
| 2       | 16.8                 | 50.85        |

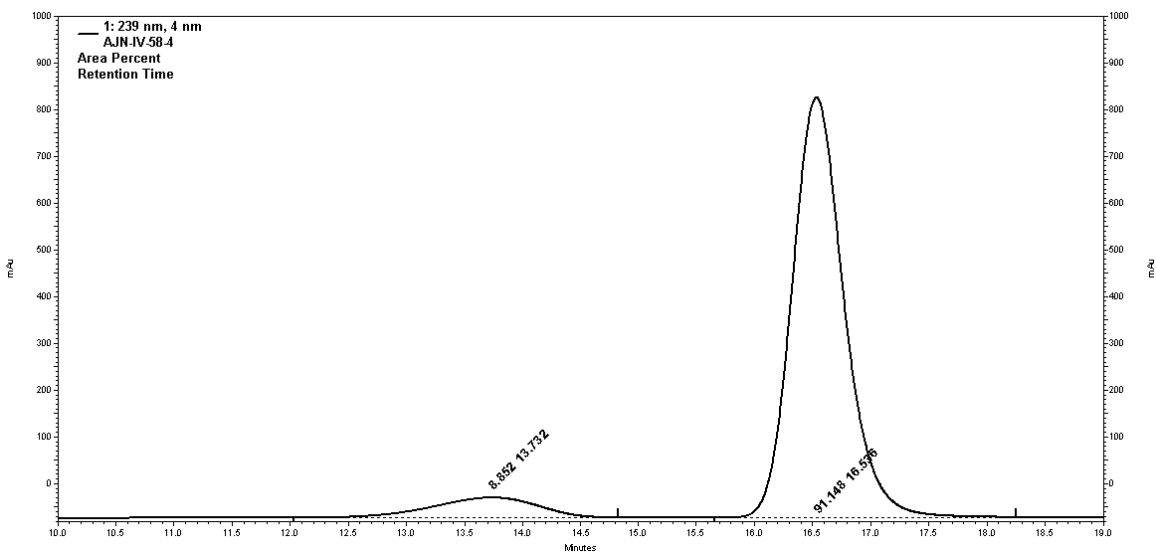

| Peak #1 | Retention Time (min) | Area Percent |
|---------|----------------------|--------------|
| 1       | 13.7                 | 8.85         |
| 2       | 16.5                 | 91.15        |

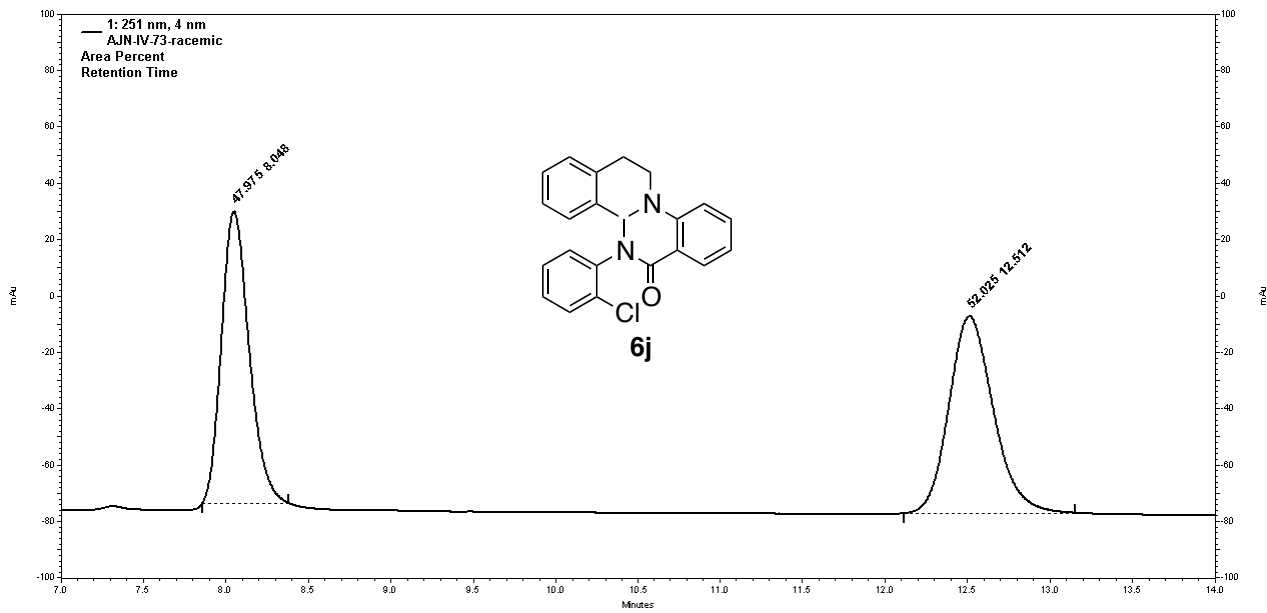

| Peak #1 | Retention Time (min) | Area Percent |
|---------|----------------------|--------------|
| 1       | 8.0                  | 48.98        |
| 2       | 12.5                 | 52.03        |

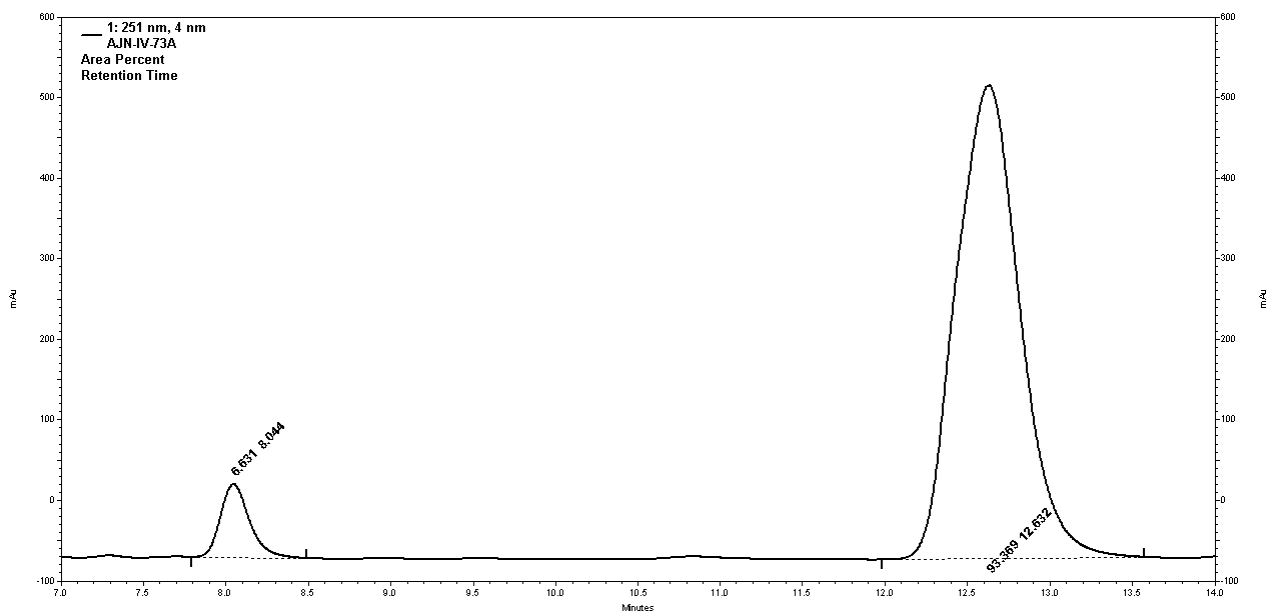

| Peak #1 | Retention Time (min) | Area Percent |
|---------|----------------------|--------------|
| 1       | 8.0                  | 6.63         |
| 2       | 12.6                 | 93.37        |

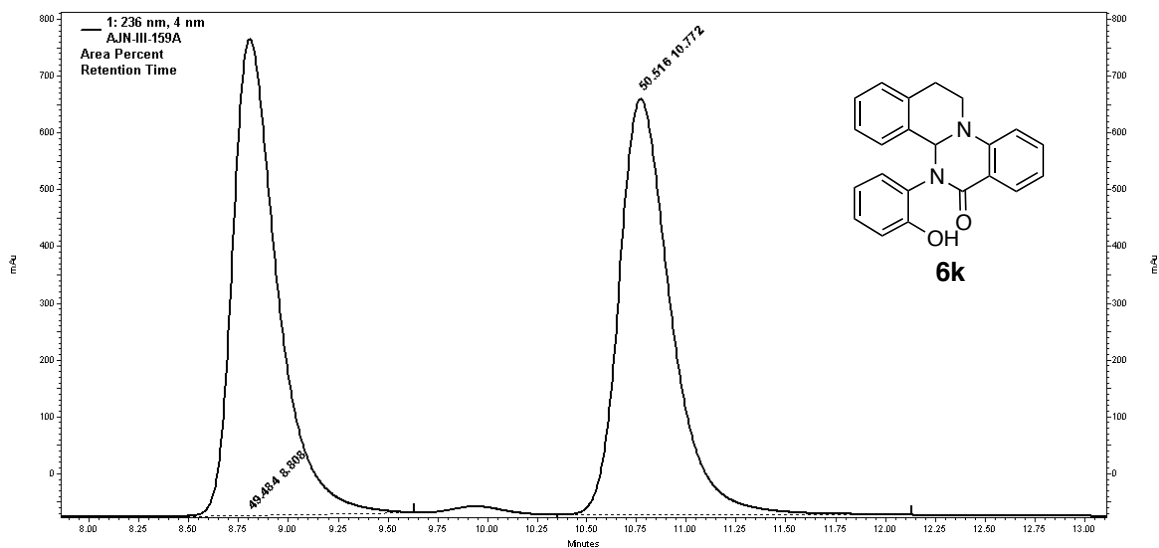

| Peak #1 | Retention Time (min) | Area Percent |
|---------|----------------------|--------------|
| 1       | 8.8                  | 49.48        |
| 2       | 10.8                 | 50.52        |

15

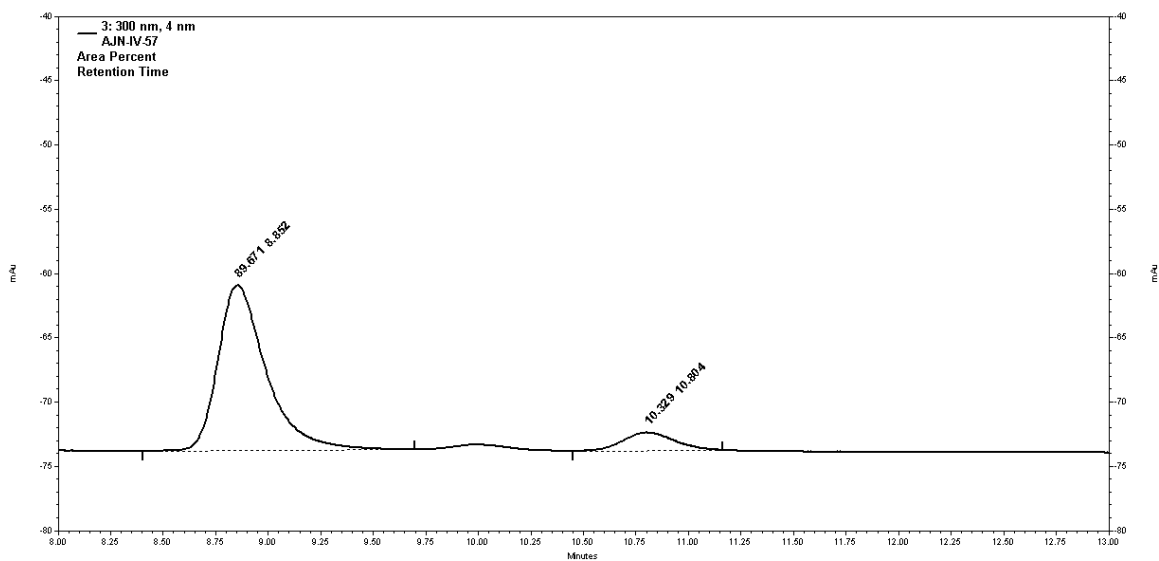

| Peak #1 | Retention Time (min) | Area Percent |
|---------|----------------------|--------------|
| 1       | 8.9                  | 89.67        |
| 2       | 10.8                 | 10.33        |

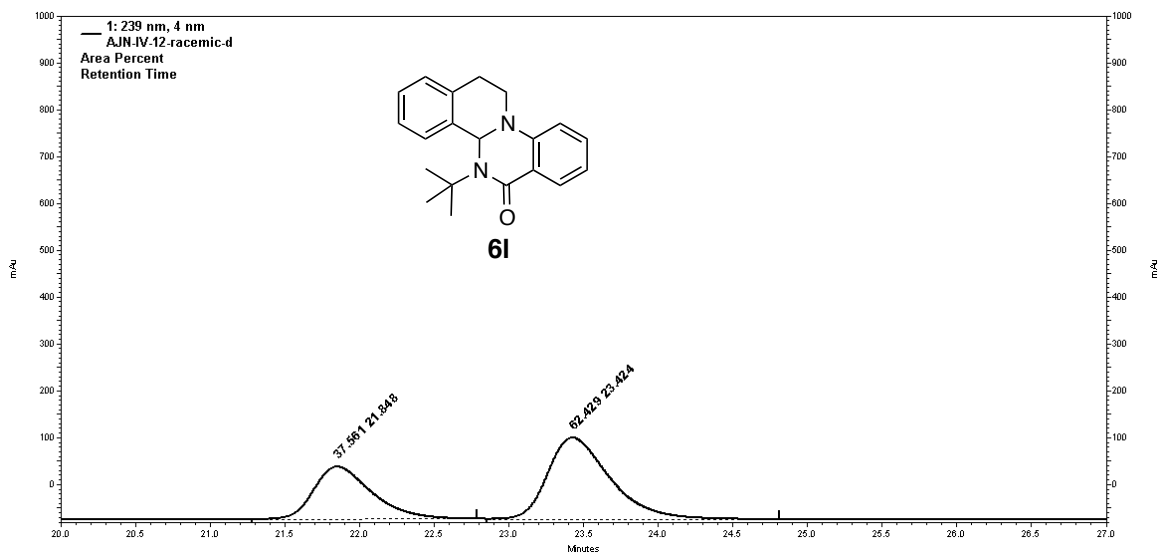

| Peak #1 | Retention Time (min) | Area Percent |
|---------|----------------------|--------------|
| 1       | 21.8                 | 37.56        |
| 2       | 23.4                 | 62.43        |

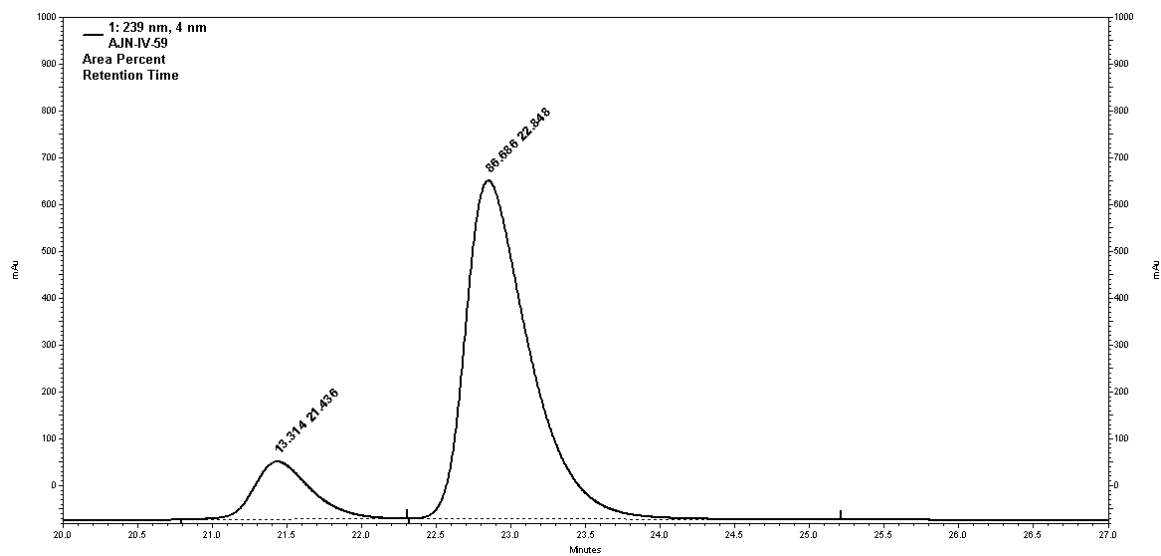

| Peak #1 | Retention Time (min) | Area Percent |
|---------|----------------------|--------------|
| 1       | 21.4                 | 13.31        |
| 2       | 22.8                 | 86.61        |

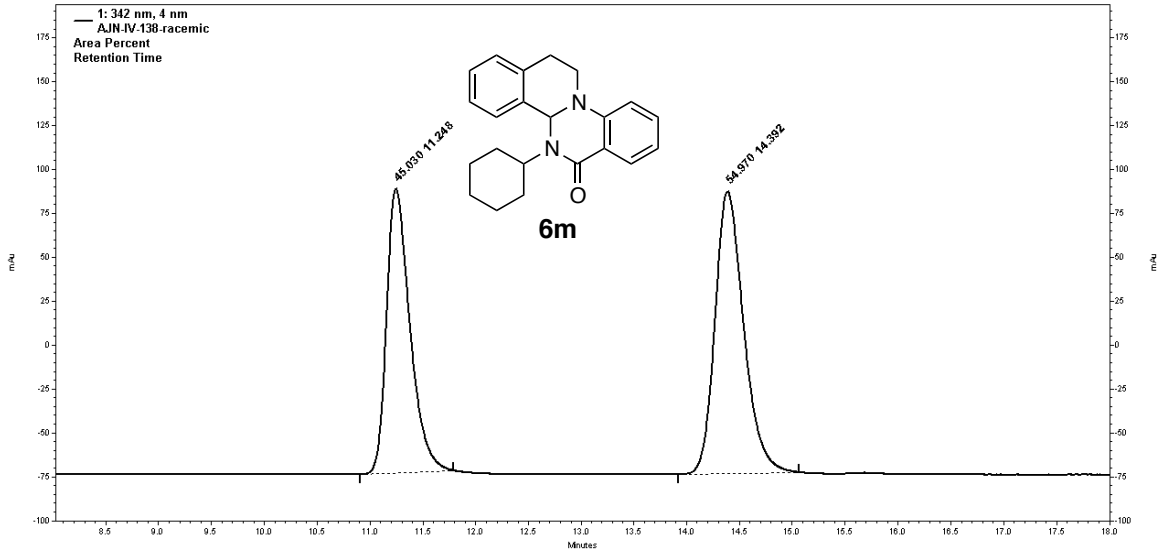

| Peak #1 | Retention Time (min) | Area Percent |
|---------|----------------------|--------------|
| 1       | 11.2                 | 45.03        |
| 2       | 14.4                 | 54.97        |

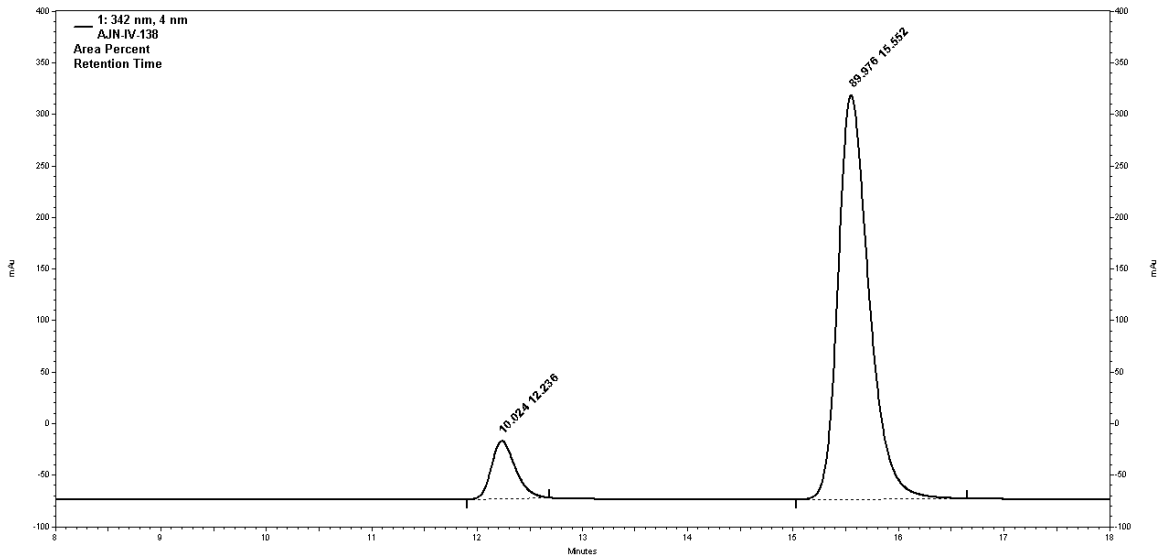

| Peak #1 | Retention Time (min) | Area Percent |
|---------|----------------------|--------------|
| 1       | 12.2                 | 10.02        |
| 2       | 15.6                 | 89.98        |

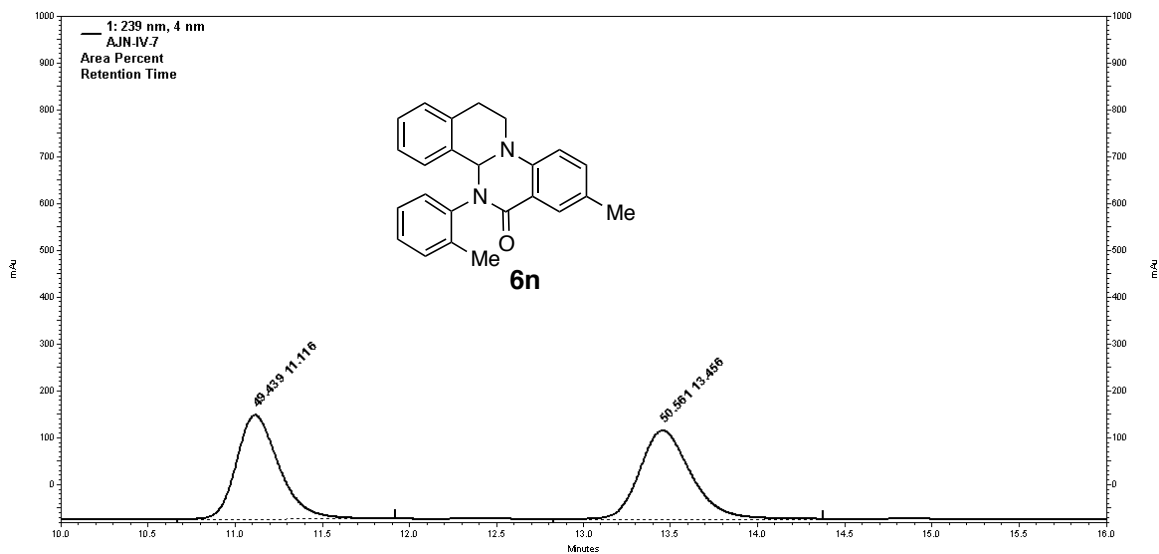

| Peak #1 | Retention Time (min) | Area Percent |
|---------|----------------------|--------------|
| 1       | 11.1                 | 49.44        |
| 2       | 13.5                 | 50.56        |

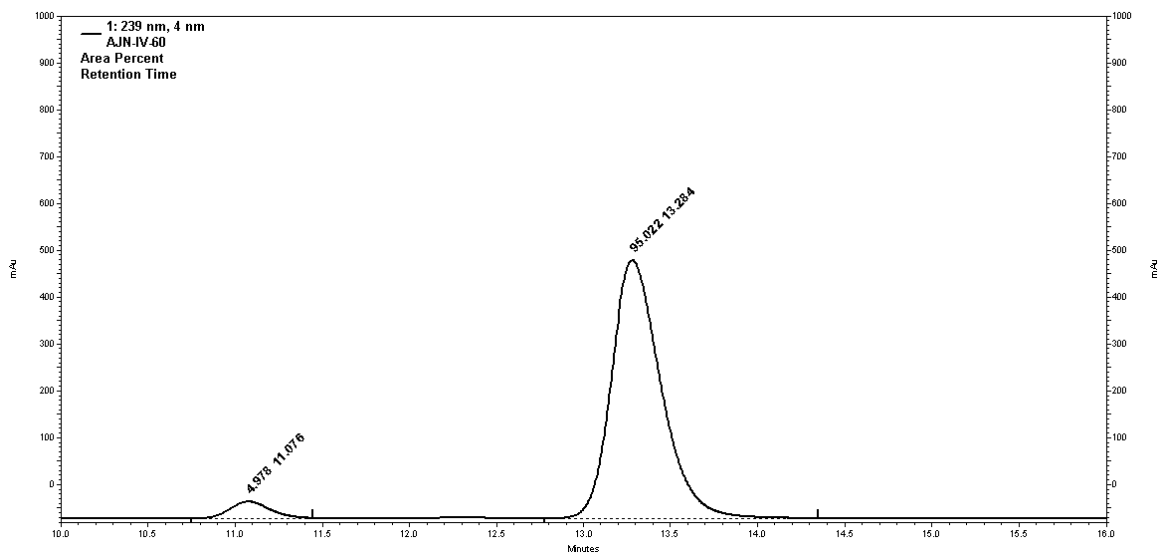

| Peak #1 | Retention Time (min) | Area Percent |
|---------|----------------------|--------------|
| 1       | 11.1                 | 4.98         |
| 2       | 13.3                 | 95.02        |



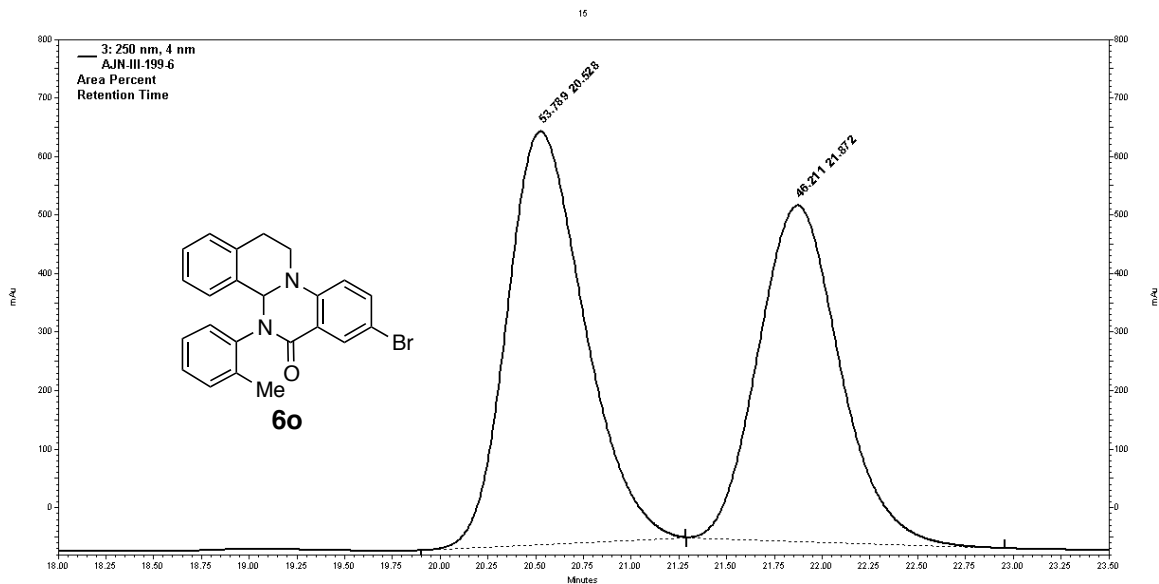

| Peak #1 | Retention Time (min) | Area Percent |
|---------|----------------------|--------------|
| 1       | 20.5                 | 53.79        |
| 2       | 21.9                 | 46.21        |

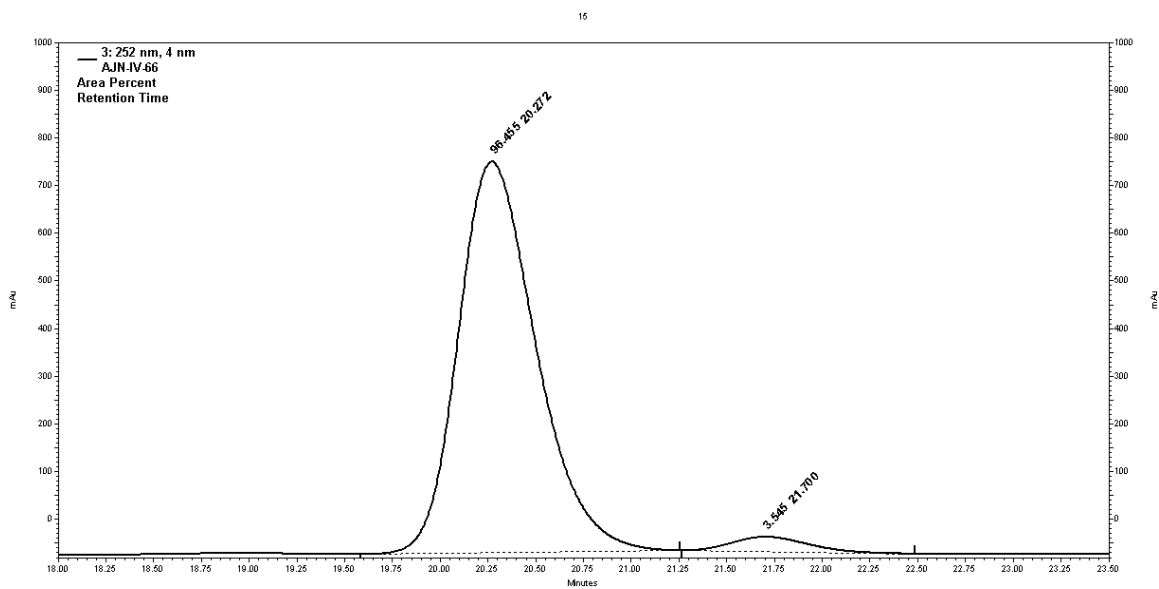

| Peak #1 | Retention Time (min) | Area Percent |
|---------|----------------------|--------------|
| 1       | 20.3                 | 96.46        |
| 2       | 21.7                 | 3.54         |

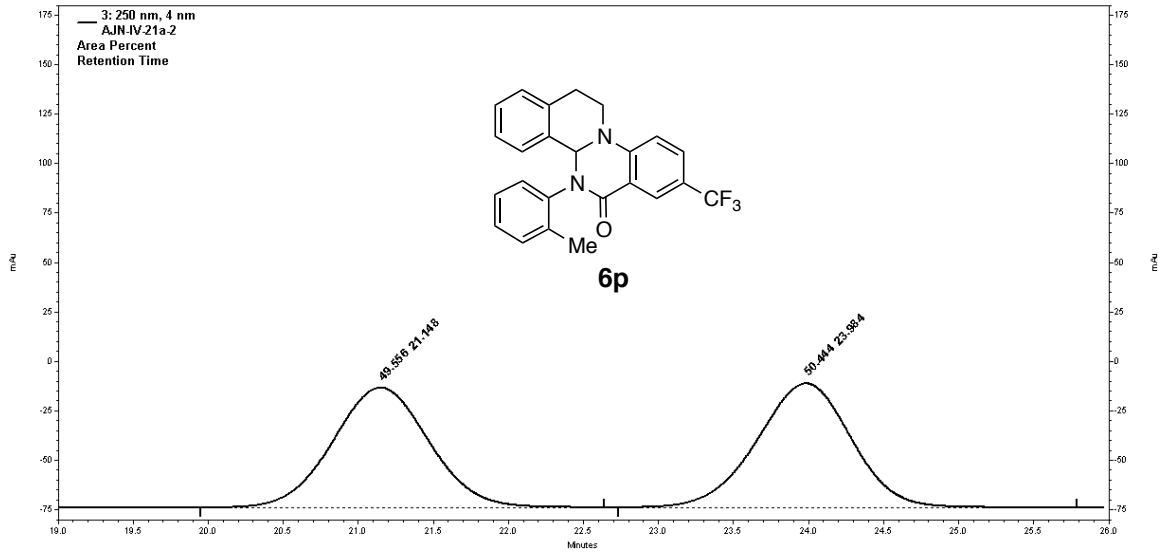

| Peak #1 | Retention Time (min) | Area Percent |
|---------|----------------------|--------------|
| 1       | 21.1                 | 49.56        |
| 2       | 24.0                 | 50.44        |

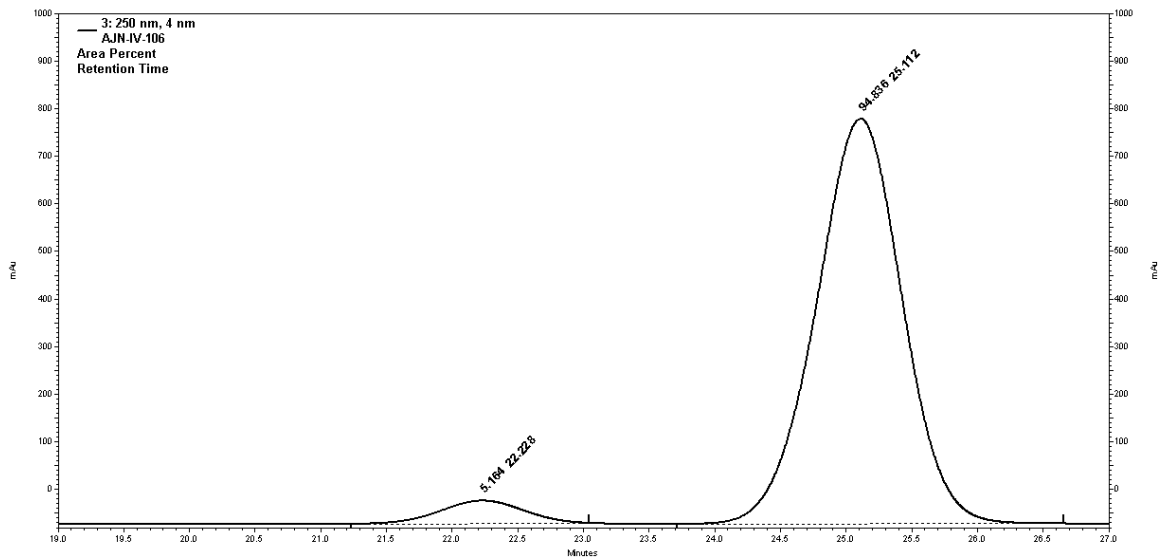

| Peak #1 | Retention Time (min) | Area Percent |
|---------|----------------------|--------------|
| 1       | 22.2                 | 5.16         |
| 2       | 25.1                 | 94.84        |

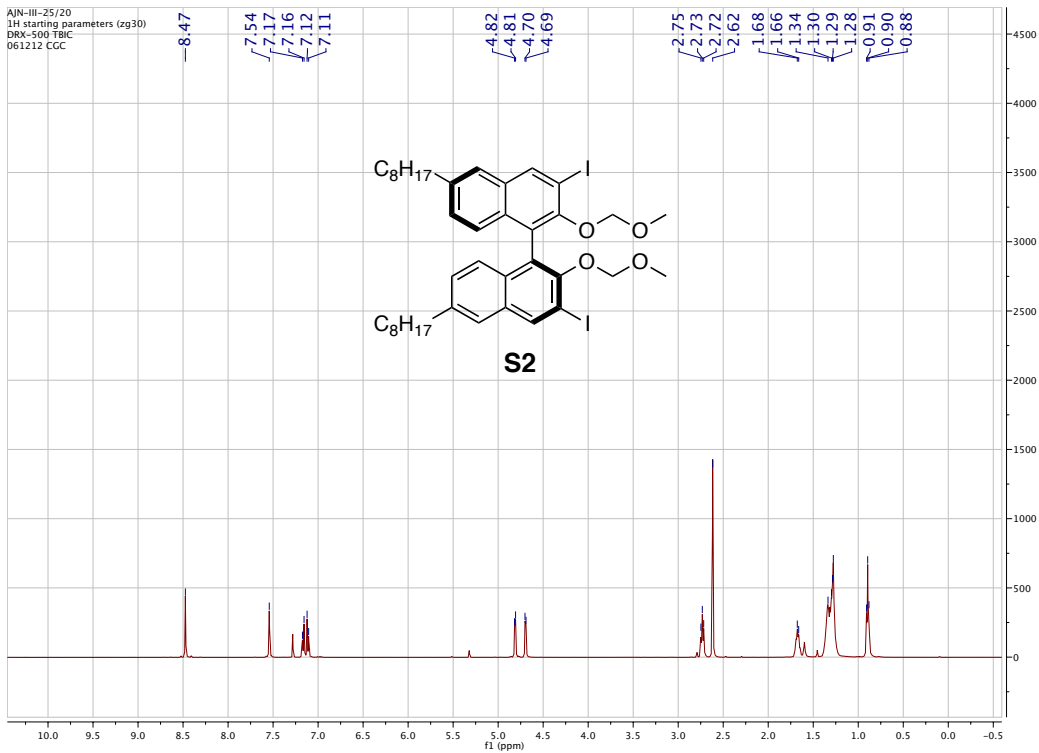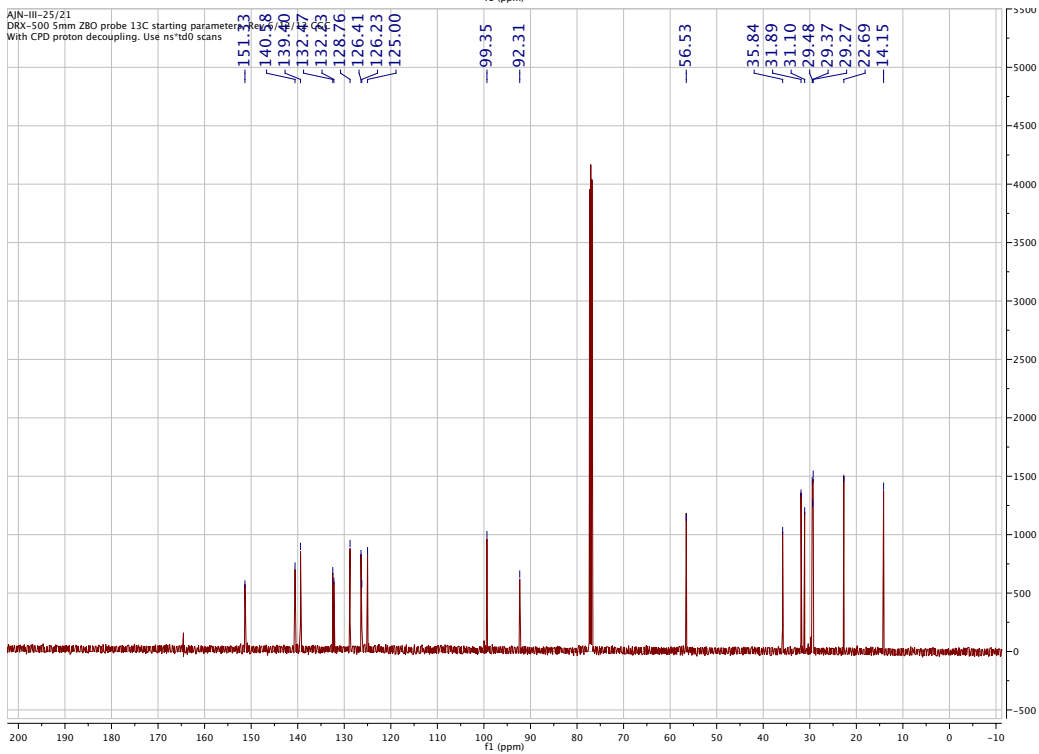

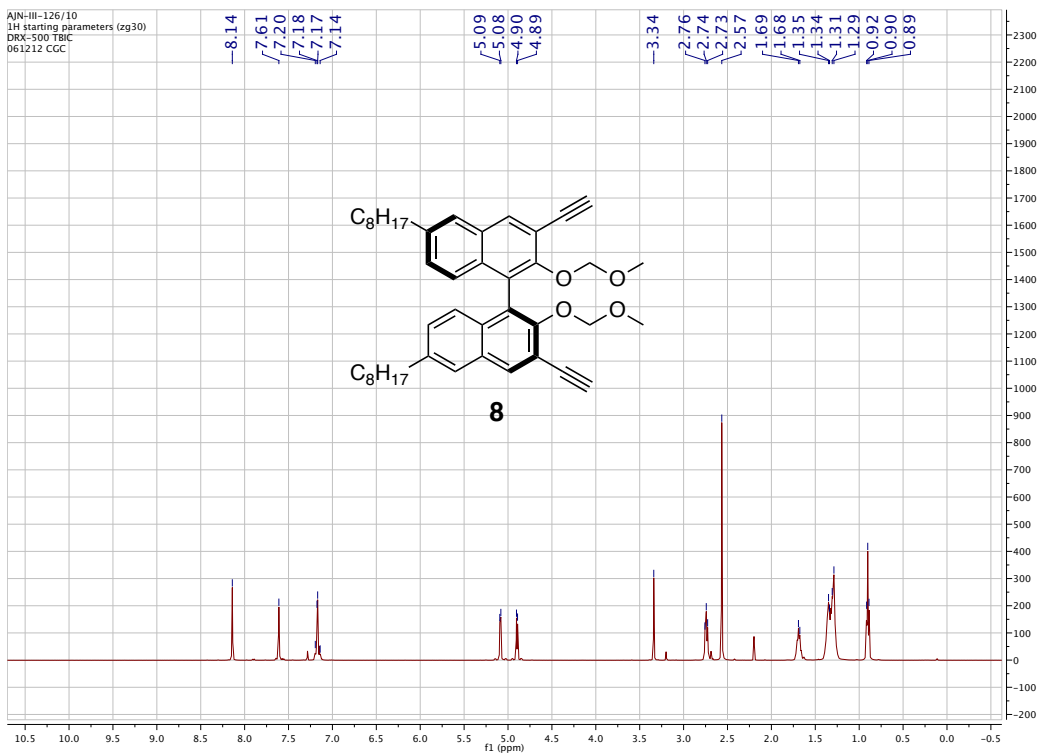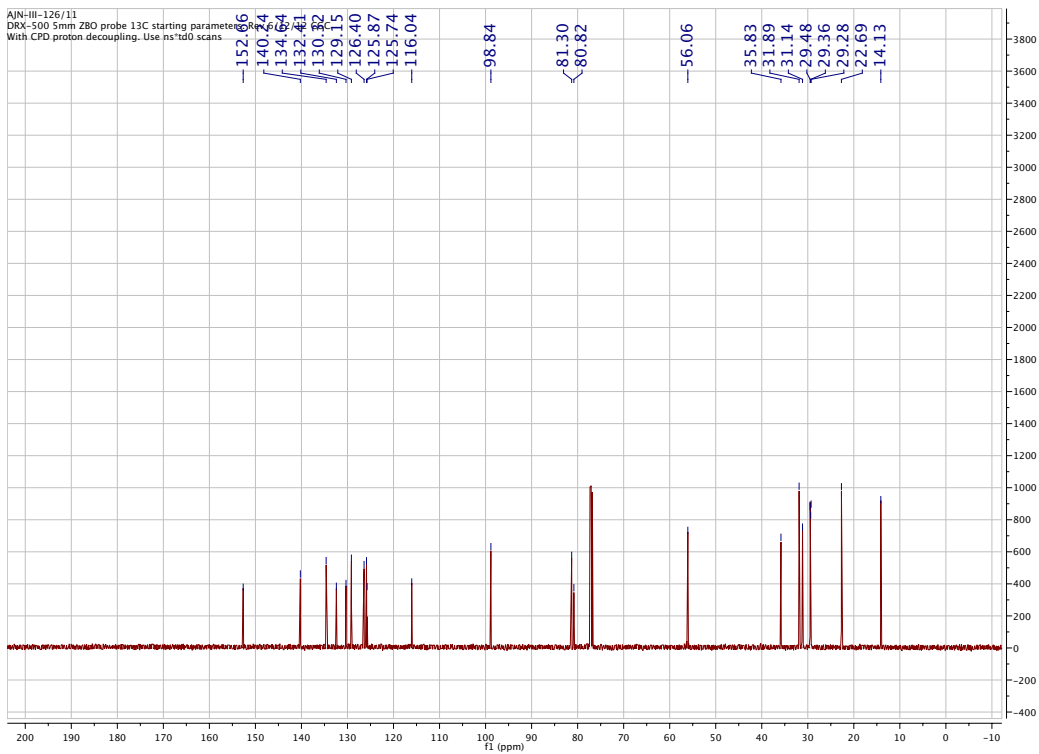

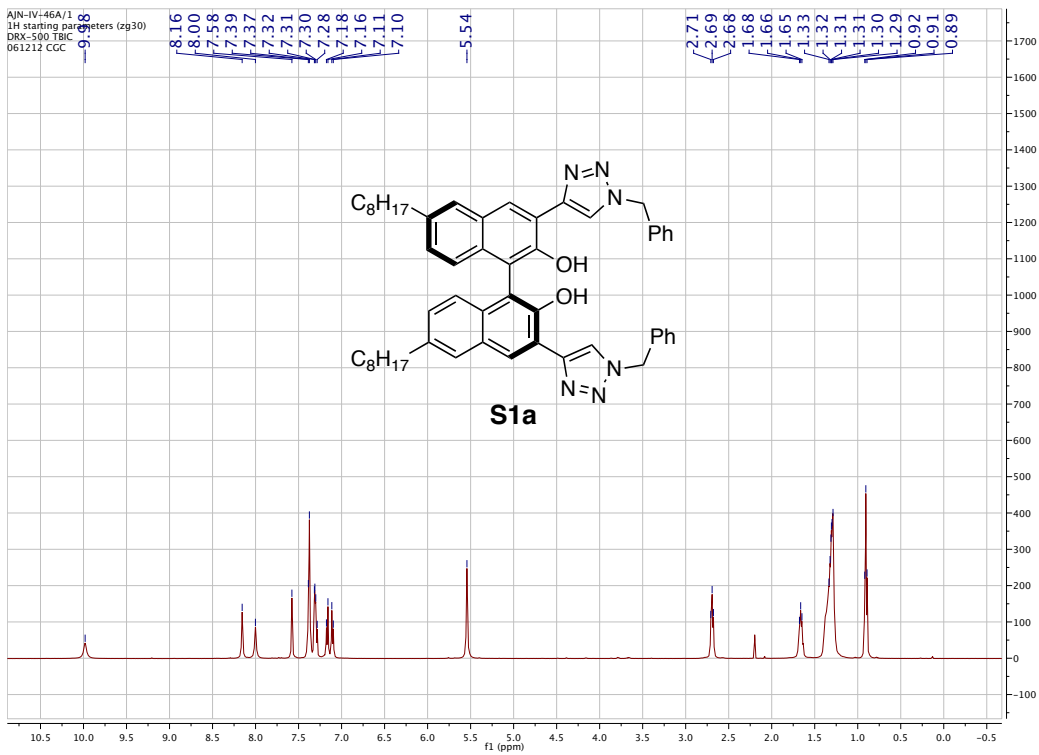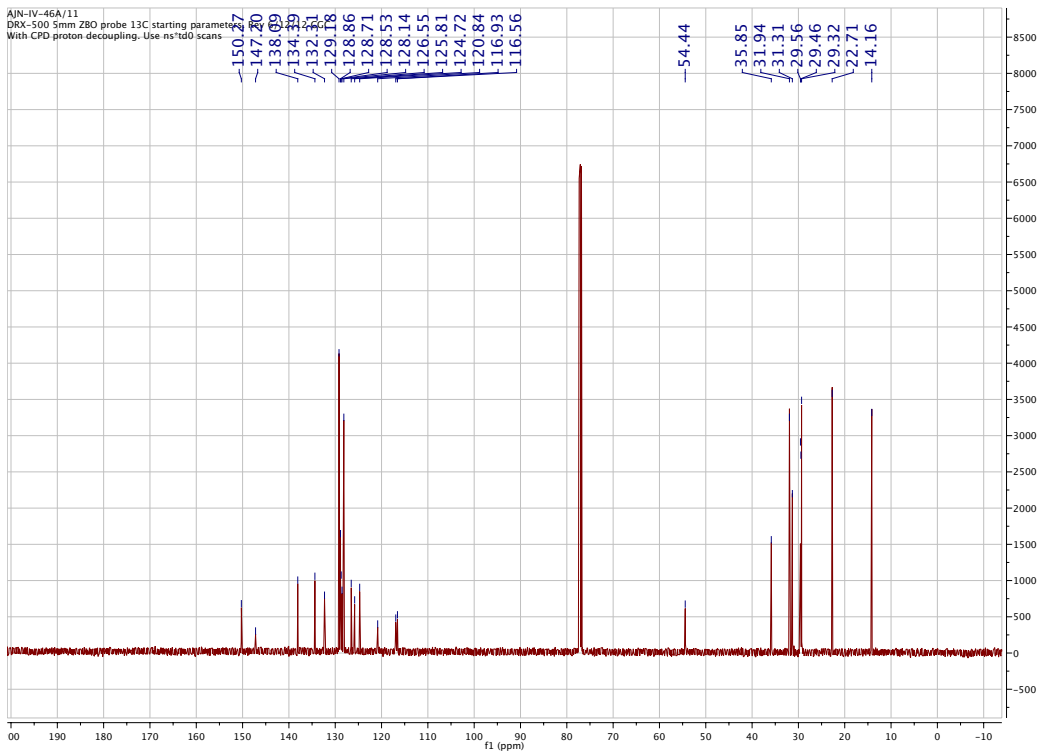

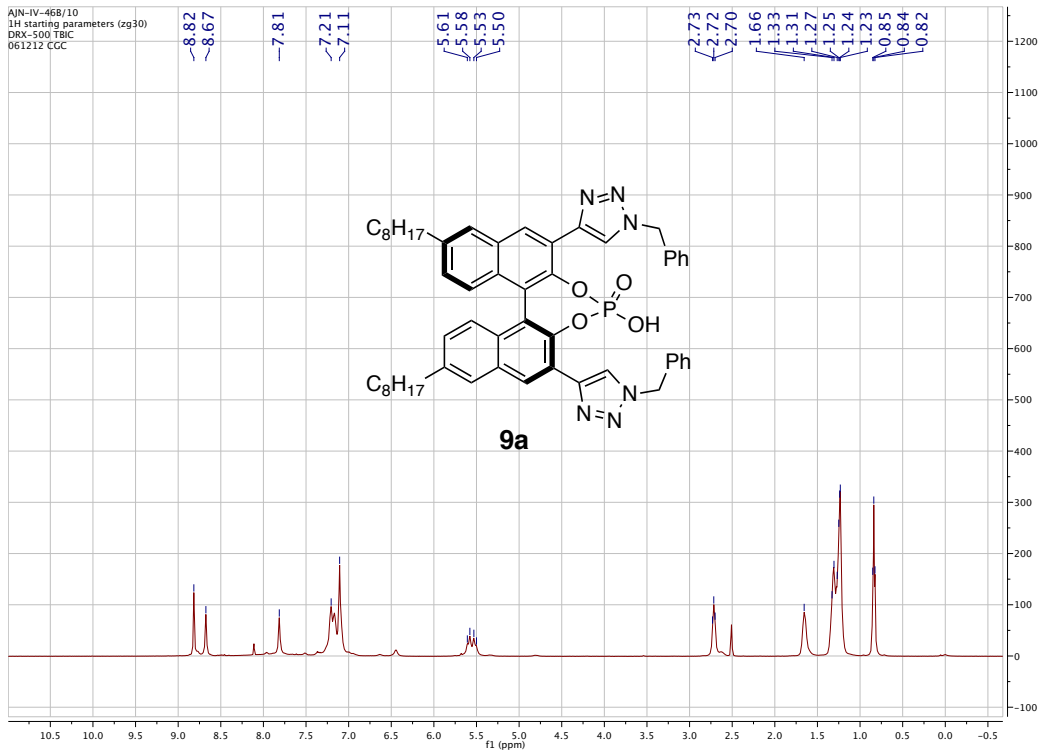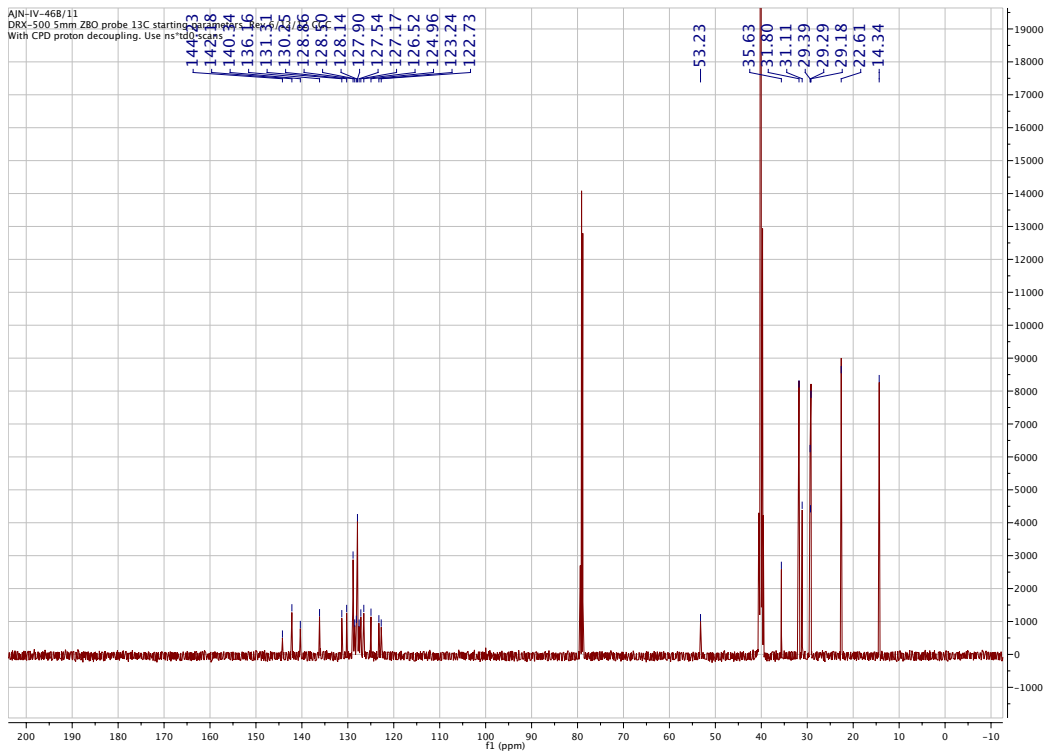

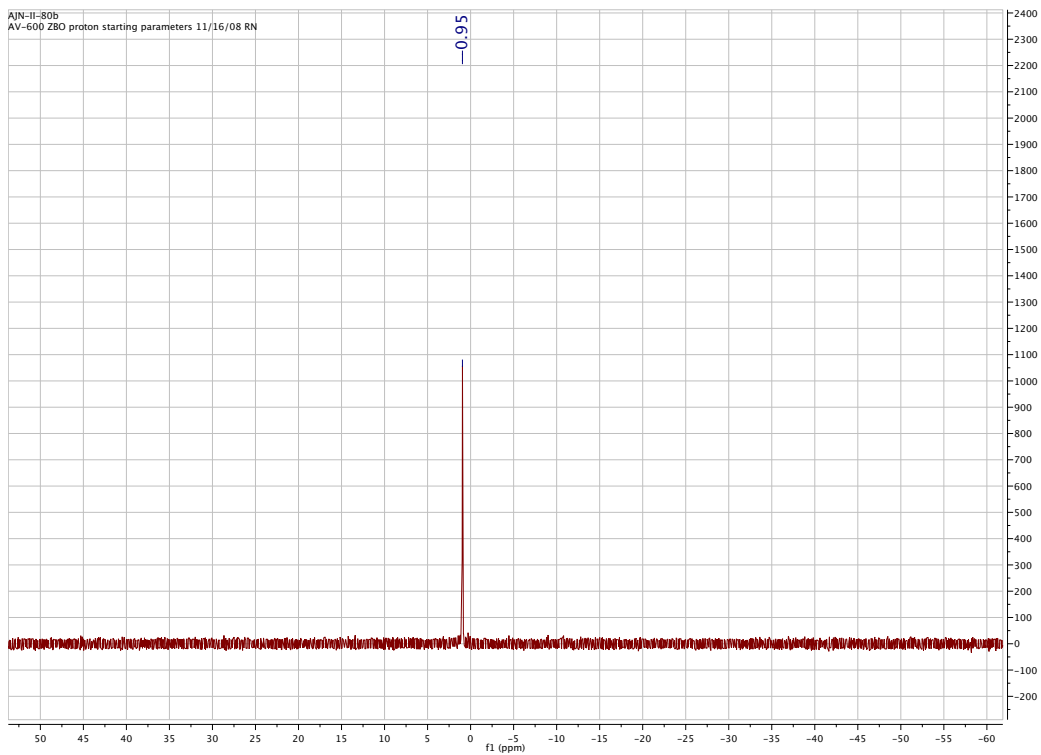

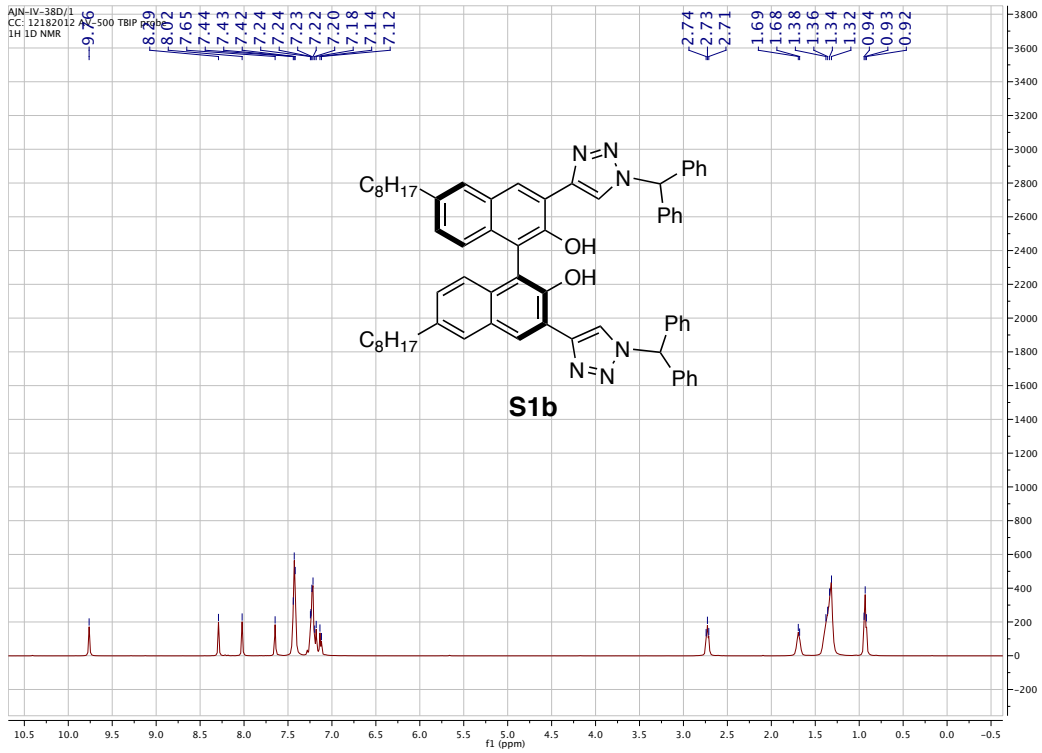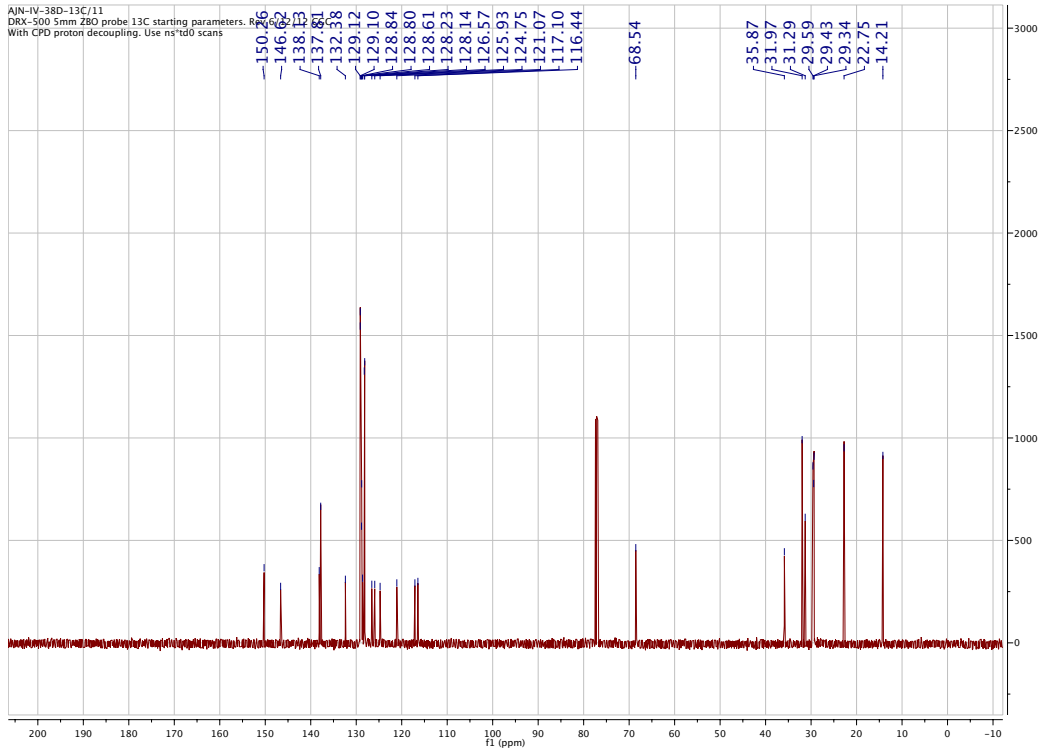



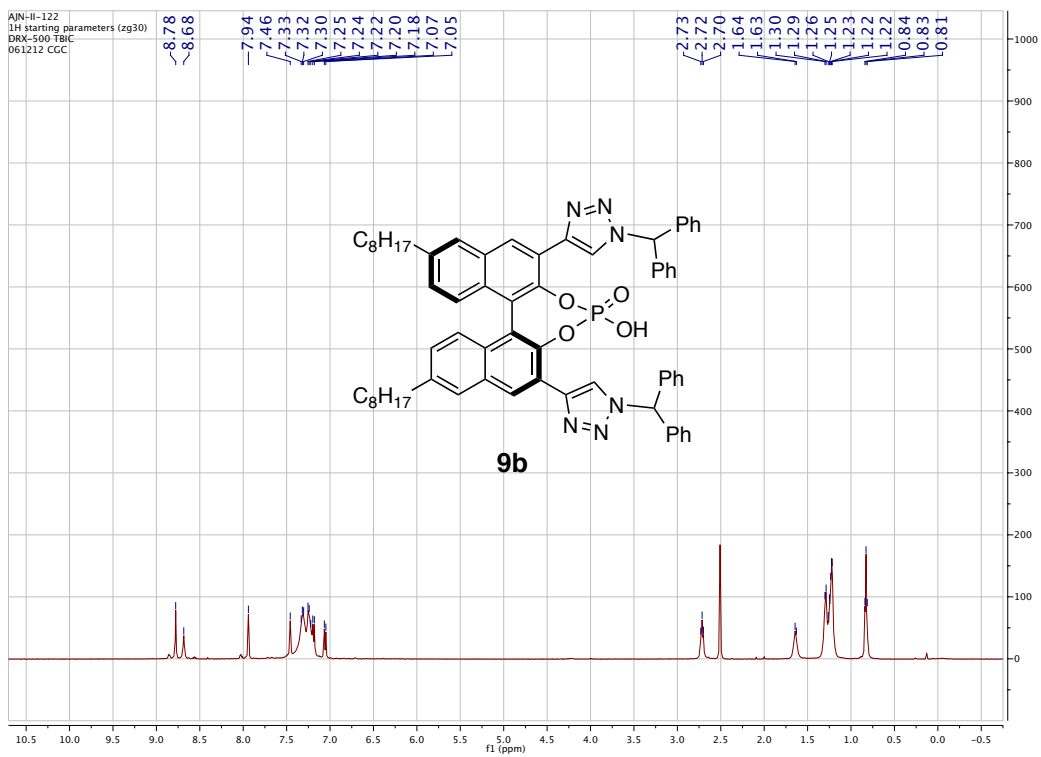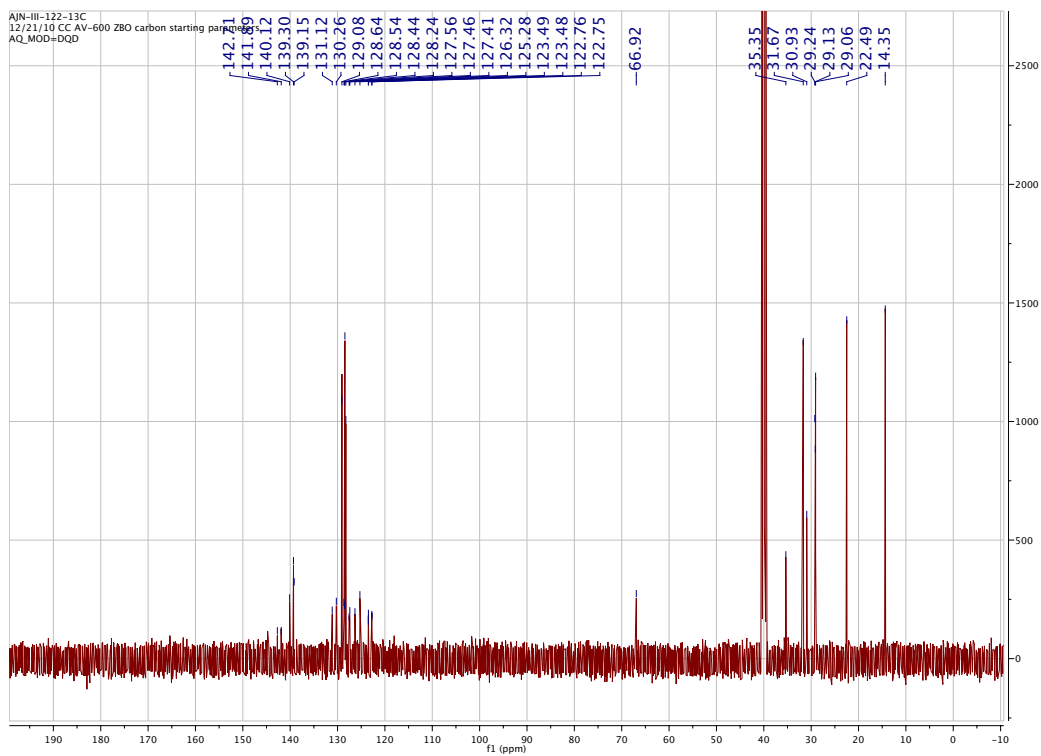

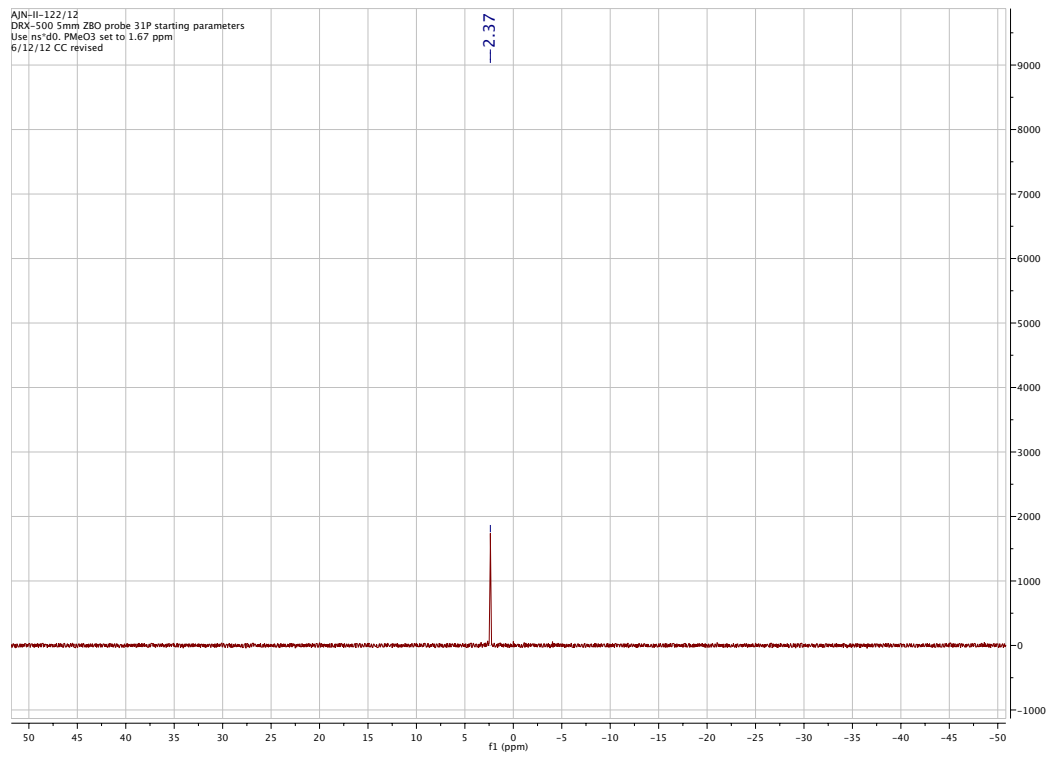

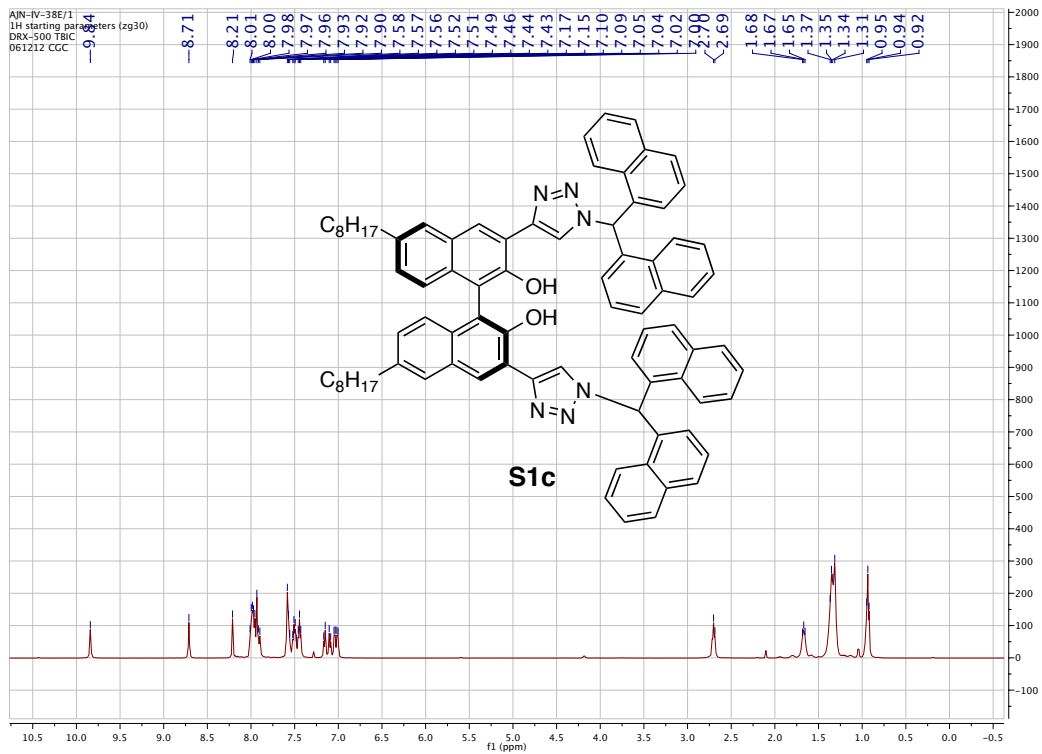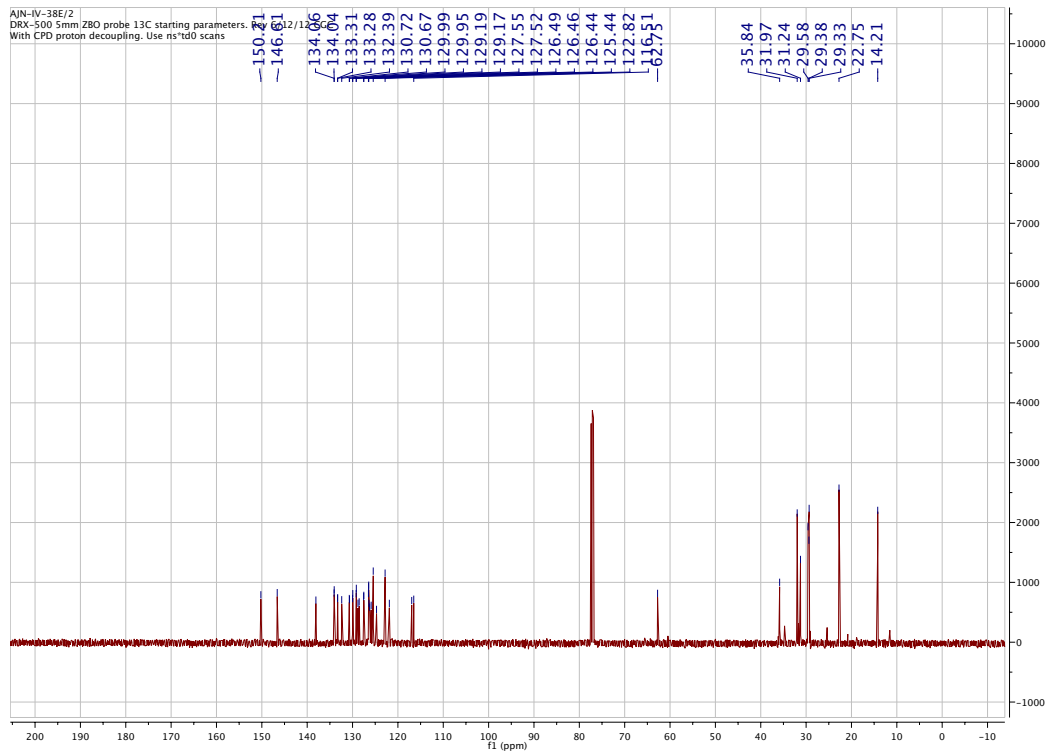

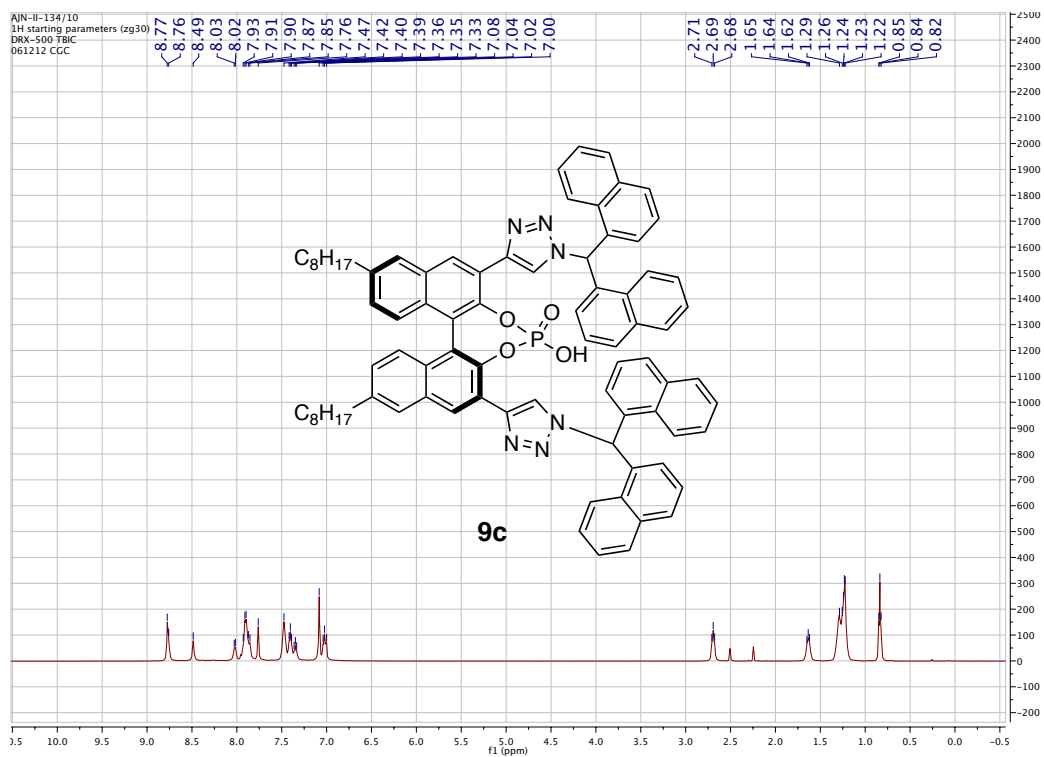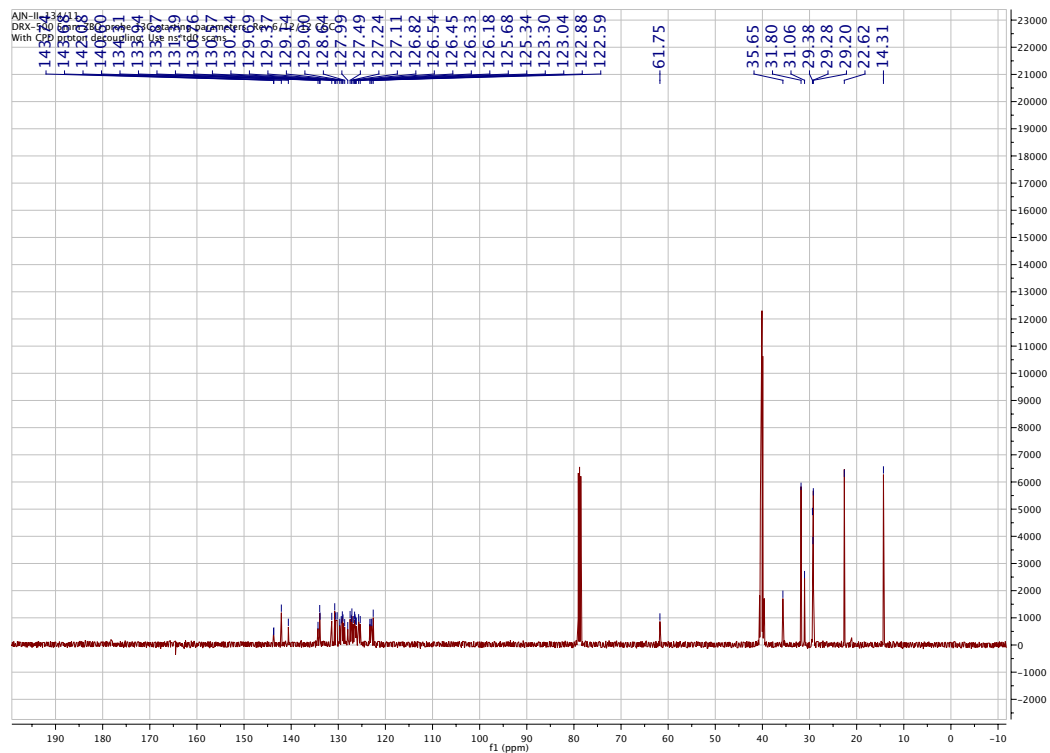

AJN-II-134/12  
DRX-500 5mm Z80 probe 31P starting parameters  
Use ns\*40; PMeOS set to 1.67 ppm  
6/12/12 CC revised

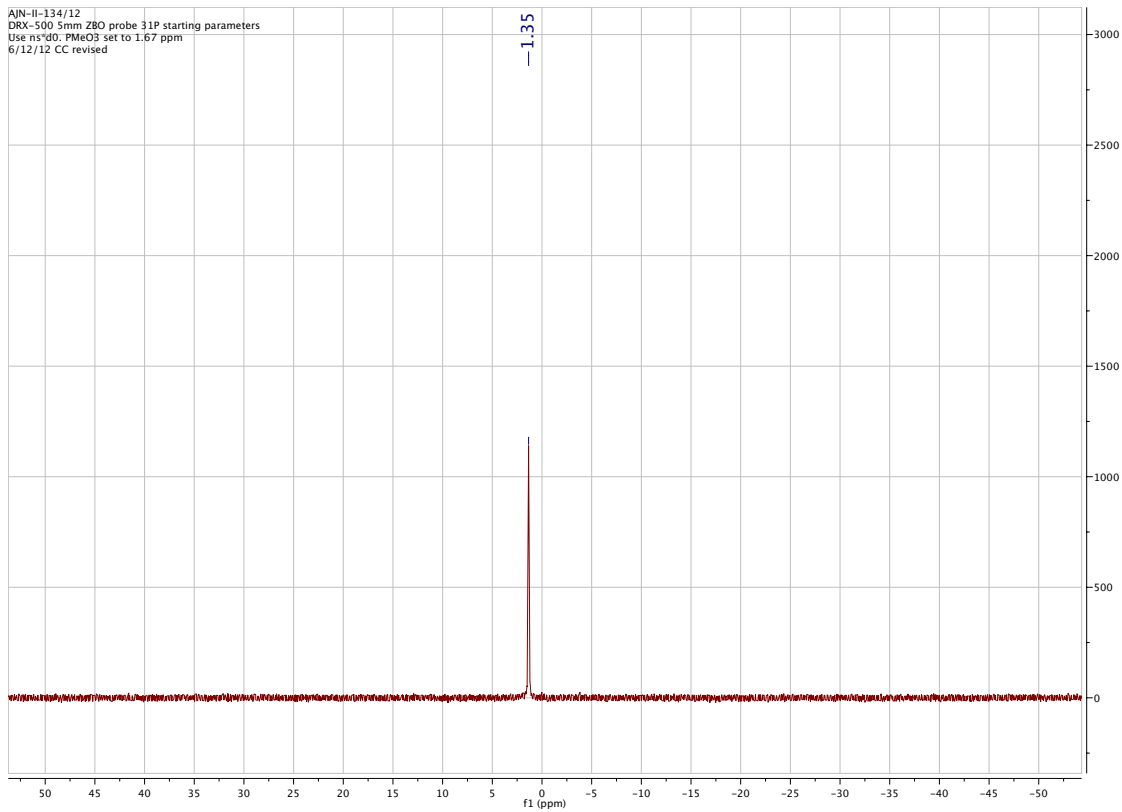

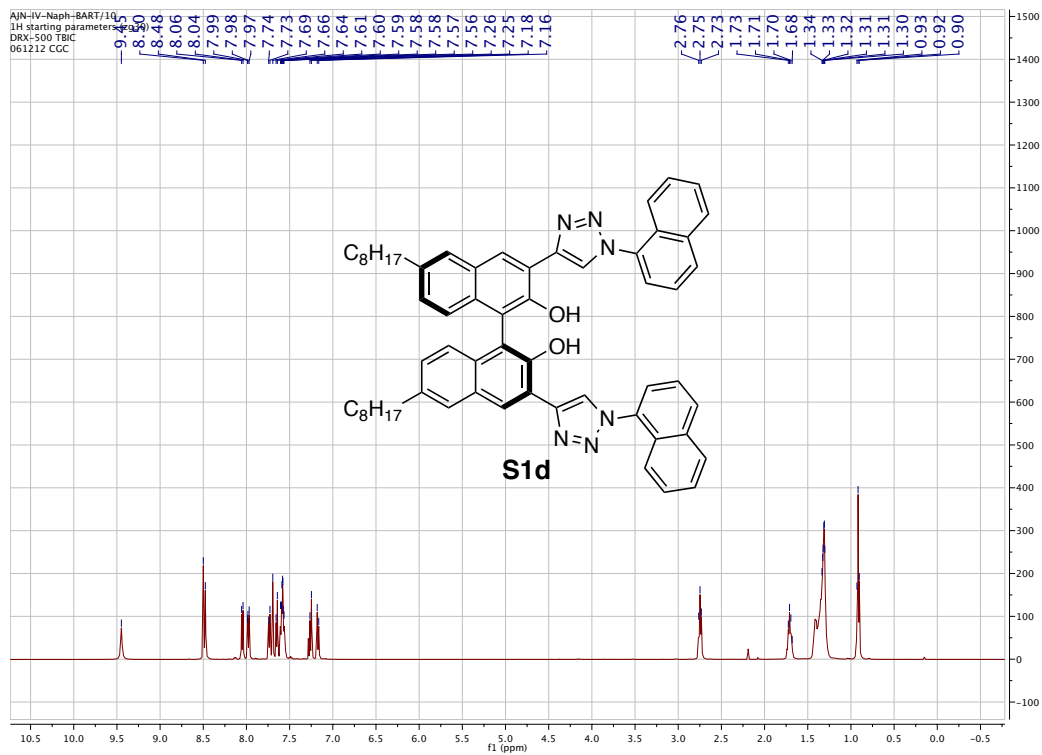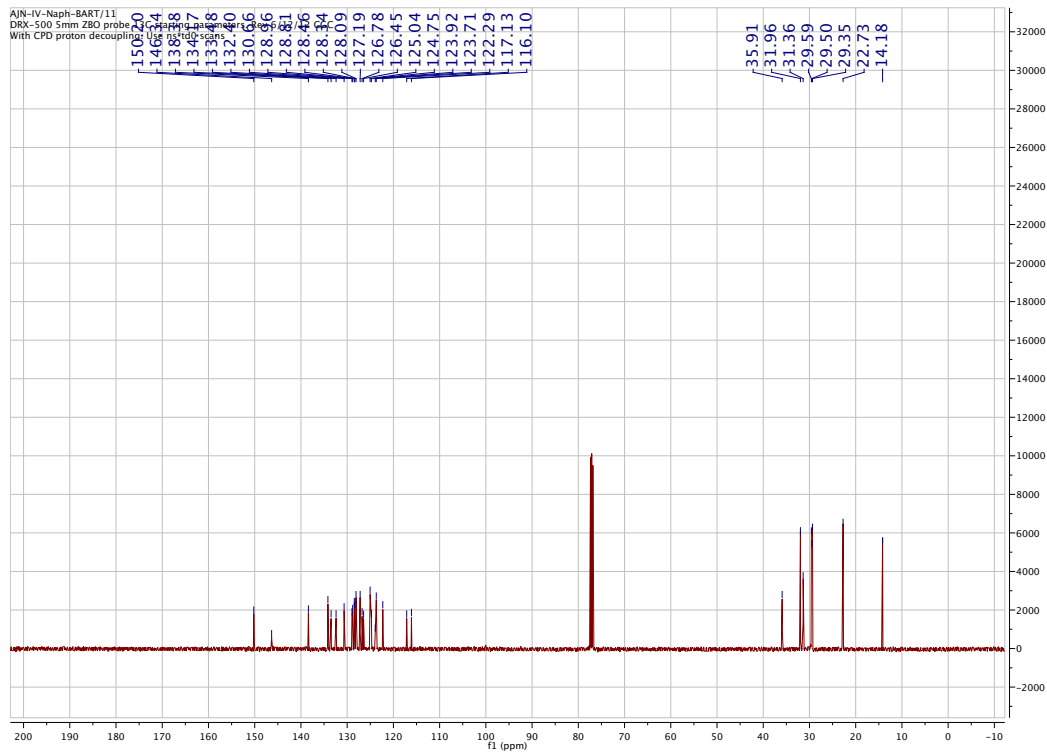

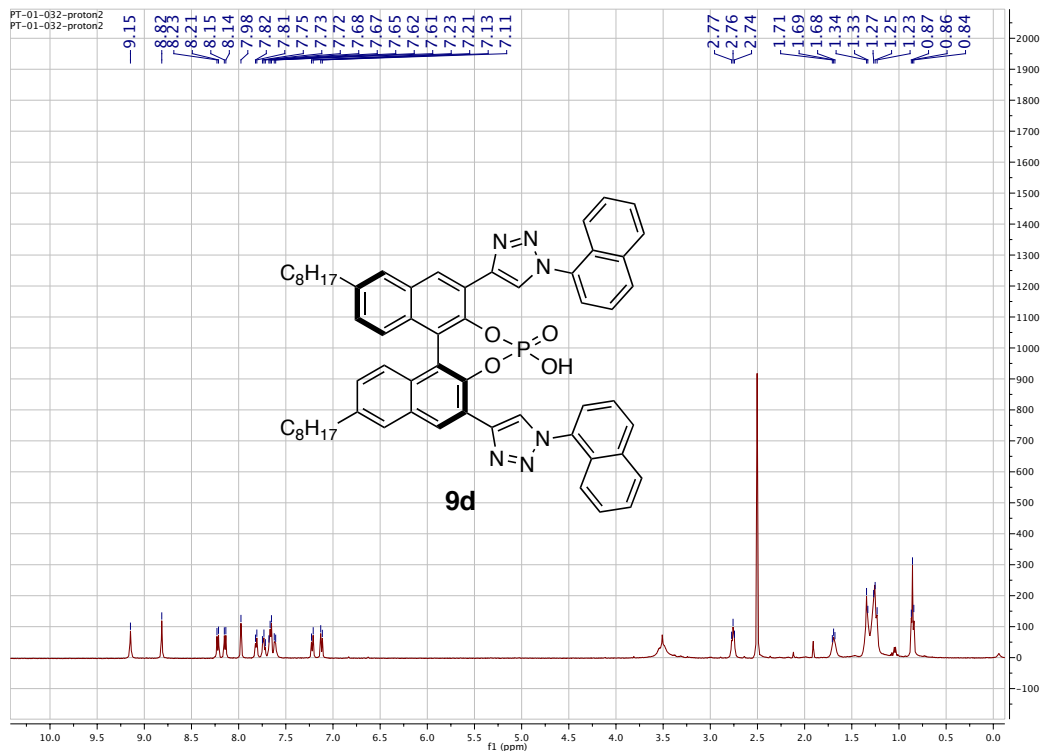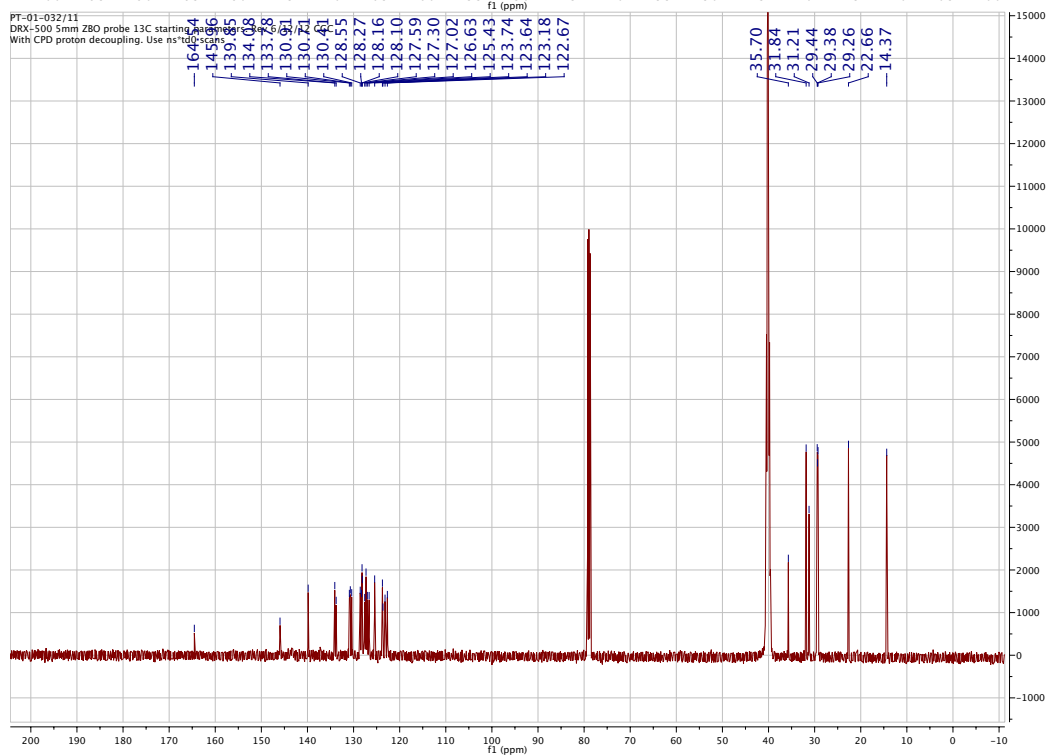

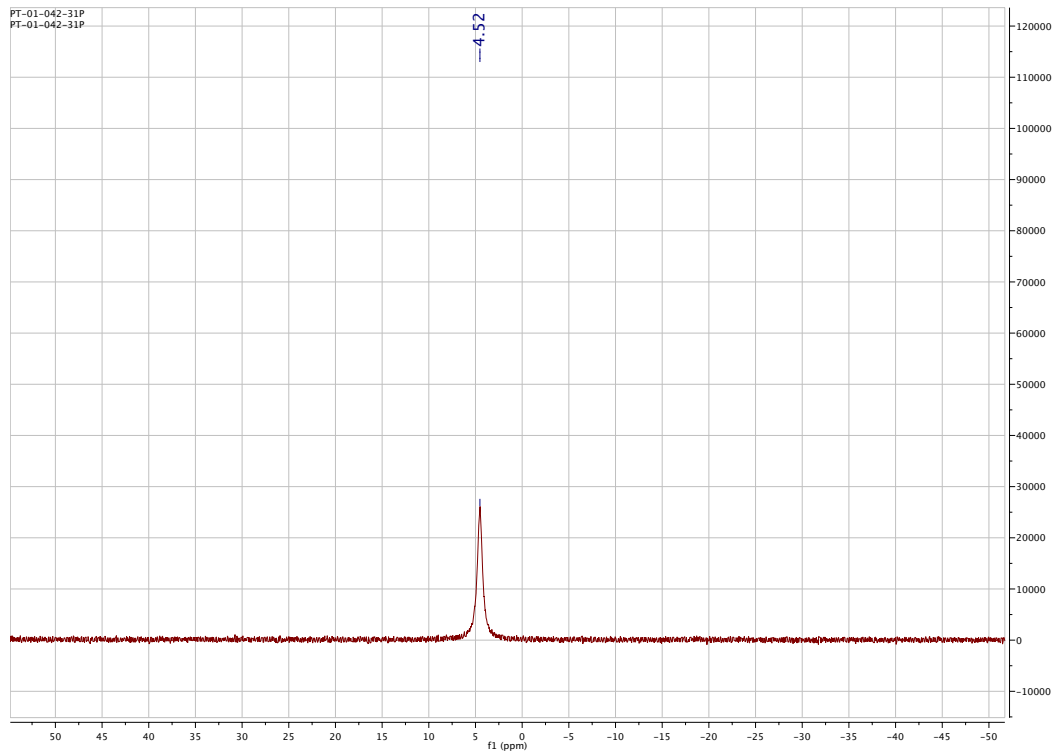



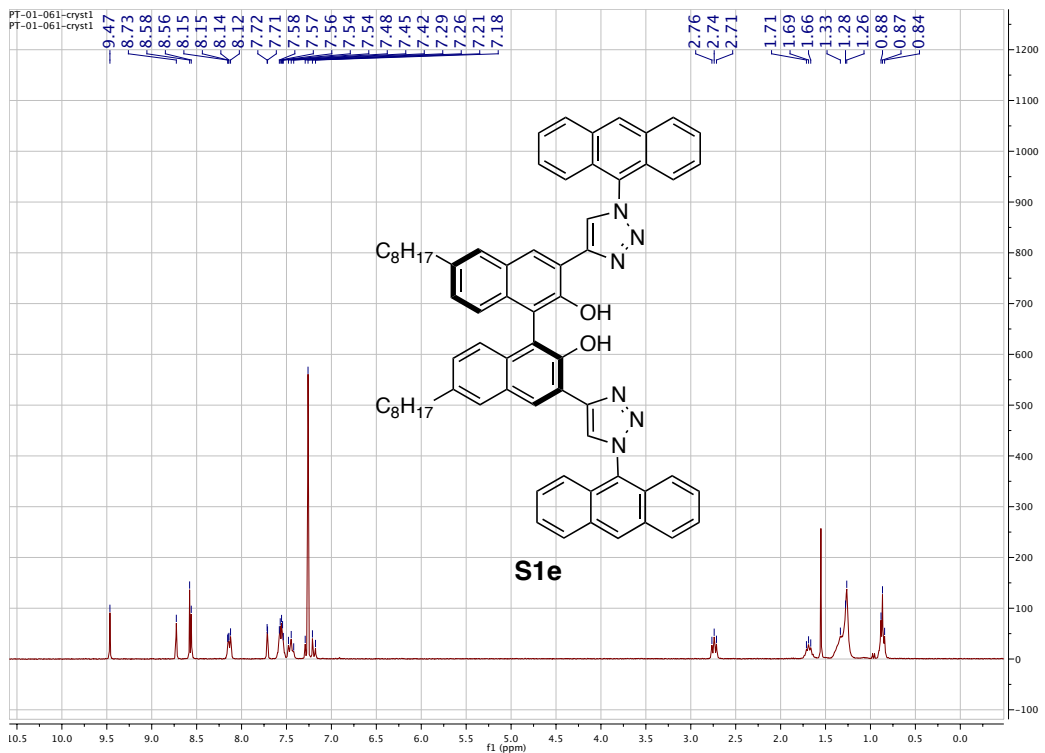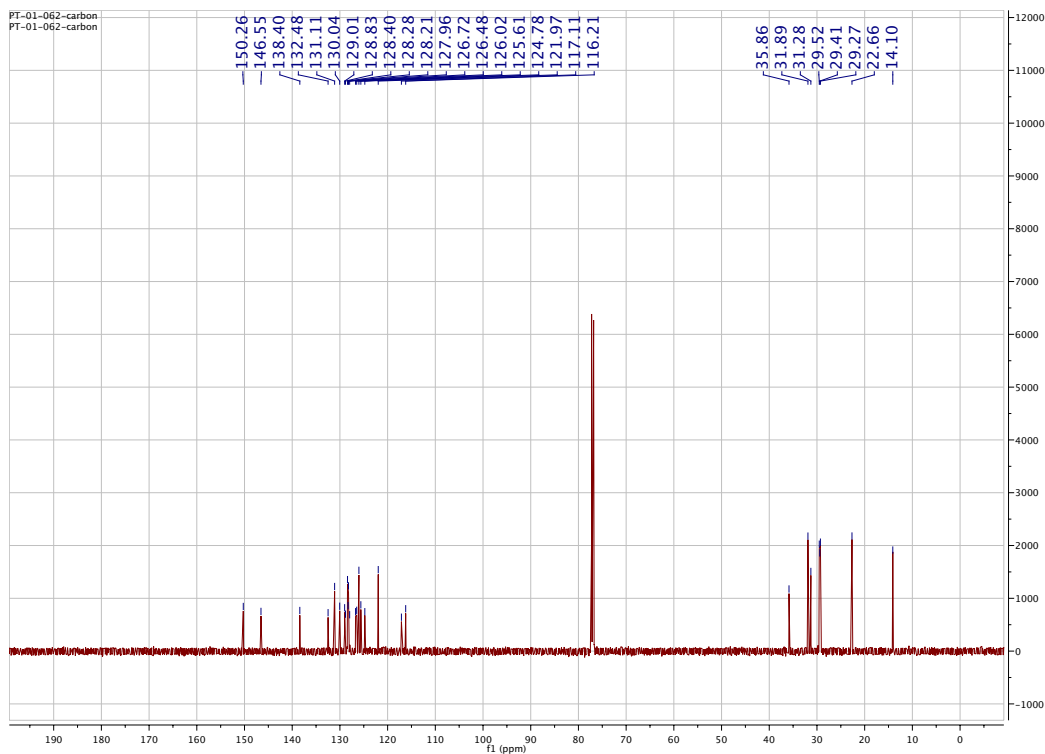

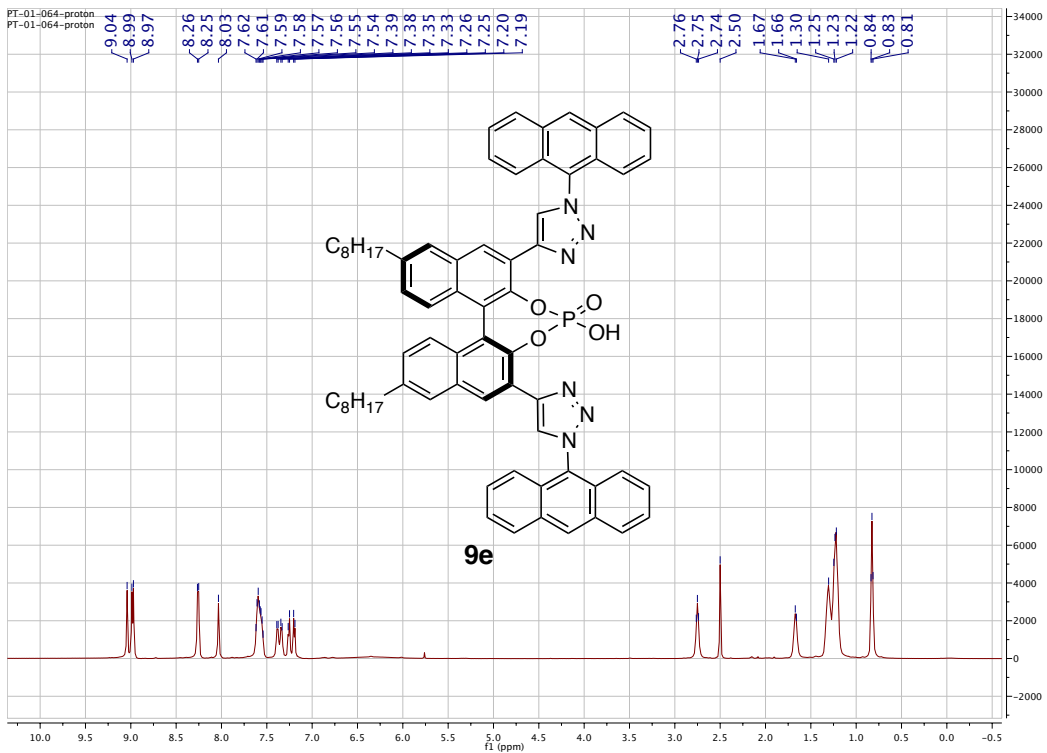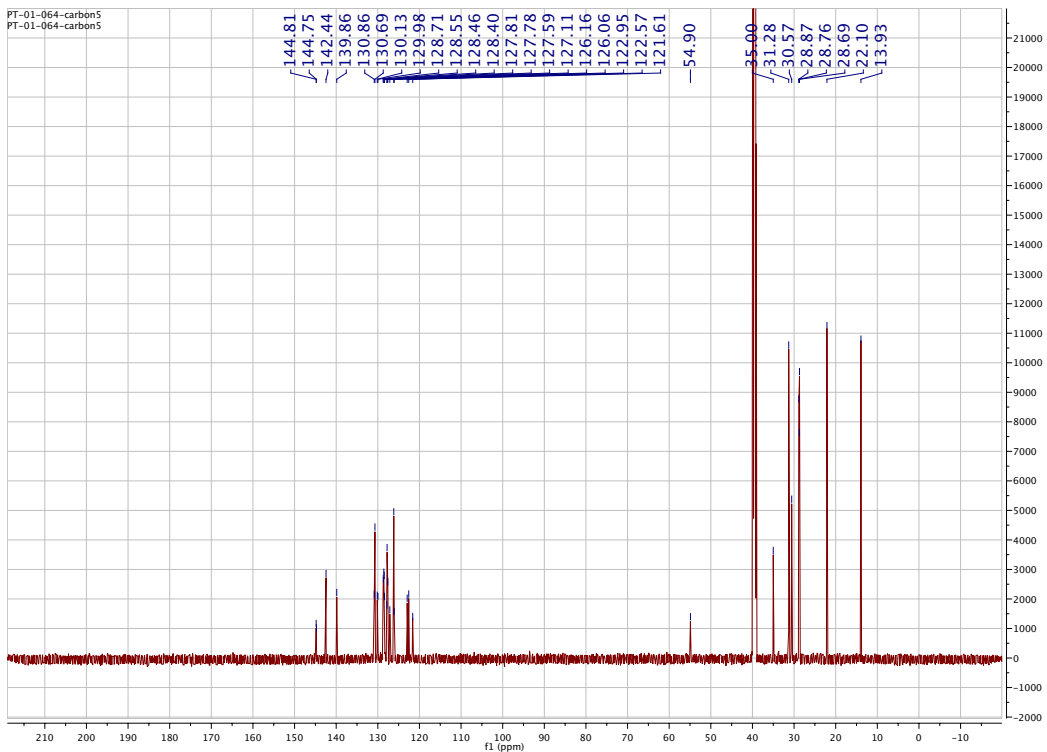

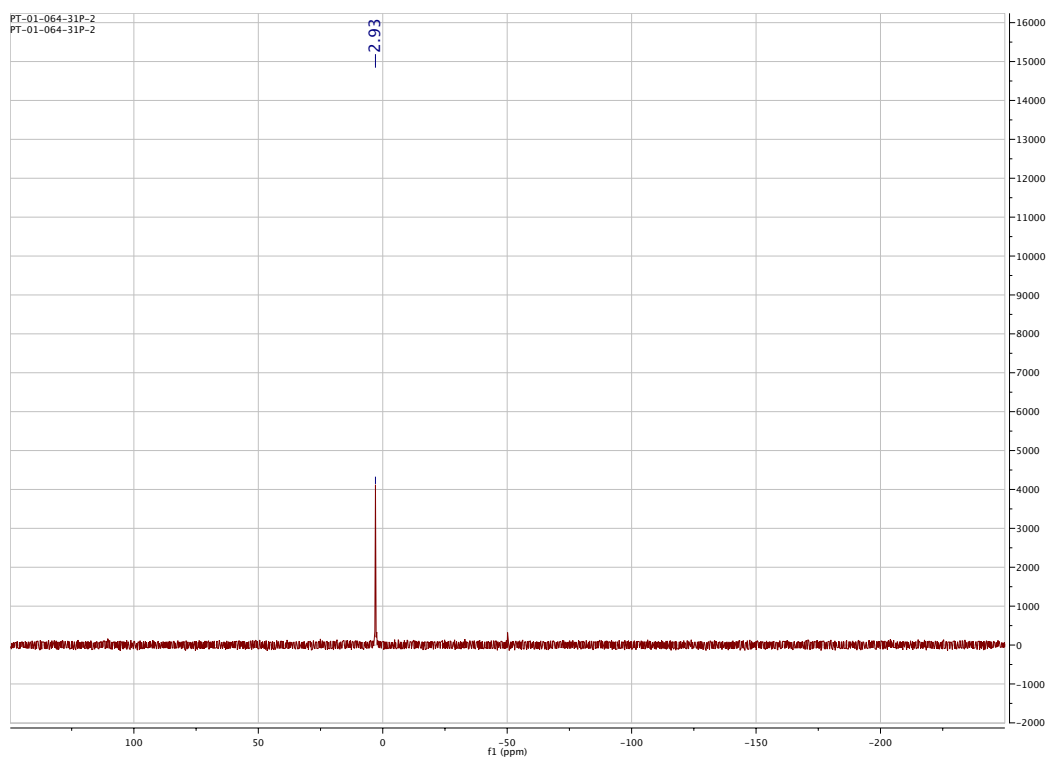

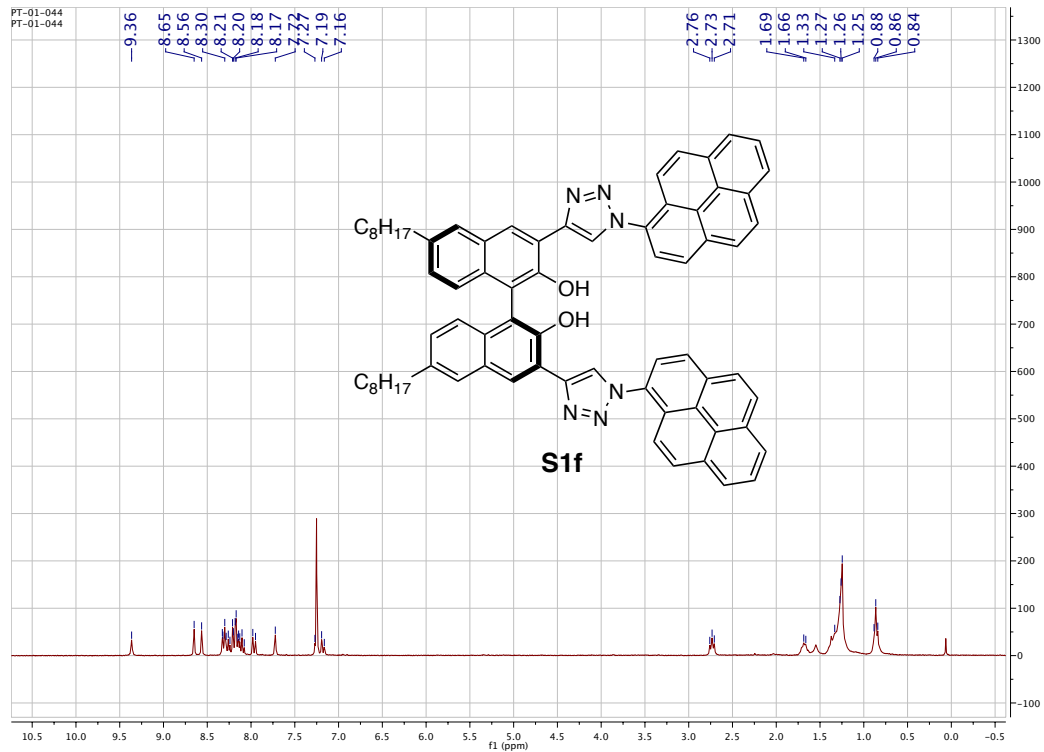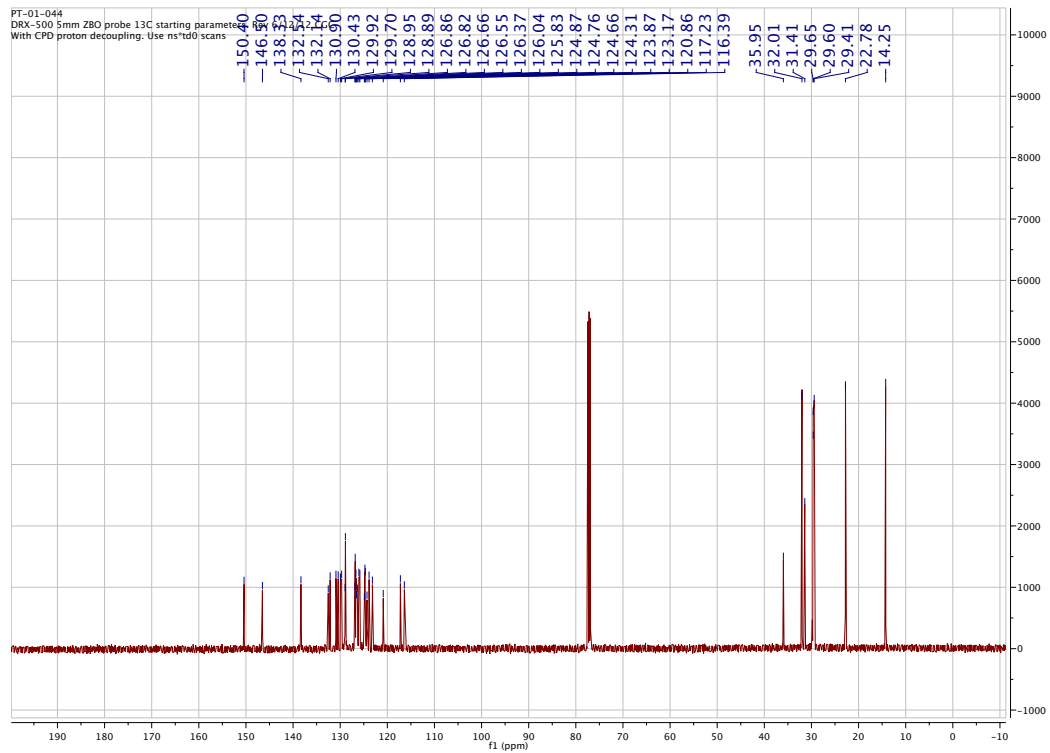

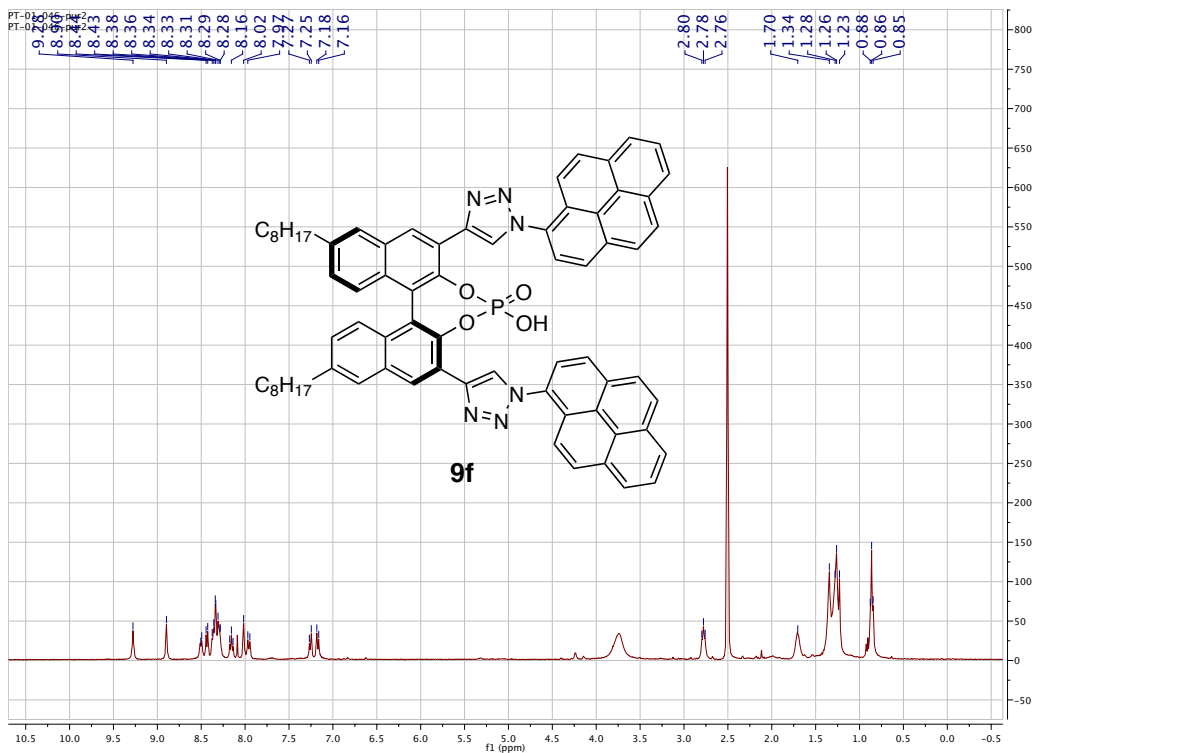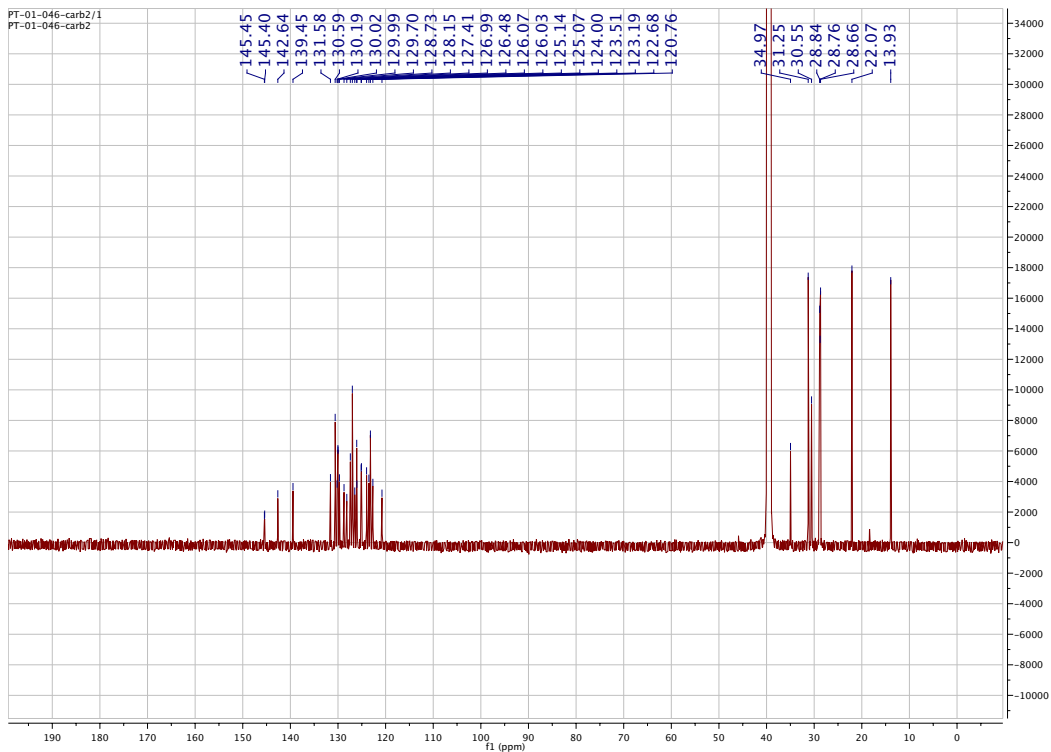

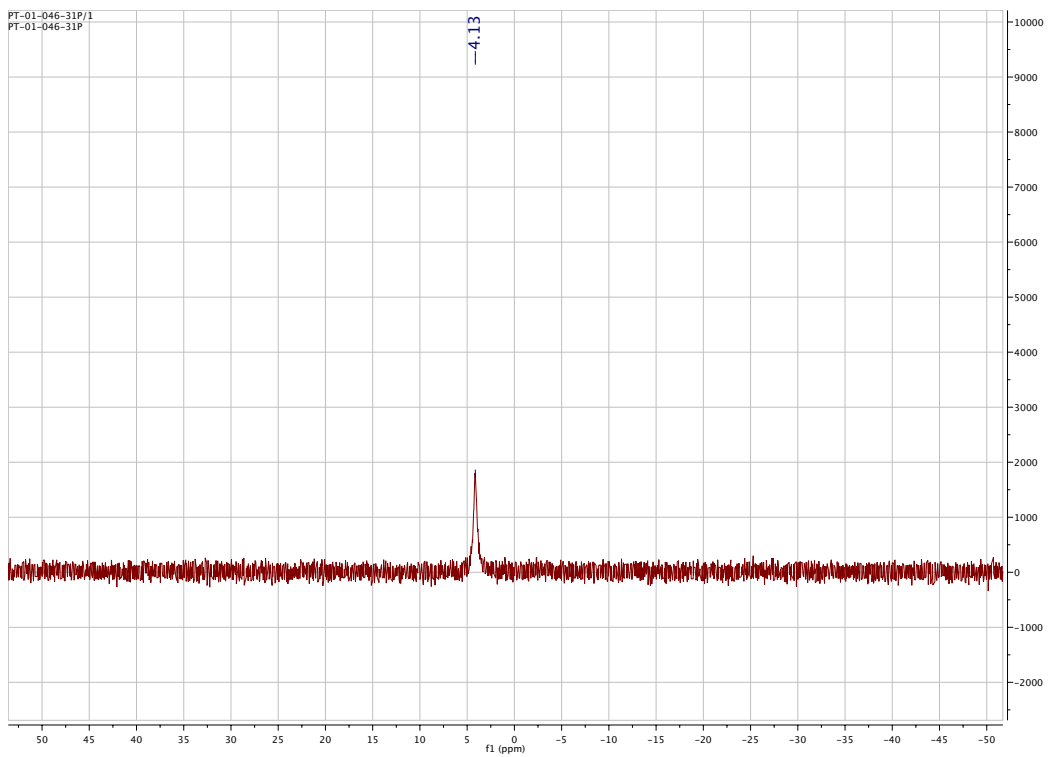

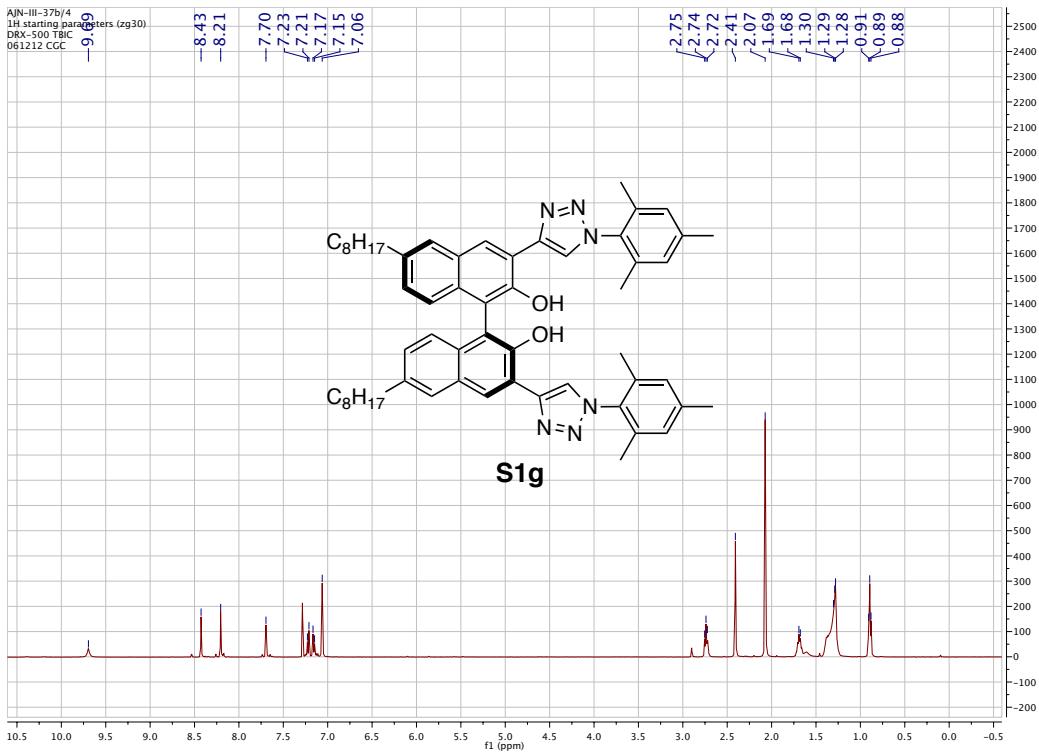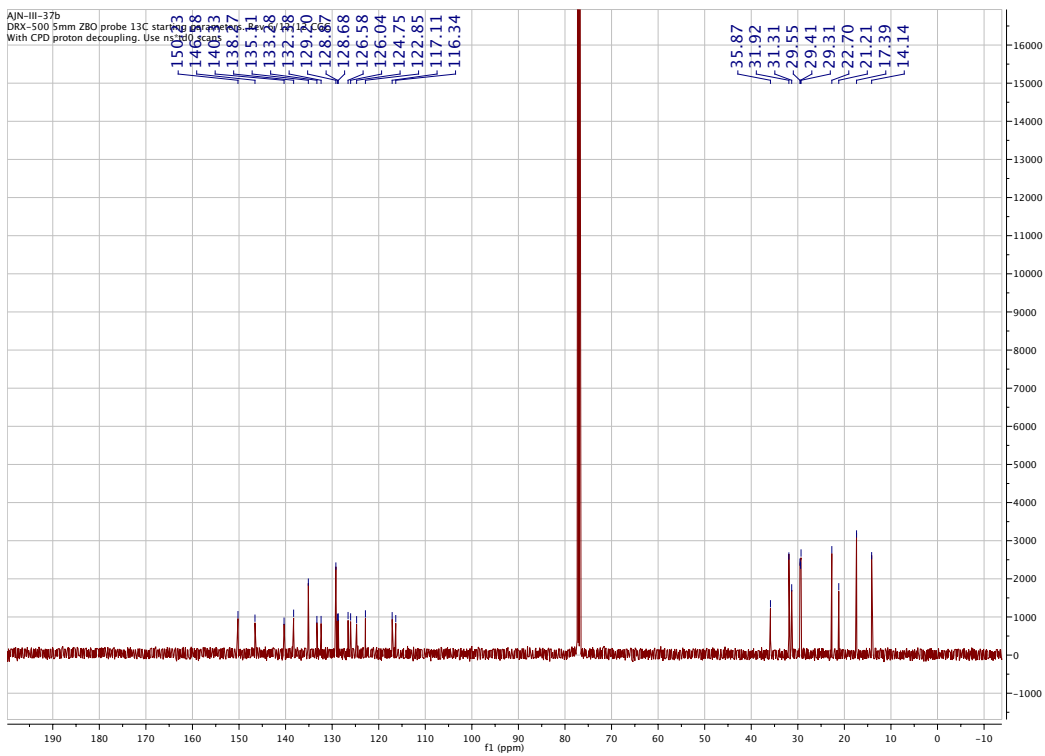

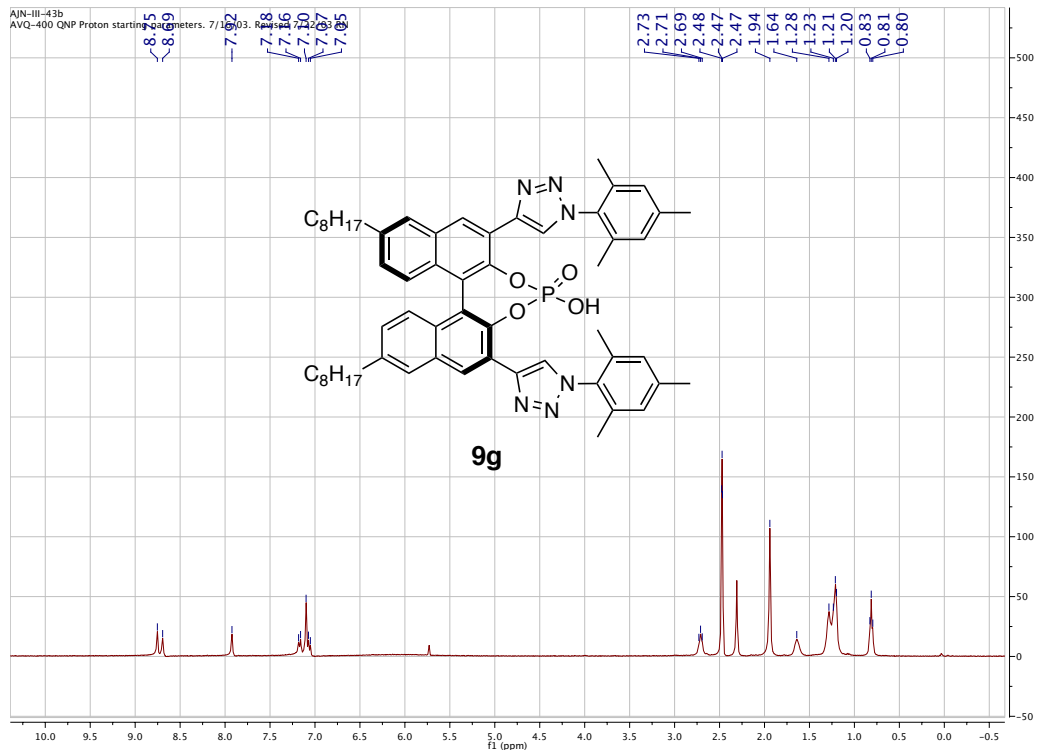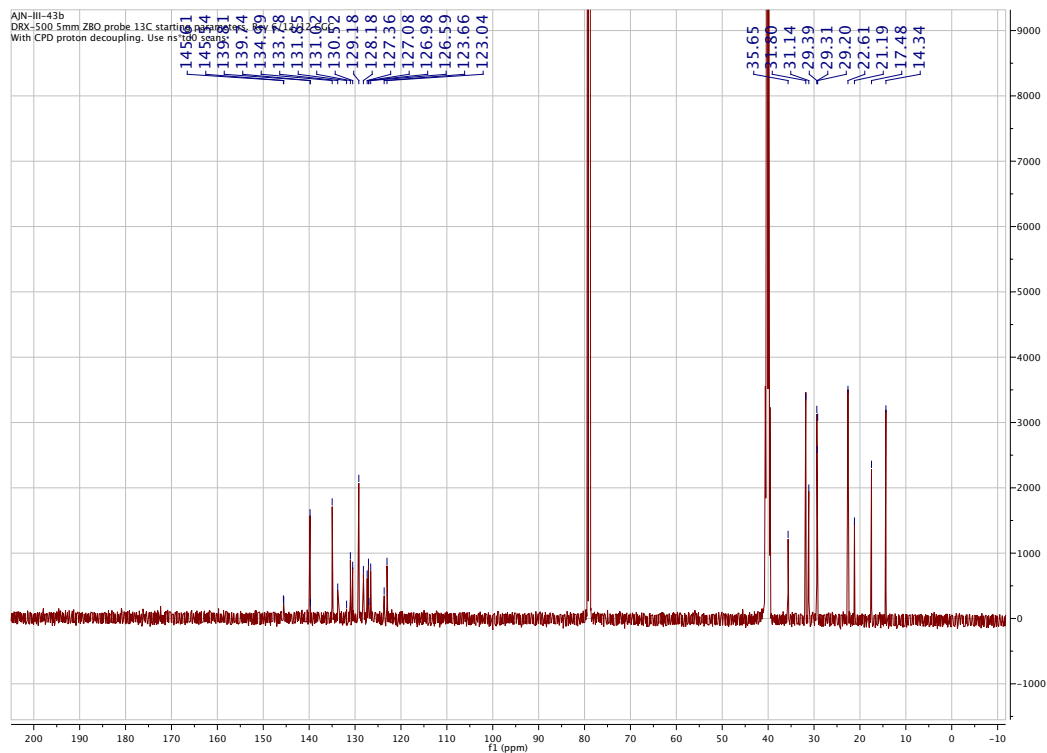



AIN-III-43  
AVQ-400 QNP 31P Starting parameters. Trimethyl phosphate=3.0 ppm. 7/16/03 Rev 2/03 RN

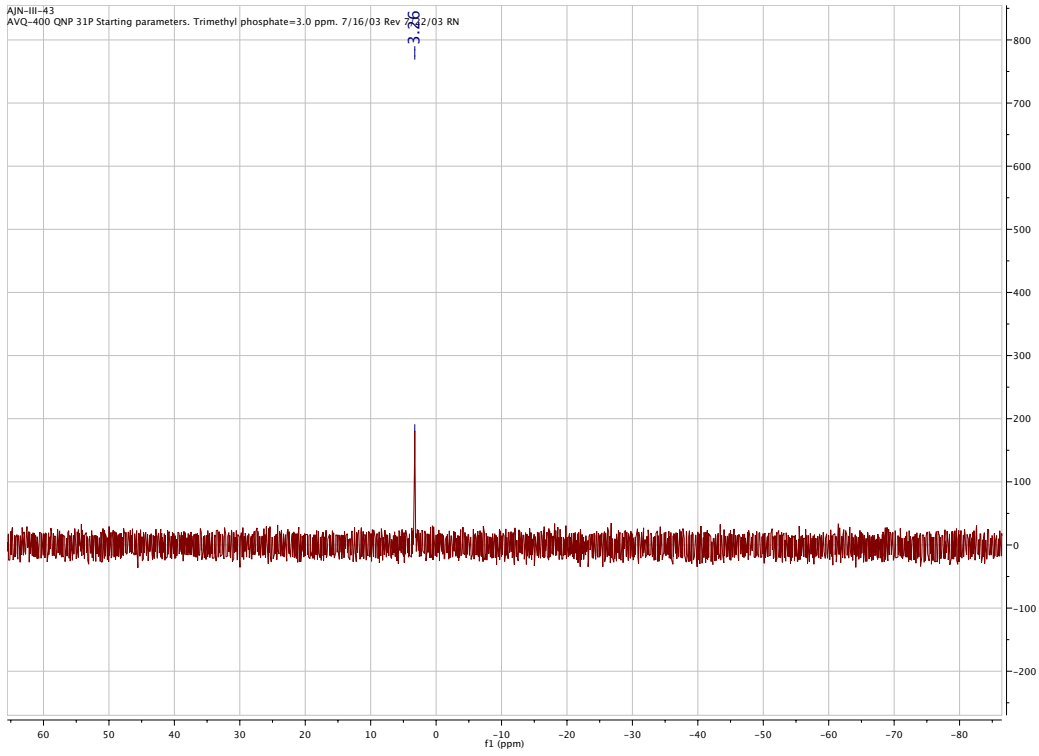

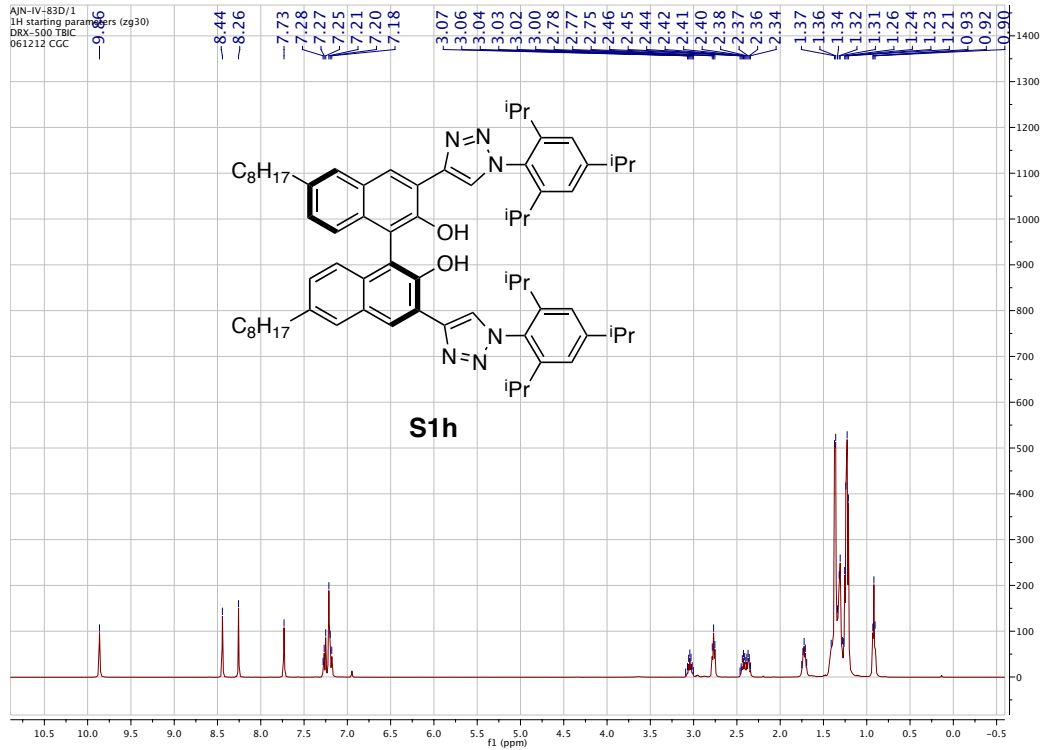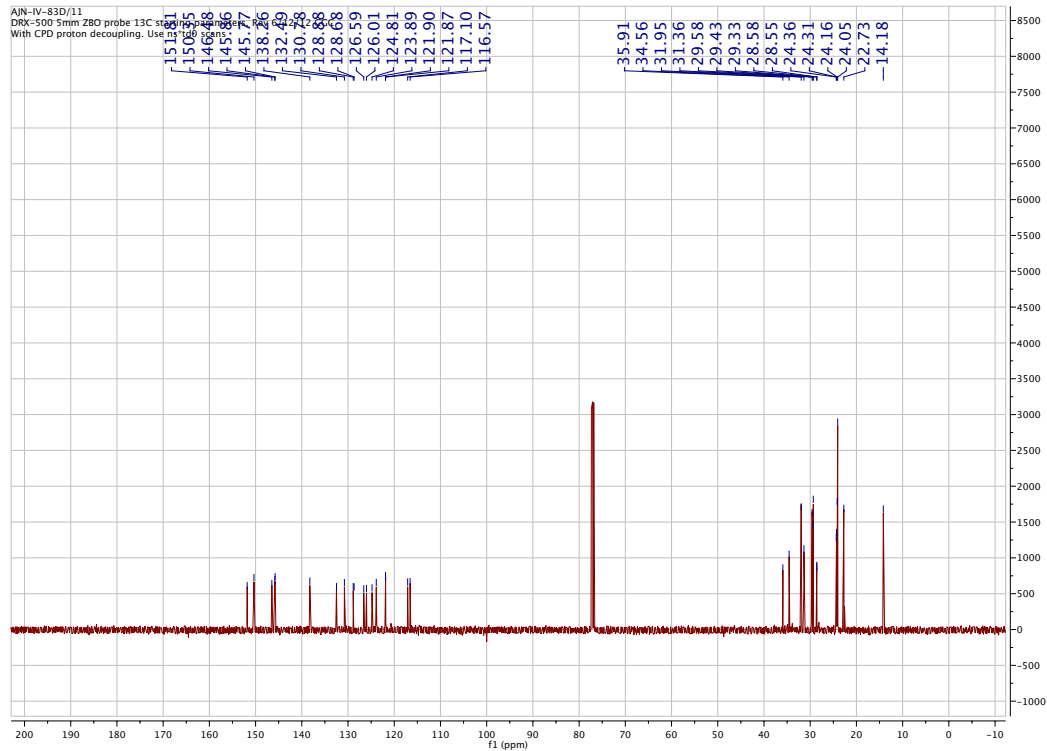

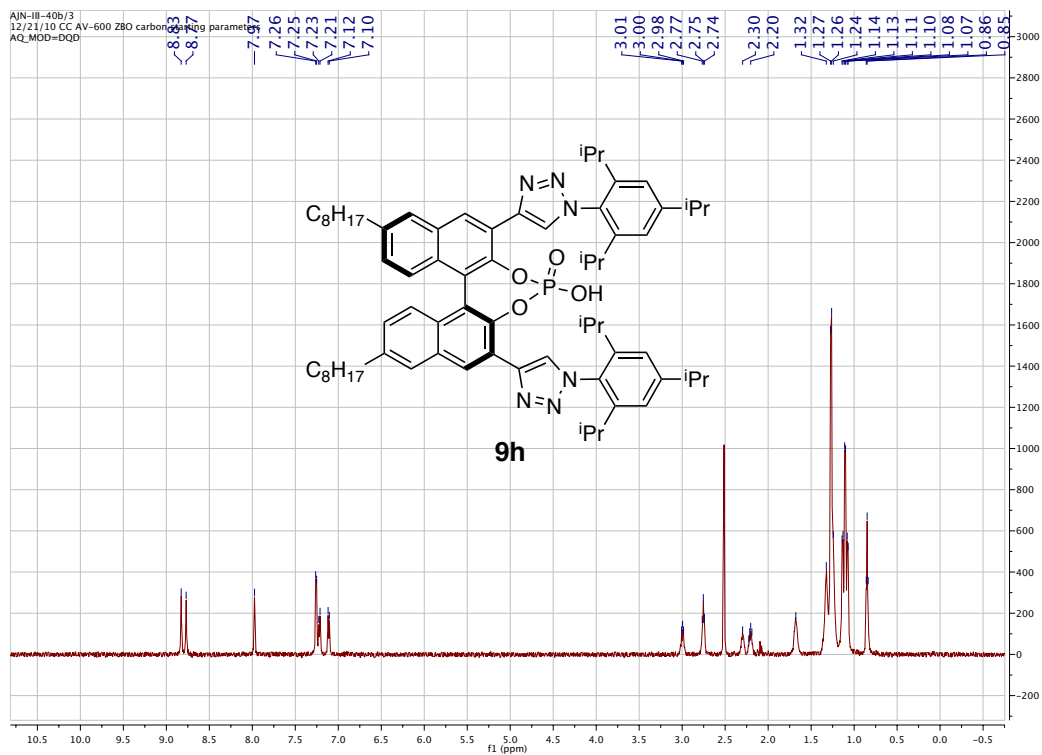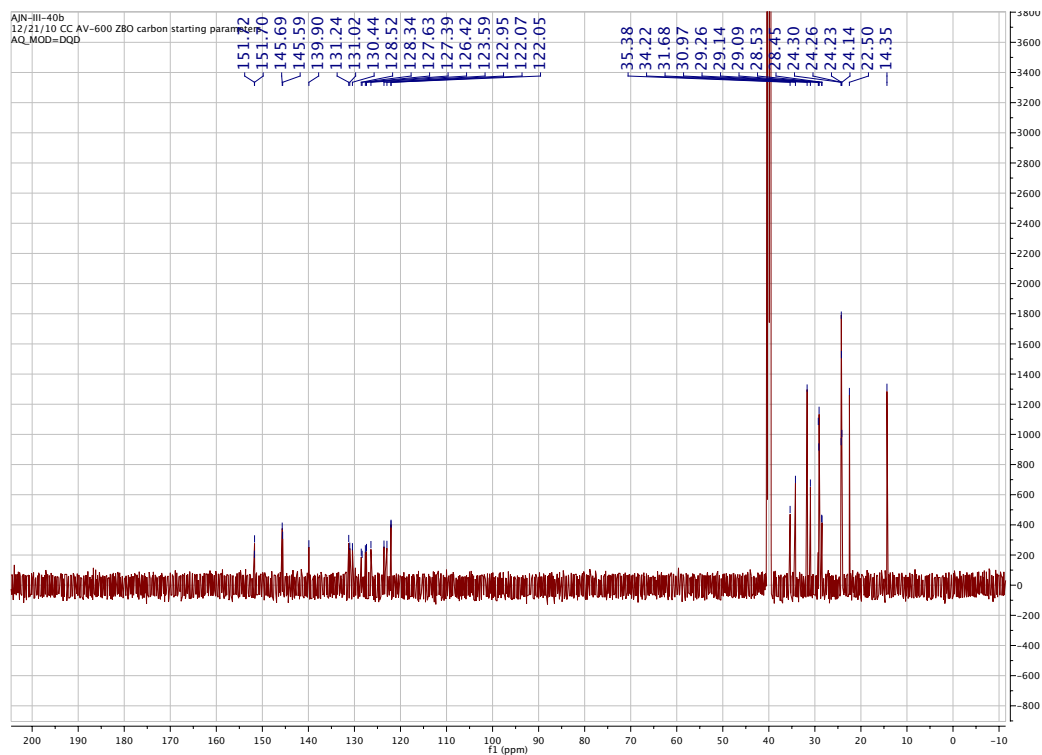

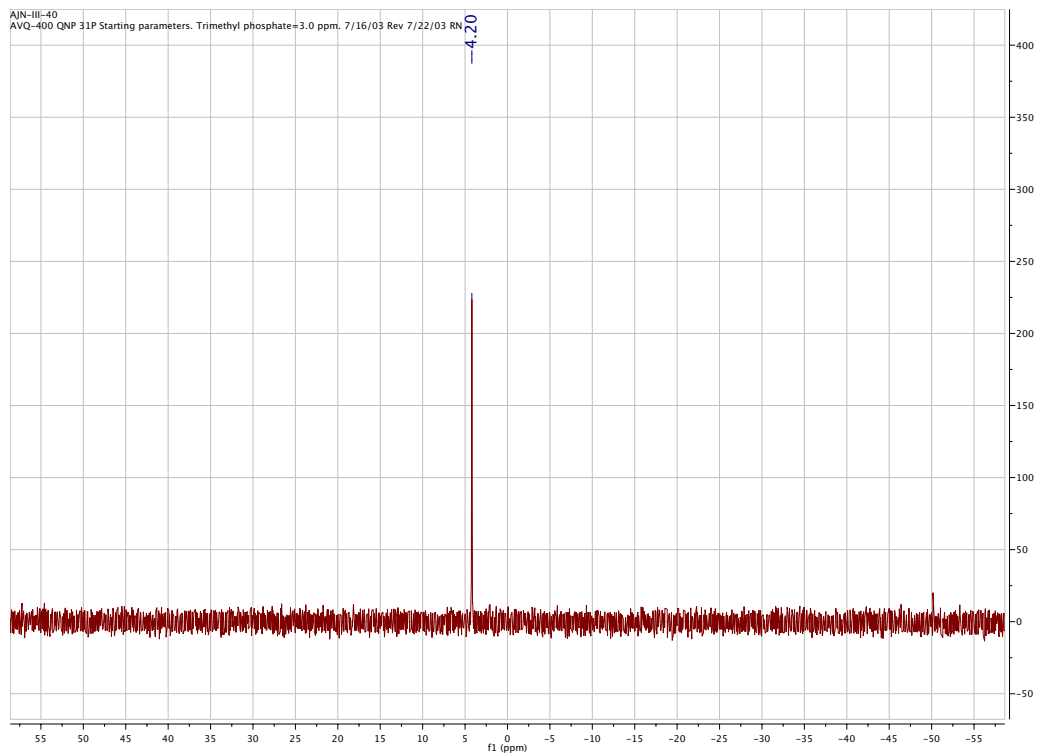

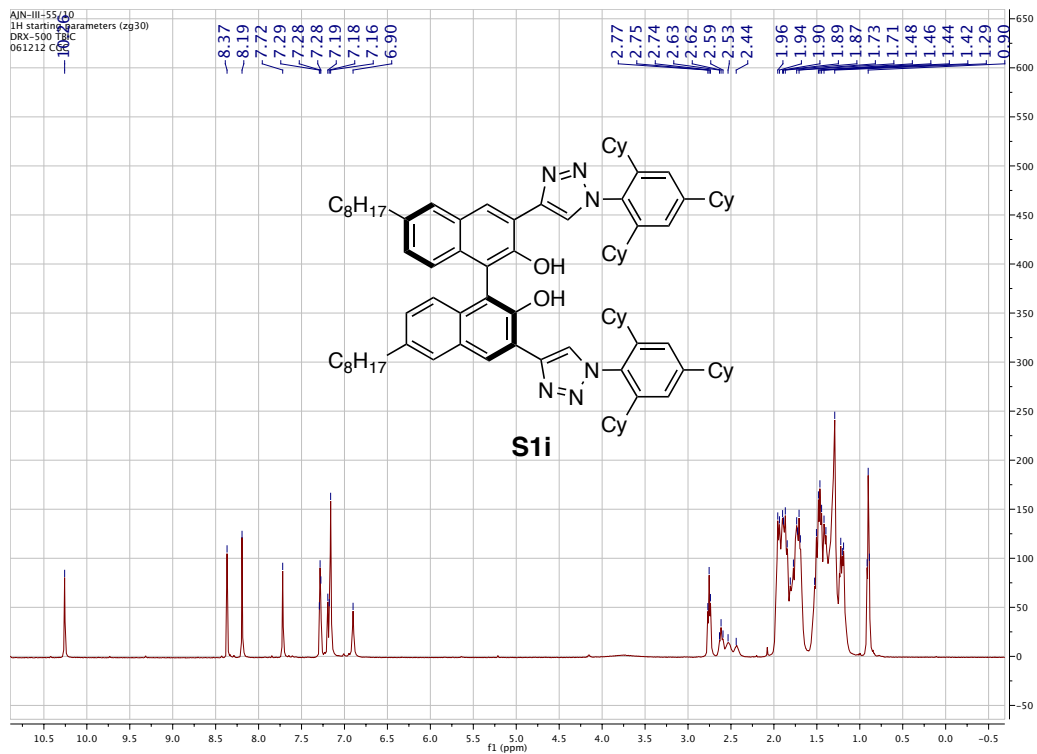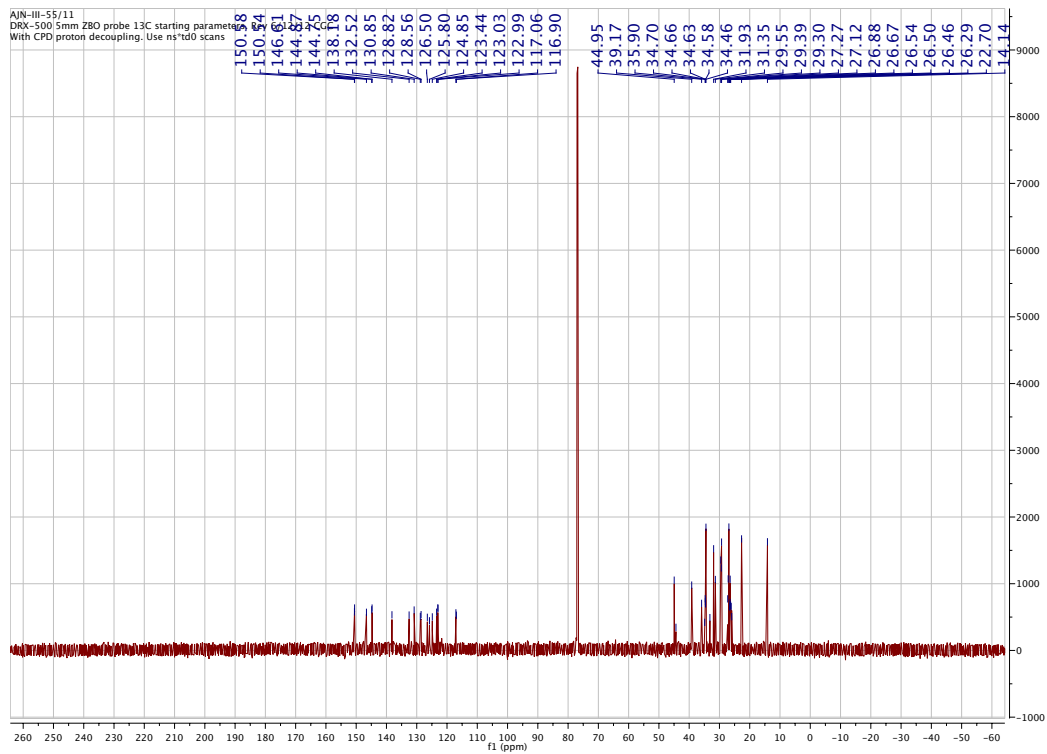

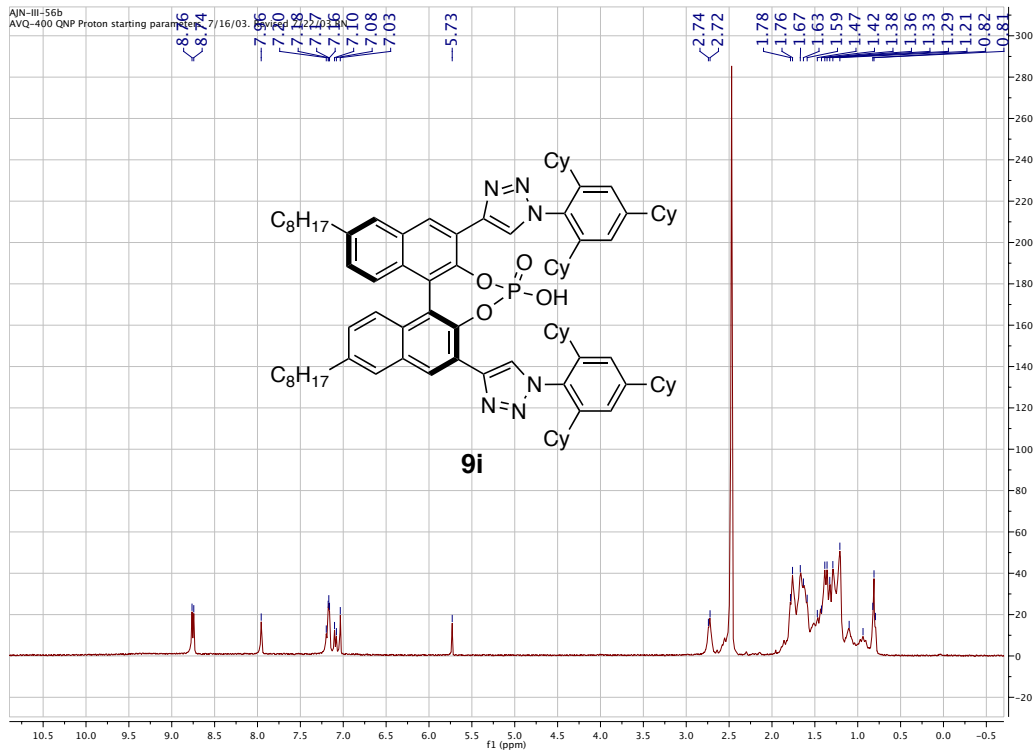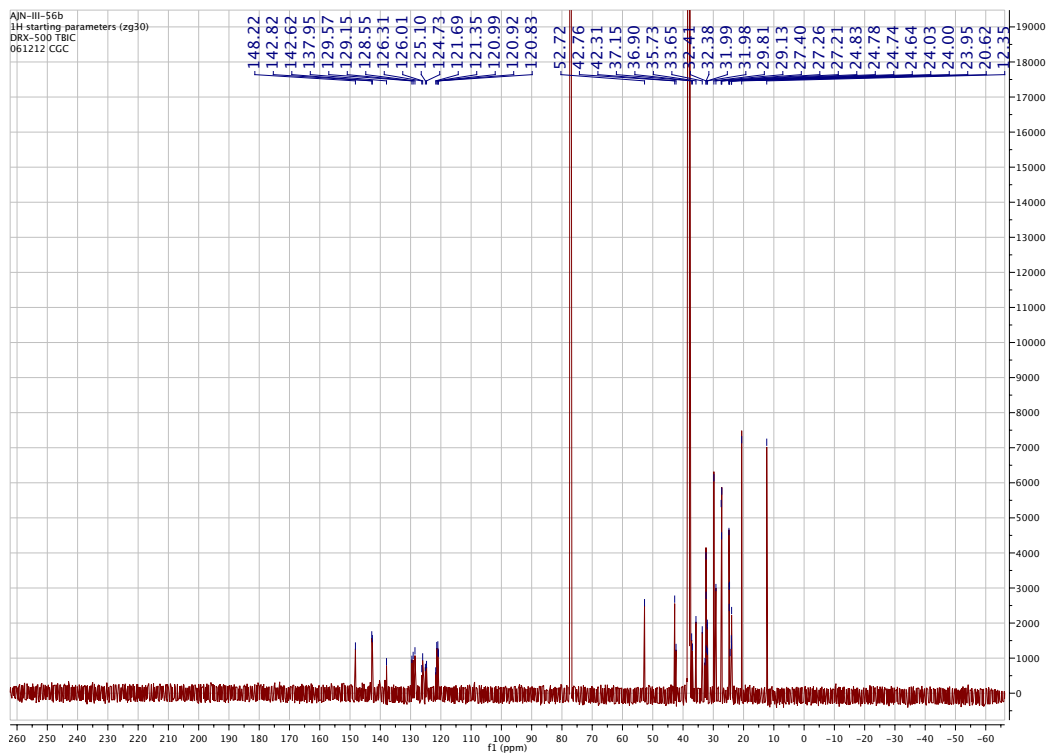

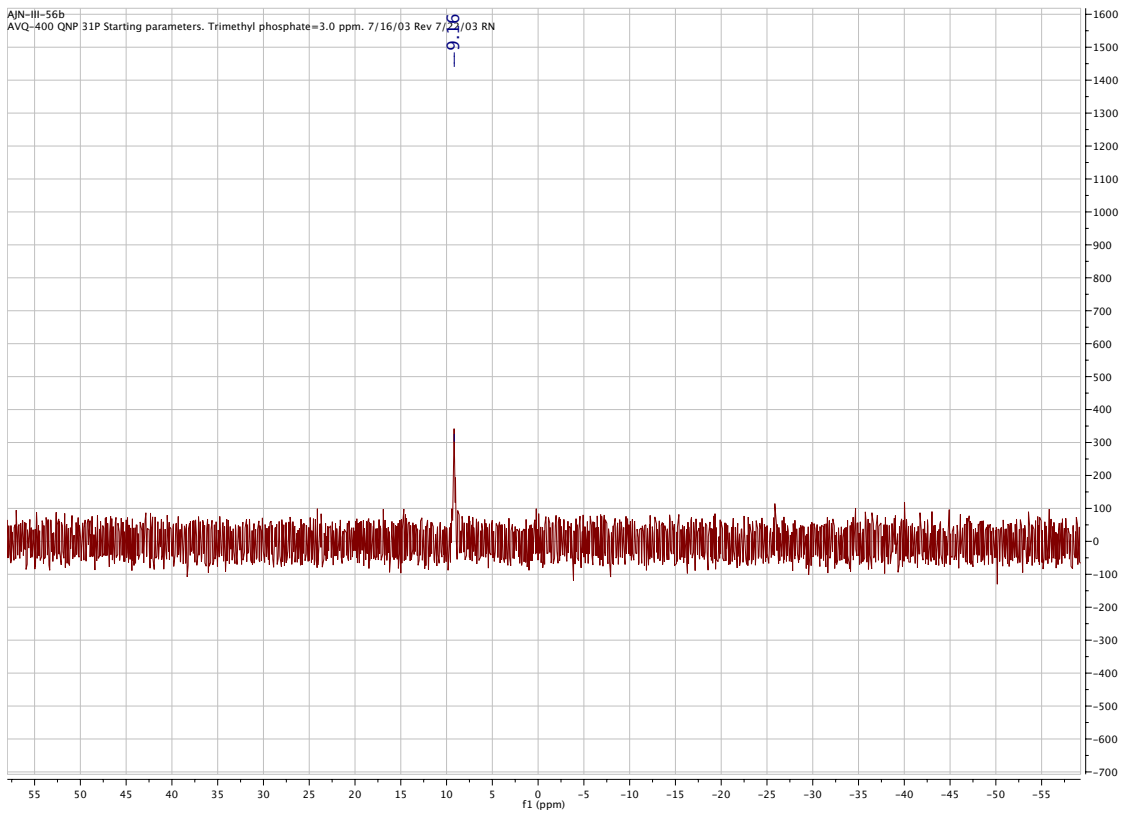

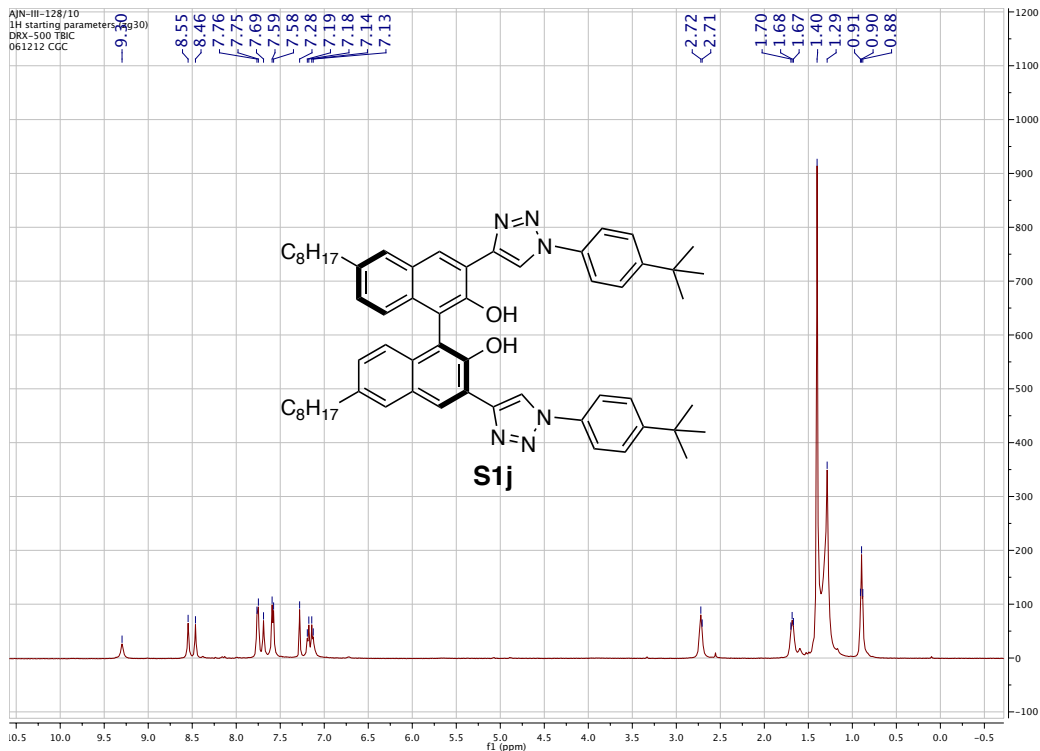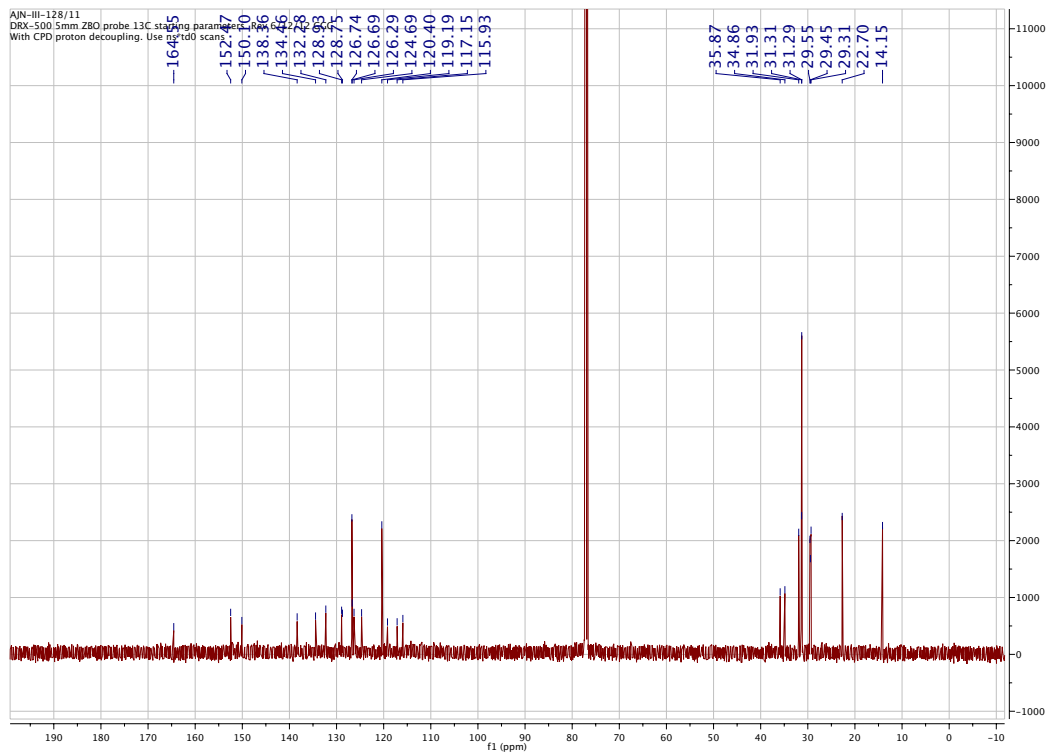



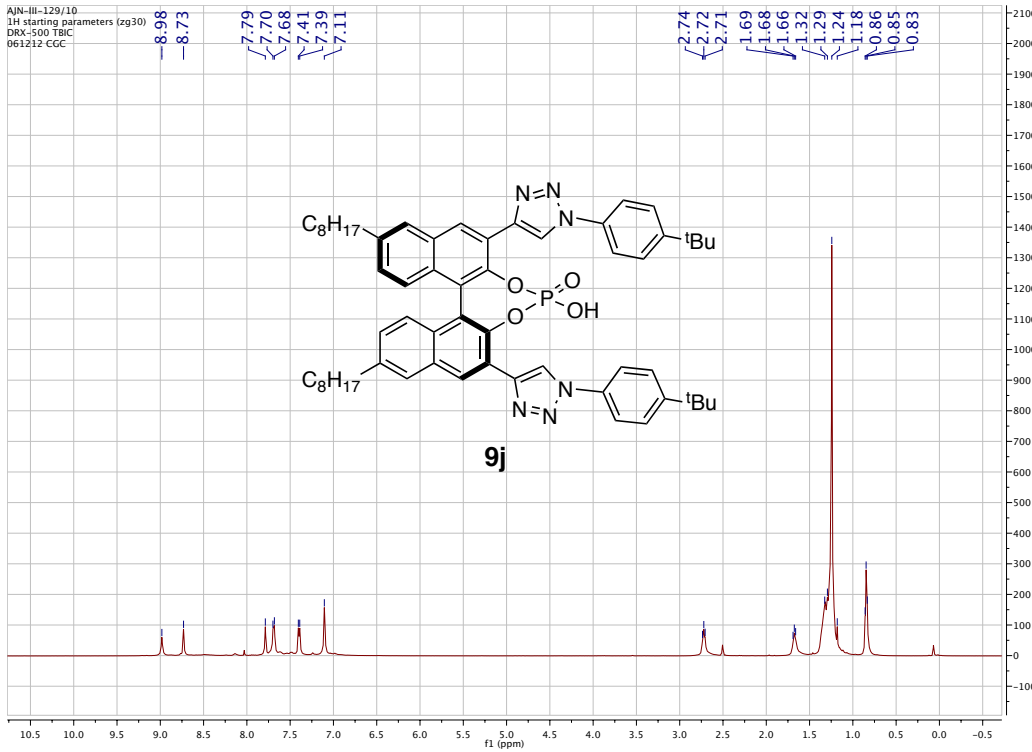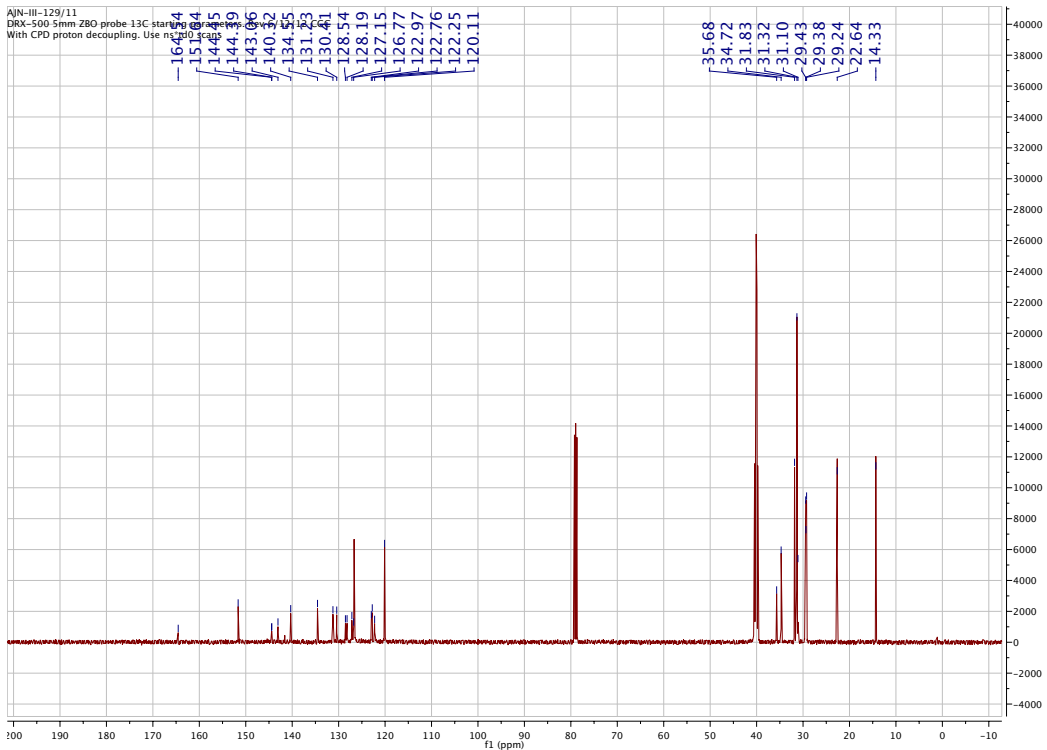

AN-III-129/12  
DIX-500 5mm ZBO probe 31P starting parameters  
Use ns'd0, PMeO3 set to 1.67 ppm  
6/12/12 CC revised

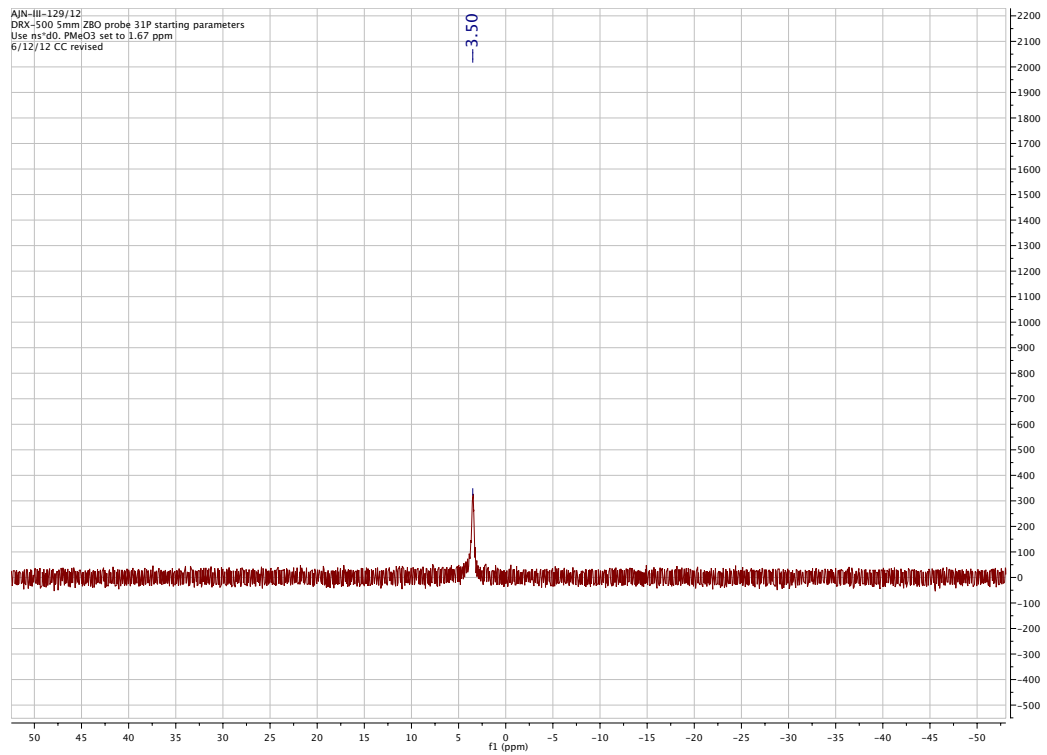

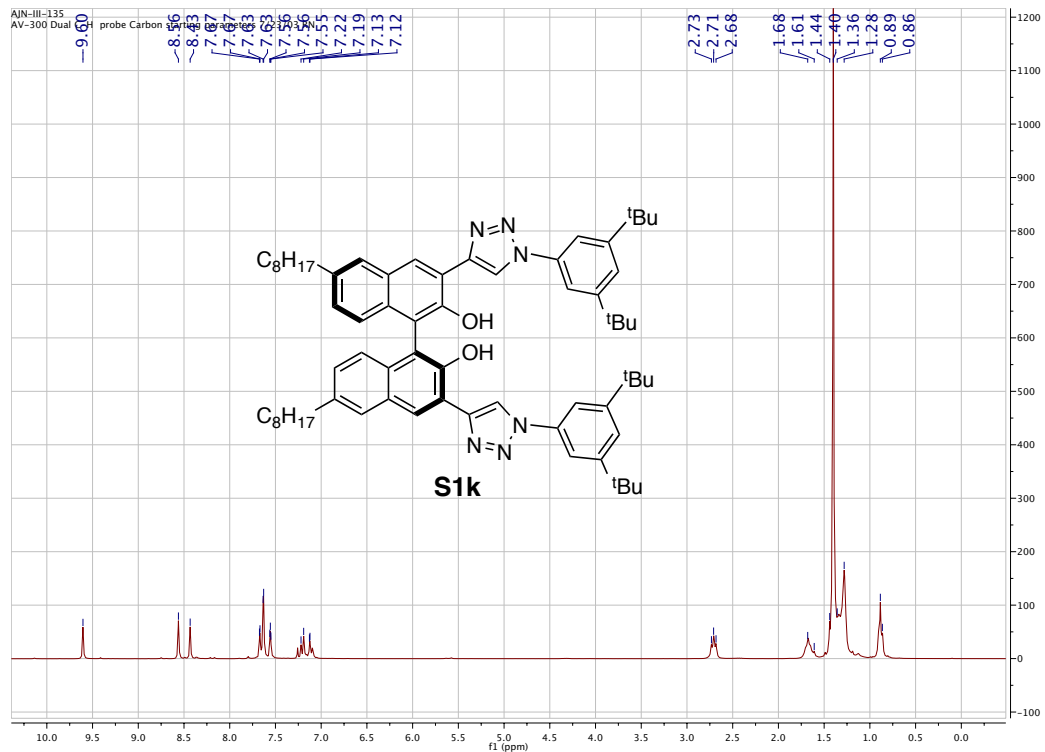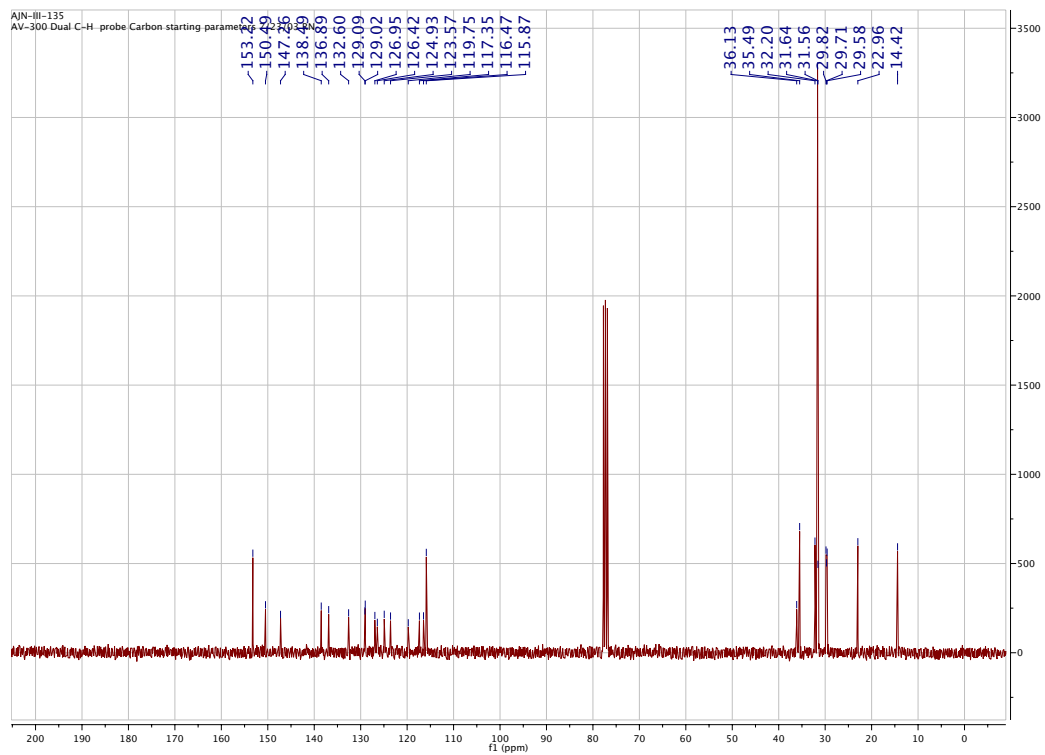

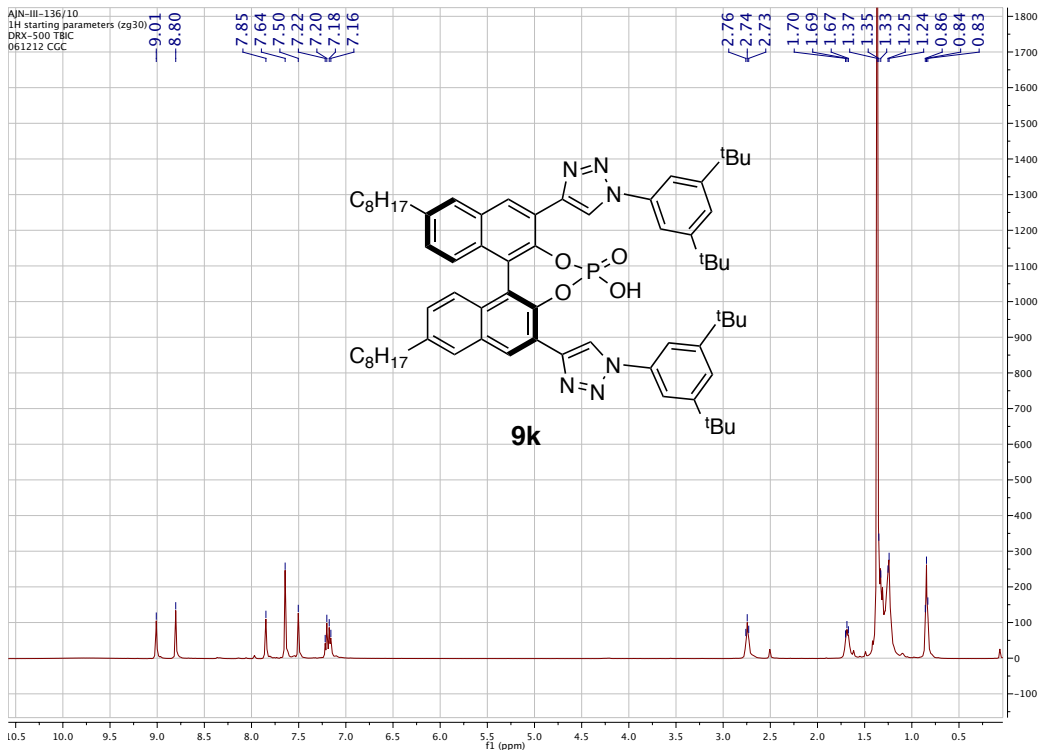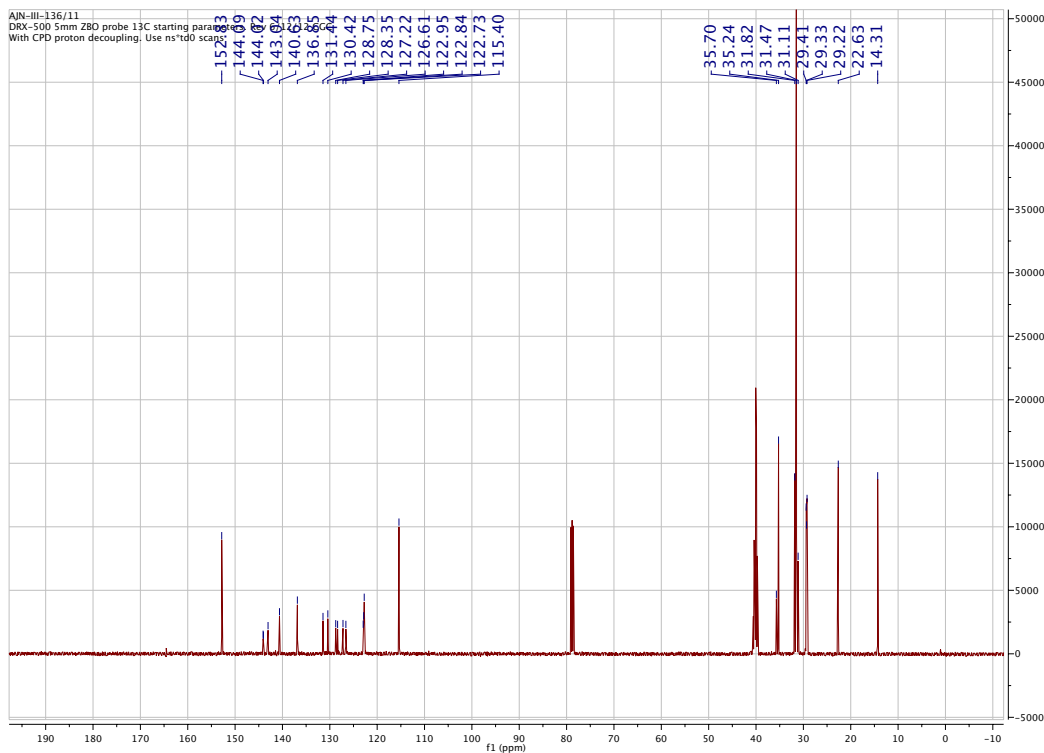

AIN-III-136/12  
DRX-500 5mm ZBO probe 13C starting parameters. Rev 6/12/12 CGC  
With CPD proton decoupling. Use ns\*td0 scans

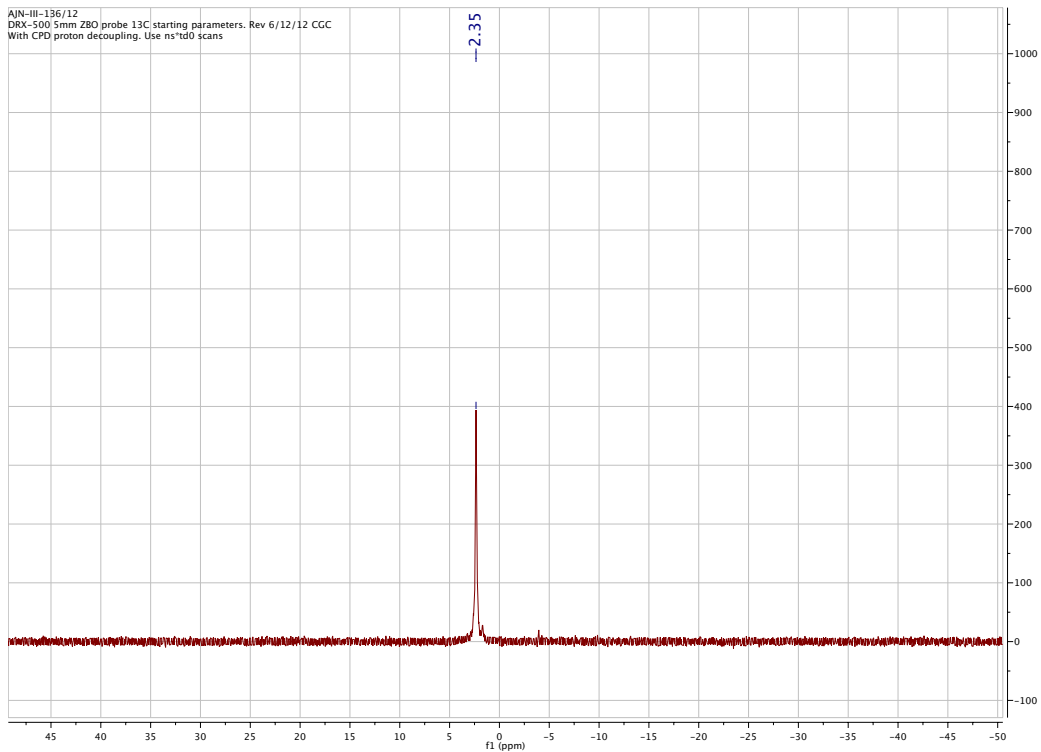

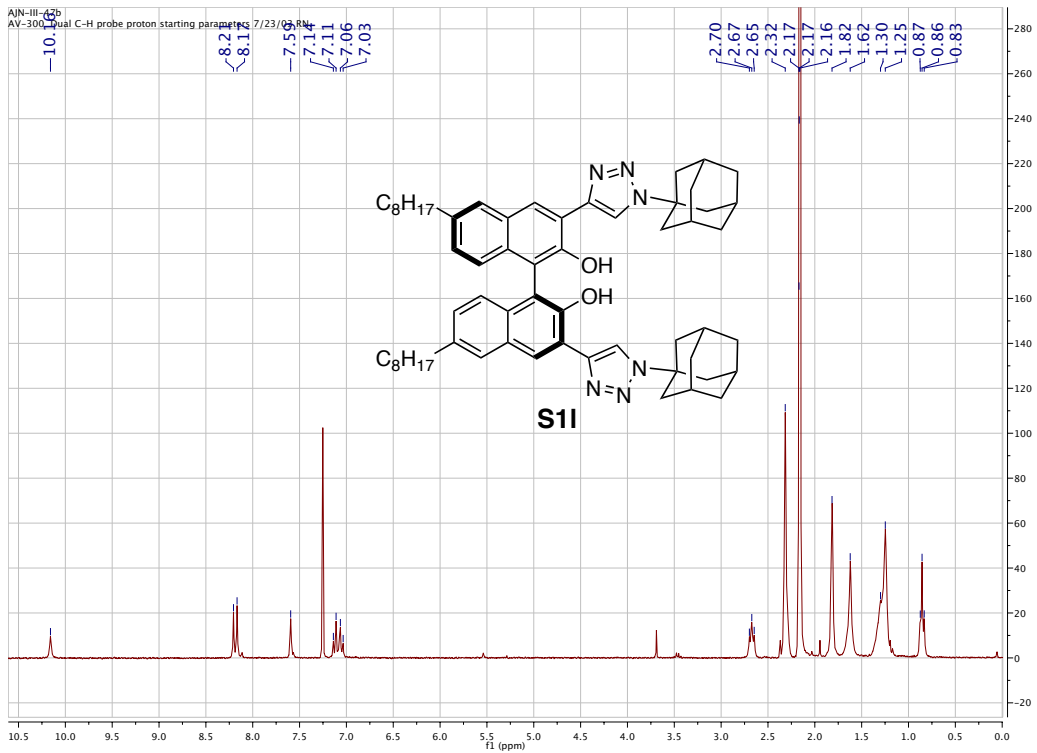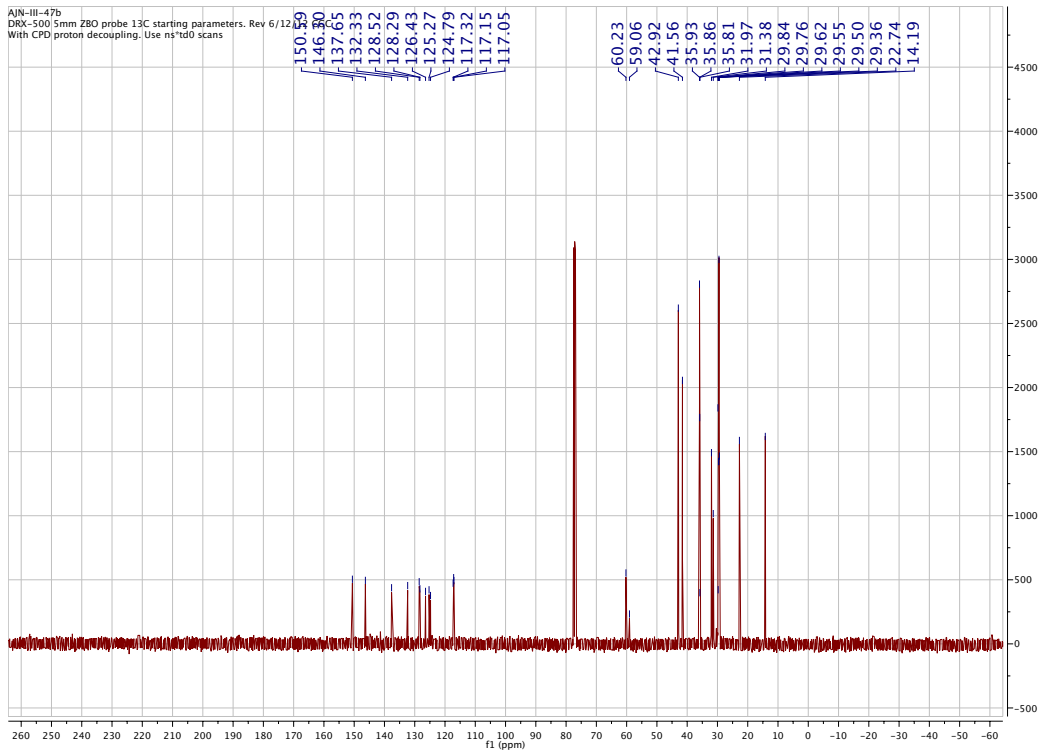

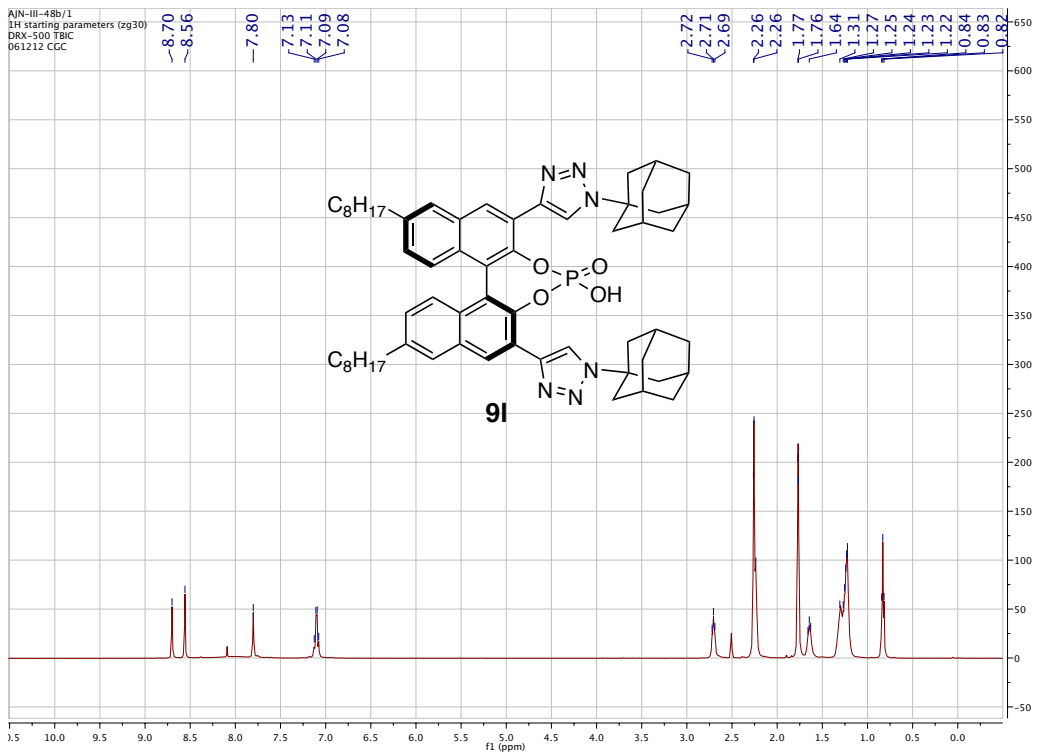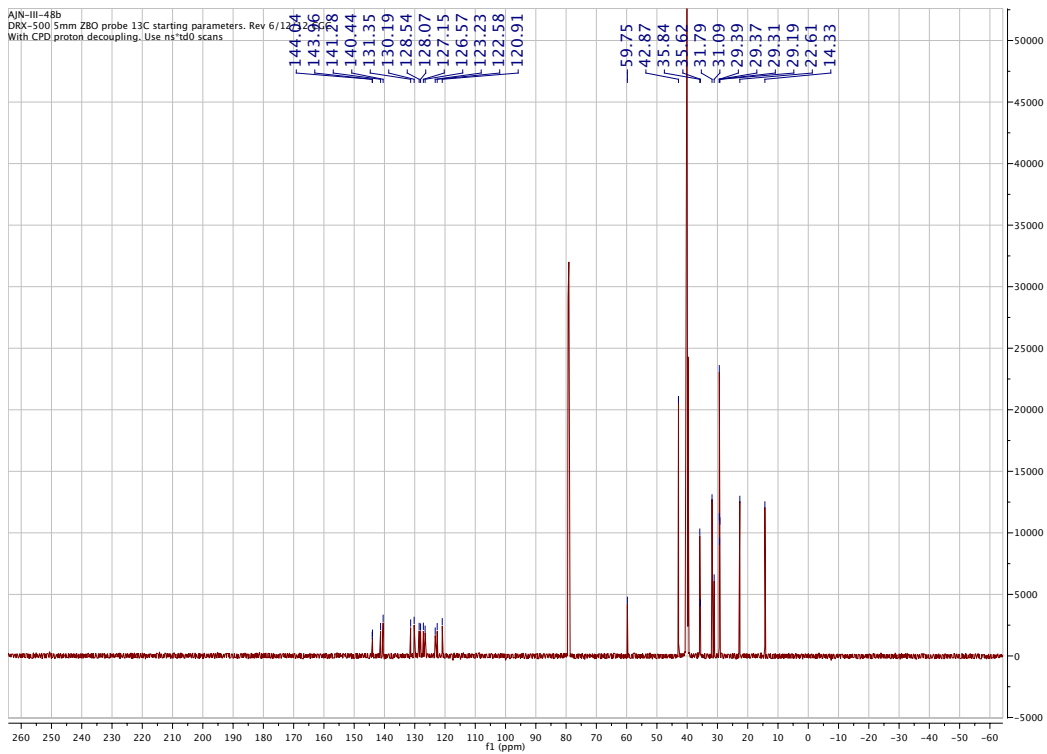

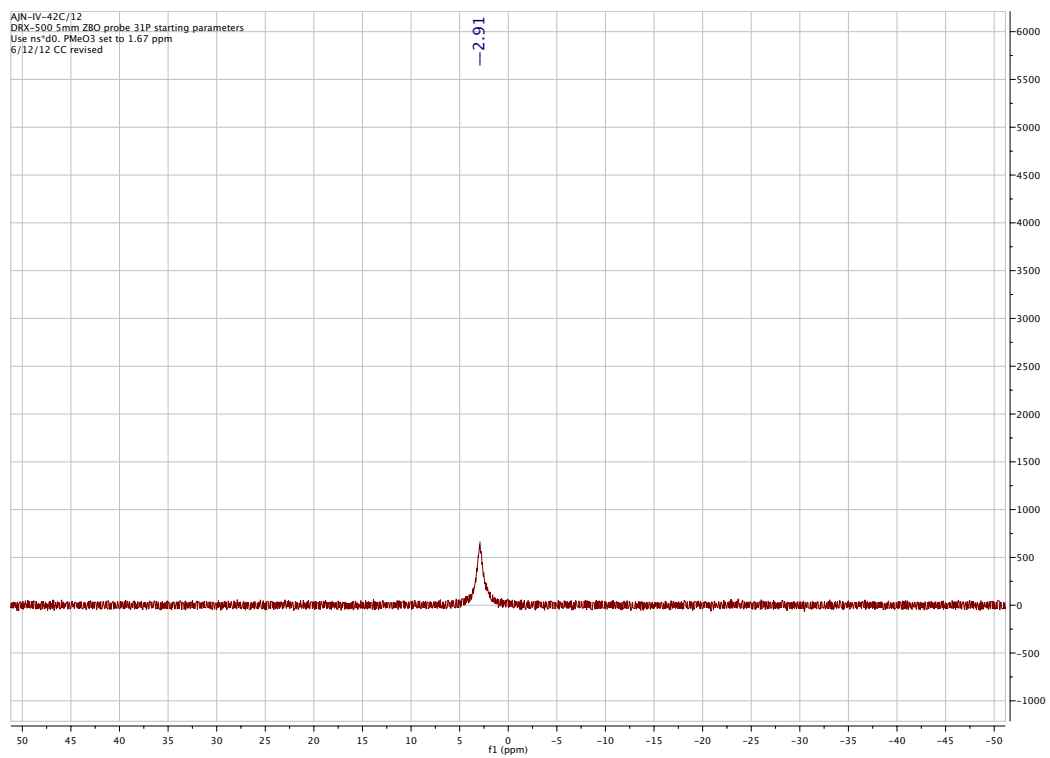



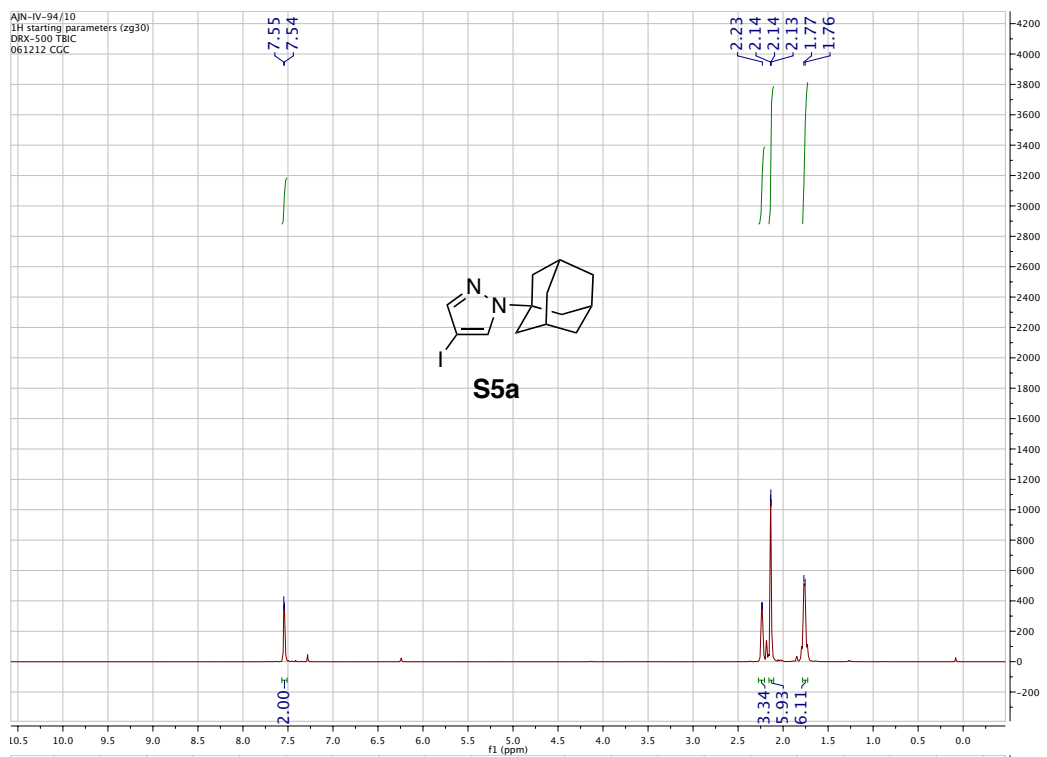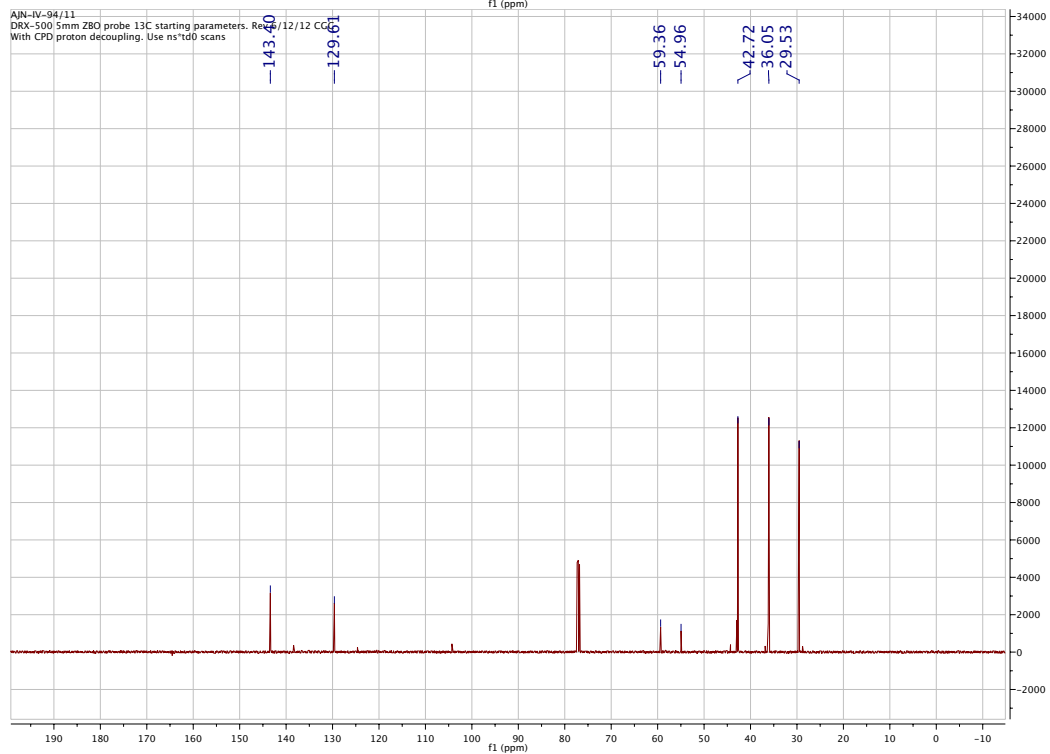

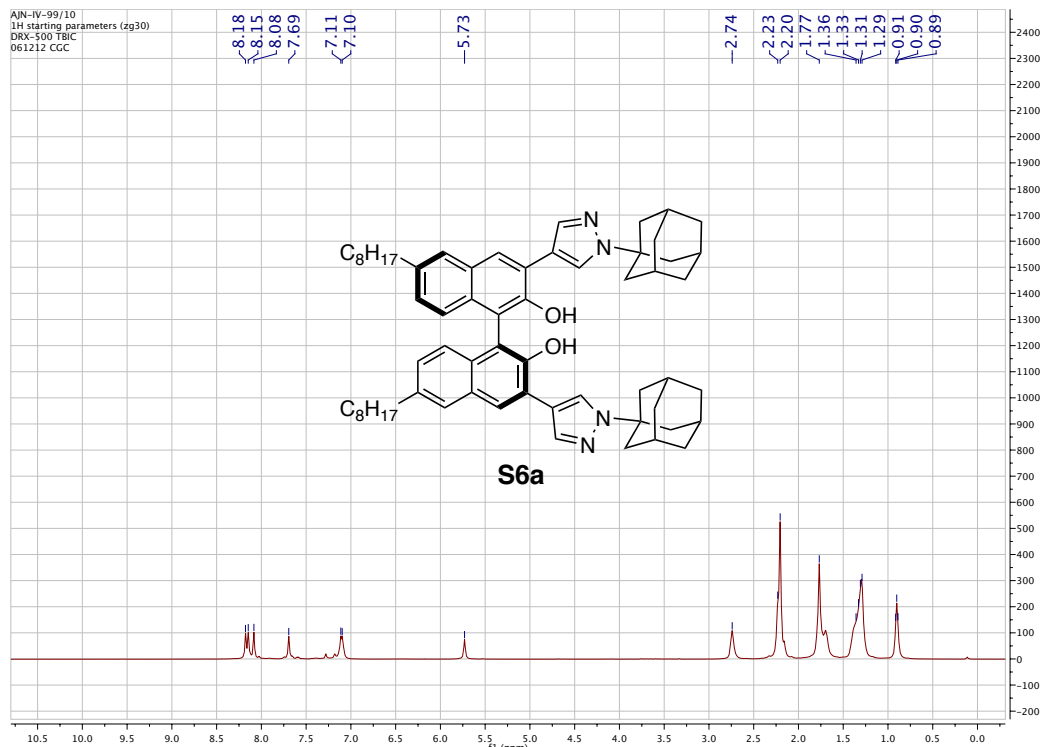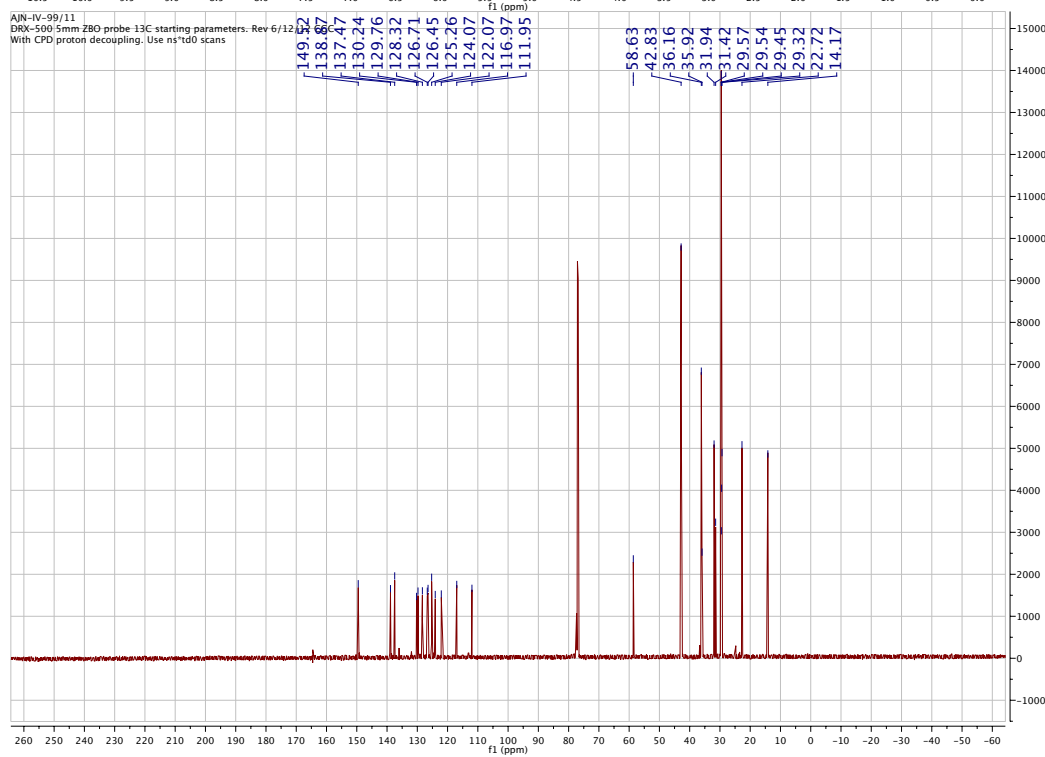

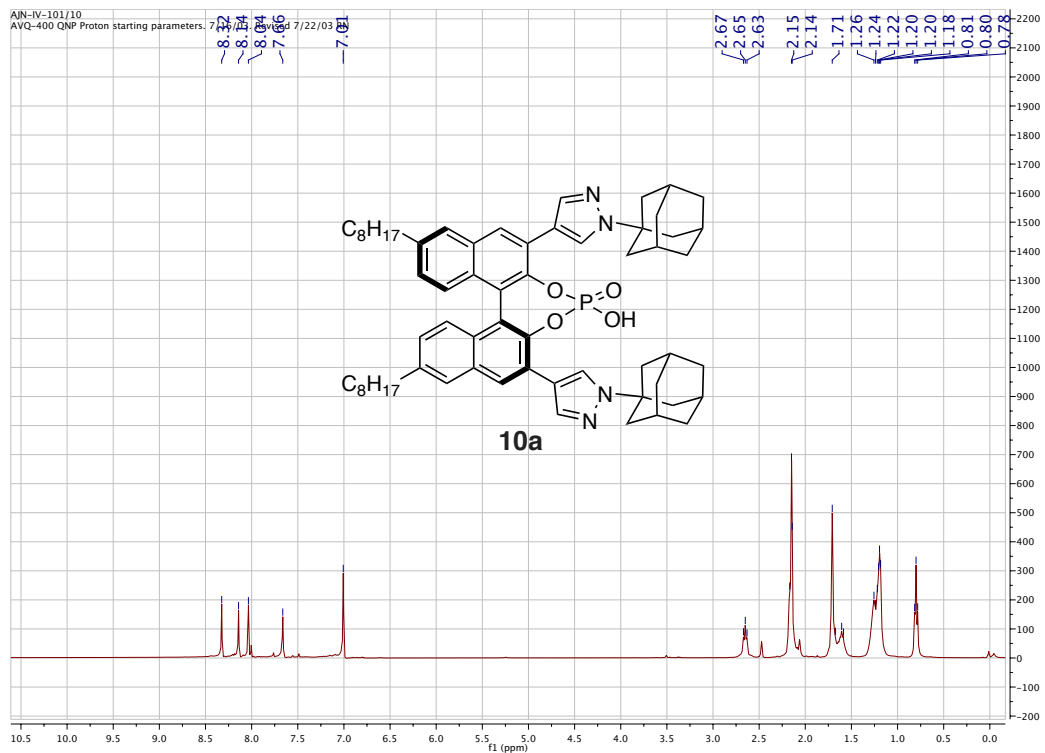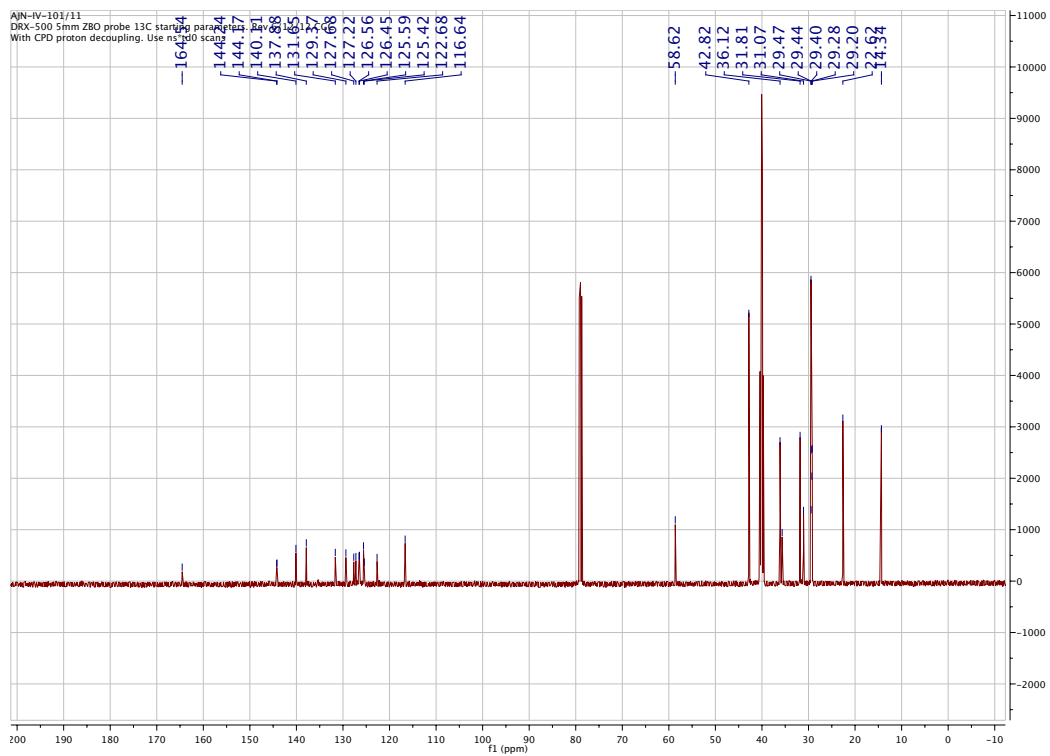

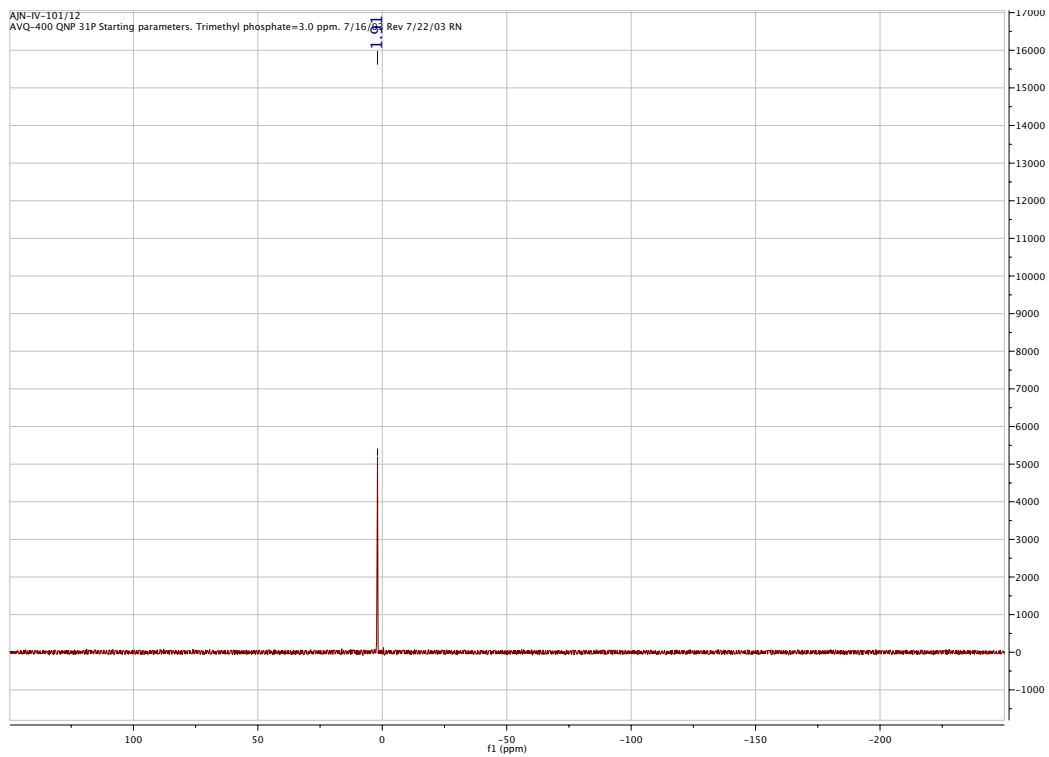

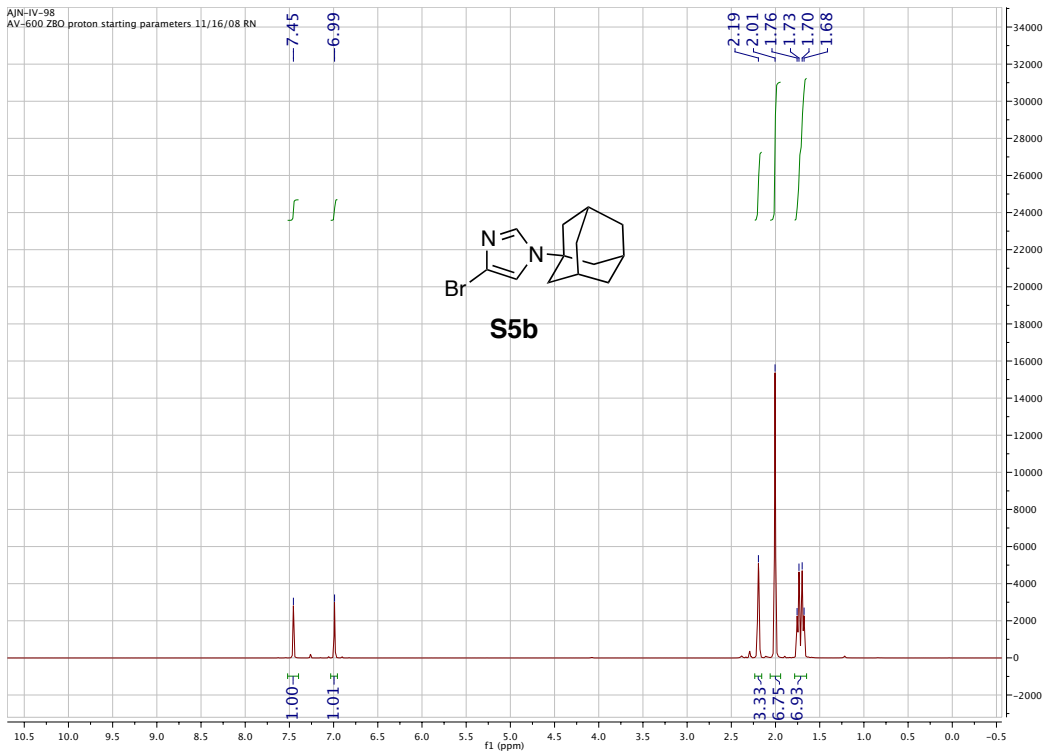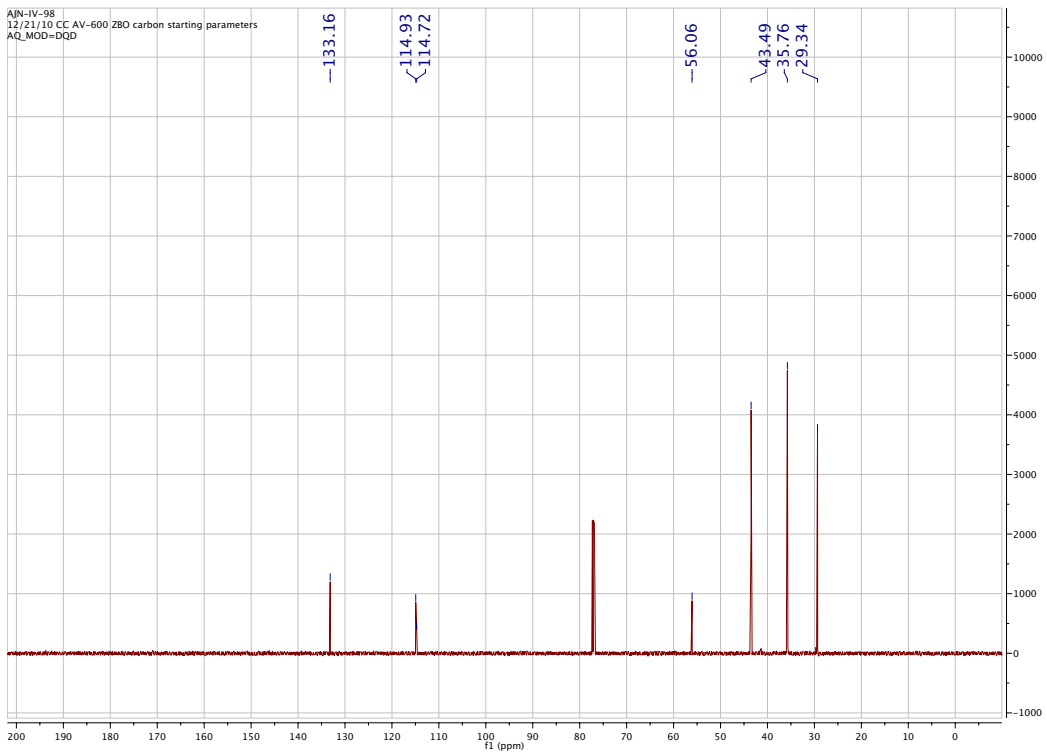

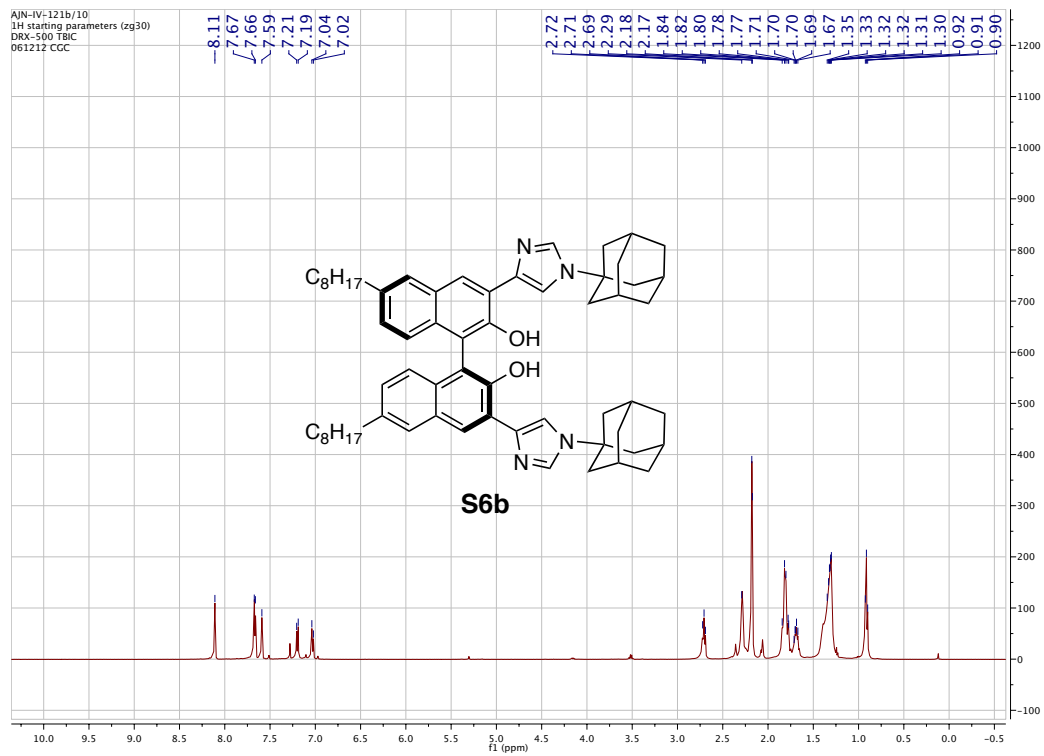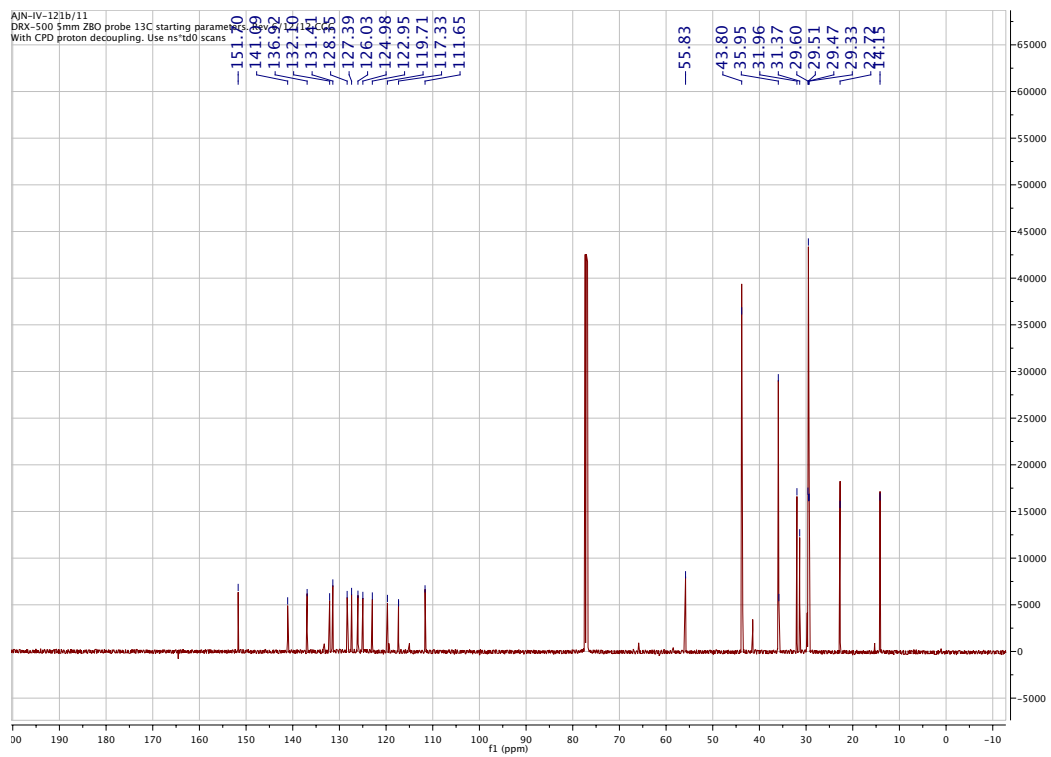

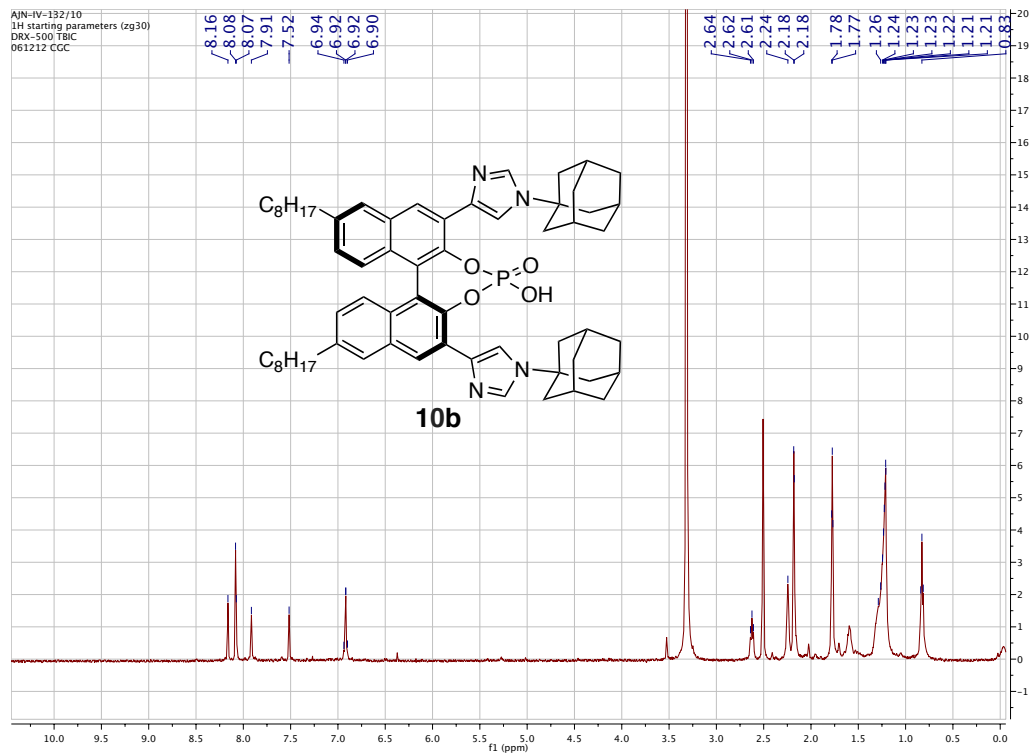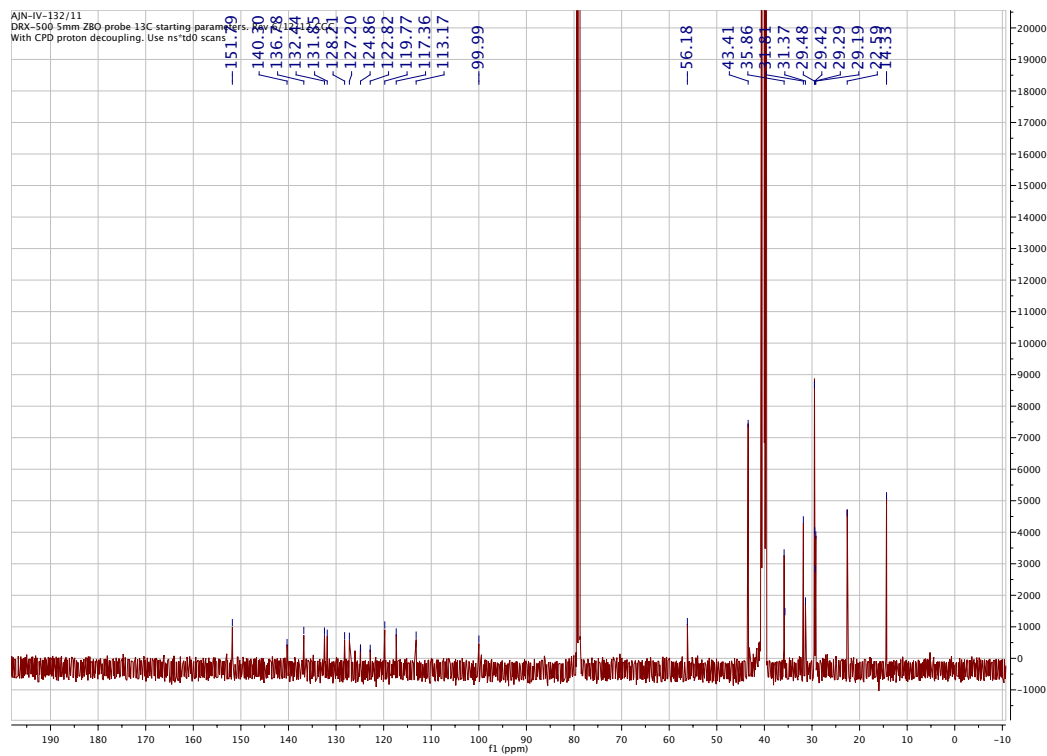

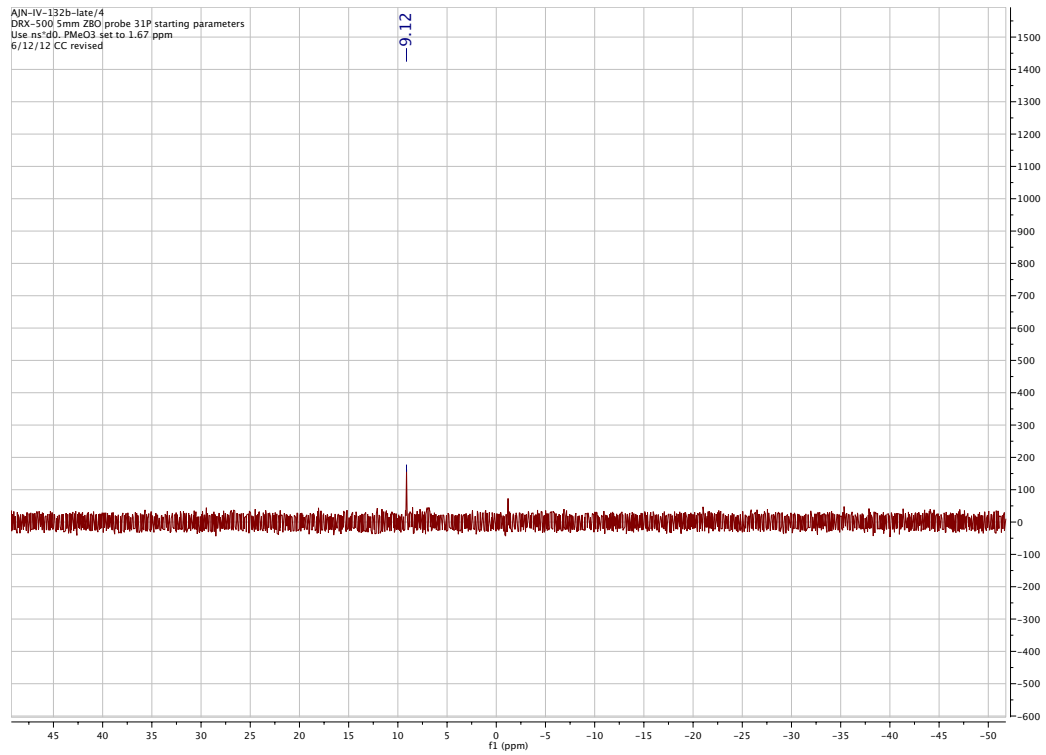



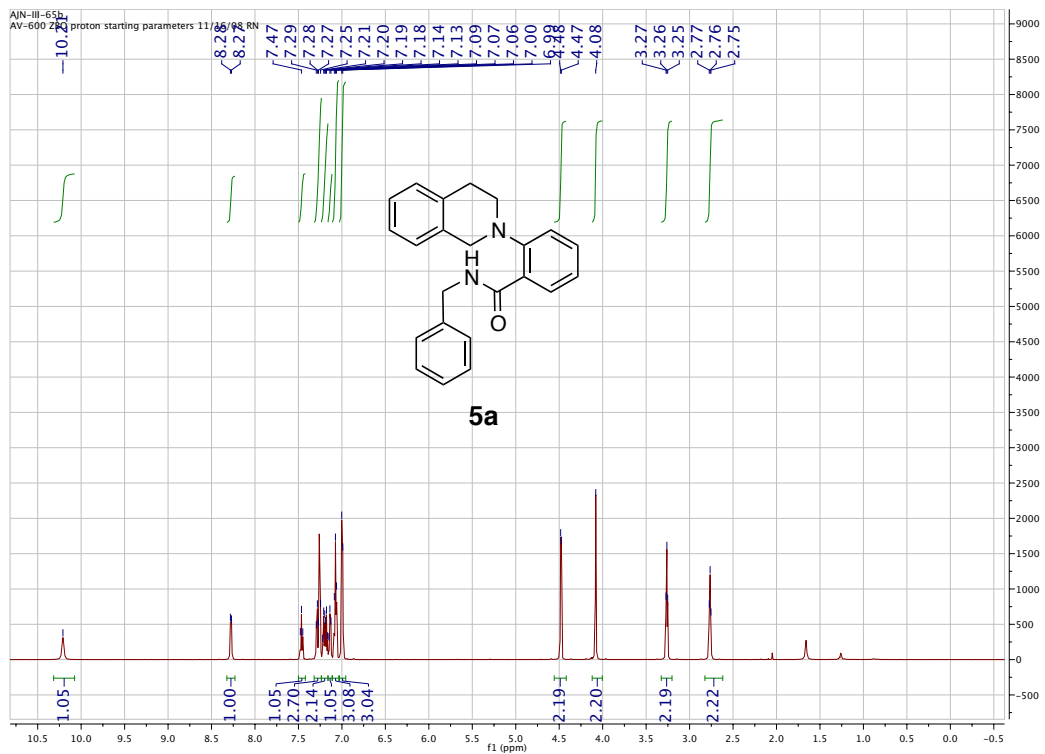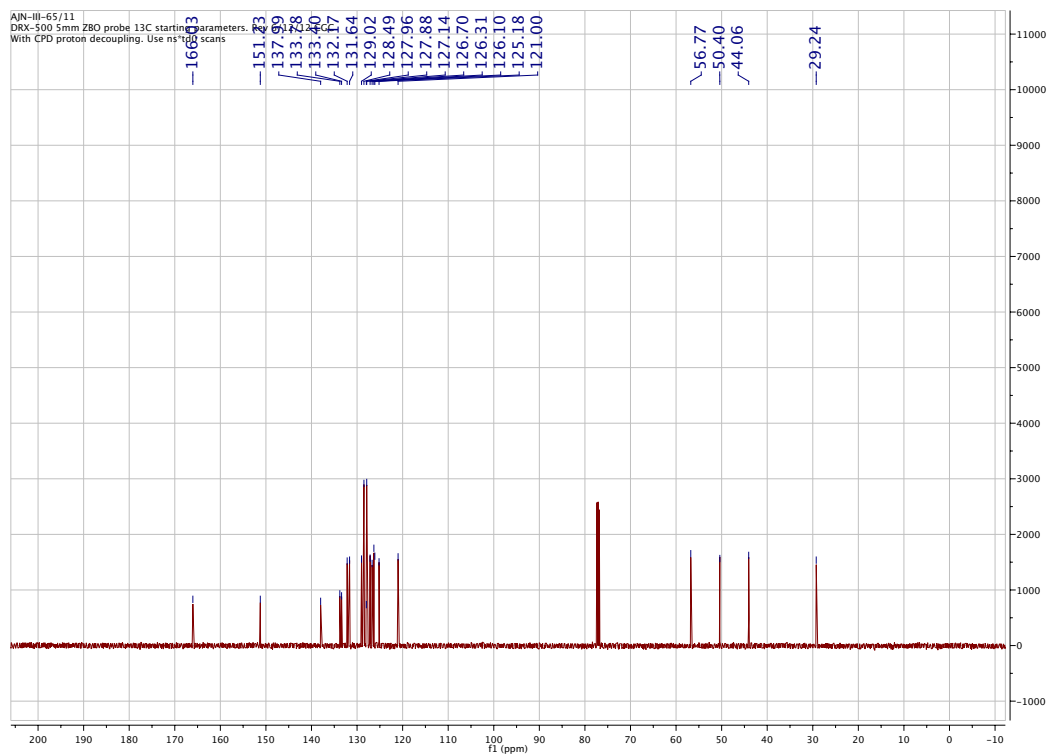

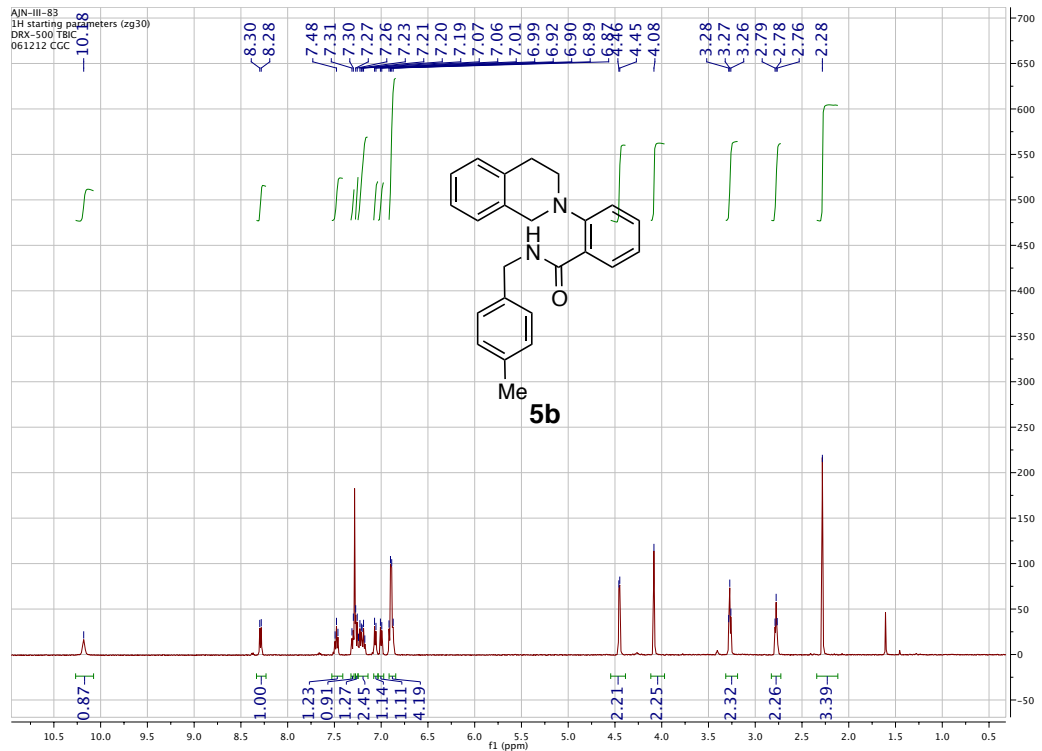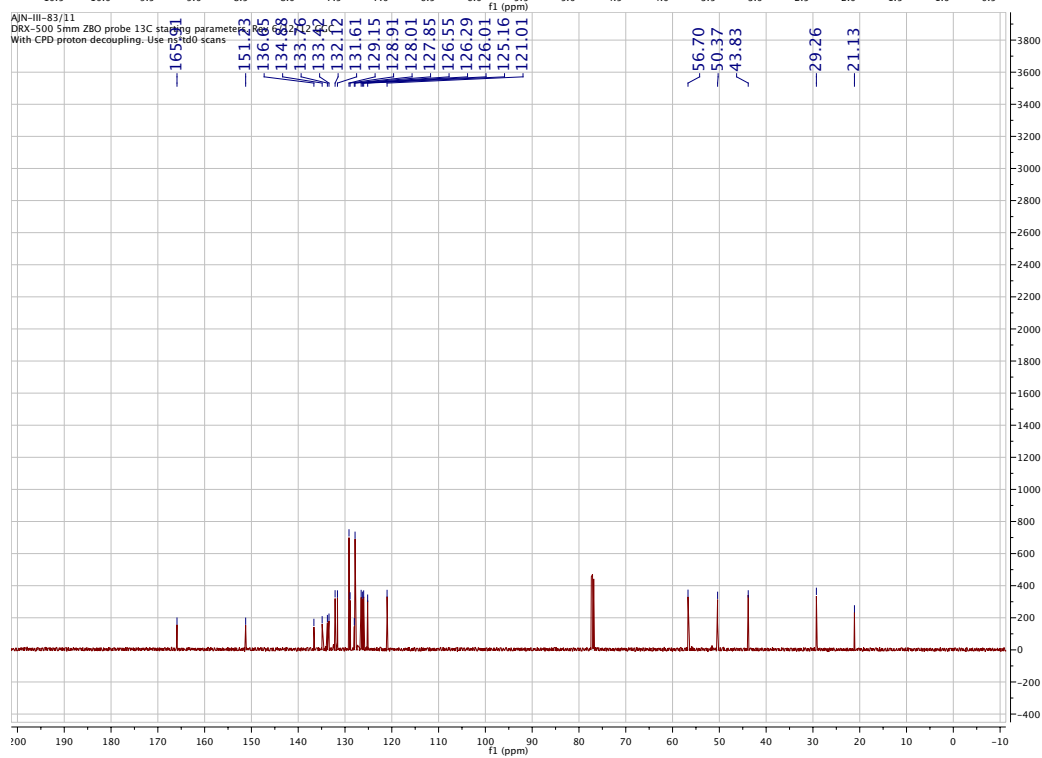

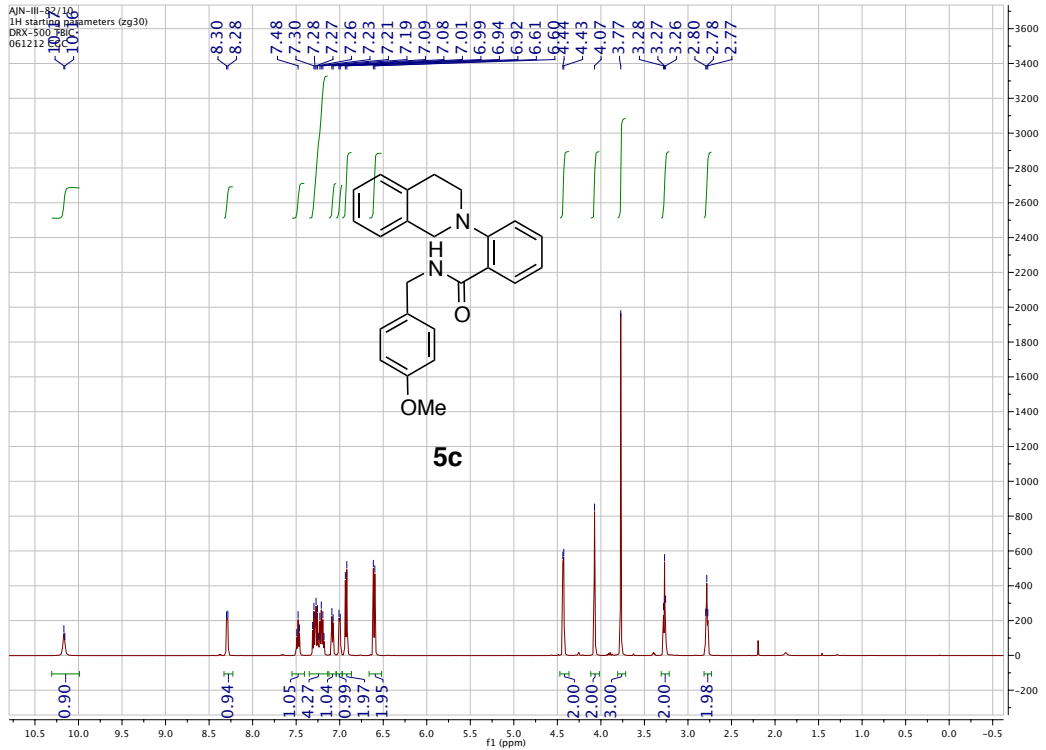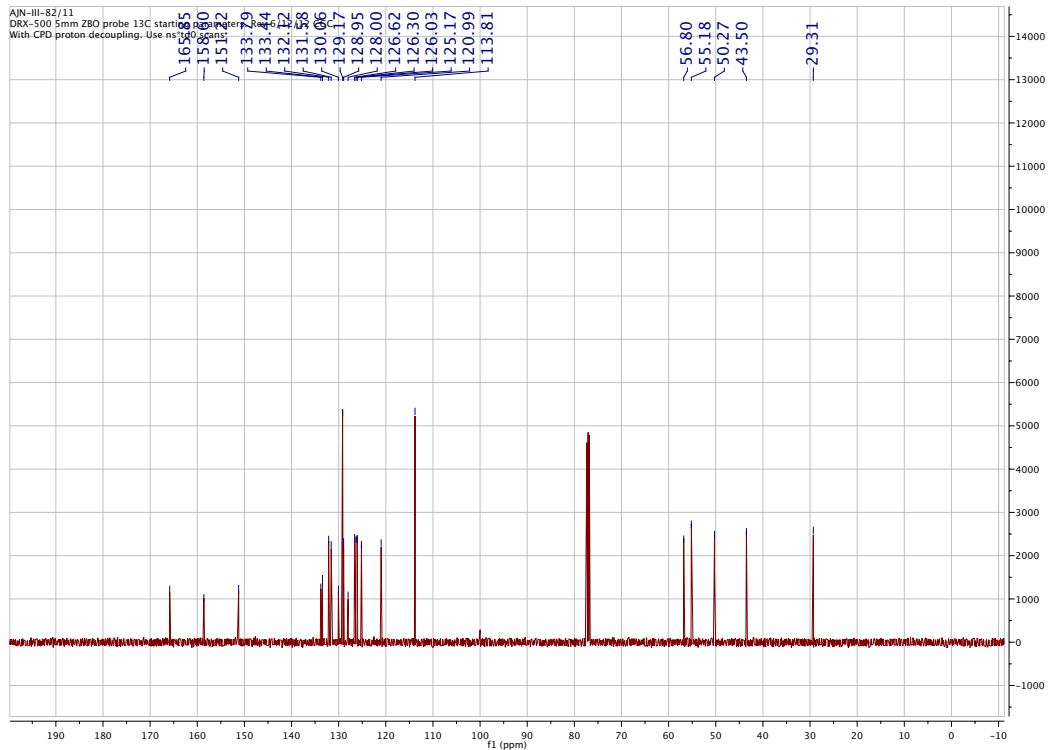

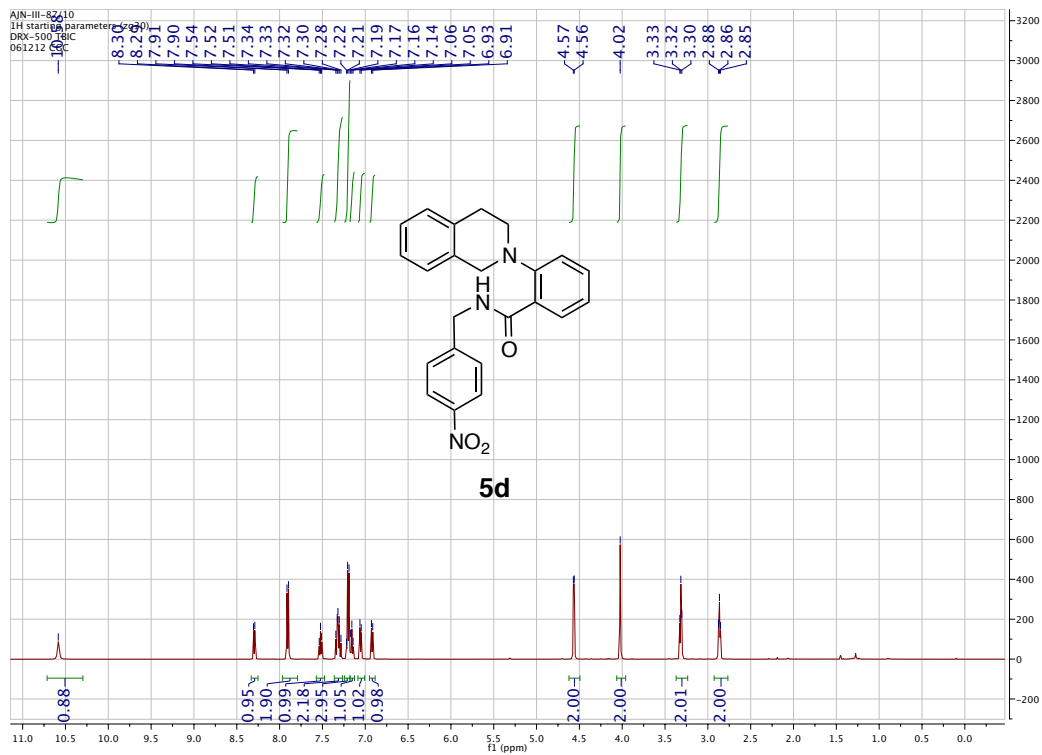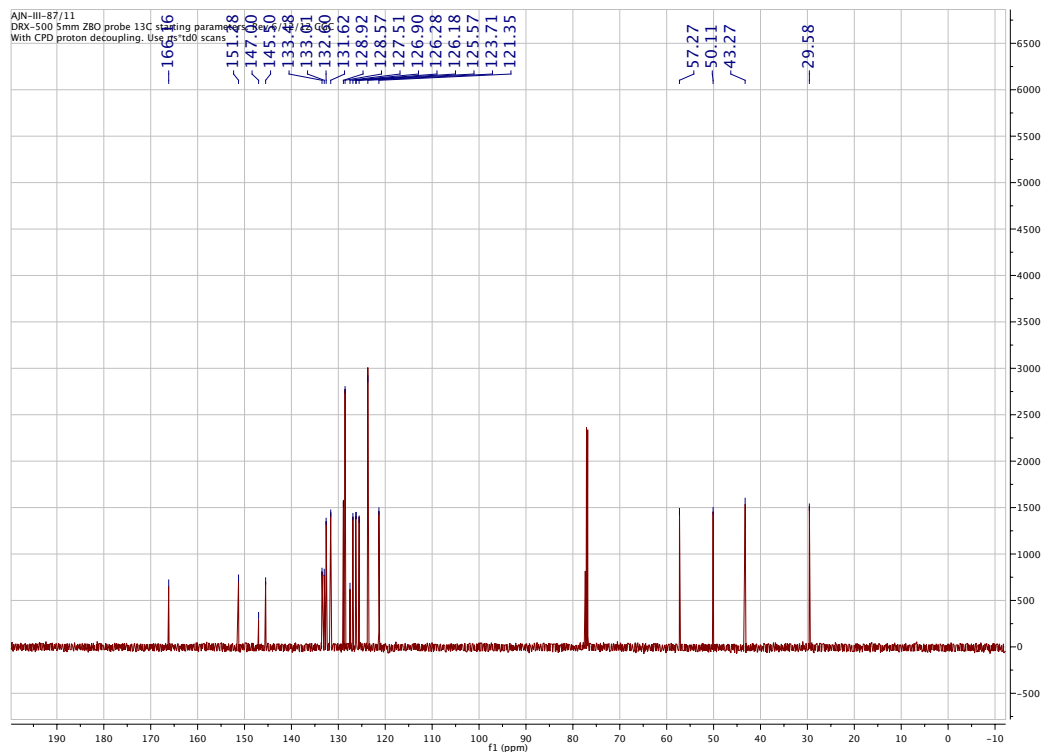

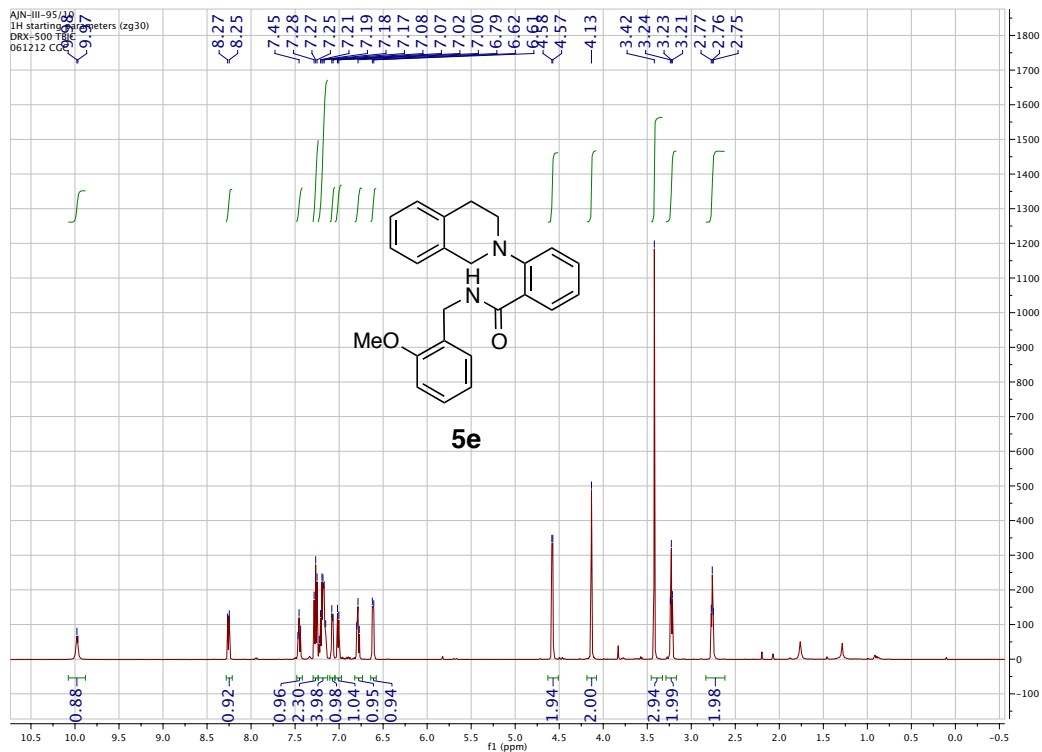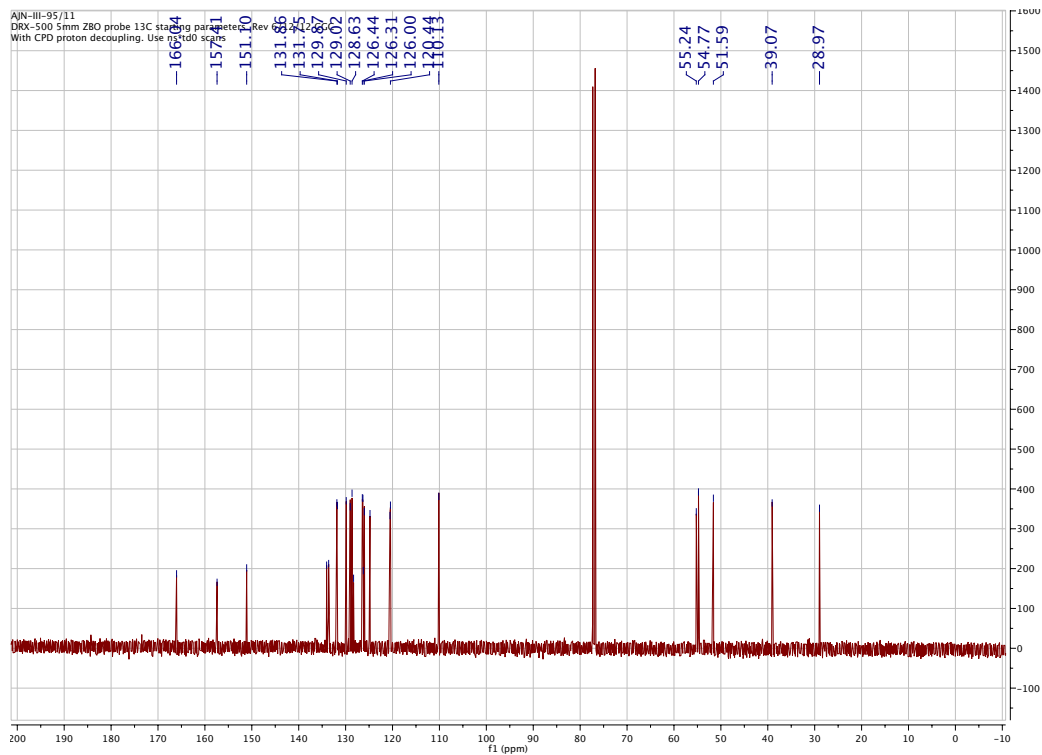

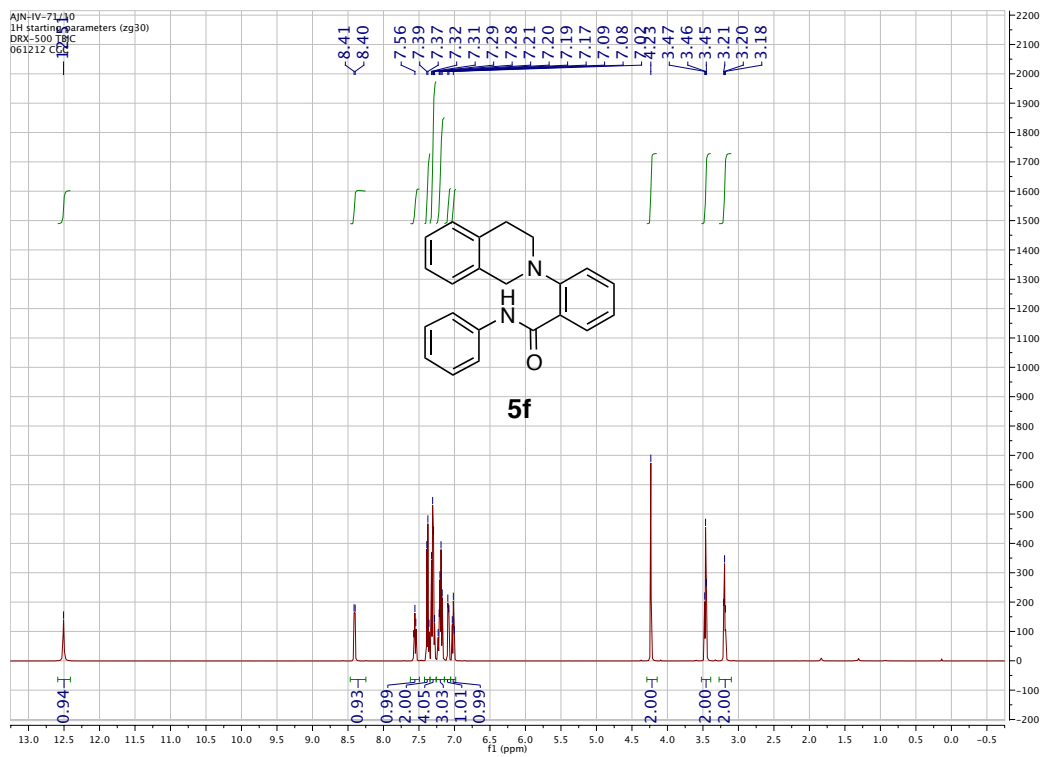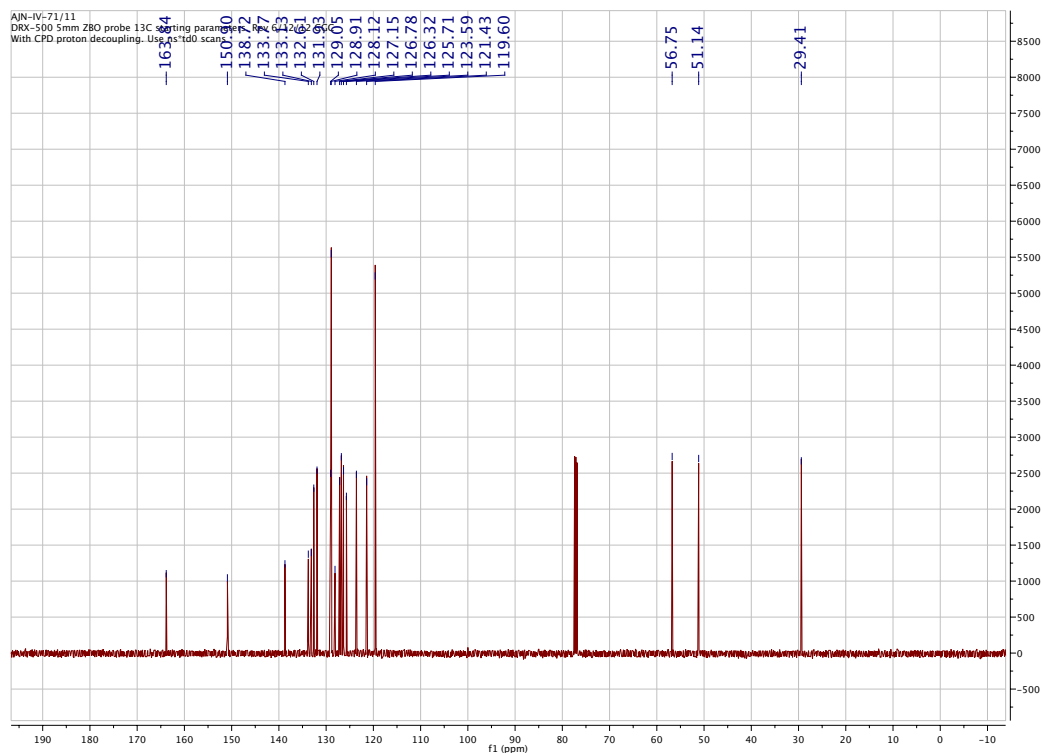

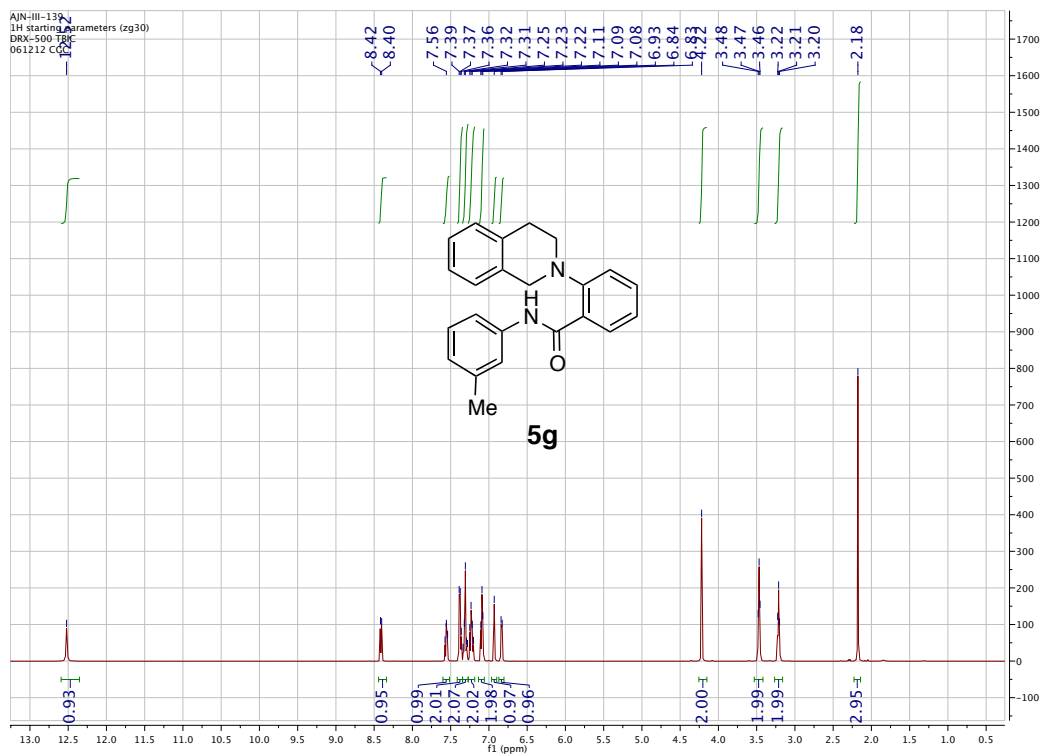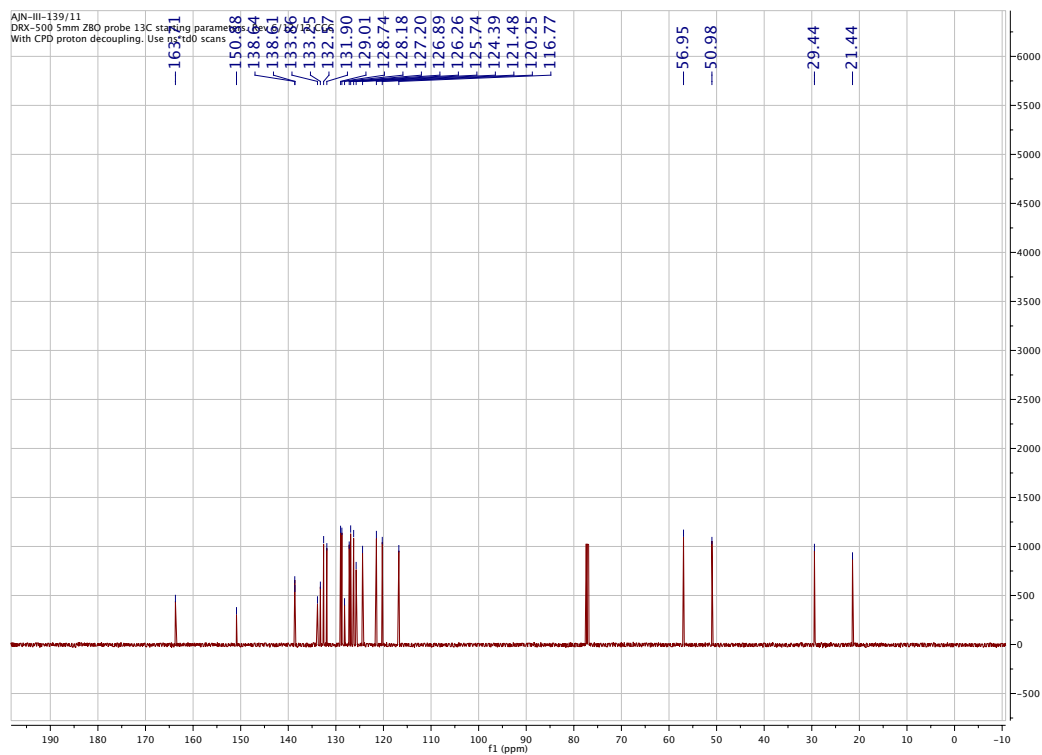

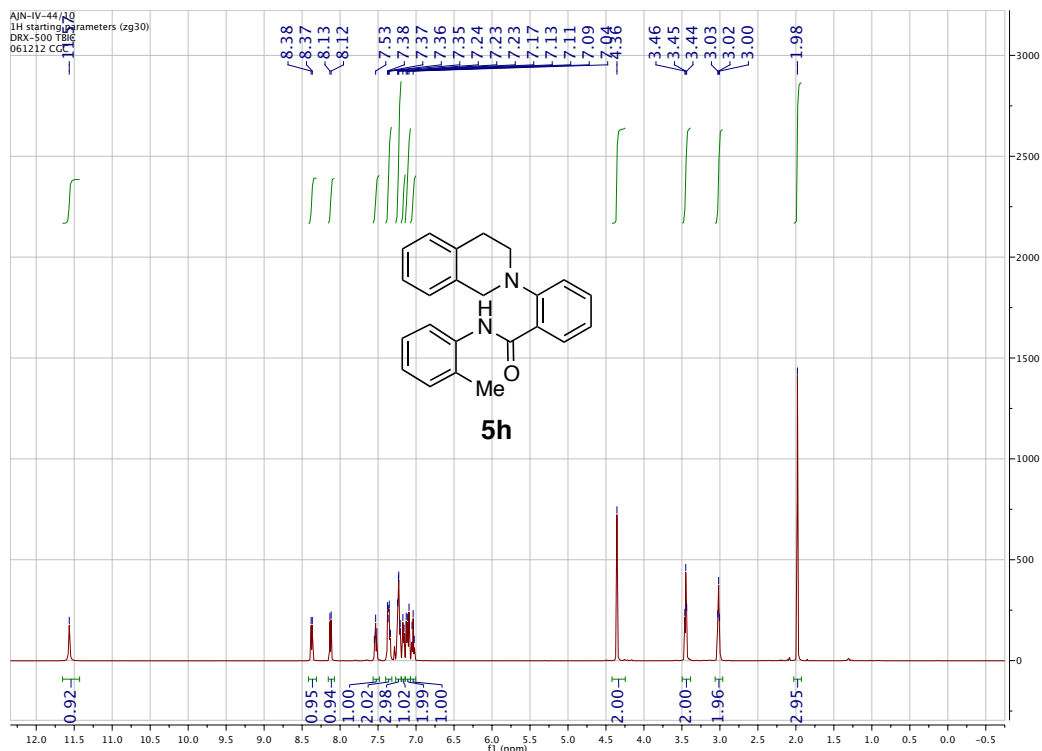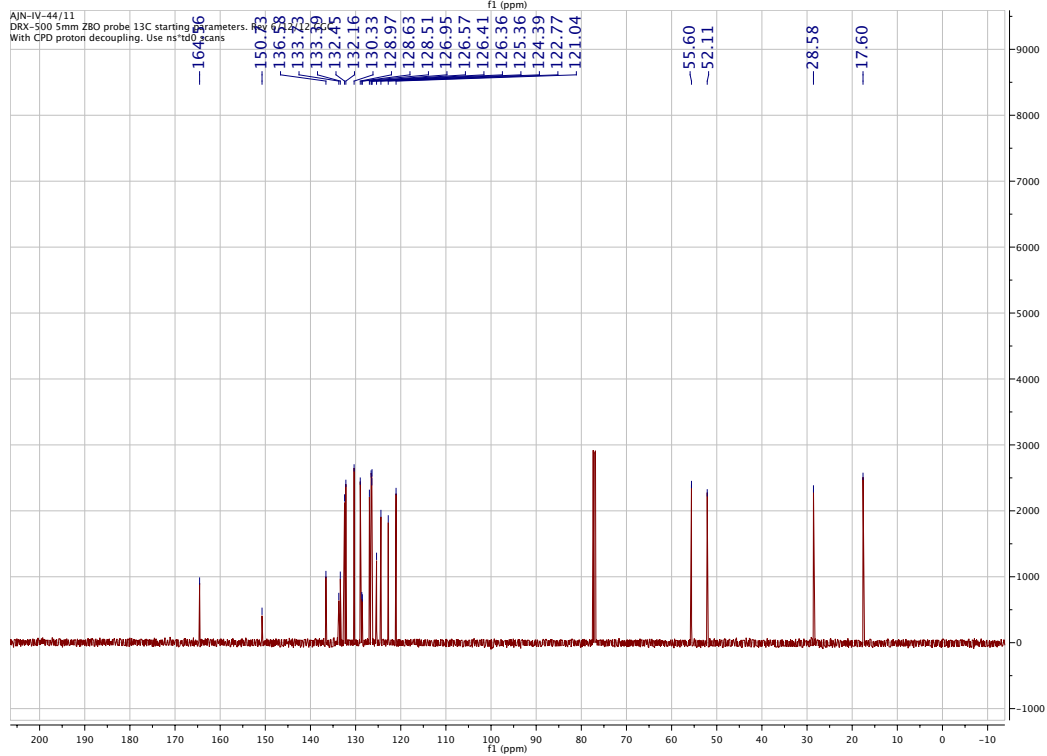



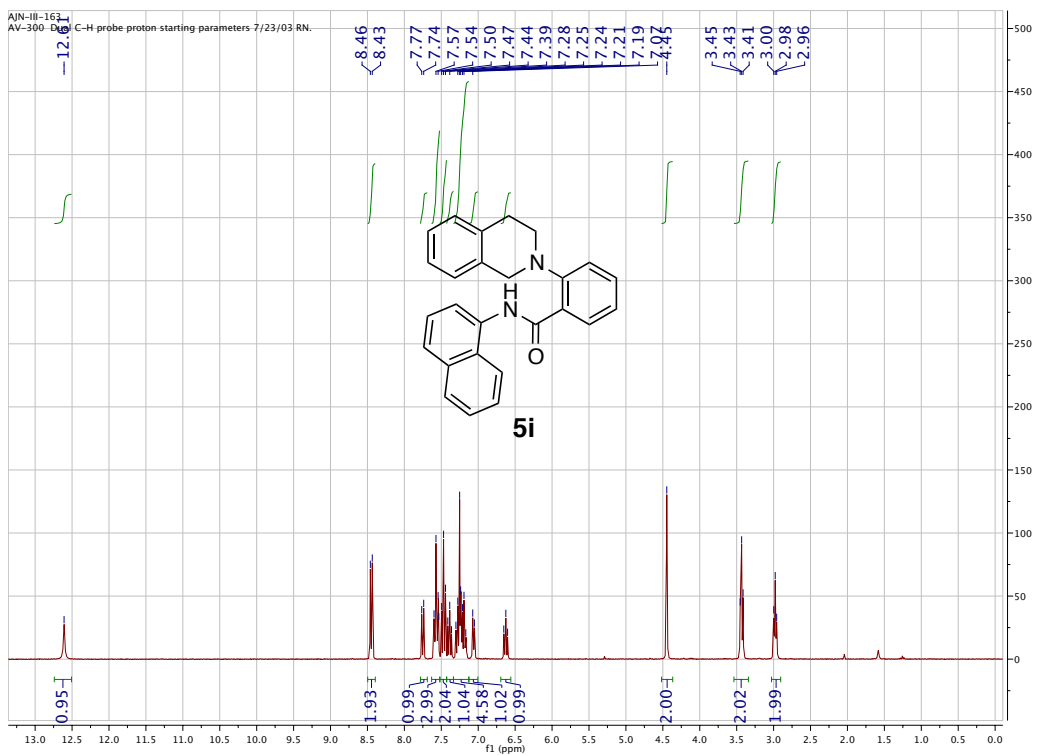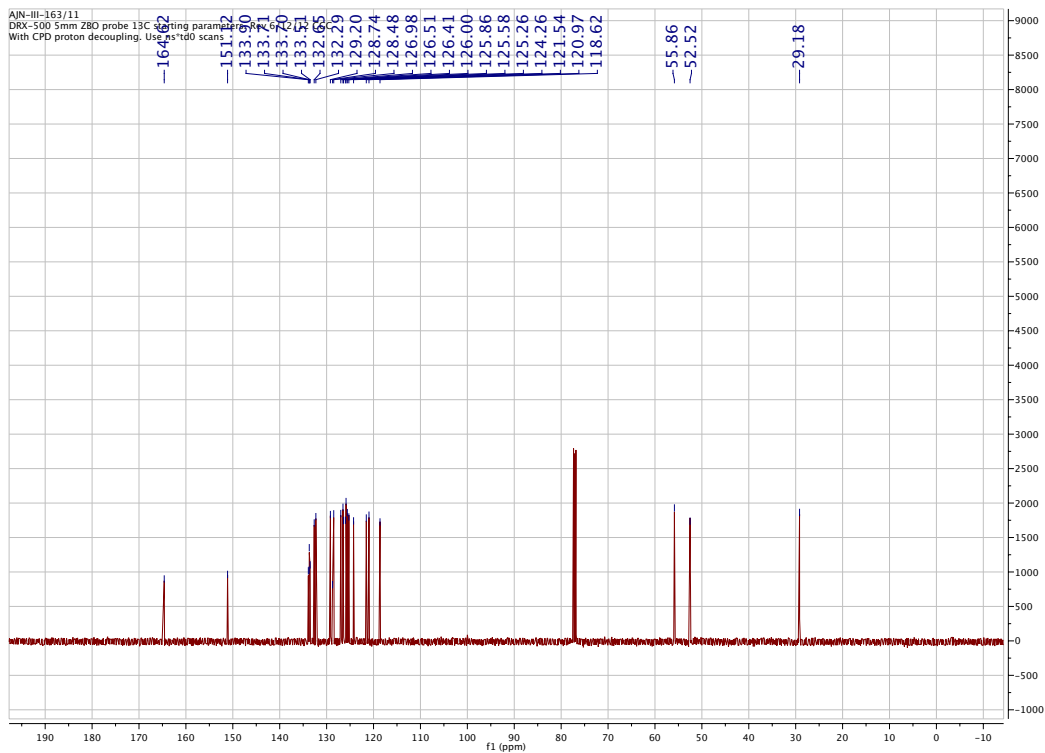

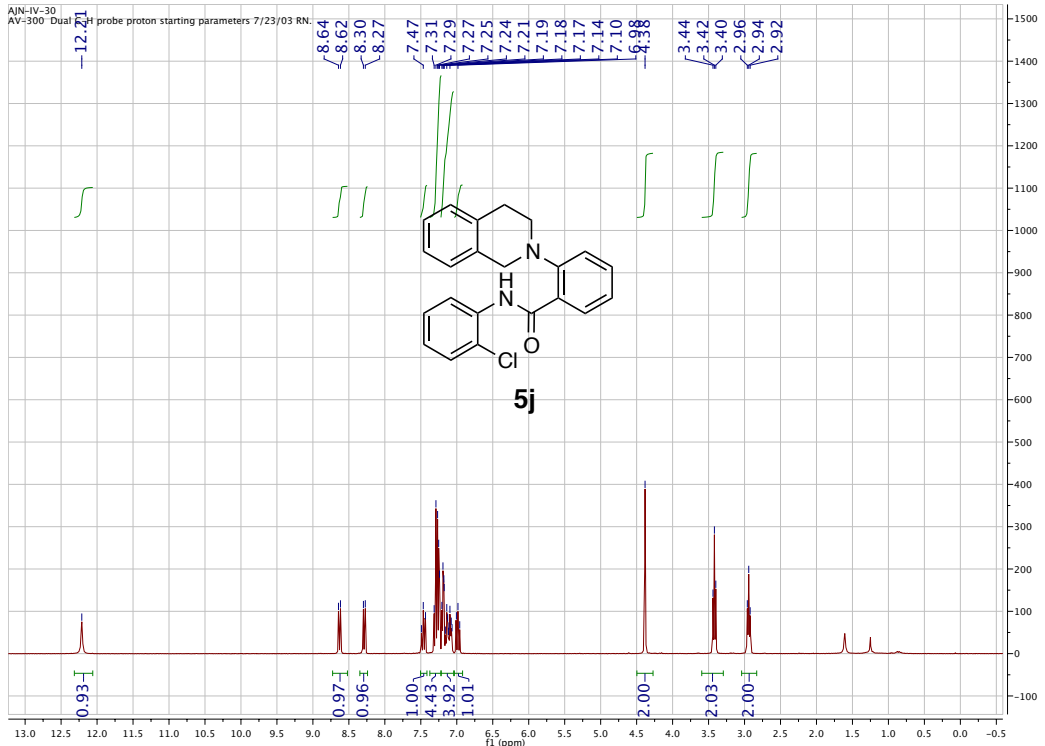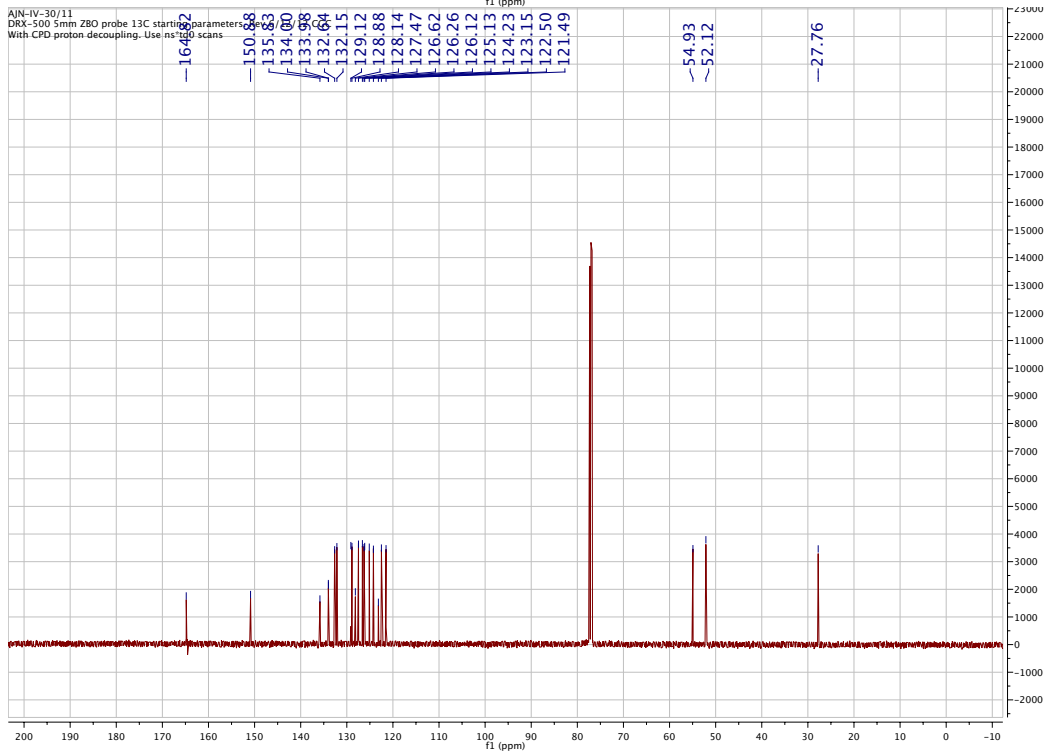

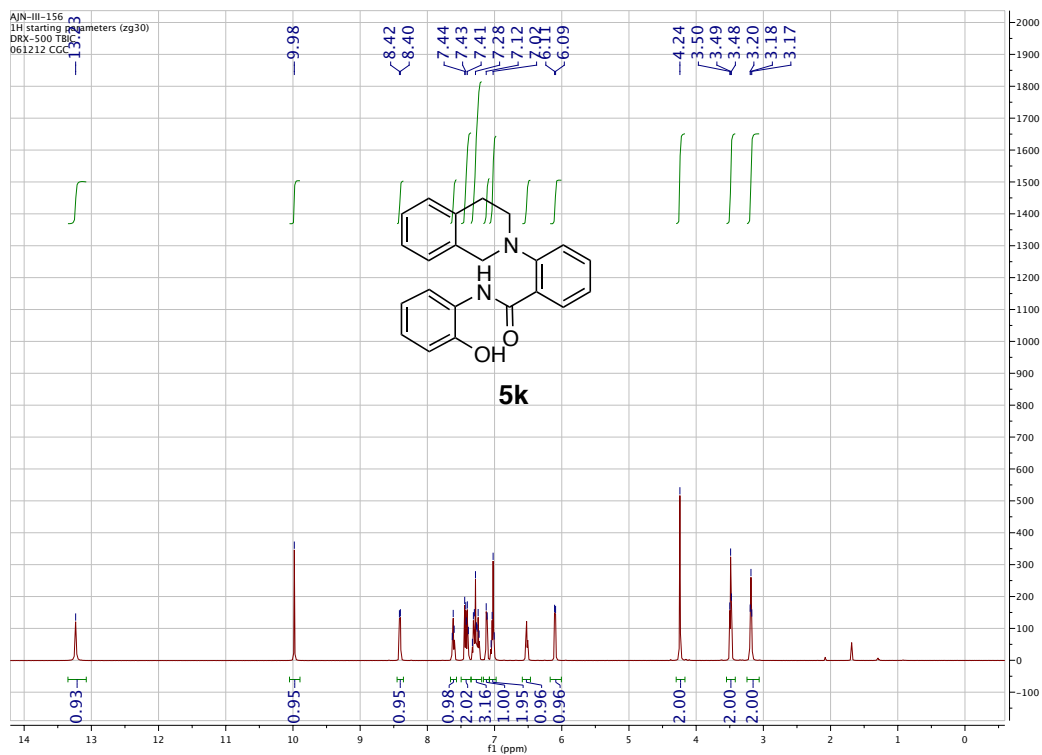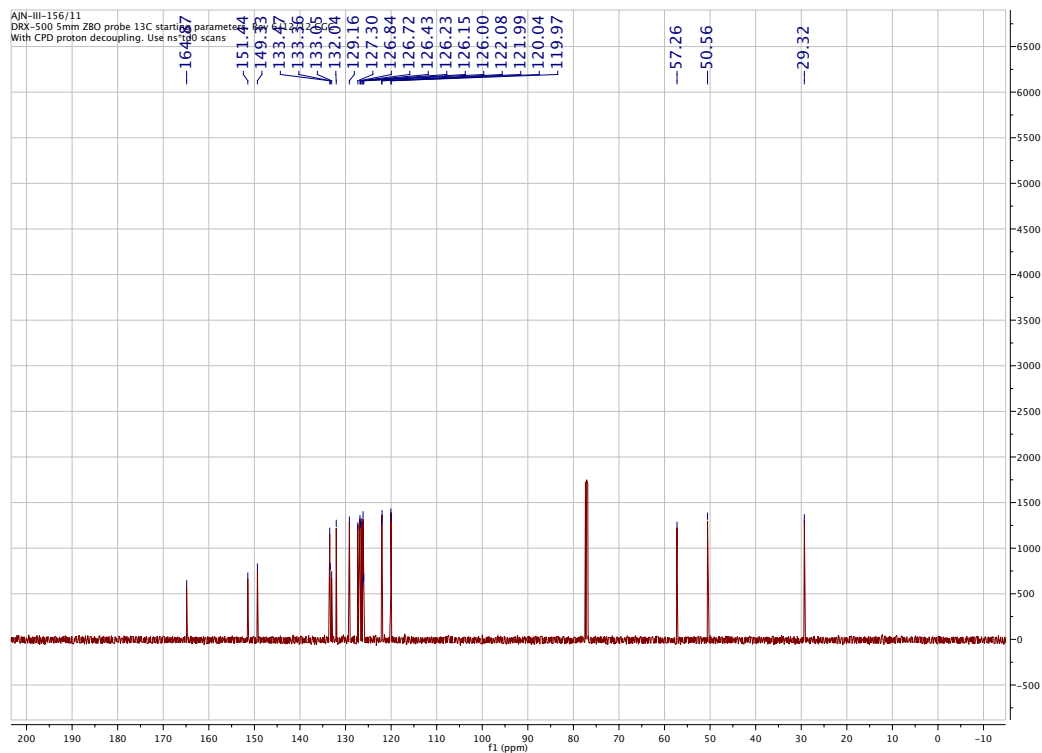

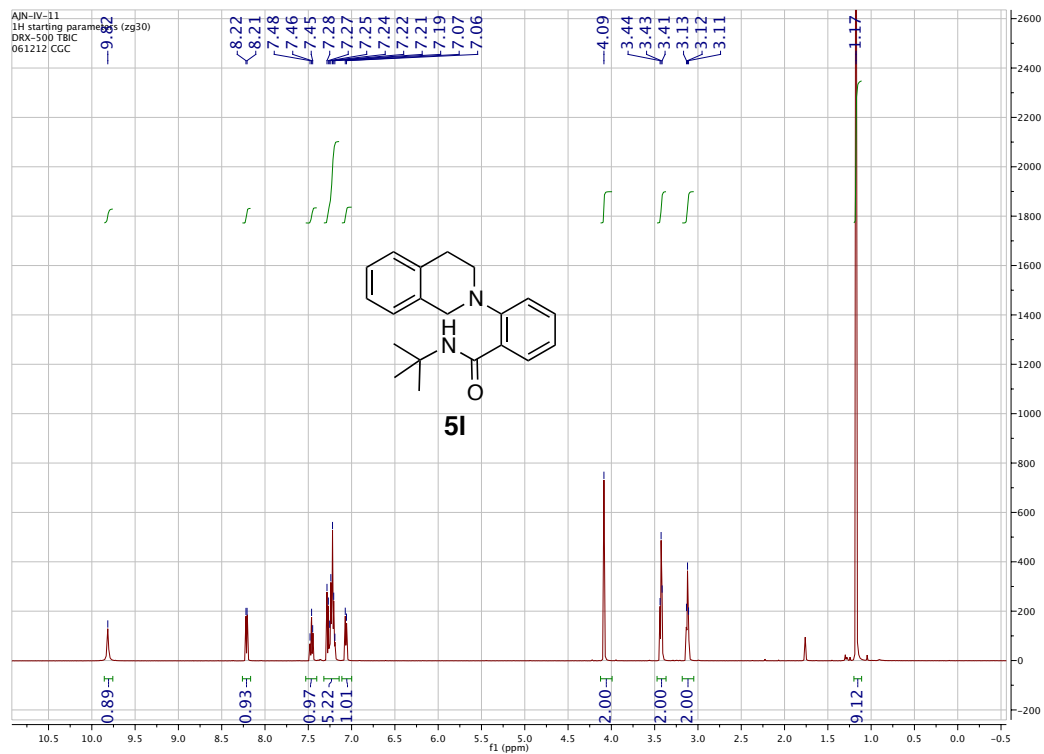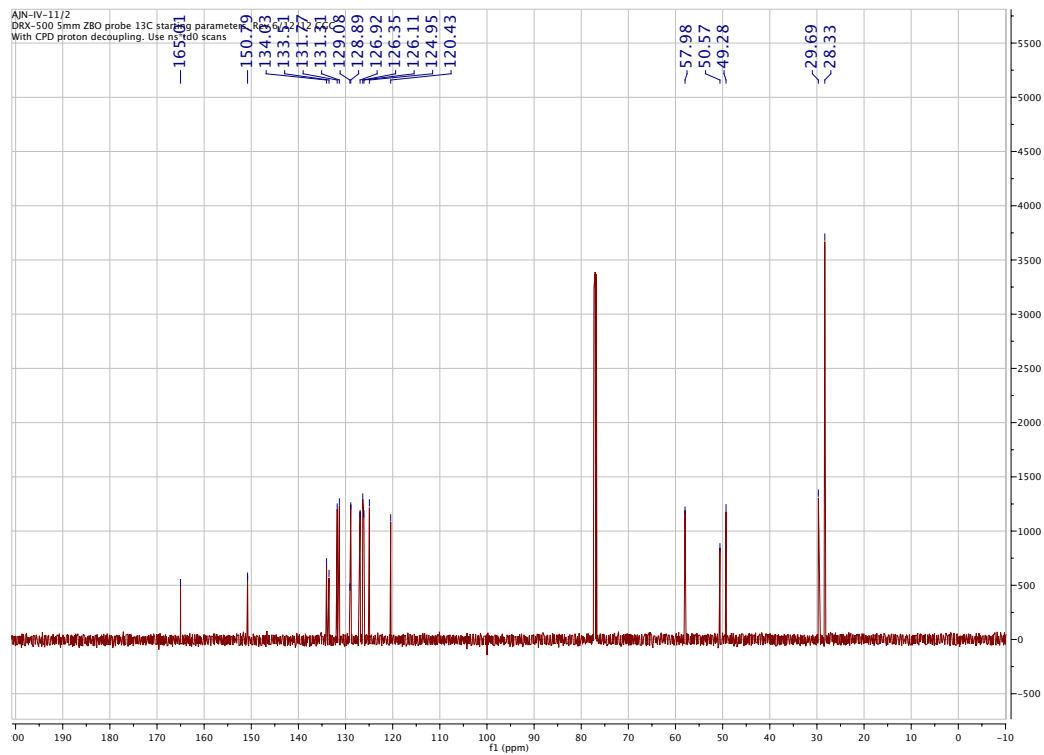

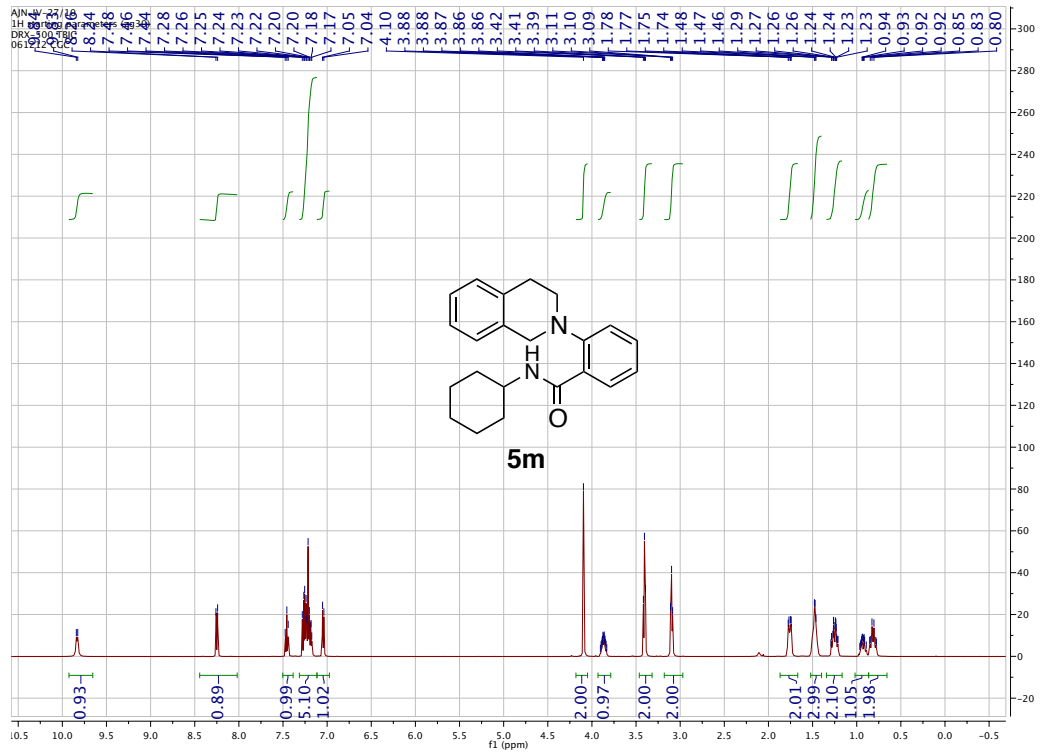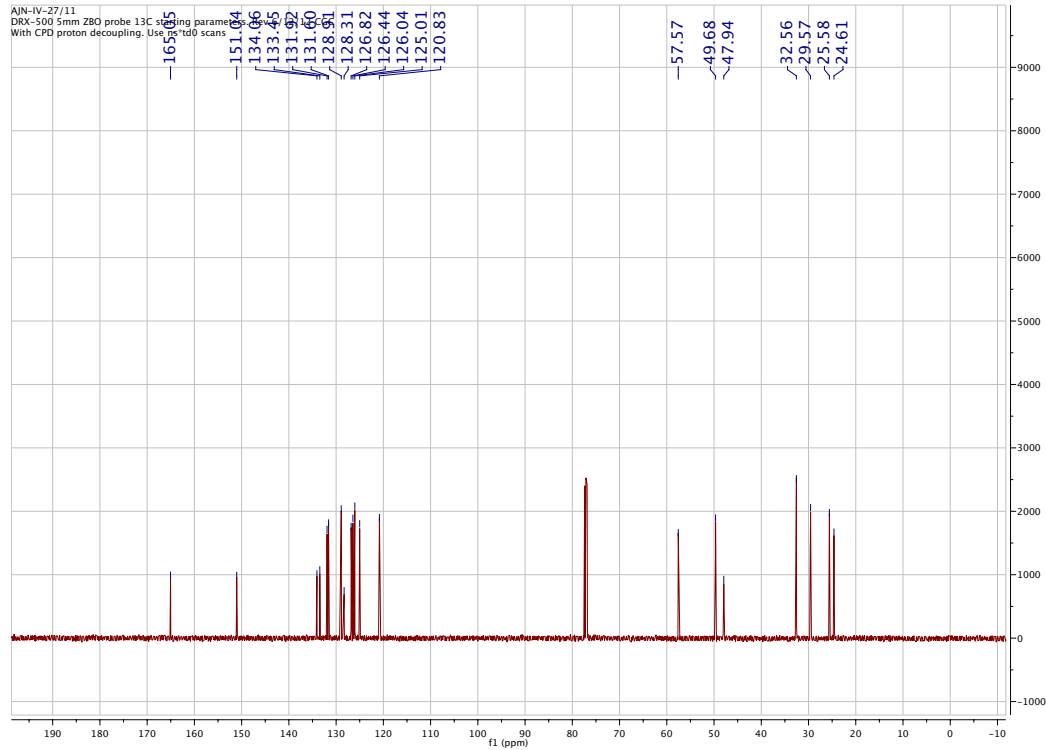

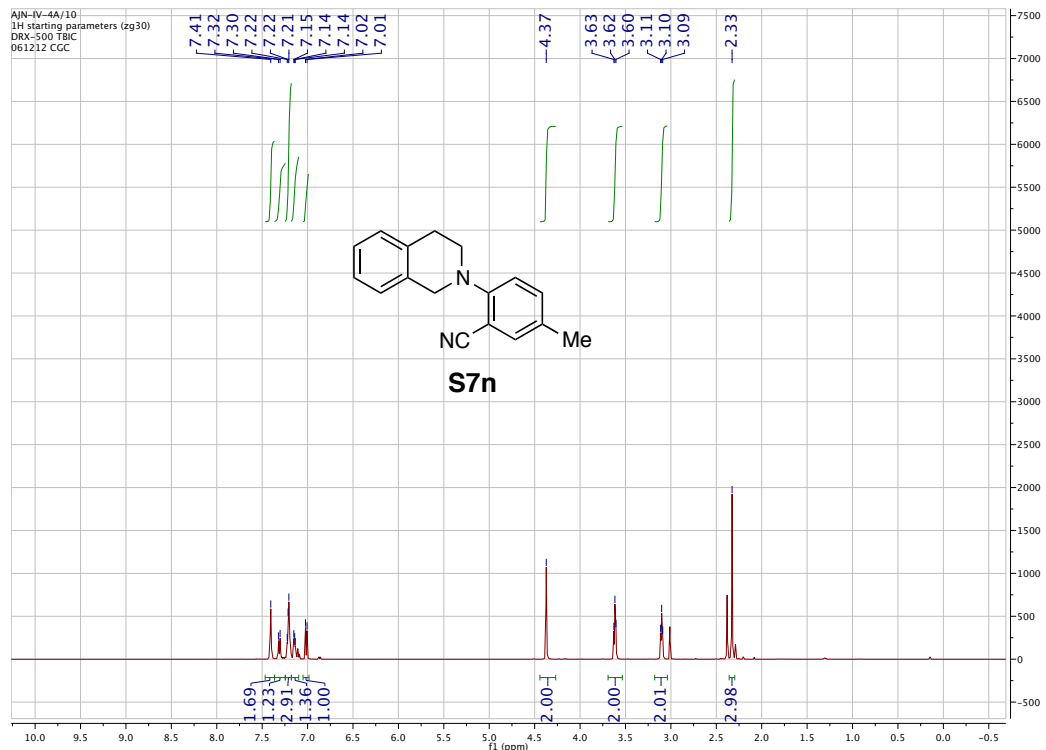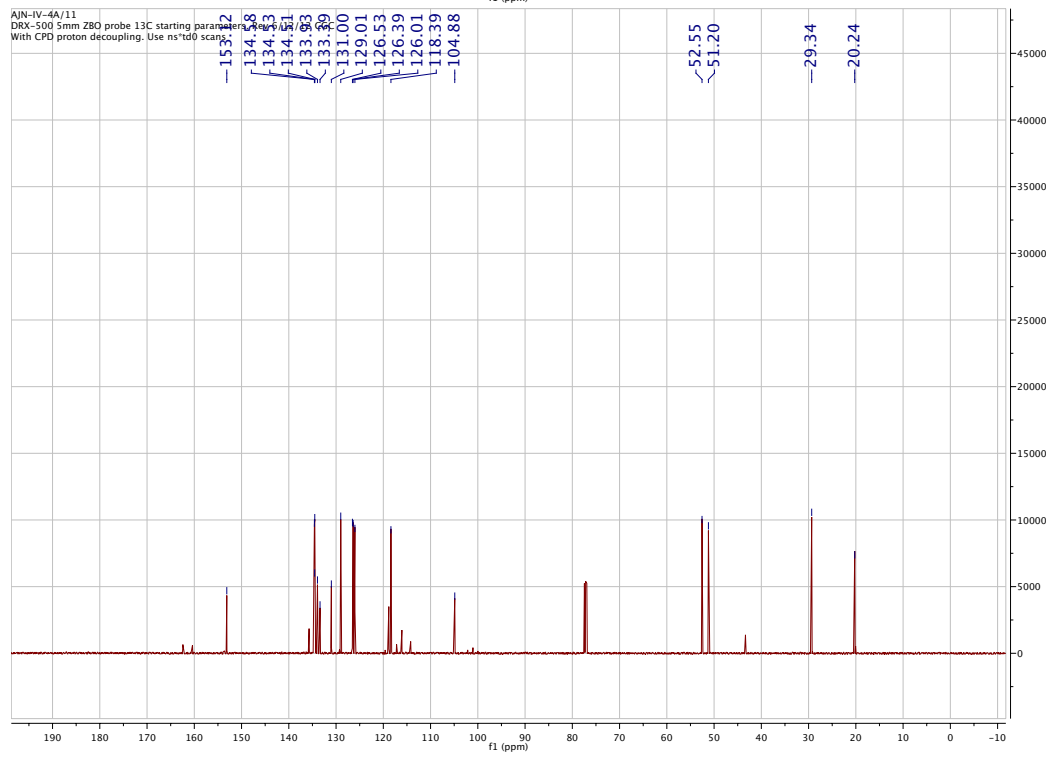

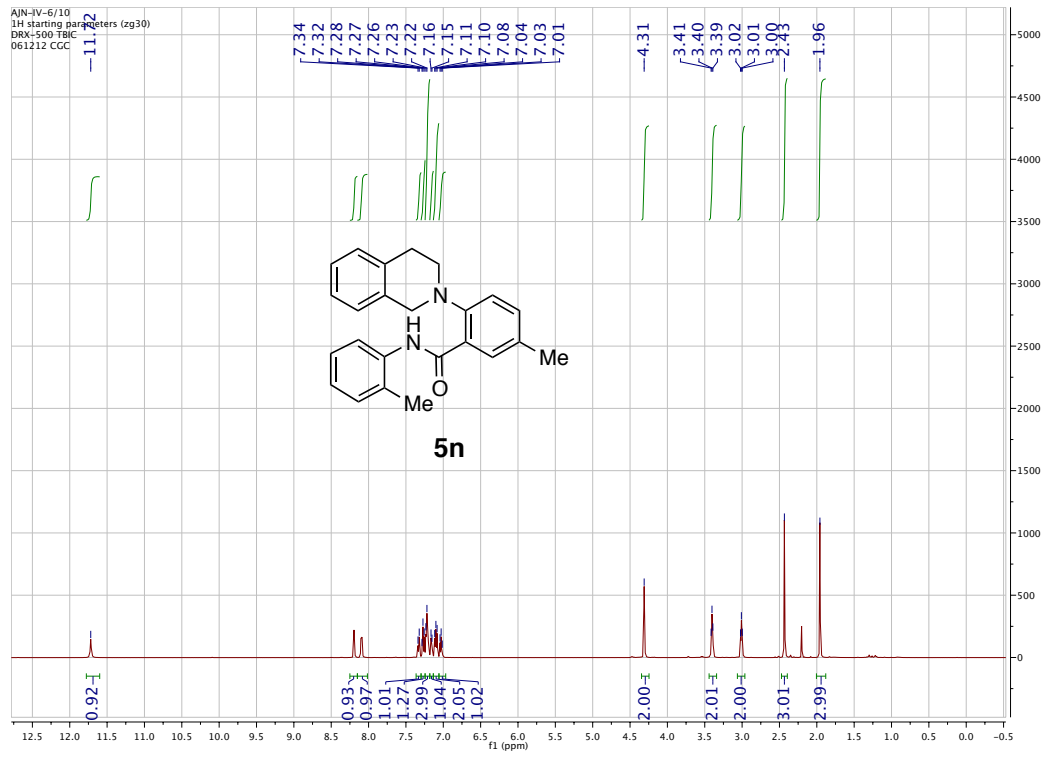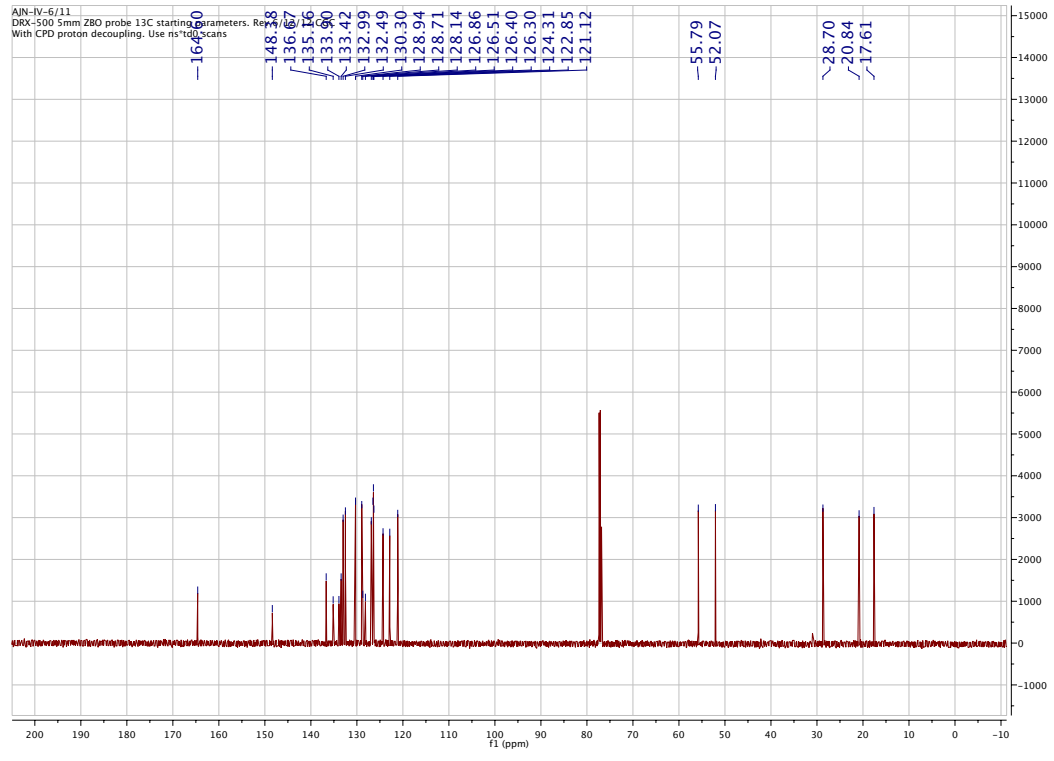

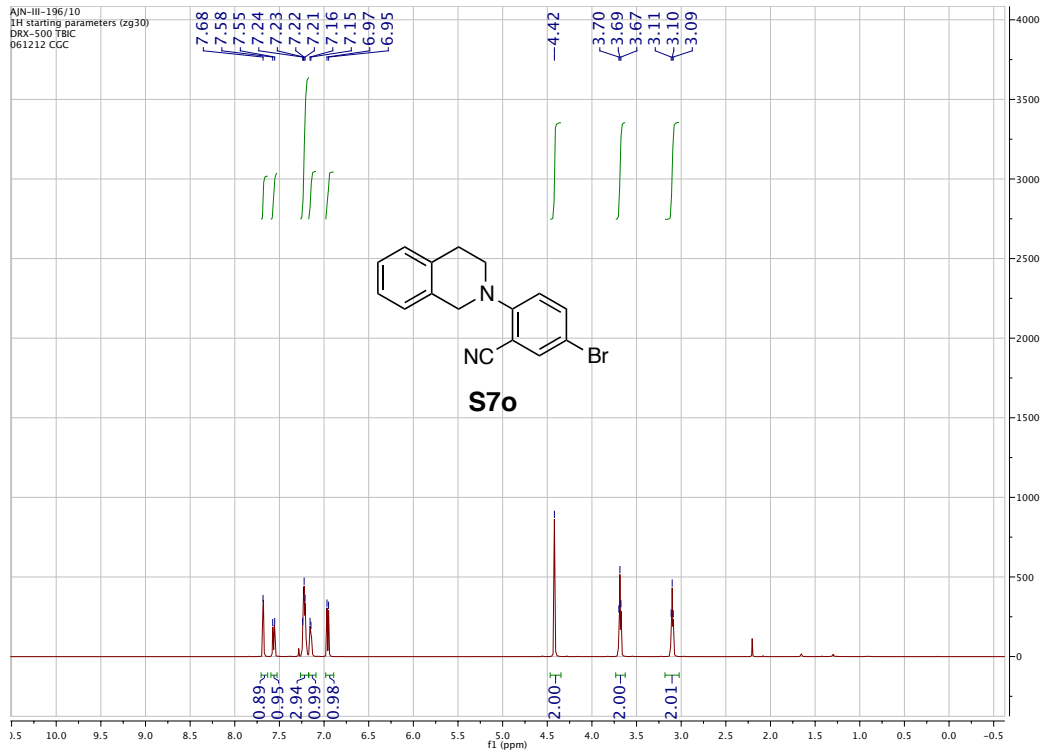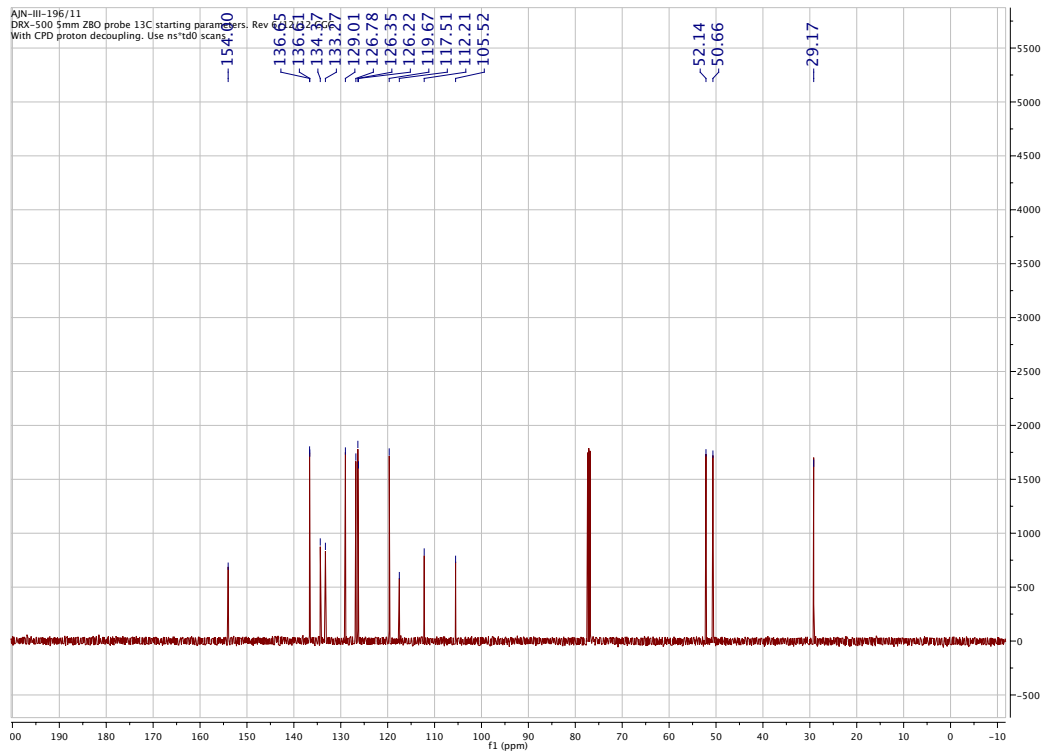



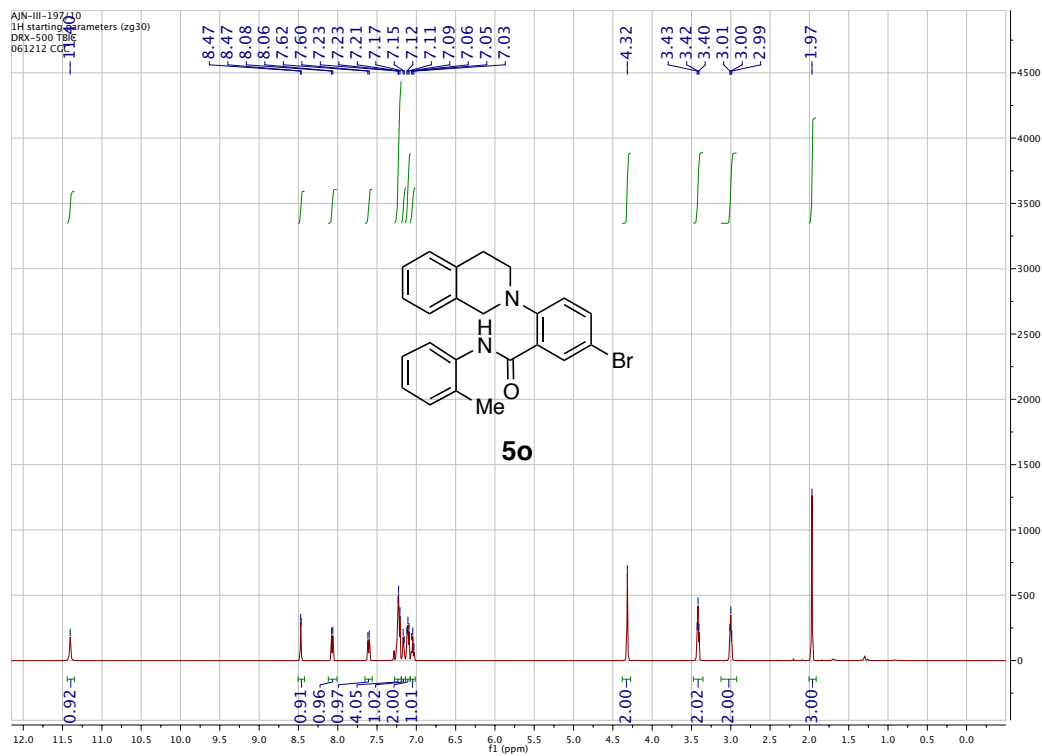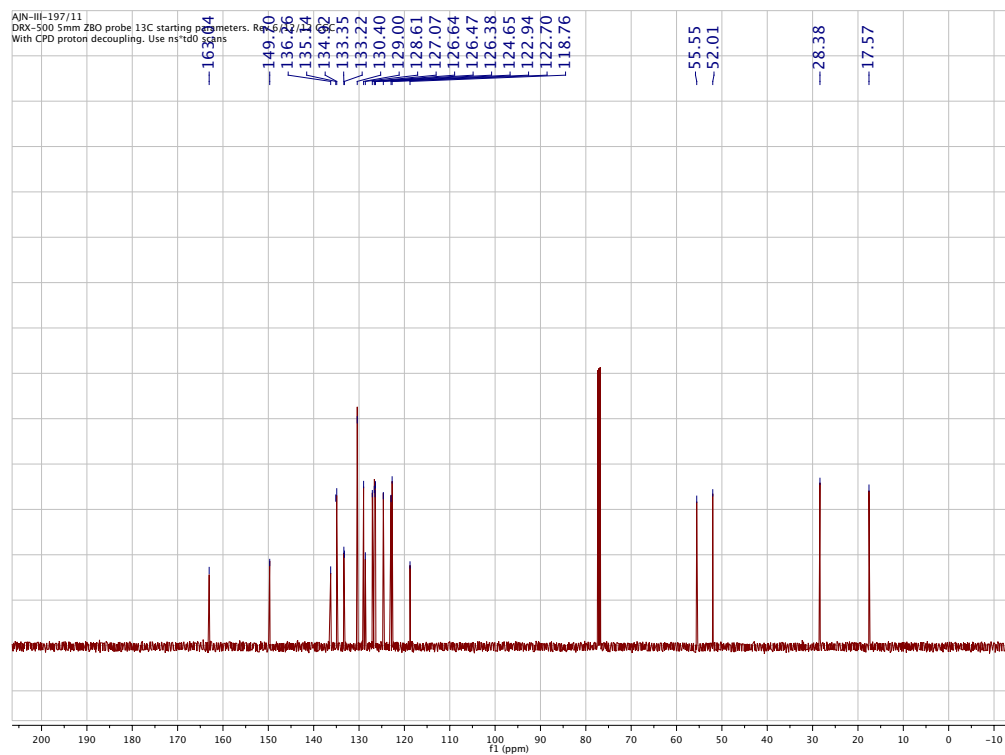

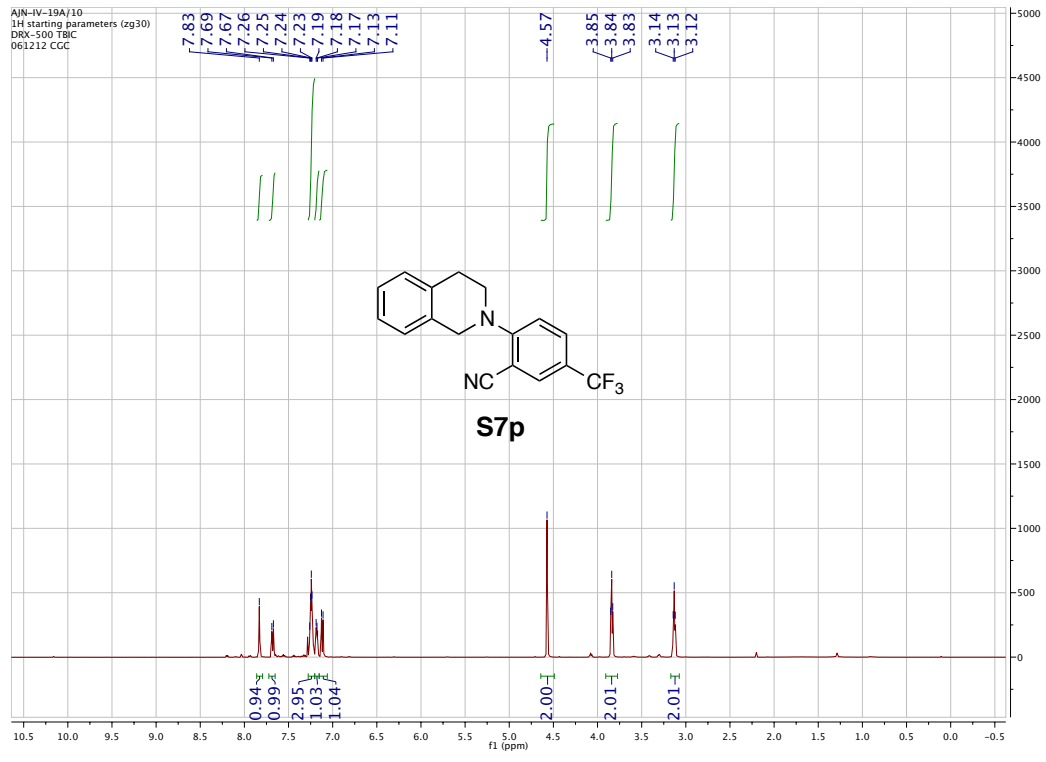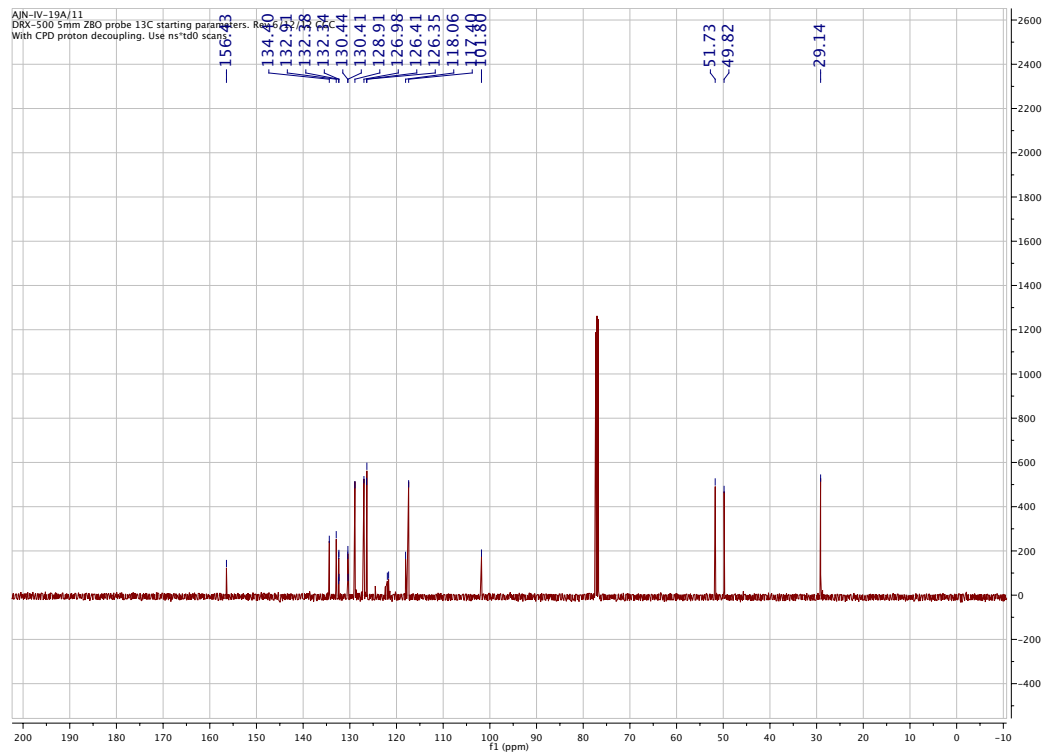

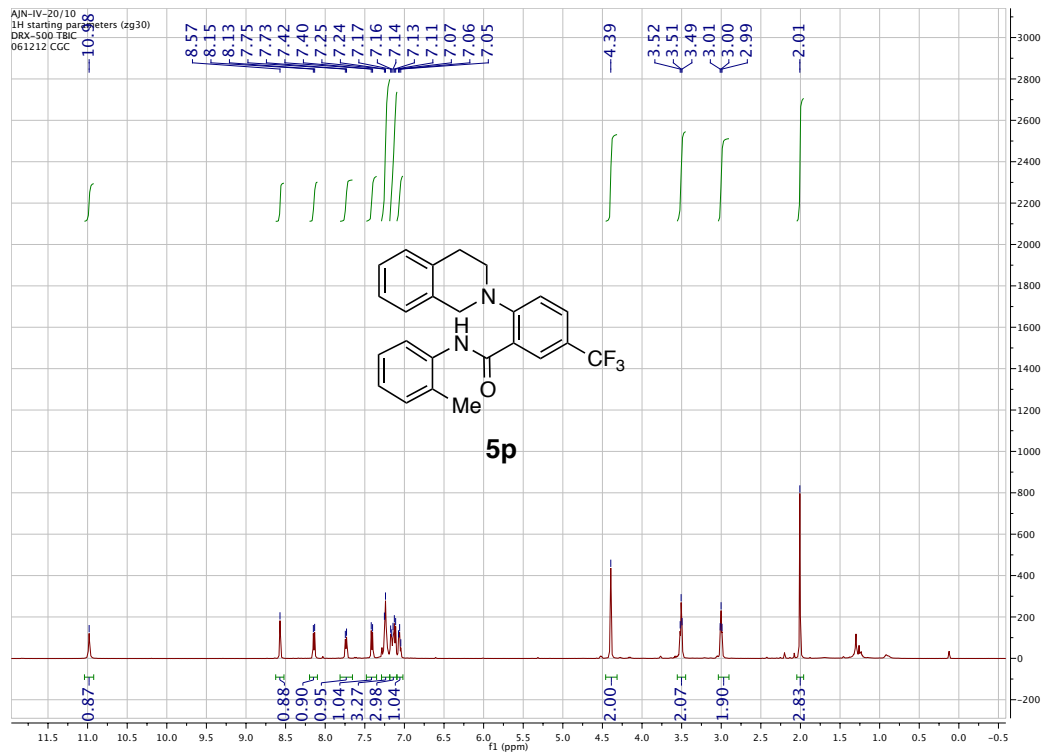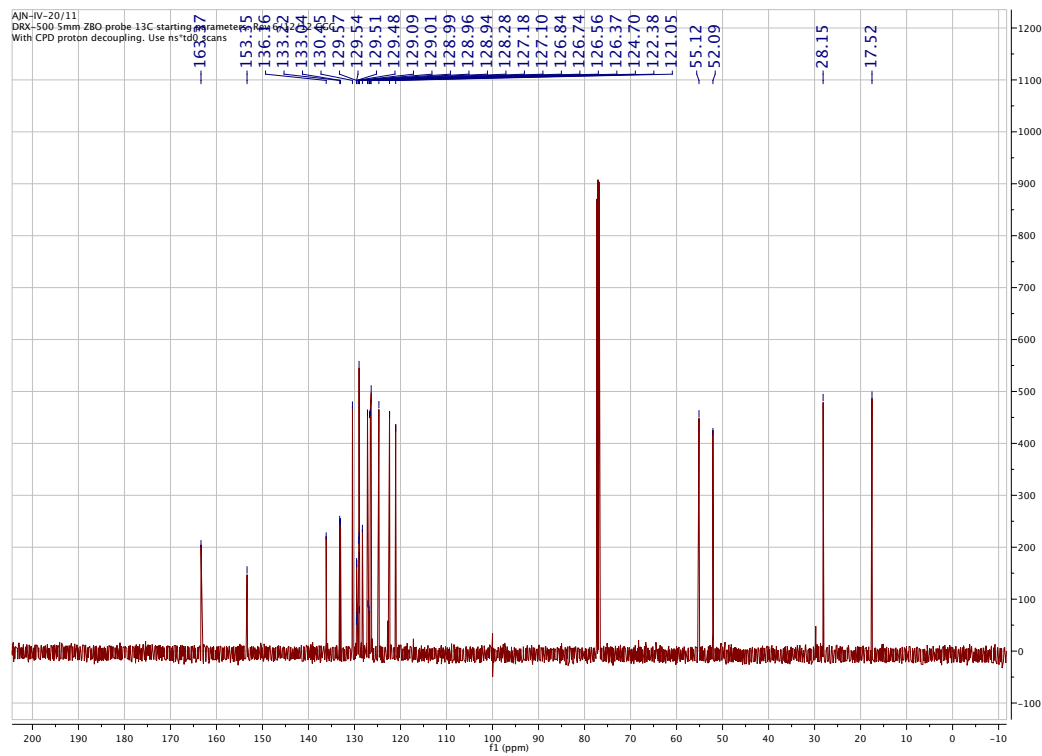

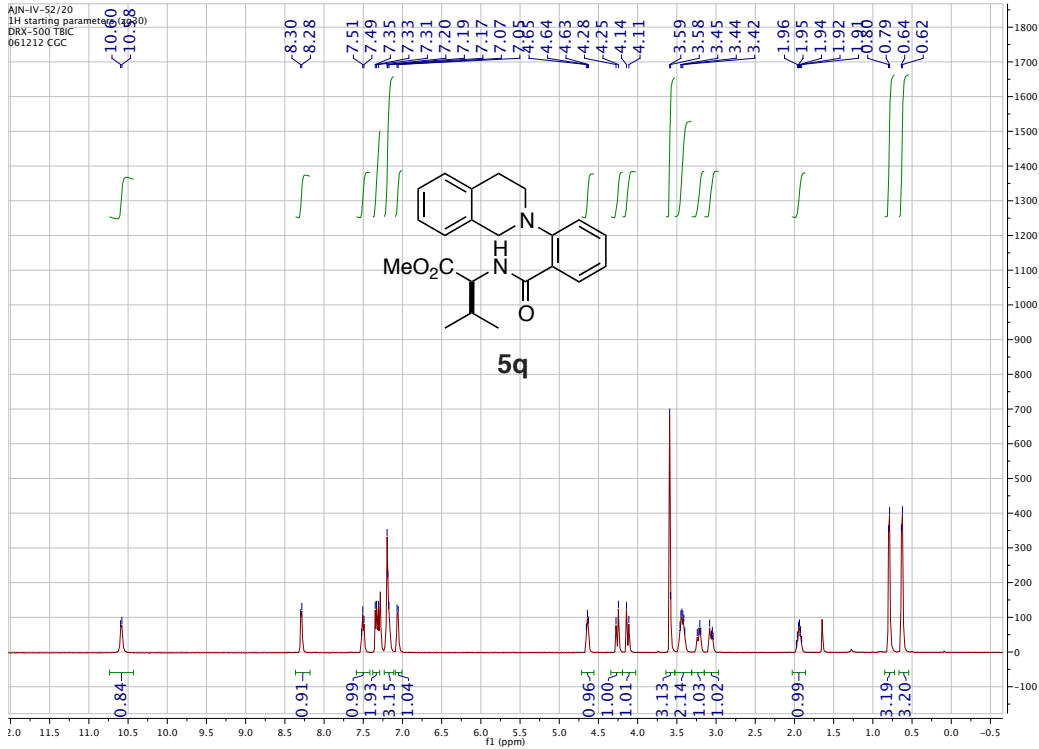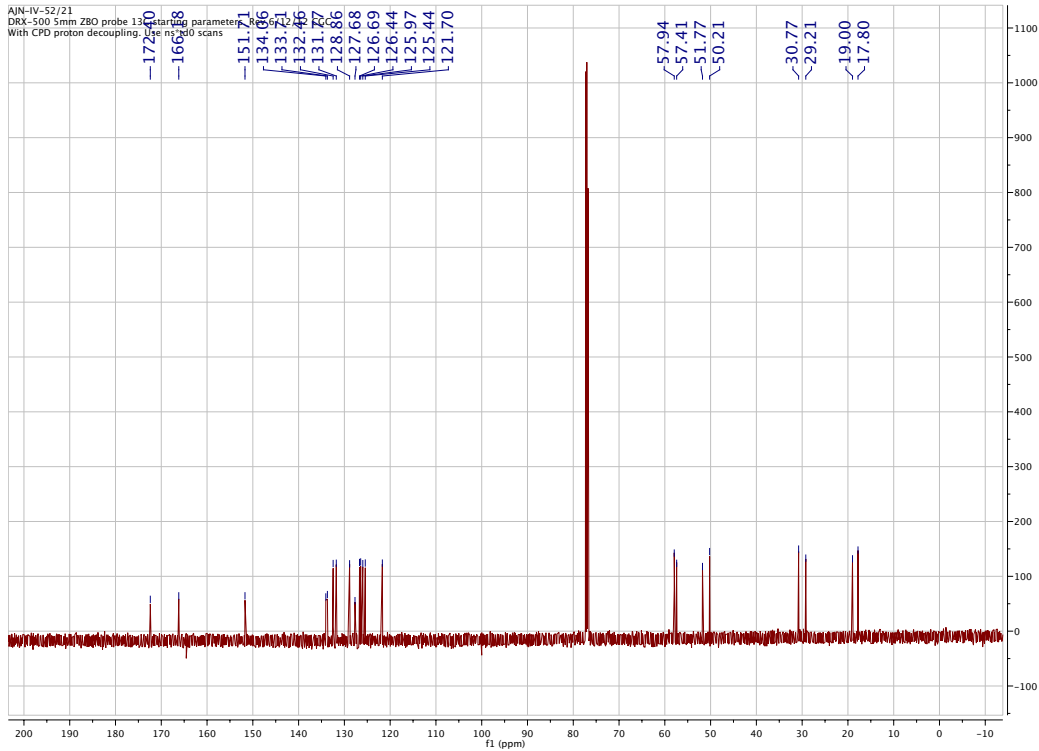

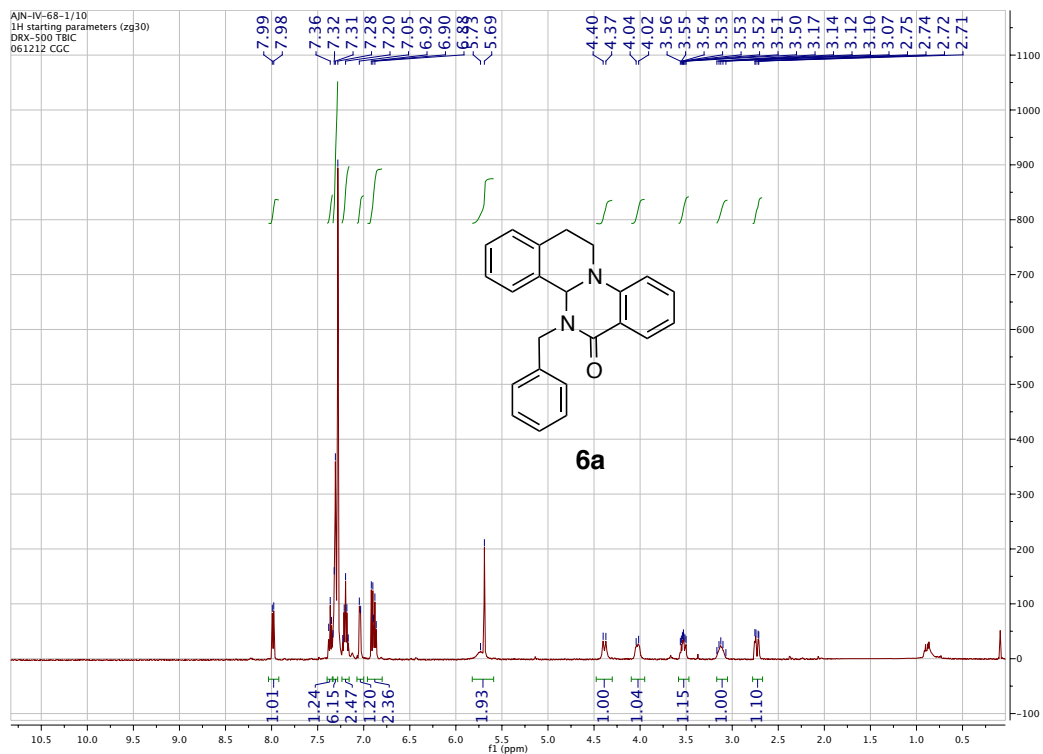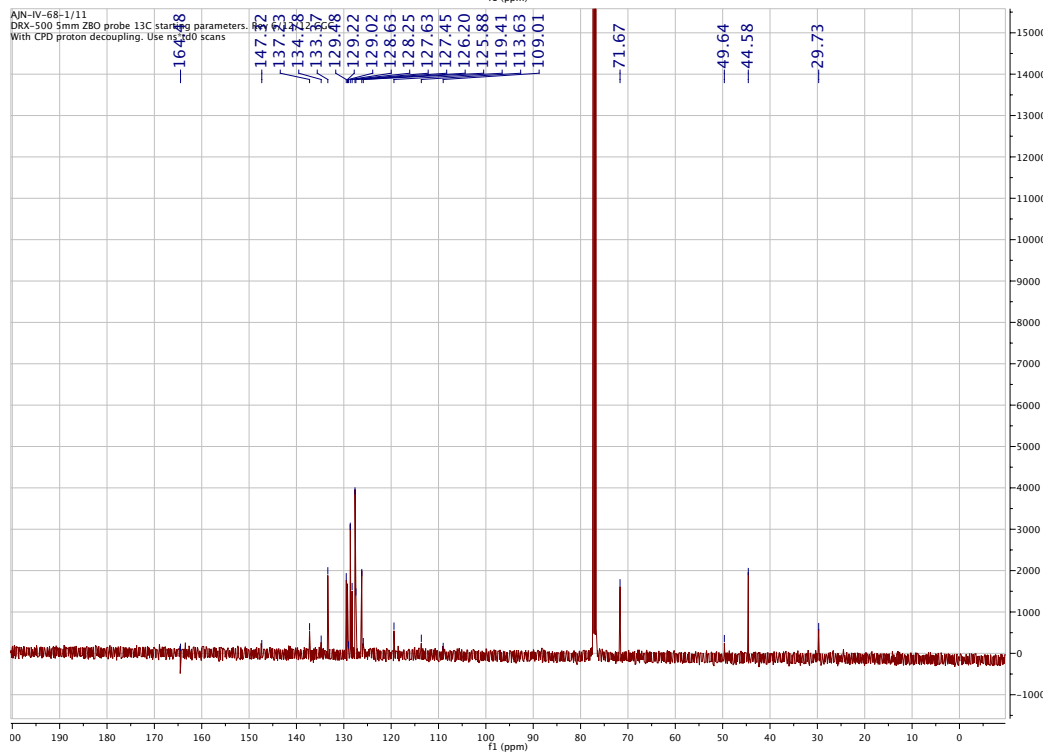

Only three of the five expected alkyl carbons show significant resonances in the  $^{13}\text{C}$  NMR spectrum above. HSQC confirms that the remaining two carbons are present and correlate with diastereotopic sets 1,1' and 2,2', corresponding to tetrahydroisoquinoline methylene and benzylic protons respectively.

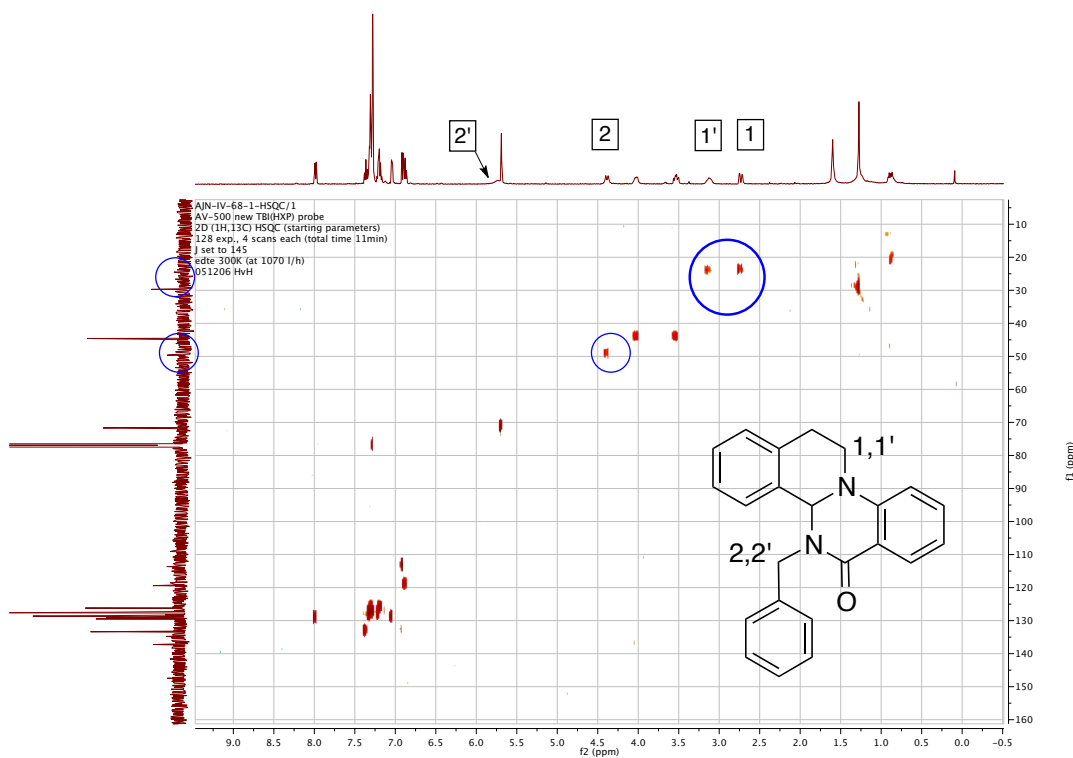

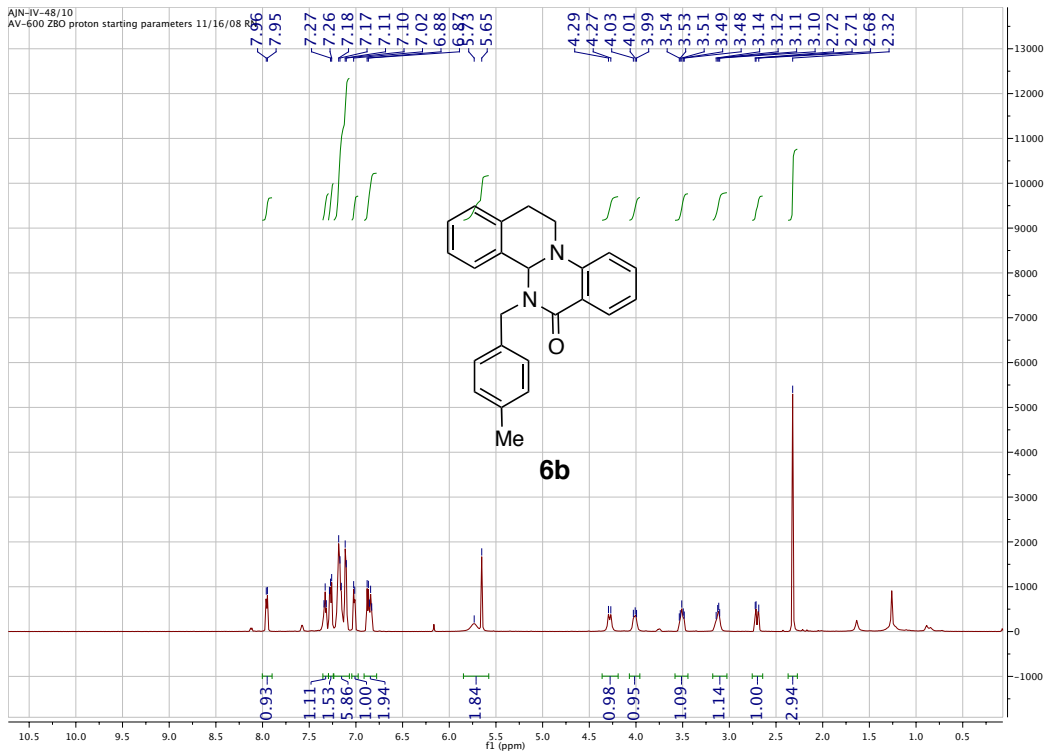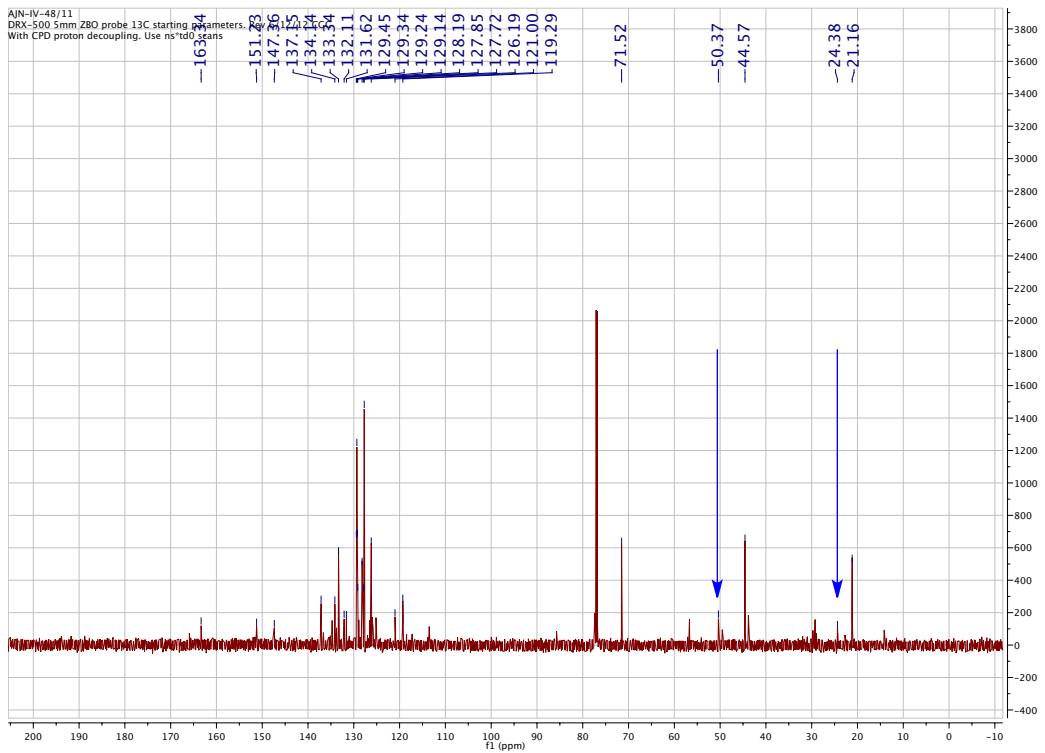

Only three of the five expected alkyl carbons show significant resonances in the  $^{13}\text{C}$  NMR spectrum above. HSQC confirms that the remaining two carbons are present and correlate with diastereotopic sets 1,1' and 2,2', corresponding to tetrahydroisoquinoline methylene and benzylic protons respectively.

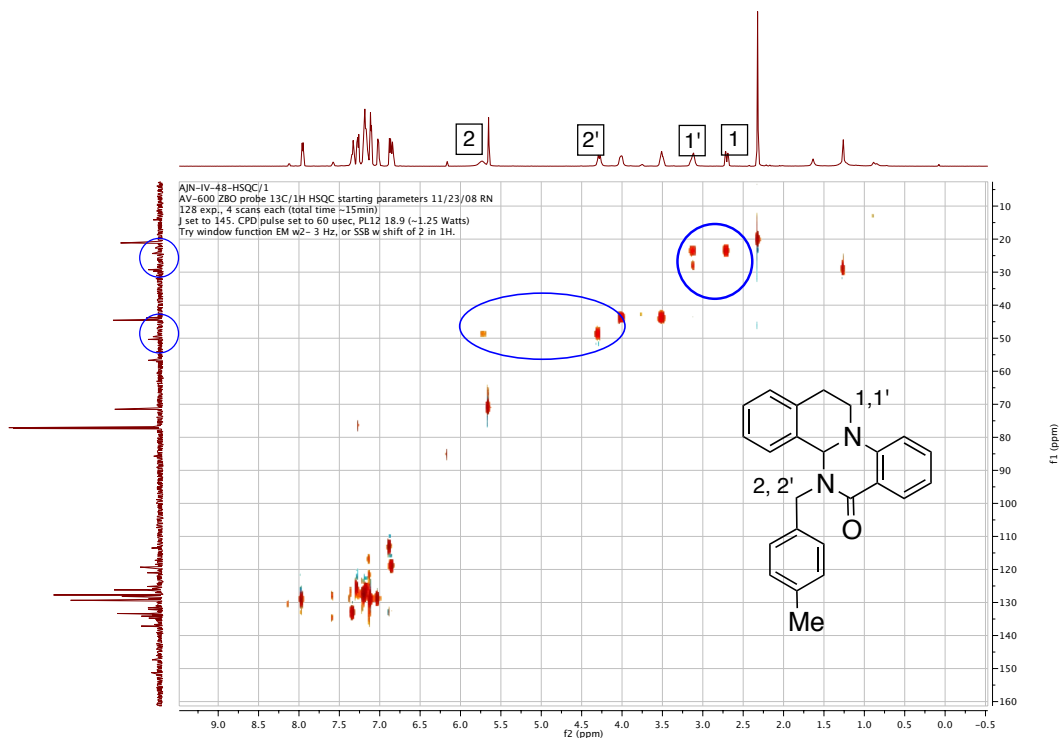



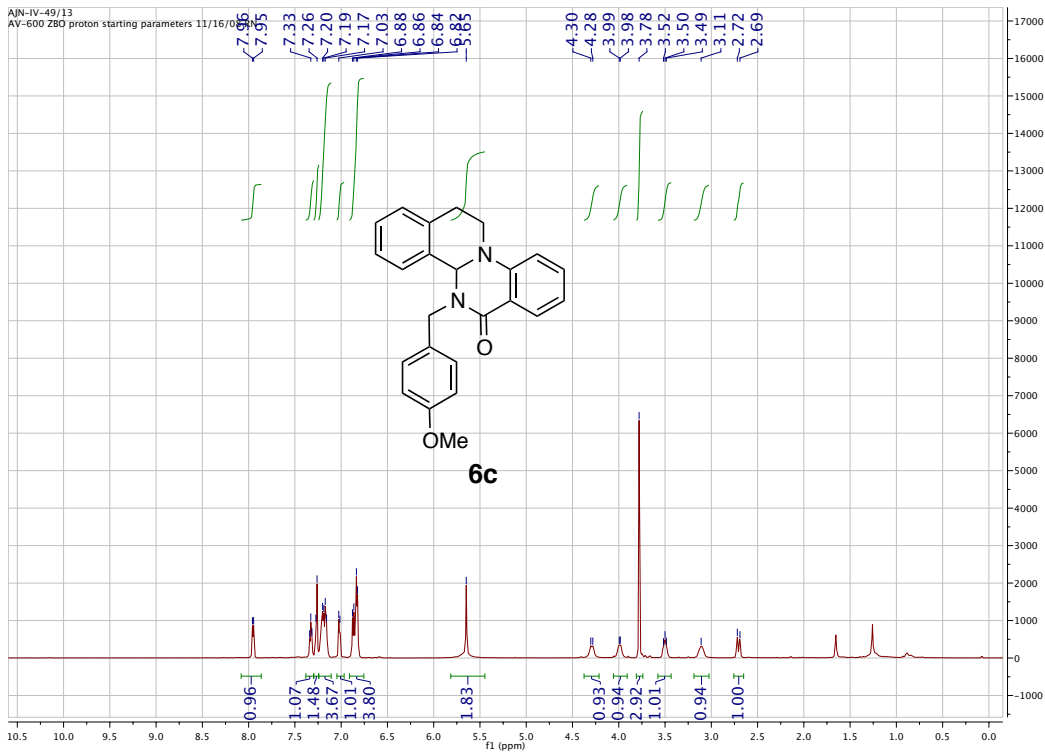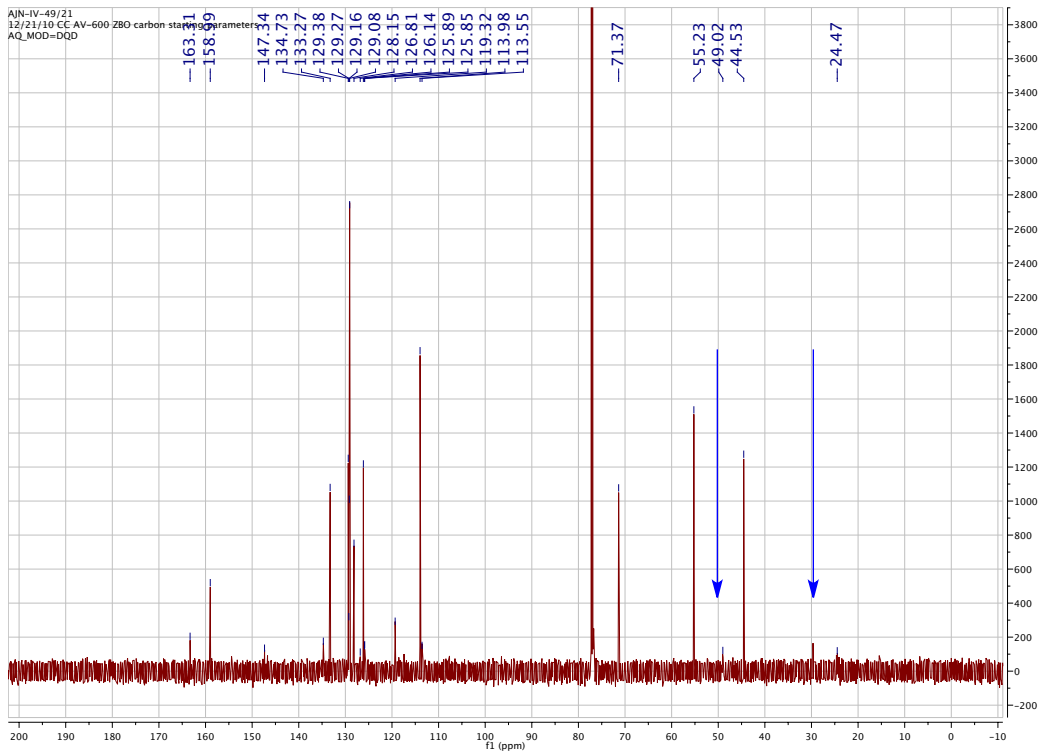

Only three of the five expected alkyl carbons show significant resonances in the  $^{13}\text{C}$  NMR spectrum above. HSQC confirms that the remaining two carbons are present and correlate with diastereotopic proton sets 1,1' and 2,2', corresponding to tetrahydroisoquinoline methylene and benzylic protons respectively.

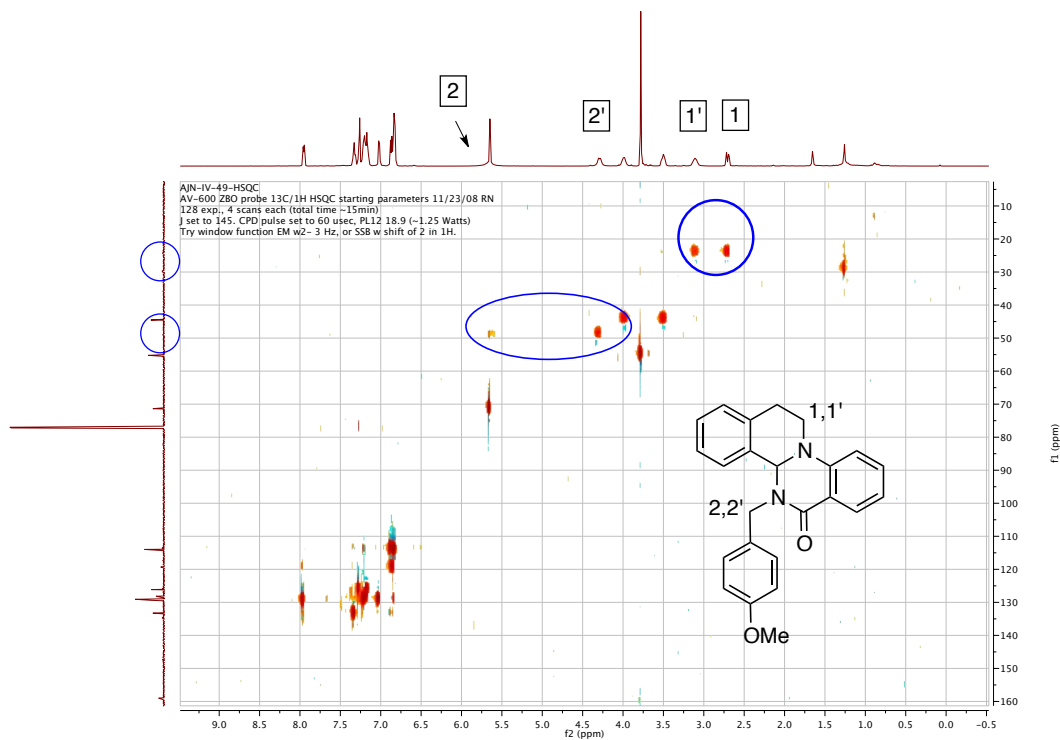

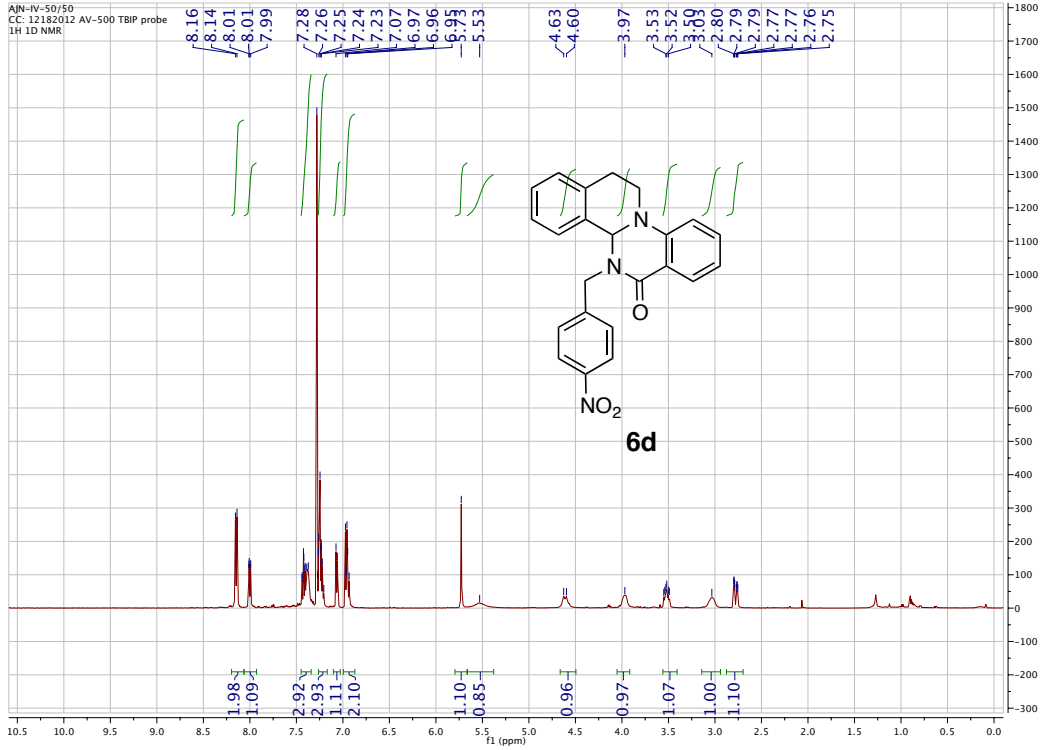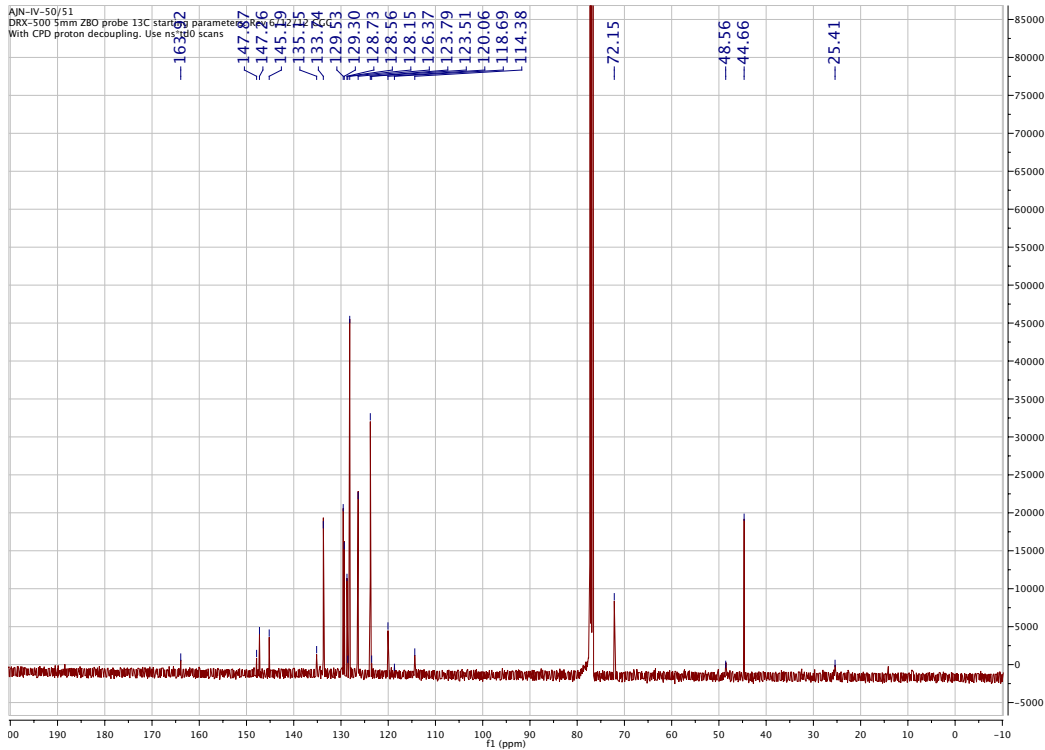

Only two of the four expected alkyl carbons show significant resonances in the  $^{13}\text{C}$  NMR spectrum above. HSQC confirms that the remaining two carbons are present and correlate with diastereotopic proton sets 1,1' and 2,2', corresponding to tetrahydroisoquinoline methylene and benzylic protons respectively.

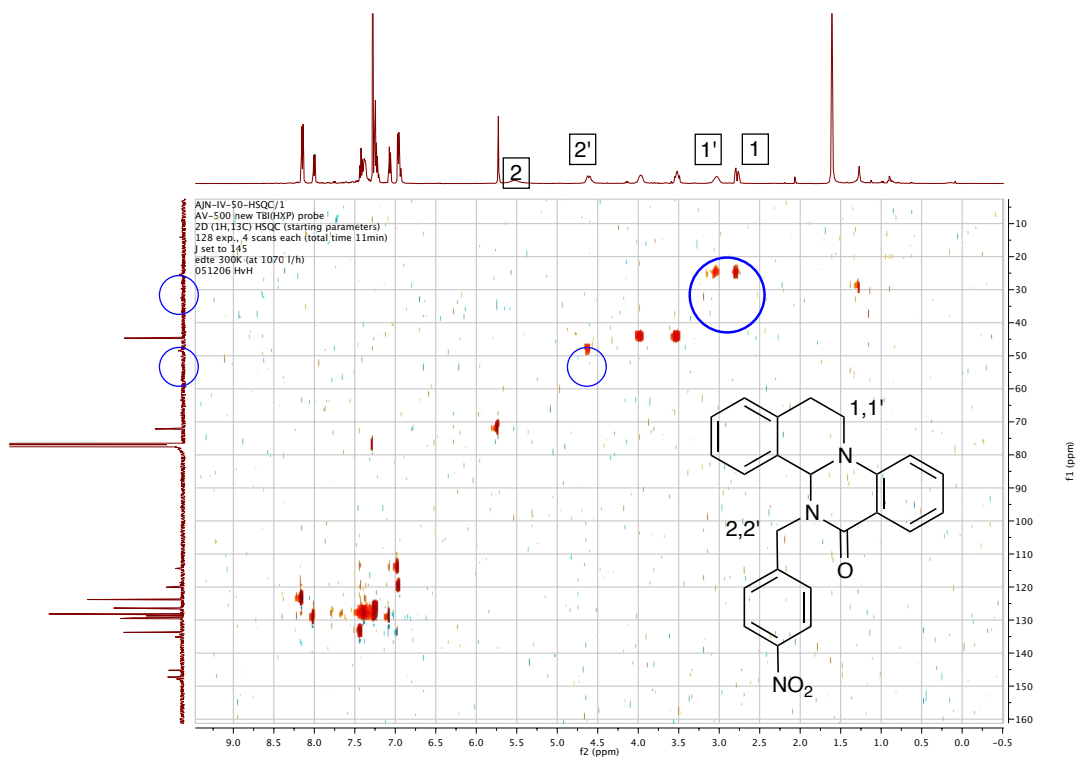

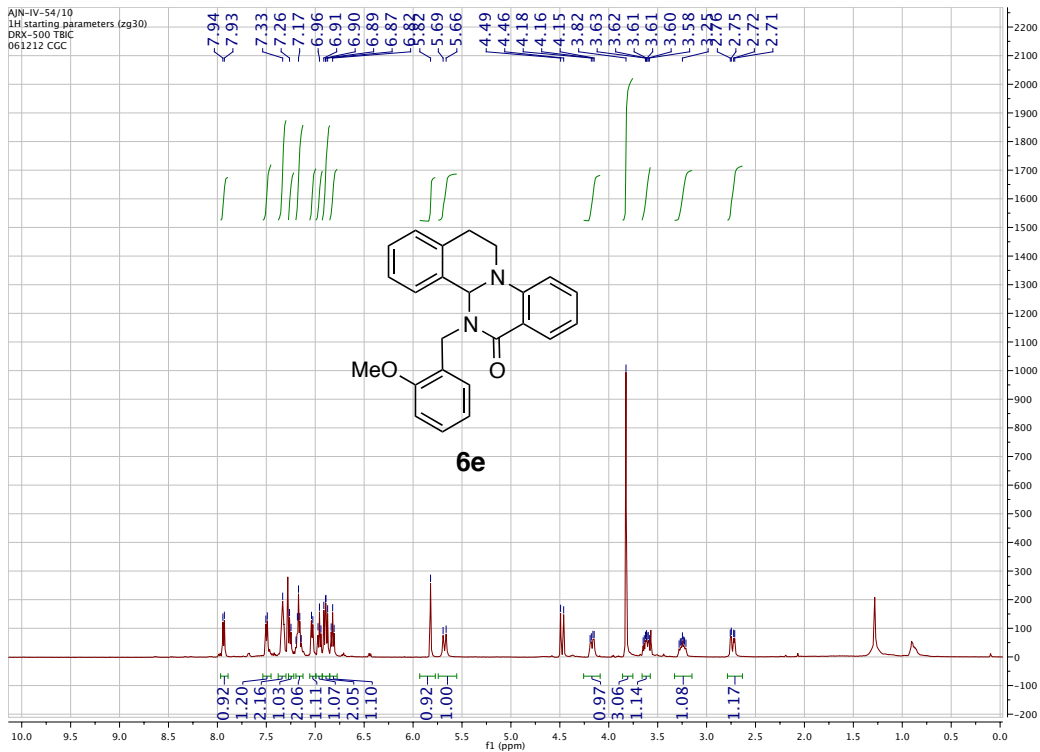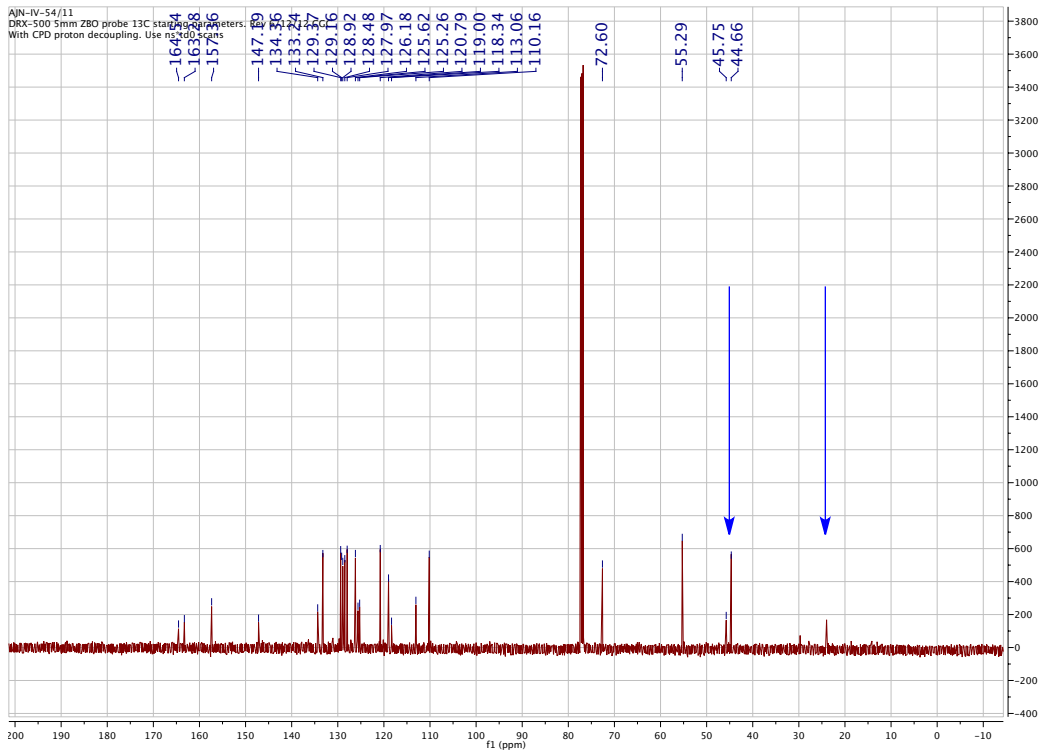

Only three of the five expected alkyl carbons show significant resonances in the  $^{13}\text{C}$  NMR spectrum above. HSQC confirms that the remaining two carbons are present and correlate with diastereotopic proton sets 1,1' and 2,2', corresponding to tetrahydroisoquinoline methylene and benzylic protons respectively.

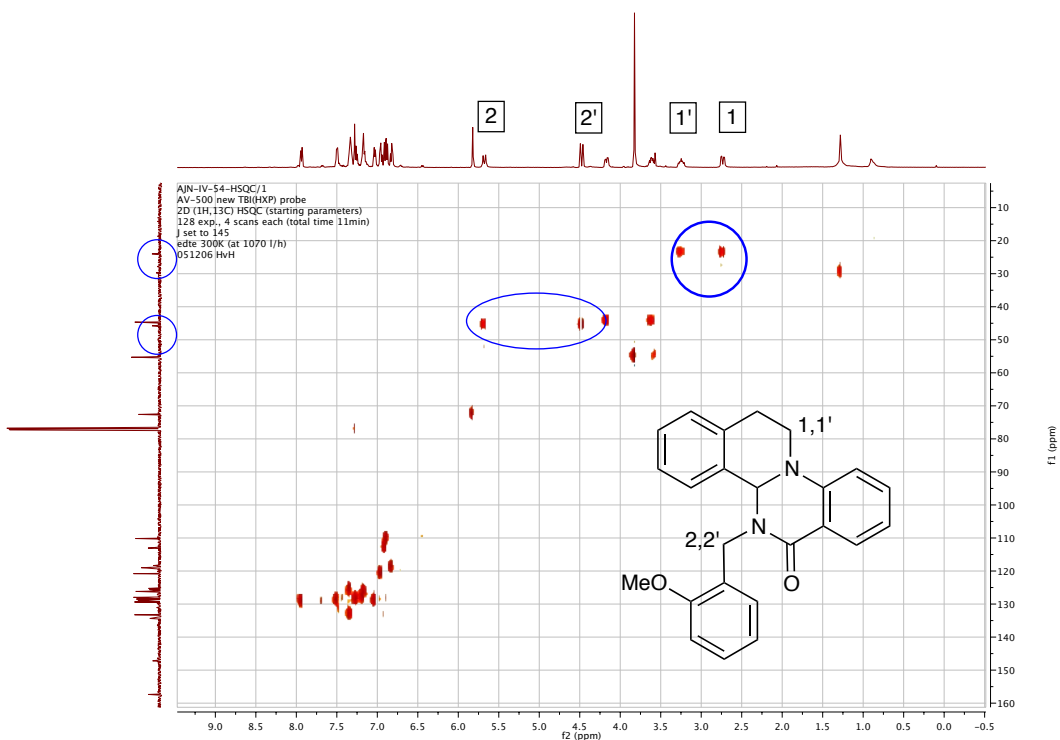

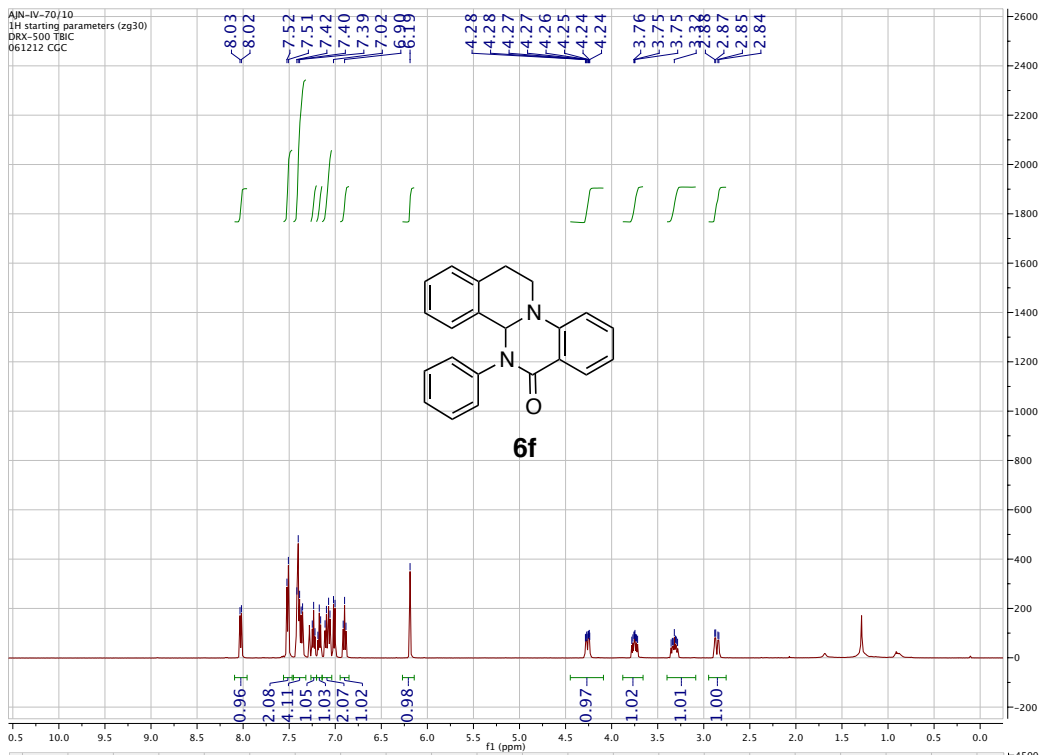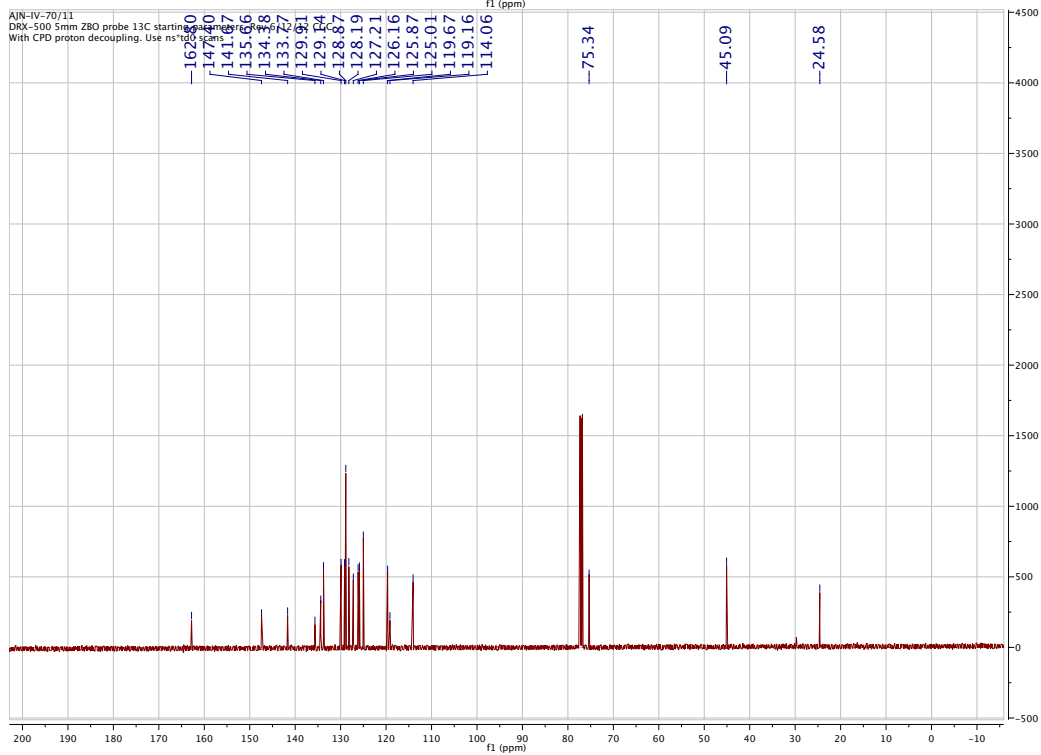

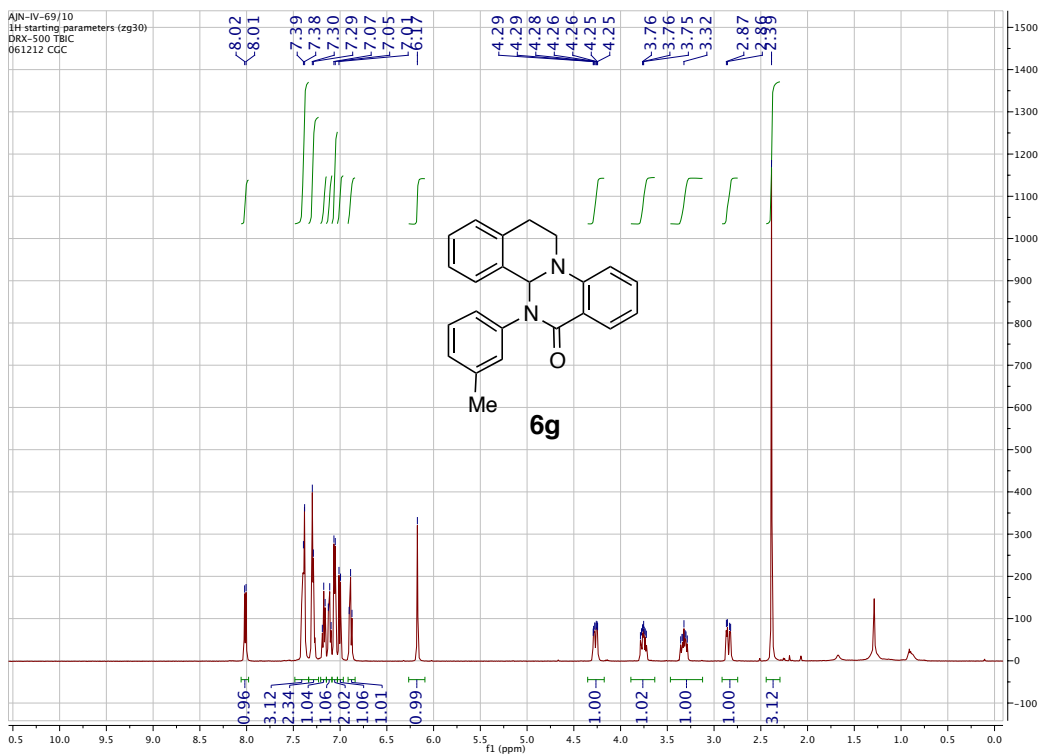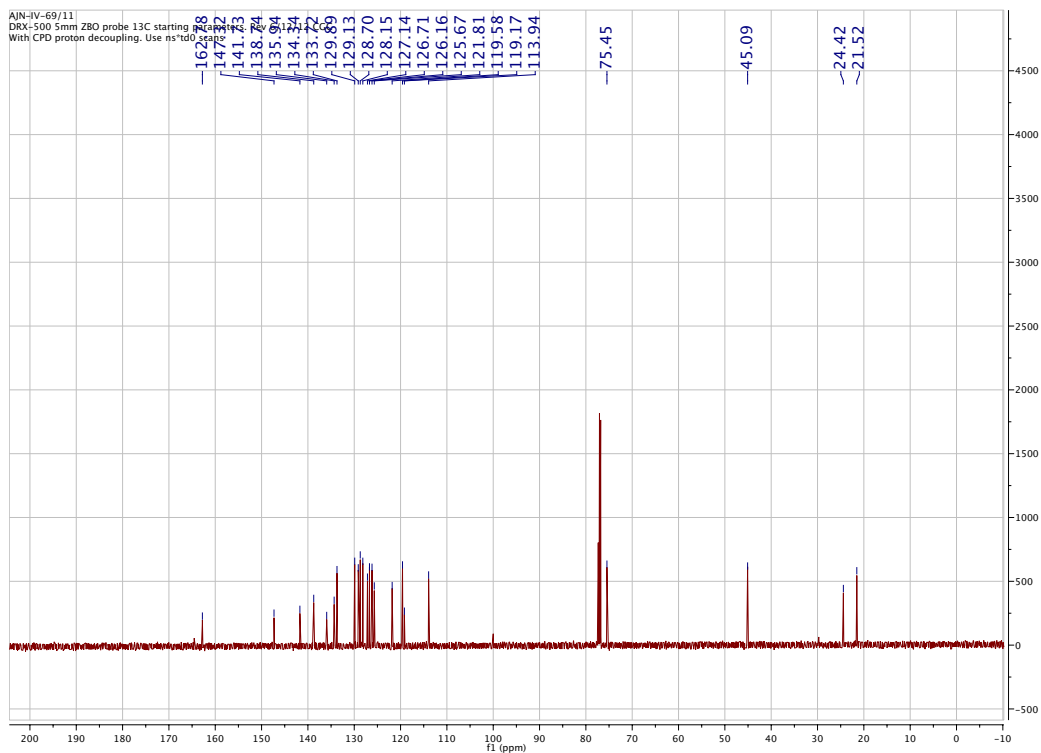



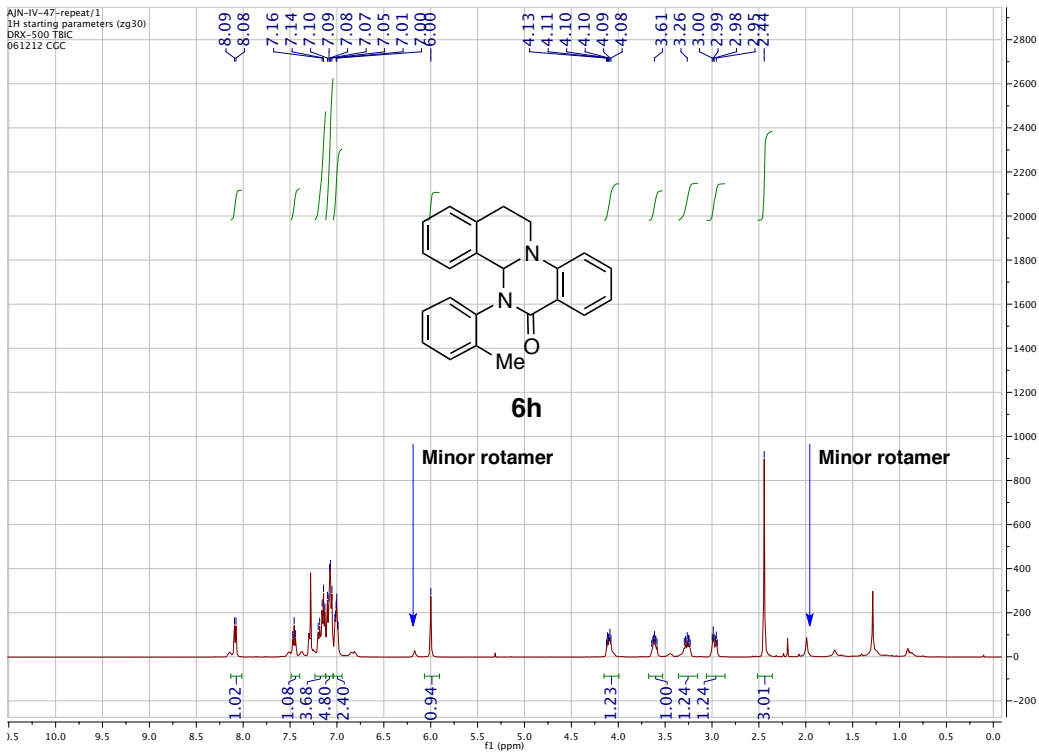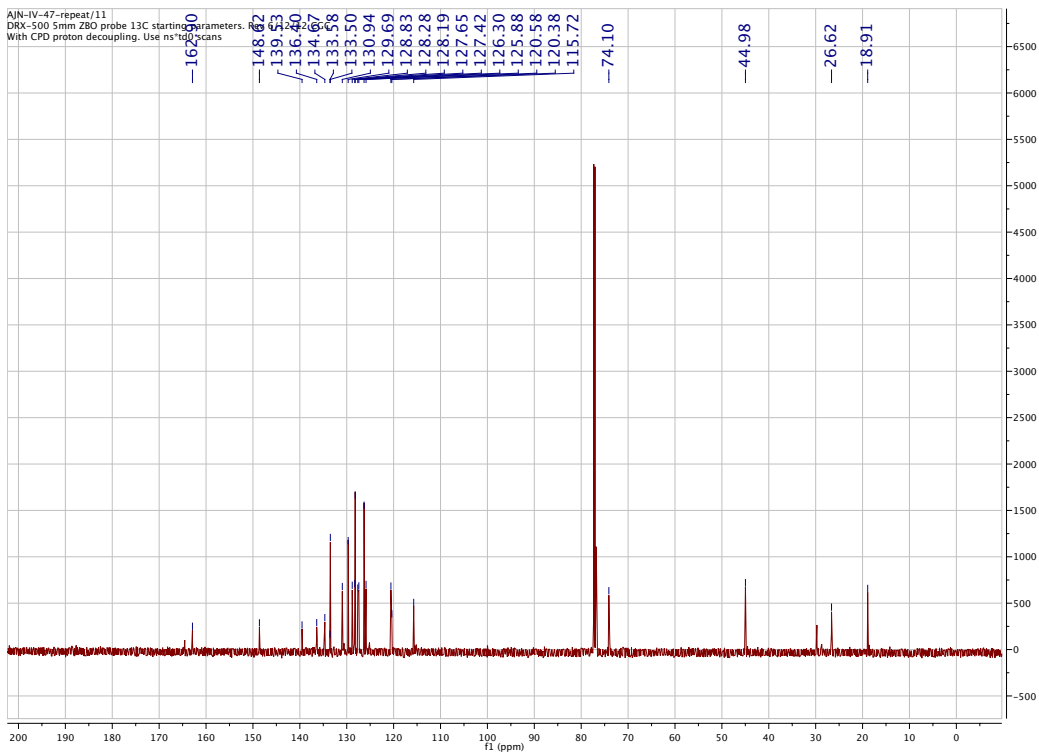

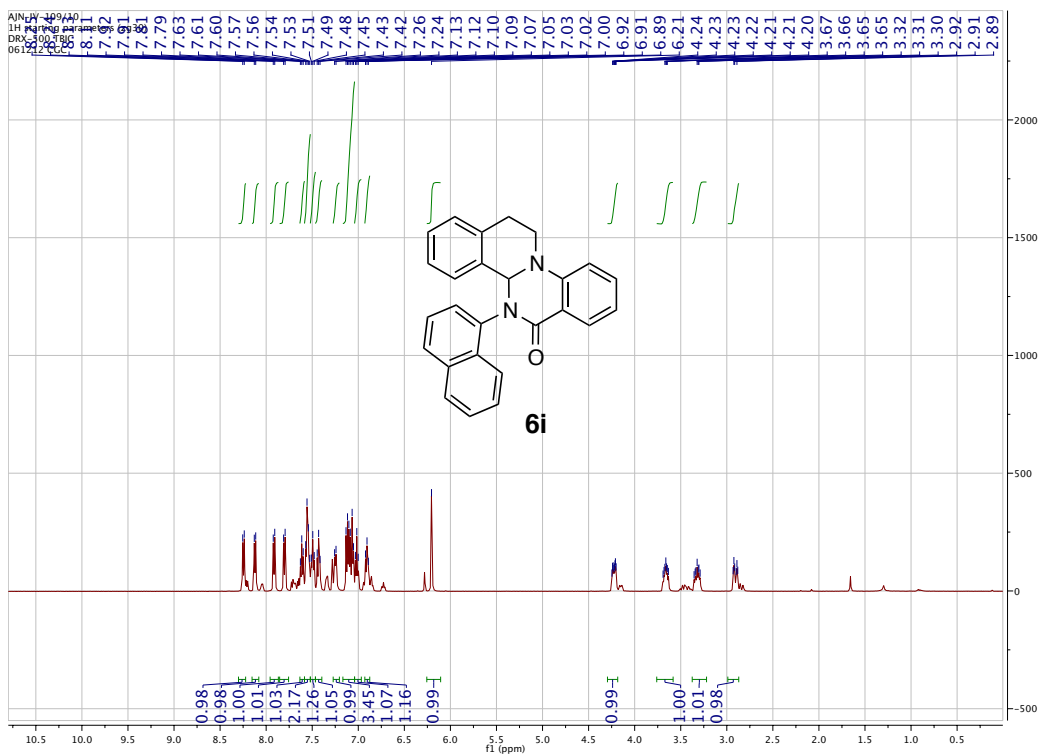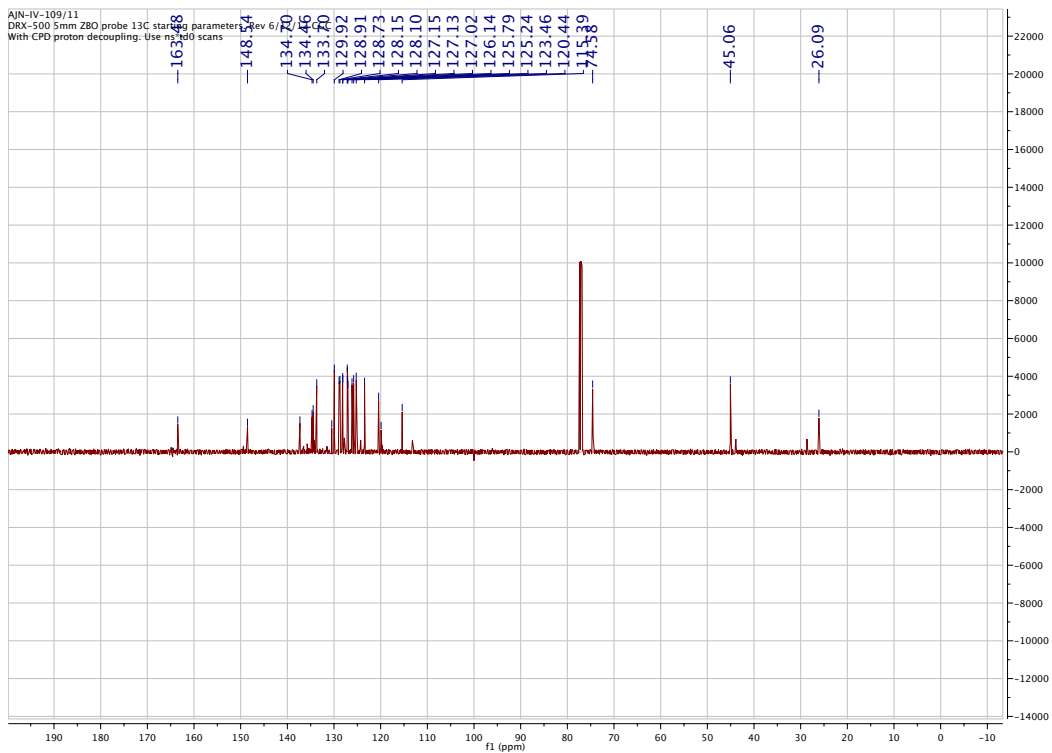

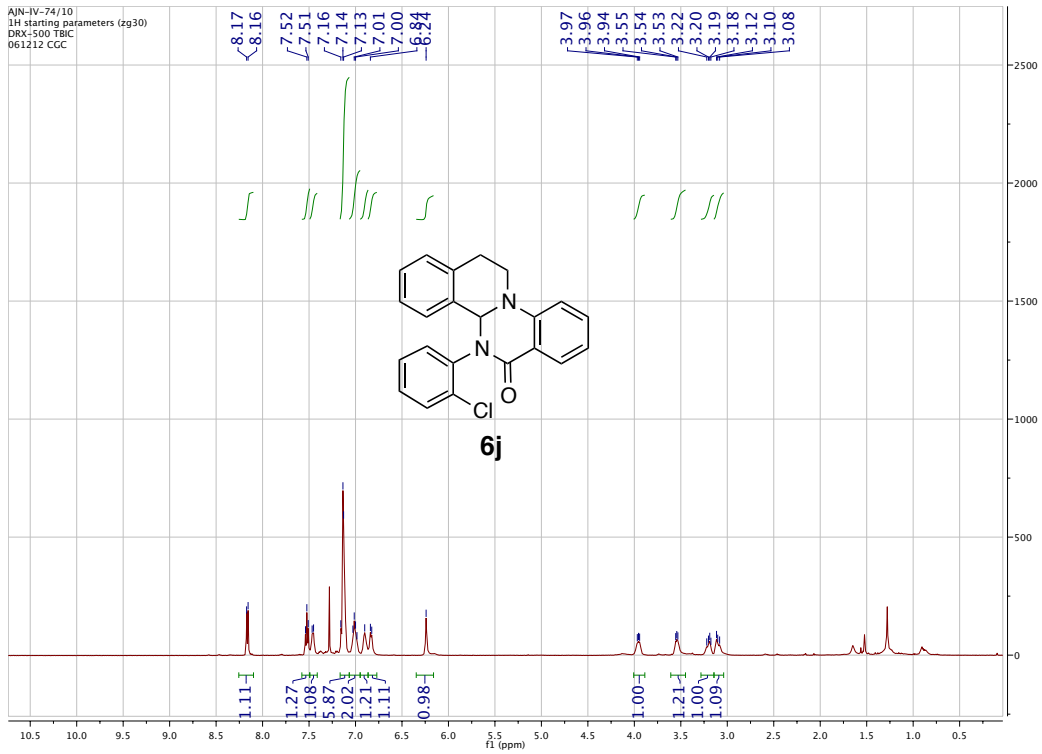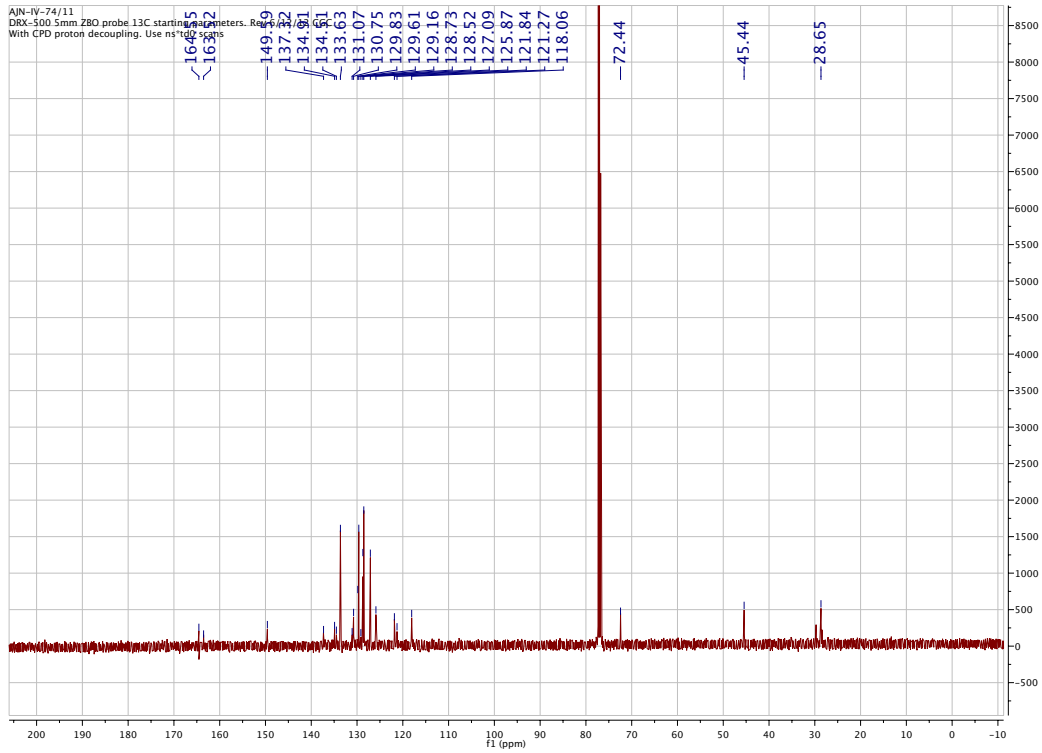

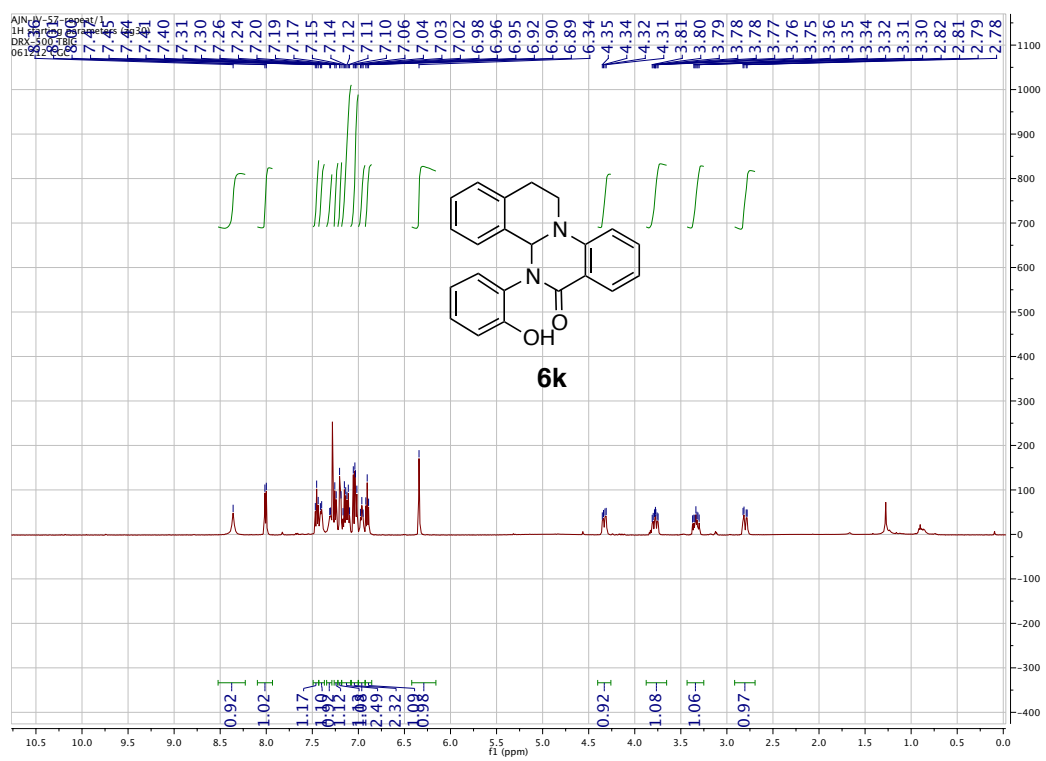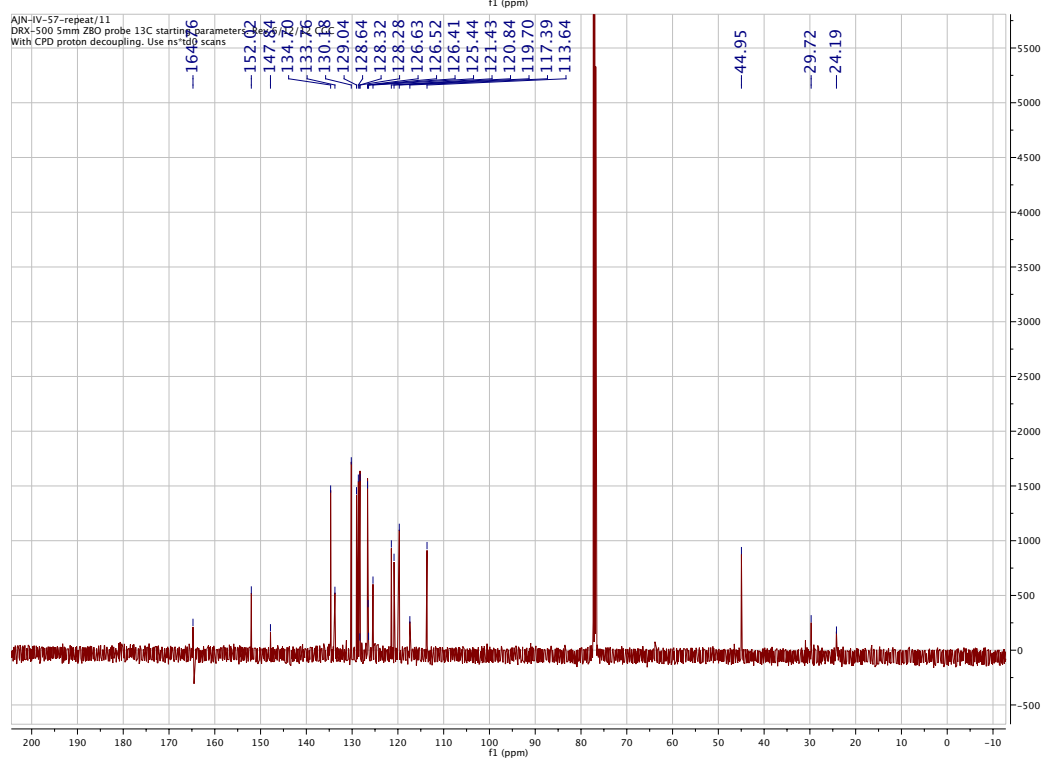

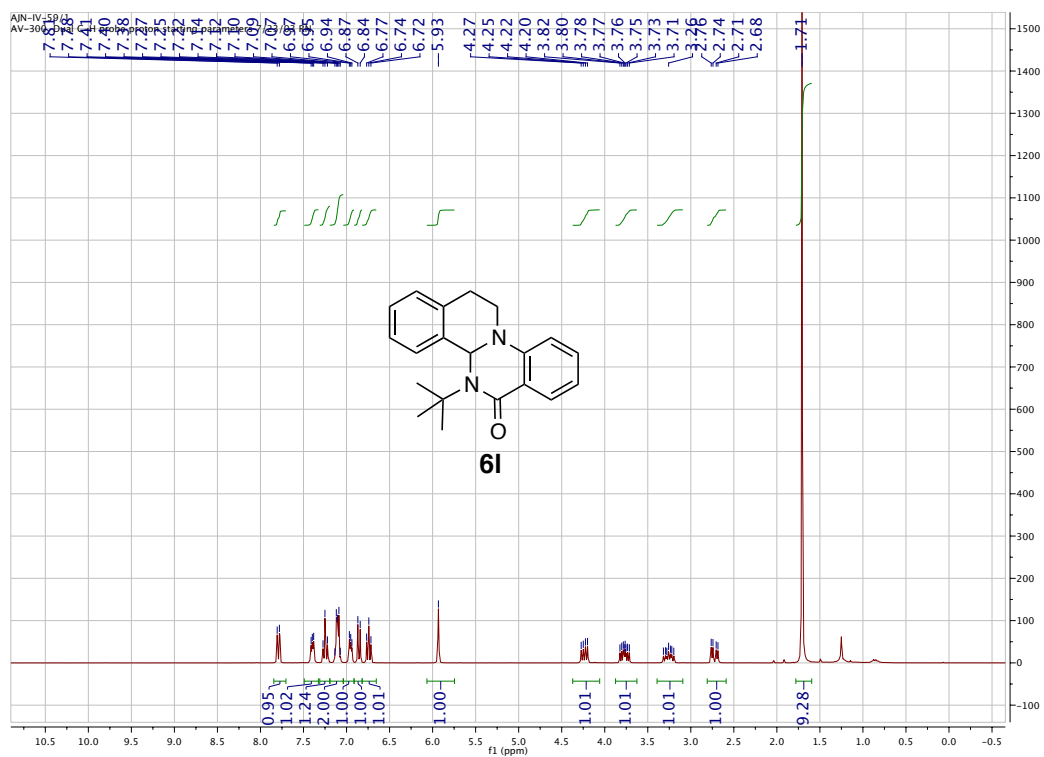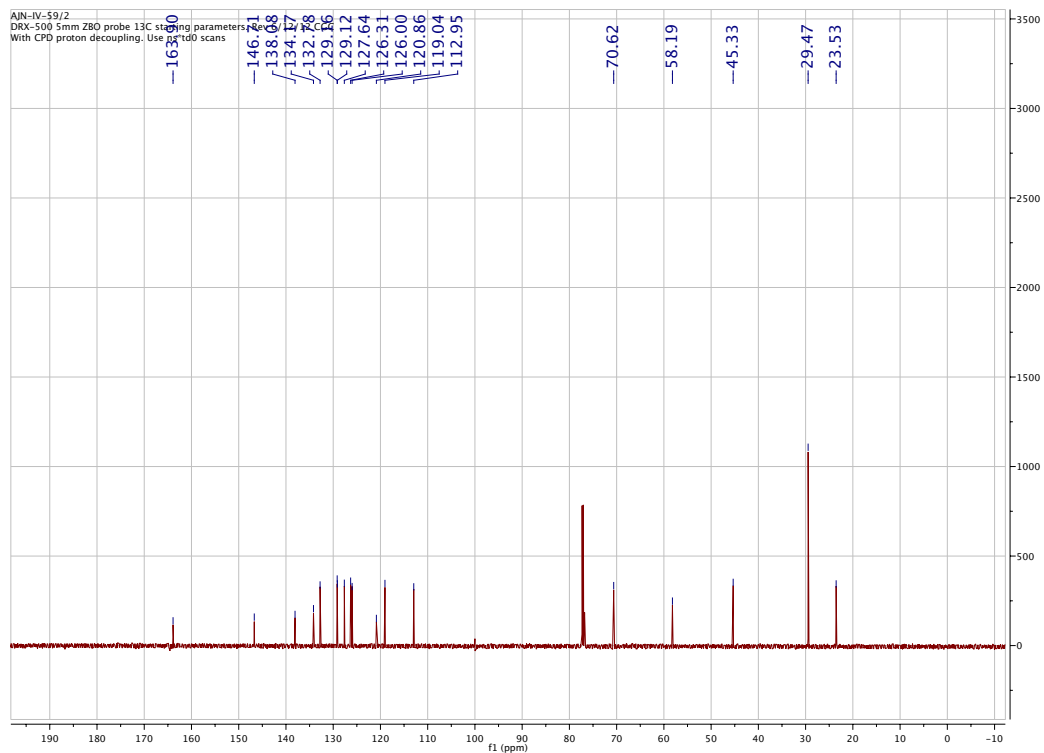

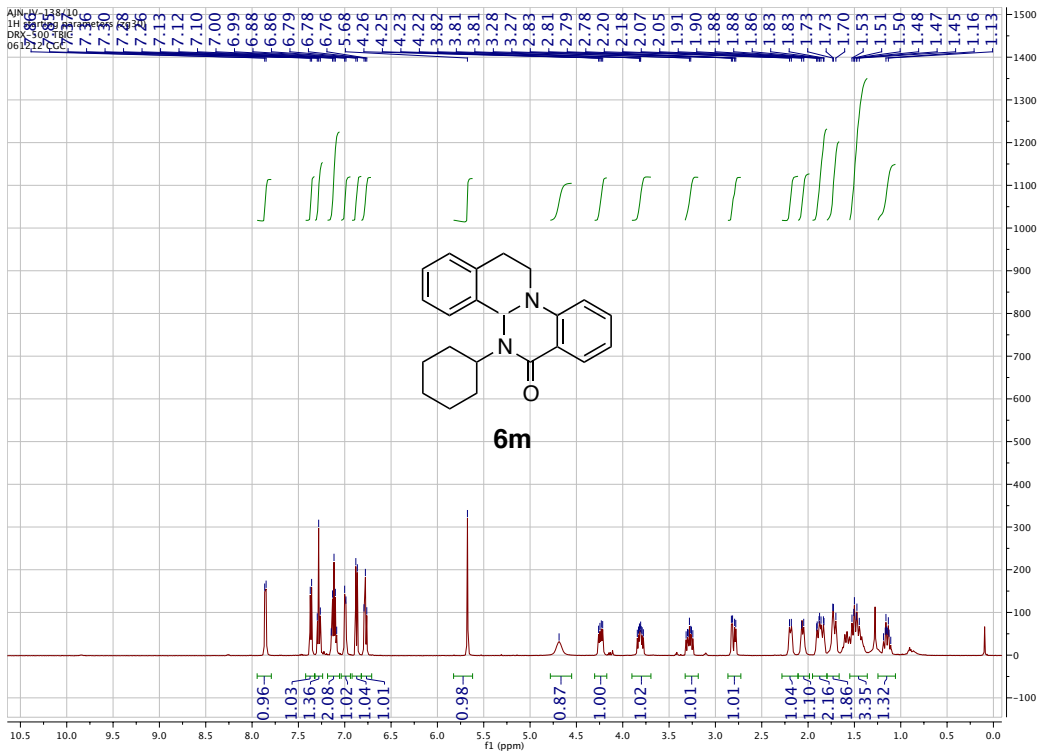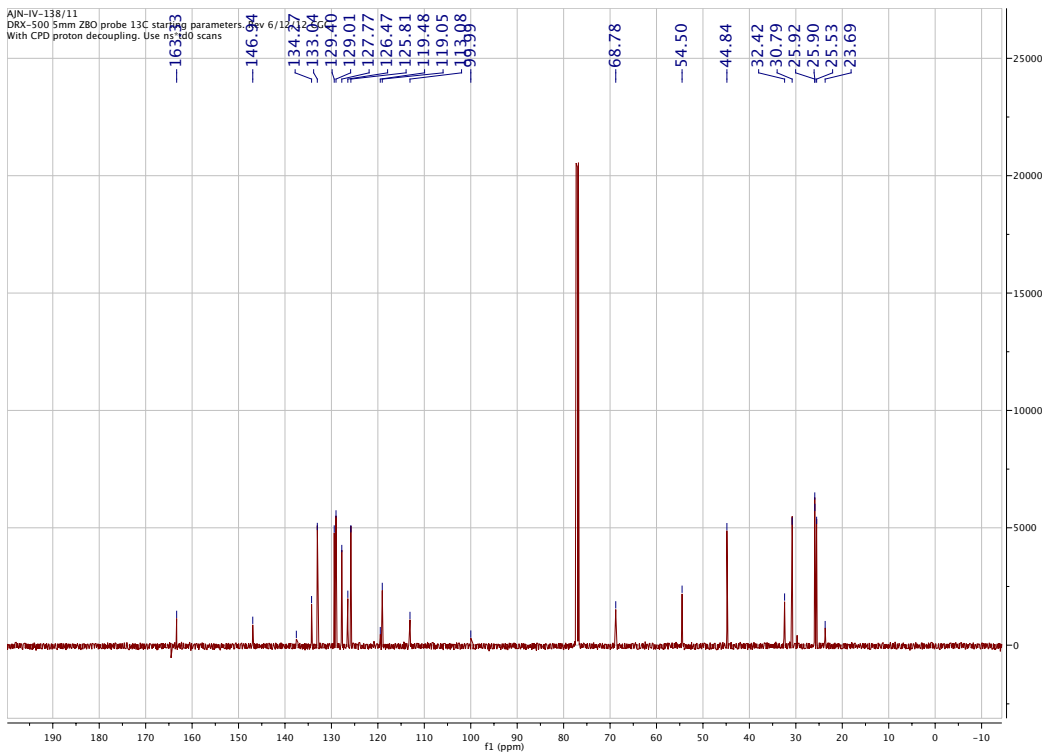

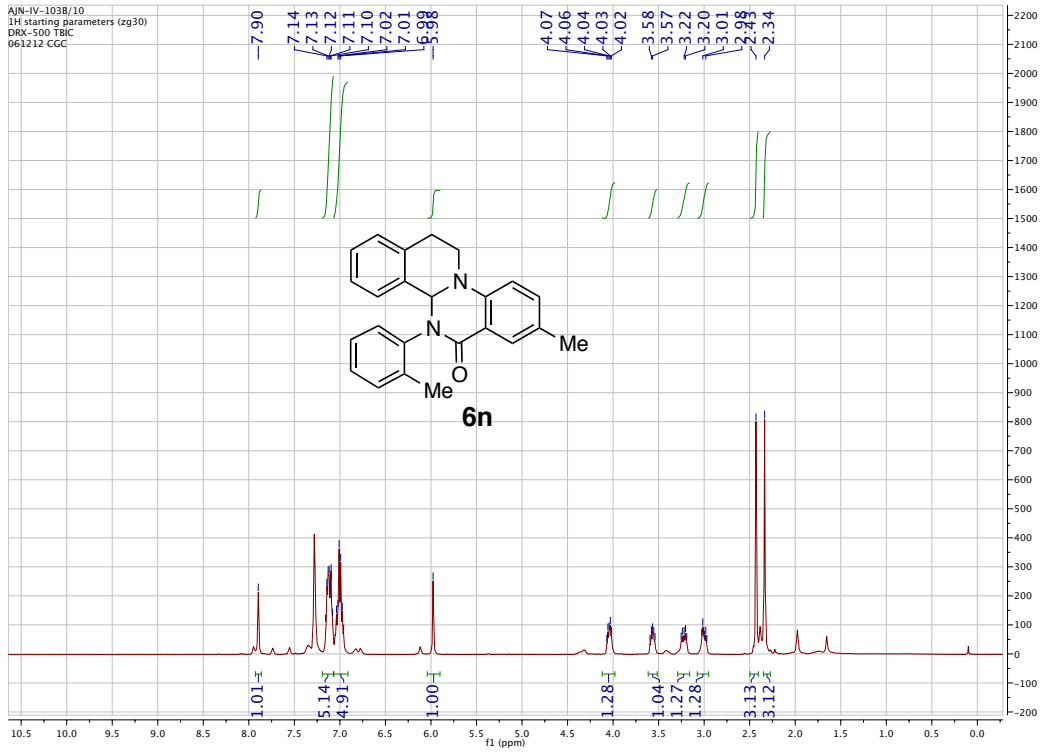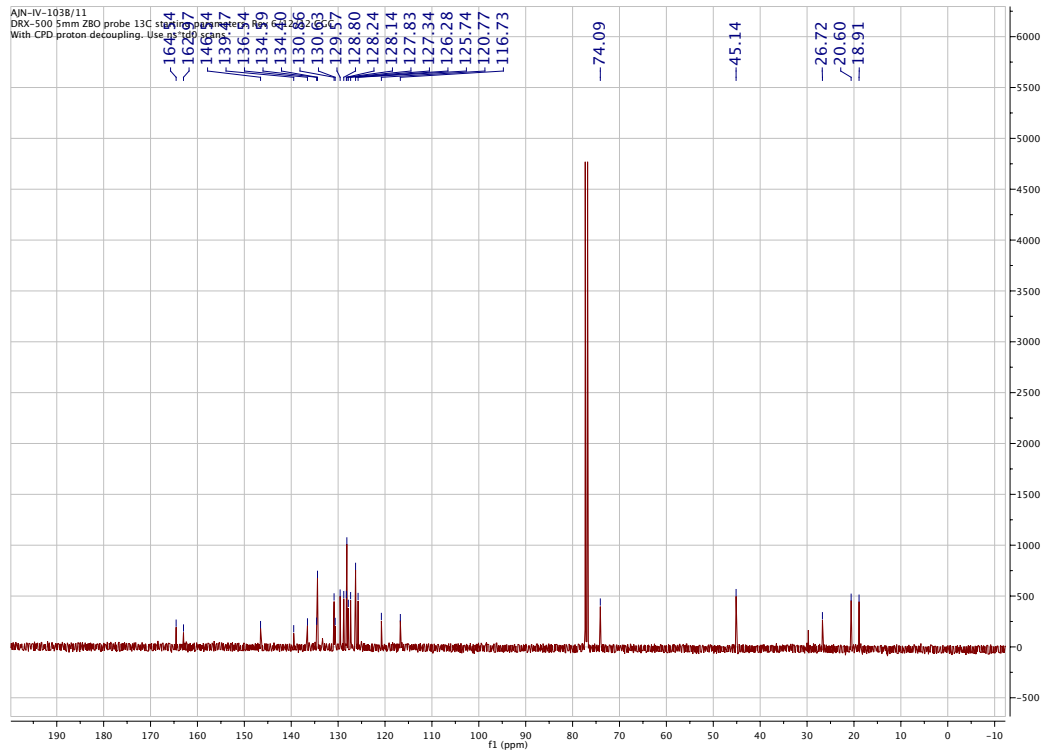

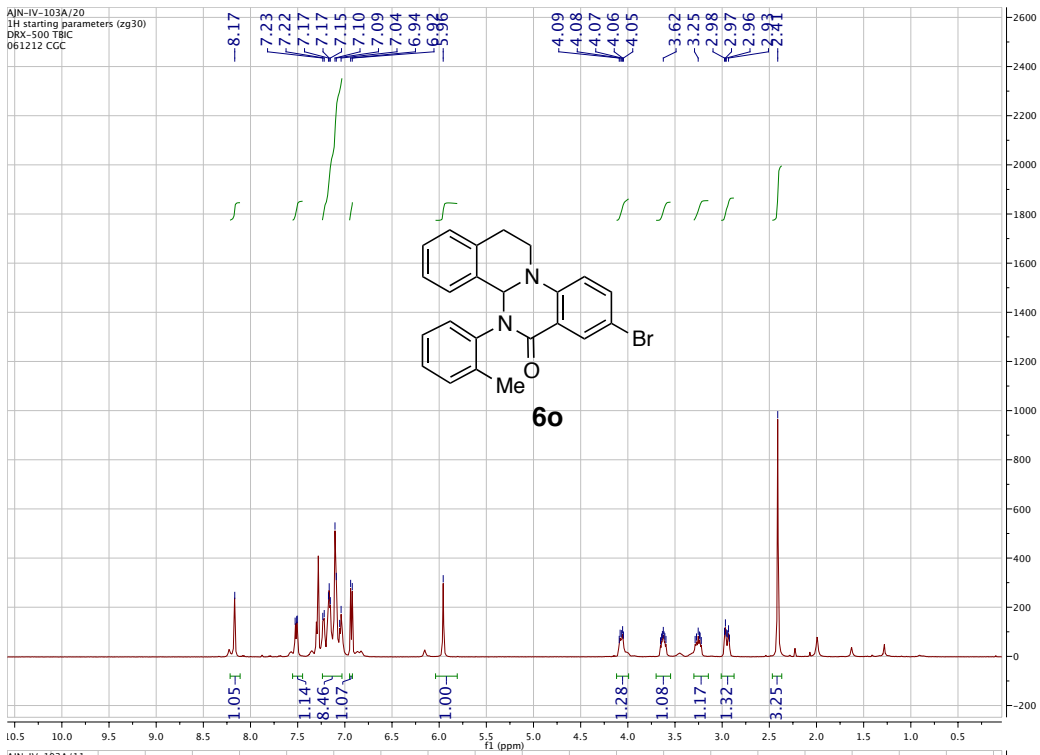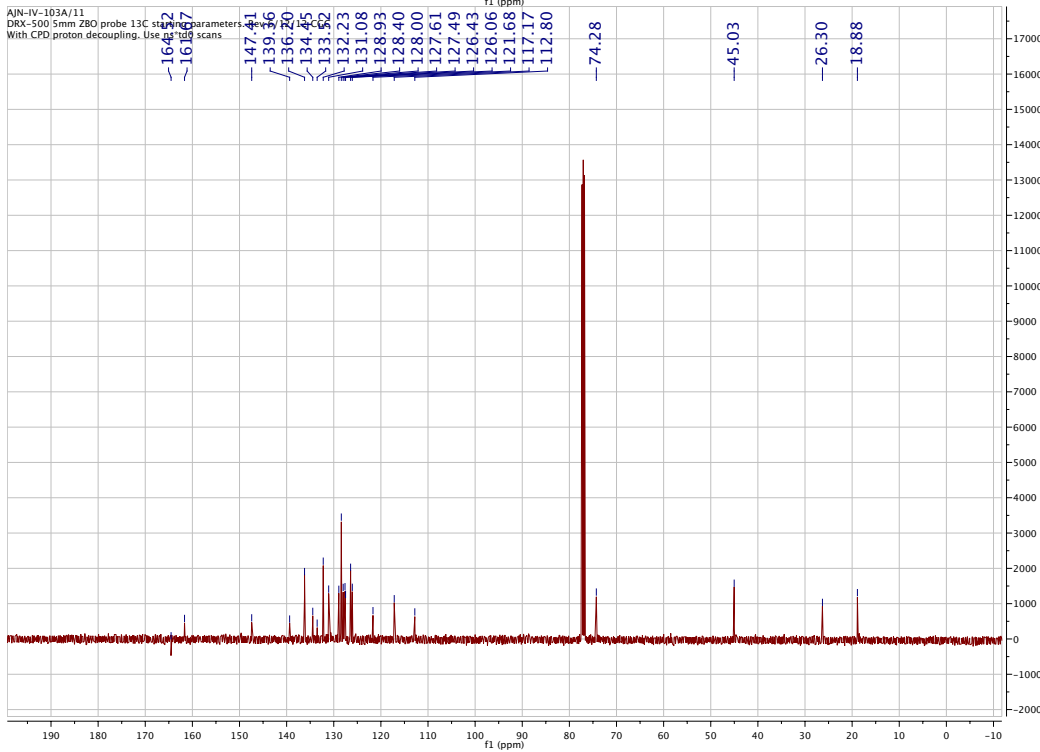



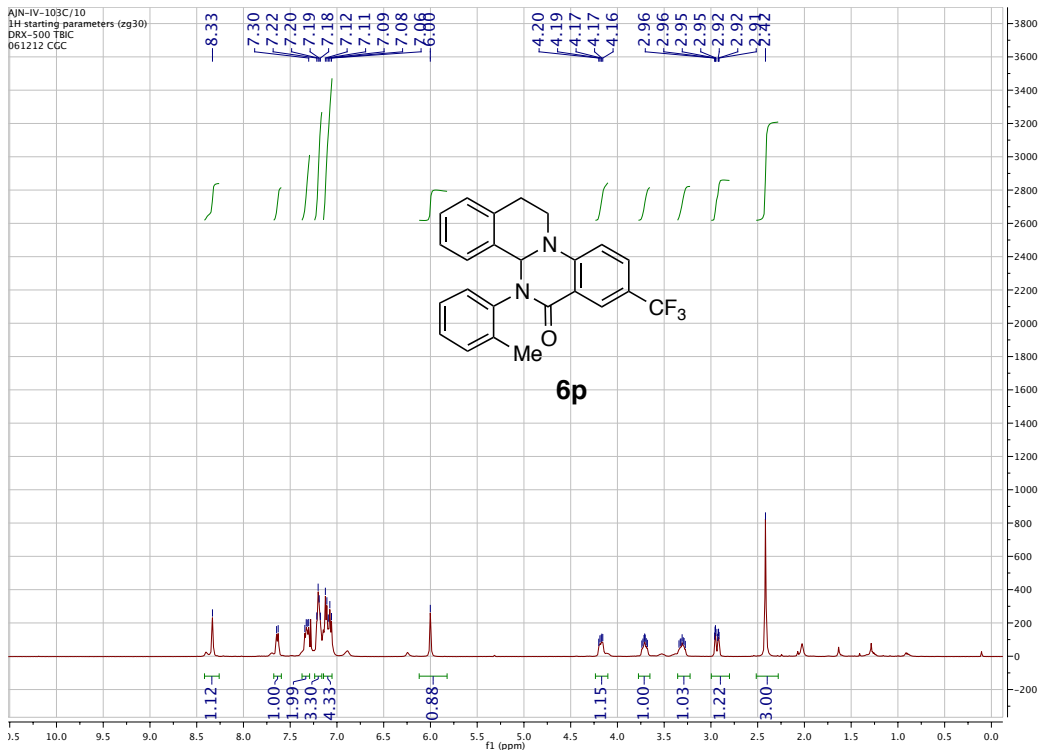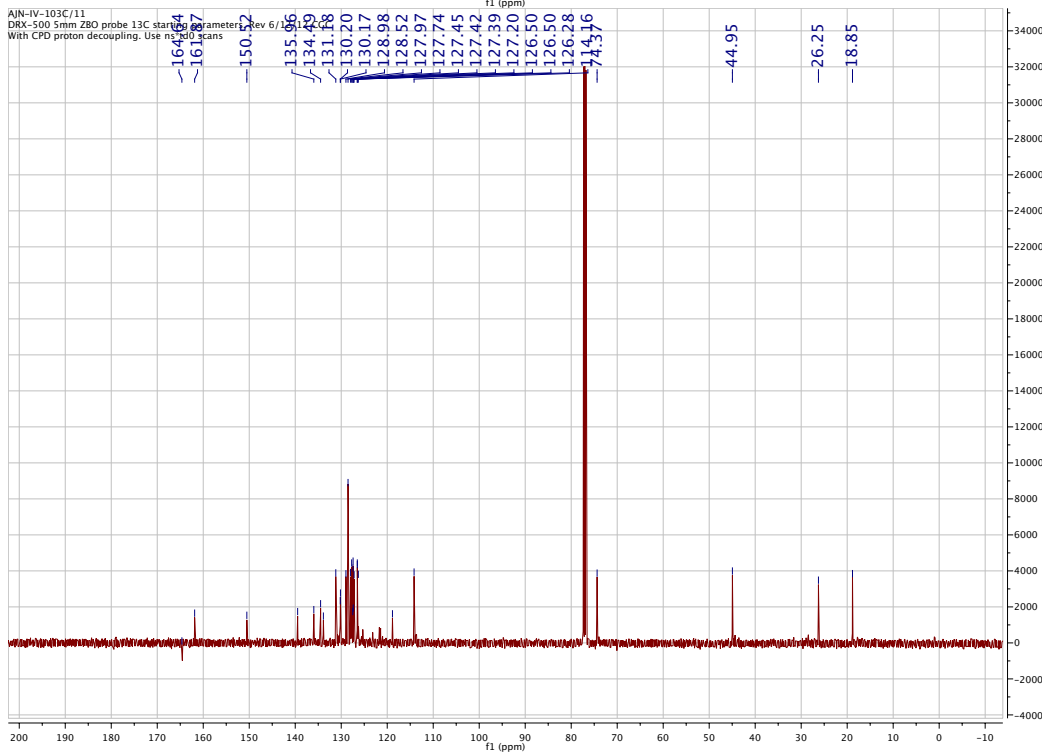

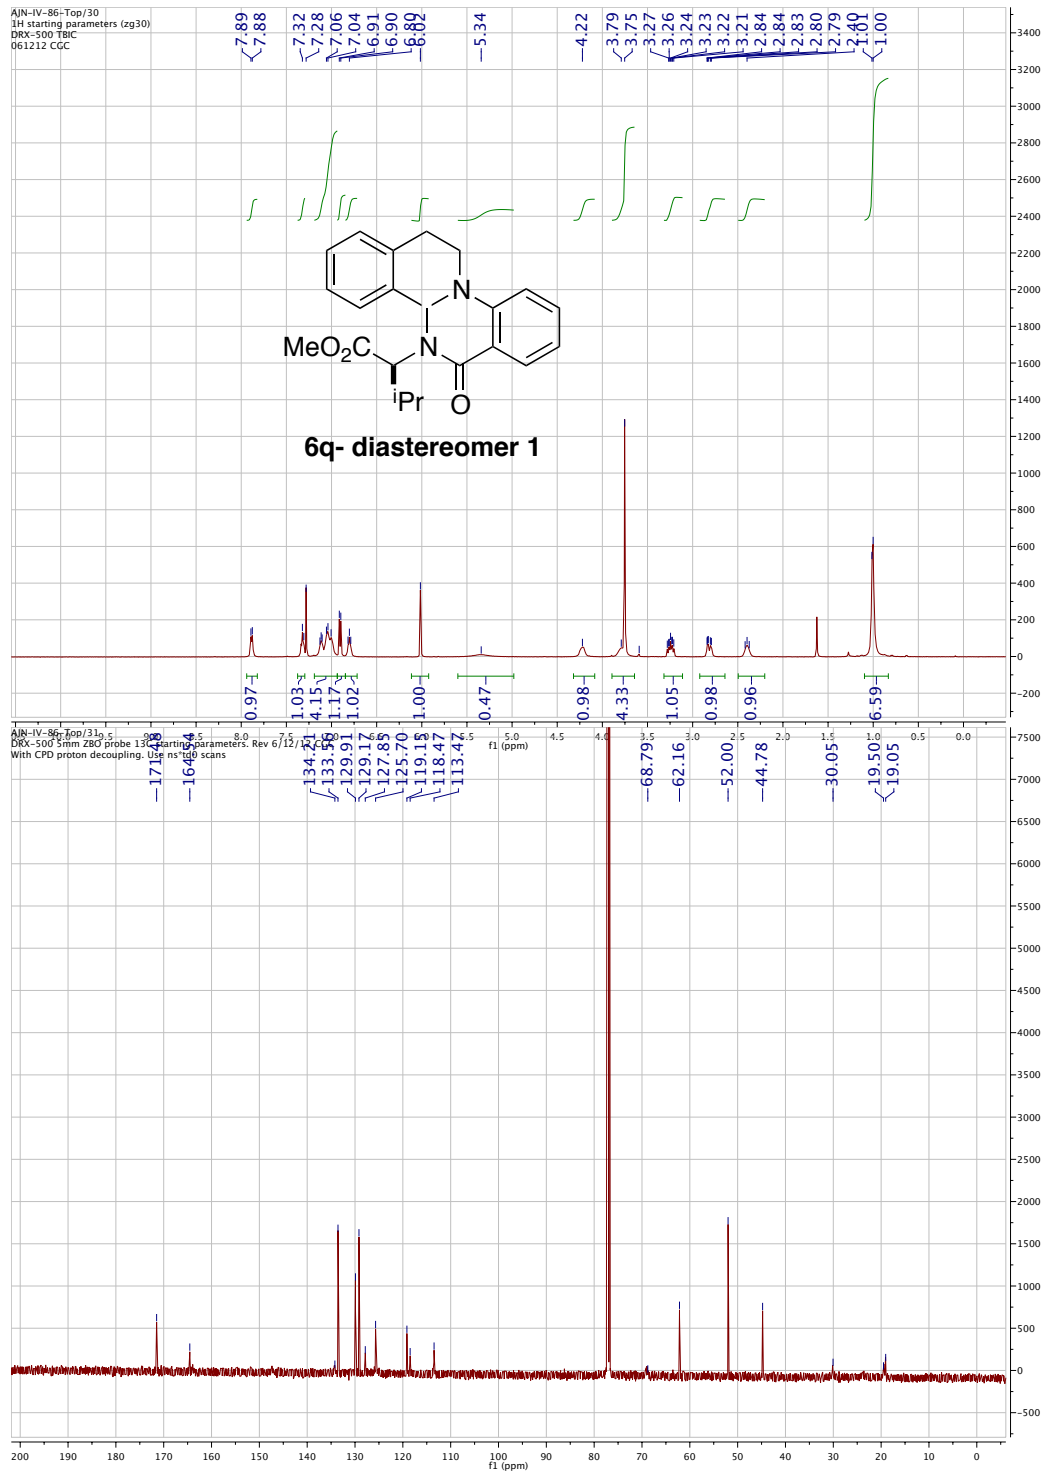

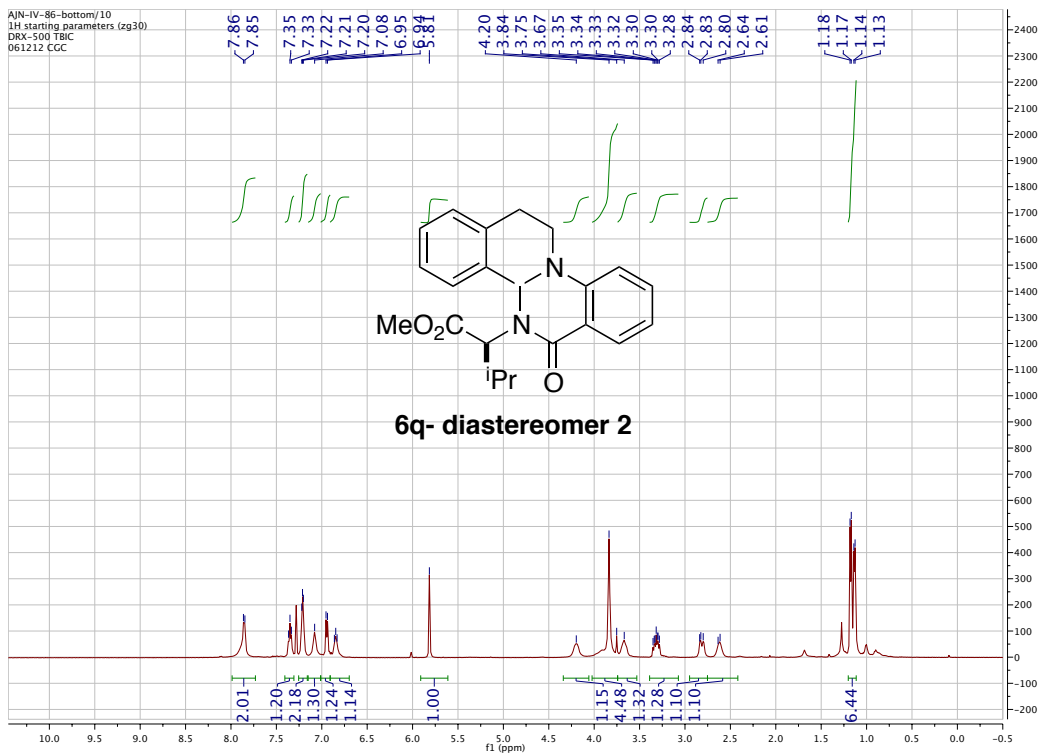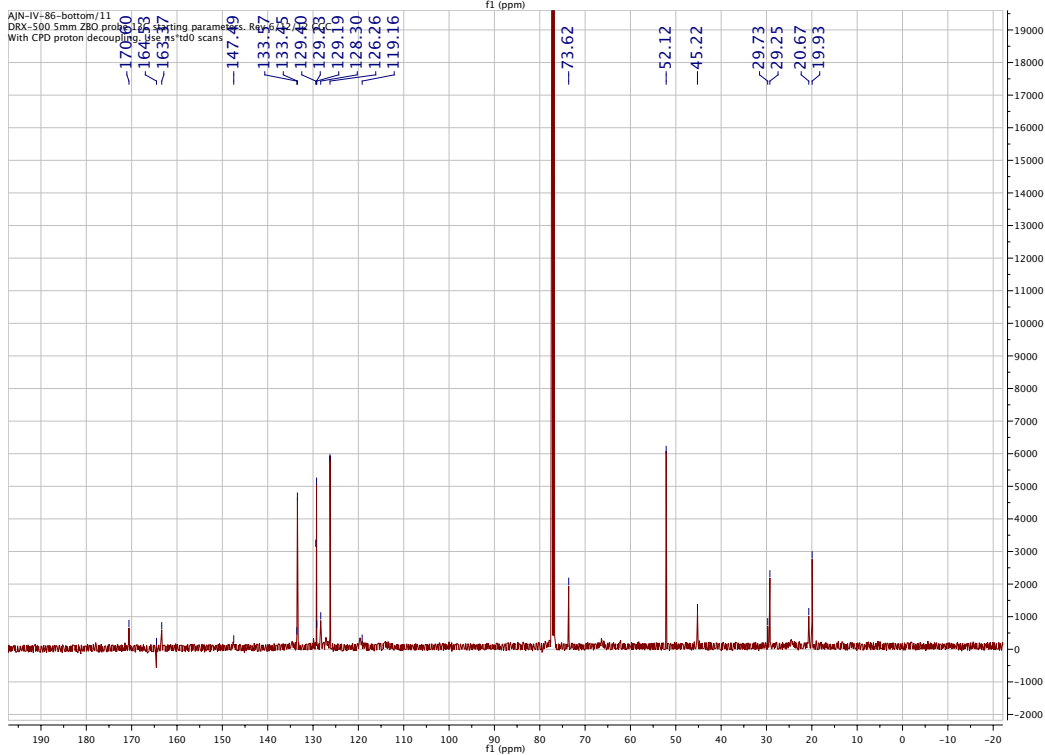

Supplement: NIHMS609142-supplement-Supporting_information.pdf [file NIHMS609142-supplement-Supporting_information.pdf]
